# Supplementary material
Source: Research Square preprint supplement (doi:10.21203/rs.3.rs-9681180/v1)
Supplement: Supplementary file 1 [file 3978df44367388bdea4abd88.docx]

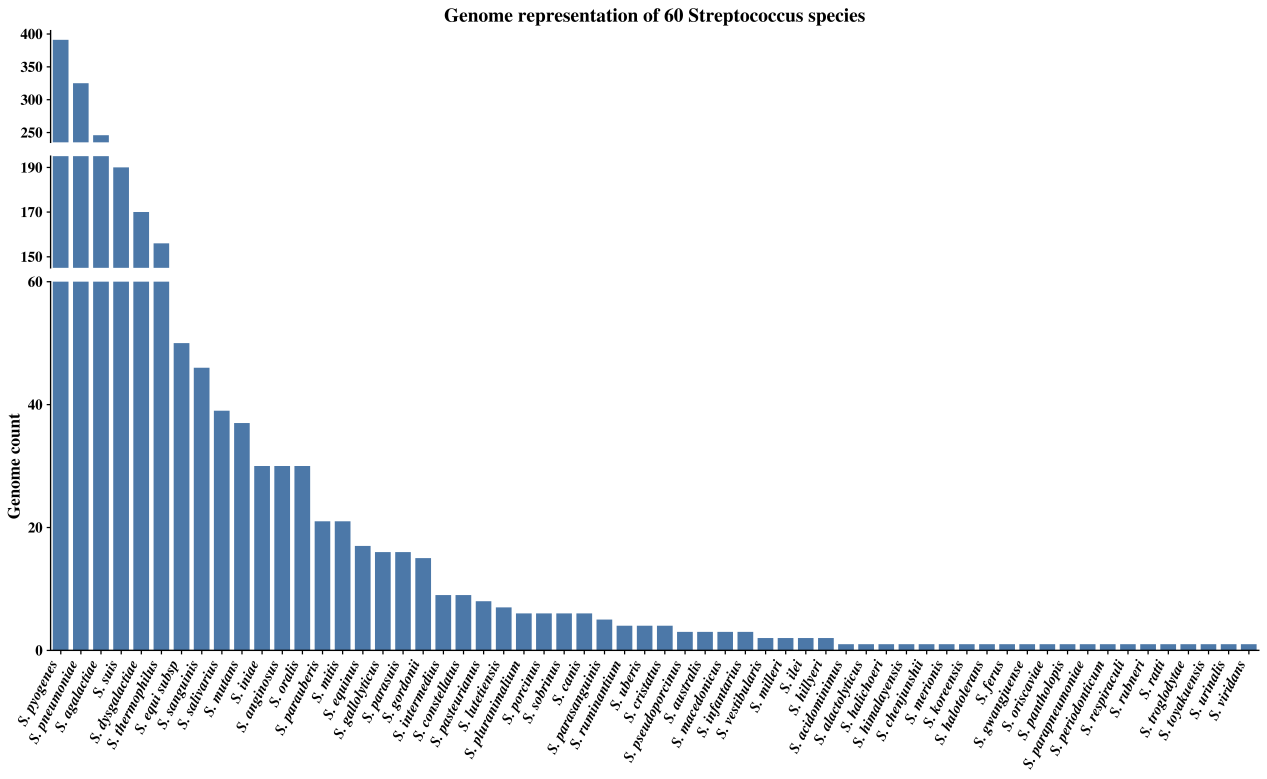


### Fig. S1 Genome representation of 60 Streptococcus species included in this study. Genome counts for all complete chromosomal sequences analyzed in this study. A broken-axis layout was used to improve visualization of highly abundant species while retaining low-abundance species in the same figure.


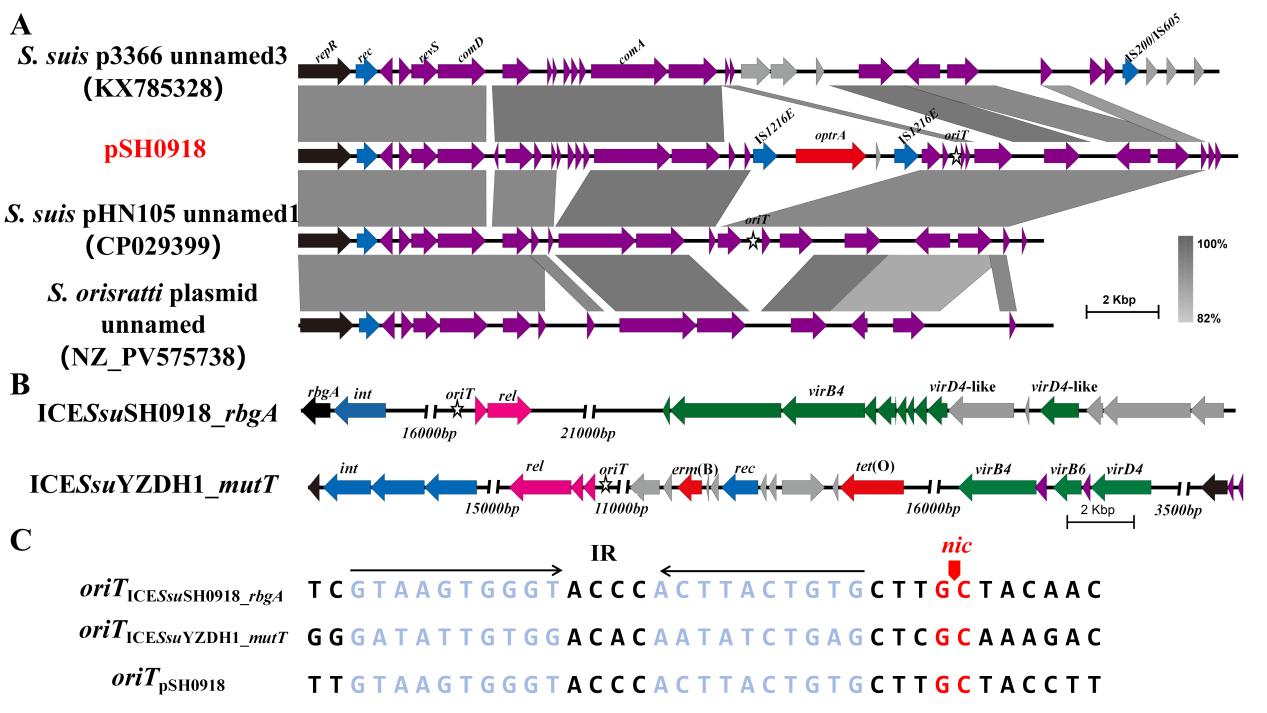


**Fig. S2** Comparative sequence analysis of the *S. suis* plasmid pSH0918, related plasmids, and ICEs. **(A)** Sequence comparison of pSH0918 with three related plasmids, including *S. suis* p3366 unnamed3 (KX785328), *S. suis* pHN105 unnamed1 (CP029399), and the *S. orisratti* unnamed plasmid (NZ_PV575738). **(B)** Structural comparison of ICE*Ssu*SH0918_*rbgA* and ICE*Ssu*YZDH1_*mutT*, highlighting transfer- and mobilization-associated regions, including *oriT*-related loci. **(C)** Sequence alignment of the *oriT* regions of pSH0918, ICESsuYZDH1_*mutT* andICE*Ssu*SH0918_*rbgA*. Putative inverted repeats (IRs) are shown in light blue, and the predicted nicking site (*nic*) is indicated in red. Arrows indicate coding sequences and their transcriptional orientation. Homologous regions are shaded in gray. ICE-flanking chromosomal genes and plasmid replication genes are shown in black, integrase/transposase genes in blue, resistance genes in red, ICE/plasmid backbone genes in purple, relaxase genes in pink, T4SS- and T4CP-related genes in green, and variable genes in light gray.
