# Supplementary material
Source: Research Square preprint supplement (doi:10.21203/rs.3.rs-9681180/v1)
Supplement: Supplementary file 2 [file 5d1c875104fe1d7c082a4108.xlsx]

## Sheet: Table_caption
Table	Title	Description
Table S1	Genome-level summary of the complete Streptococcus chromosome dataset	This table lists the assembly accession, strain name, species assignment, and total number of detected MGEs for each complete Streptococcus chromosome included in this study.
Table S2	Plasmid information and mobility features in the Streptococcus dataset	This table summarizes plasmid accession, plasmid name, host species, element size, relaxase family, predicted mobility category, oriT sequence, ARG number, ARG content, and plasmid copy subtype for the 225 plasmids analyzed in this study.
Table S3	Information on ICEs identified in complete Streptococcus chromosomes	This table provides element-level information for predicted ICEs, including assembly accession, strain name, host species, element size, genomic location, integration locus, relaxase family, MPF type, oriT sequence, ARG number, ARG content, and GC content.
Table S4	Information on IMEs identified in complete Streptococcus chromosomes	This table provides element-level information for predicted IMEs, including assembly accession, strain name, host species, element size, genomic location, integration locus, relaxase family, oriT sequence, ARG number, ARG content, and GC content.
Table S5	Information on prophages identified in complete Streptococcus chromosomes	This table summarizes prophage-level information, including assembly accession, strain name, host species, element size, genomic location, integration locus, ARG number, and ARG content.
Table S6	Species-level distribution of MGEs and plasmids across the Streptococcus dataset	This table summarizes species-level MGE density and plasmid distribution. Table S6A shows the number of complete chromosomes, ICEs, IMEs, prophages, total chromosomal MGEs, and normalized MGE densities per genome for each species. Table S6B shows the number and proportion of plasmids, ARG-positive plasmids, and plasmid mobility categories, including non-mobile, mobilizable, and conjugative plasmi…

## Sheet: Table_S1_Genome_summary
Assembly accession	Strain name	Species	Total MGE count
GCA_009650295.1		Streptococcus dysgalactiae	8
GCA_012844385.1	TPCH-A19	Streptococcus dysgalactiae	6
GCA_012844405.1	TPCH-A74	Streptococcus dysgalactiae	7
GCA_013004125.1	TPCH-A88	Streptococcus dysgalactiae	7
GCA_014192695.1	89	Streptococcus dysgalactiae	5
GCA_014192895.1	159	Streptococcus dysgalactiae	5
GCA_016128095.1	FDAARGOS_1017	Streptococcus dysgalactiae	5
GCA_016128135.1	FDAARGOS_1016	Streptococcus dysgalactiae	10
GCA_016724885.1	FDAARGOS_1157	Streptococcus dysgalactiae	8
GCA_016766775.1		Streptococcus dysgalactiae	6
GCA_019265245.1		Streptococcus dysgalactiae	1
GCA_019265265.1		Streptococcus dysgalactiae	0
GCA_019265285.1		Streptococcus dysgalactiae	1
GCA_019265305.1		Streptococcus dysgalactiae	1
GCA_019265325.1		Streptococcus dysgalactiae	1
GCA_019273775.1		Streptococcus dysgalactiae	0
GCA_019856435.1	DY107	Streptococcus dysgalactiae	11
GCA_022532125.1	Karl	Streptococcus dysgalactiae	4
GCA_026692645.1	WJ001	Streptococcus dysgalactiae	8
GCA_029234045.1	MGCS36089	Streptococcus dysgalactiae	7
GCA_029234065.1	MGCS36083	Streptococcus dysgalactiae	9
GCA_029234095.1	MGGS36055	Streptococcus dysgalactiae	6
GCA_029234115.1	MGCS36044	Streptococcus dysgalactiae	7
GCA_029234135.1	MGCS35957	Streptococcus dysgalactiae	9
GCA_029234155.1	MGCS35823	Streptococcus dysgalactiae	8
GCA_029234175.1	MGCS35922	Streptococcus dysgalactiae	9
GCA_030034695.1	UT_120444	Streptococcus dysgalactiae	8
GCA_030034715.1	UT_10236	Streptococcus dysgalactiae	6
GCA_030291215.1	TPCH-F37	Streptococcus dysgalactiae	5
GCA_035666155.1	lu24	Streptococcus dysgalactiae	3
GCA_036815195.1	NS3396	Streptococcus dysgalactiae	5
GCA_042821045.1	MGGS36030	Streptococcus dysgalactiae	6
GCA_042821135.1	MGGS36021	Streptococcus dysgalactiae	7
GCA_042822305.1	MGGS35977	Streptococcus dysgalactiae	7
GCA_042822795.1	MGCS36101	Streptococcus dysgalactiae	7
GCA_042823405.1	MGCS36090	Streptococcus dysgalactiae	8
GCA_042823915.1	MGCS36086	Streptococcus dysgalactiae	7
GCA_042824005.1	MGCS36085	Streptococcus dysgalactiae	8
GCA_042824935.1	MGCS36071	Streptococcus dysgalactiae	8
GCA_042825465.1	MGCS36067	Streptococcus dysgalactiae	7
GCA_042826005.1	MGCS36066	Streptococcus dysgalactiae	8
GCA_042826515.1		Streptococcus dysgalactiae	0
GCA_042826985.1		Streptococcus dysgalactiae	0
GCA_042827775.1		Streptococcus dysgalactiae	0
GCA_042828865.1	MGCS36049	Streptococcus dysgalactiae	7
GCA_042829395.1	MGCS36046	Streptococcus dysgalactiae	1
GCA_042829845.1	MGCS36045	Streptococcus dysgalactiae	1
GCA_042830455.1	MGCS36042	Streptococcus dysgalactiae	7
GCA_042830985.1	MGCS36038	Streptococcus dysgalactiae	7
GCA_042831615.1	MGCS36035	Streptococcus dysgalactiae	1
GCA_042832205.1	MGCS36034	Streptococcus dysgalactiae	1
GCA_042832795.1		Streptococcus dysgalactiae	0
GCA_042833365.1		Streptococcus dysgalactiae	0
GCA_042833835.1		Streptococcus dysgalactiae	0
GCA_042834645.1		Streptococcus dysgalactiae	0
GCA_042835325.1		Streptococcus dysgalactiae	0
GCA_042835875.1	MGCS36018	Streptococcus dysgalactiae	7
GCA_042836465.1	MGCS36016	Streptococcus dysgalactiae	8
GCA_042836995.1	MGCS36014	Streptococcus dysgalactiae	7
GCA_042837585.1	MGCS36011	Streptococcus dysgalactiae	8
GCA_042838115.1		Streptococcus dysgalactiae	0
GCA_042838705.1		Streptococcus dysgalactiae	0
GCA_042839455.1	MGCS36000	Streptococcus dysgalactiae	7
GCA_042839885.1	MGCS35999	Streptococcus dysgalactiae	7
GCA_042840455.1	MGCS35997	Streptococcus dysgalactiae	7
GCA_042840885.1	MGCS35988	Streptococcus dysgalactiae	7
GCA_042841075.1	MGCS35987	Streptococcus dysgalactiae	7
GCA_042841845.1	MGCS35984	Streptococcus dysgalactiae	7
GCA_042842215.1	MGCS35983	Streptococcus dysgalactiae	7
GCA_042842865.1	MGCS35980	Streptococcus dysgalactiae	9
GCA_042843455.1	MGCS35978	Streptococcus dysgalactiae	8
GCA_042844005.1	MGCS35973	Streptococcus dysgalactiae	7
GCA_042844555.1	MGCS35972	Streptococcus dysgalactiae	7
GCA_042845125.1		Streptococcus dysgalactiae	0
GCA_042845655.1	MGCS35965	Streptococcus dysgalactiae	8
GCA_042847285.1	MGCS35960	Streptococcus dysgalactiae	6
GCA_042848965.1	MGCS35953	Streptococcus dysgalactiae	7
GCA_042850475.1	MGCS35952	Streptococcus dysgalactiae	7
GCA_042852015.1	MGCS35941	Streptococcus dysgalactiae	7
GCA_042853255.1	MGCS35940	Streptococcus dysgalactiae	8
GCA_042854585.1	MGCS35939	Streptococcus dysgalactiae	7
GCA_042855555.1	MGCS35926	Streptococcus dysgalactiae	8
GCA_042856145.1		Streptococcus dysgalactiae	0
GCA_042856795.1		Streptococcus dysgalactiae	0
GCA_042857585.1		Streptococcus dysgalactiae	0
GCA_042858075.1	MGCS35904	Streptococcus dysgalactiae	6
GCA_042858705.1	MGCS35901	Streptococcus dysgalactiae	7
GCA_042859375.1	MGCS35898	Streptococcus dysgalactiae	6
GCA_042859885.1		Streptococcus dysgalactiae	0
GCA_042860615.1	MGCS35893	Streptococcus dysgalactiae	8
GCA_042861675.1	MGCS35892	Streptococcus dysgalactiae	7
GCA_042863435.1	MGCS35887	Streptococcus dysgalactiae	7
GCA_042866015.1	MGCS35876	Streptococcus dysgalactiae	8
GCA_042868505.1	MGCS35873	Streptococcus dysgalactiae	8
GCA_042871315.1	MGCS35871	Streptococcus dysgalactiae	7
GCA_042873075.1	MGCS35869	Streptococcus dysgalactiae	7
GCA_042876235.1	MGCS35868	Streptococcus dysgalactiae	7
GCA_042878675.1	MGCS35867	Streptococcus dysgalactiae	8
GCA_042881415.1	MGCS35861	Streptococcus dysgalactiae	7
GCA_042884265.1	MGCS35858	Streptococcus dysgalactiae	8
GCA_042887365.1	MGCS35856	Streptococcus dysgalactiae	8
GCA_042890665.1	MGCS35855	Streptococcus dysgalactiae	6
GCA_042895565.1	MGCS35853	Streptococcus dysgalactiae	8
GCA_042899835.1	MGCS35850	Streptococcus dysgalactiae	8
GCA_042902765.1	MGCS35844	Streptococcus dysgalactiae	7
GCA_042903515.1	MGCS35838	Streptococcus dysgalactiae	8
GCA_042904165.1	MGCS35828	Streptococcus dysgalactiae	6
GCA_042904735.1	MGCS35822	Streptococcus dysgalactiae	7
GCA_042905385.1	MGCS35817	Streptococcus dysgalactiae	7
GCA_042905975.1	MGCS35810	Streptococcus dysgalactiae	7
GCA_042906585.1	MGCS35808	Streptococcus dysgalactiae	7
GCA_042907155.1	MGCS35799	Streptococcus dysgalactiae	7
GCA_042907745.1	MGCS35798	Streptococcus dysgalactiae	7
GCA_042908255.1	MGCS35785	Streptococcus dysgalactiae	7
GCA_042908825.1	MGCS35780	Streptococcus dysgalactiae	8
GCA_042909395.1	MGCS35777	Streptococcus dysgalactiae	8
GCA_042909985.1	MGCS35757	Streptococcus dysgalactiae	8
GCA_042910495.1	MGCS35755	Streptococcus dysgalactiae	7
GCA_042911105.1	MGCS35754	Streptococcus dysgalactiae	6
GCA_042911635.1	MGCS35744	Streptococcus dysgalactiae	6
GCA_042912165.1	MGCS35741	Streptococcus dysgalactiae	7
GCA_042912675.1	MGCS35737	Streptococcus dysgalactiae	8
GCA_042913305.1	MGCS35730	Streptococcus dysgalactiae	6
GCA_042913815.1	MGCS35725	Streptococcus dysgalactiae	7
GCA_042914585.1	MGCS35718	Streptococcus dysgalactiae	8
GCA_042914955.1	MGCS35716	Streptococcus dysgalactiae	7
GCA_042915565.1	MGCS35714	Streptococcus dysgalactiae	8
GCA_042916075.1	MGCS35713	Streptococcus dysgalactiae	7
GCA_042916705.1	MGCS35710	Streptococcus dysgalactiae	9
GCA_042917235.1	MGCS35707	Streptococcus dysgalactiae	7
GCA_042917805.1	MGCS35706	Streptococcus dysgalactiae	8
GCA_042918355.1	MGCS35705	Streptococcus dysgalactiae	8
GCA_042918885.1	MGCS35698	Streptococcus dysgalactiae	8
GCA_042920665.1	MGCS35703	Streptococcus dysgalactiae	7
GCA_042921085.1	MGCS35689	Streptococcus dysgalactiae	7
GCA_042921695.1	MGCS35685	Streptococcus dysgalactiae	7
GCA_042922305.1	MGCS35681	Streptococcus dysgalactiae	8
GCA_042922855.1	MGCS35679	Streptococcus dysgalactiae	6
GCA_042923325.1	MGCS35678	Streptococcus dysgalactiae	7
GCA_042924555.1	MGCS35665	Streptococcus dysgalactiae	6
GCA_042925125.1	MGCS35660	Streptococcus dysgalactiae	9
GCA_042925415.1	MGCS35648	Streptococcus dysgalactiae	8
GCA_042925425.1	MGCS35642	Streptococcus dysgalactiae	8
GCA_042925715.1	MGCS35633	Streptococcus dysgalactiae	7
GCA_042926125.1	MGAS35772	Streptococcus dysgalactiae	1
GCA_045345565.1	STG643	Streptococcus dysgalactiae	7
GCA_900474785.1	NCTC5370	Streptococcus dysgalactiae	3
GCA_900475145.1	NCTC5371	Streptococcus dysgalactiae	5
GCA_900475185.1	NCTC6179	Streptococcus dysgalactiae	5
GCA_900475255.1	NCTC9414	Streptococcus dysgalactiae	6
GCA_900475725.1	NCTC7136	Streptococcus dysgalactiae	10
GCA_900635345.1	NCTC4669	Streptococcus dysgalactiae	9
GCA_900636815.1	NCTC6181	Streptococcus dysgalactiae	6
GCA_901542365.1	NCTC8546	Streptococcus dysgalactiae	5
GCA_901543615.1	NCTC9413	Streptococcus dysgalactiae	6
GCA_901543725.1	NCTC6403	Streptococcus dysgalactiae	6
GCA_901543995.1	NCTC11554	Streptococcus dysgalactiae	2
GCA_901544215.1	NCTC11556	Streptococcus dysgalactiae	5
GCA_000010705.1	GGS_124	Streptococcus dysgalactiae	5
GCA_000188315.1		Streptococcus dysgalactiae	6
GCA_000188715.1	ATCC 12394	Streptococcus dysgalactiae	7
GCA_000307185.1	RE378	Streptococcus dysgalactiae	7
GCA_000317855.1	AC-2713	Streptococcus dysgalactiae	6
GCA_000493775.1	167	Streptococcus dysgalactiae	2
GCA_003967135.1	Kdys0611	Streptococcus dysgalactiae	7
GCA_008693725.1	FDAARGOS_654	Streptococcus dysgalactiae	7
GCA_009497975.1		Streptococcus dysgalactiae	1
GCA_009650235.1		Streptococcus dysgalactiae	8
GCA_009650255.1		Streptococcus dysgalactiae	9
GCA_009650275.1		Streptococcus dysgalactiae	7
GCA_900187245.1	NCTC11291	Streptococcus acidominimus	8
GCA_000636115.1		Streptococcus agalactiae	0
GCA_000689235.1	COH1	Streptococcus agalactiae	4
GCA_000730215.2	NGBS061	Streptococcus agalactiae	3
GCA_000730255.1	NGBS572	Streptococcus agalactiae	3
GCA_000782855.1	CNCTC 10/84	Streptococcus agalactiae	4
GCA_000831105.1	GBS6	Streptococcus agalactiae	10
GCA_000831125.1	GBS2-NM	Streptococcus agalactiae	9
GCA_000831145.1	GBS1-NY	Streptococcus agalactiae	9
GCA_000967445.1		Streptococcus agalactiae	0
GCA_001026925.1	SS1	Streptococcus agalactiae	7
GCA_001190805.1	HN016	Streptococcus agalactiae	5
GCA_001190825.1		Streptococcus agalactiae	5
GCA_001190845.1		Streptococcus agalactiae	5
GCA_001190865.1		Streptococcus agalactiae	0
GCA_001190885.1	H002	Streptococcus agalactiae	5
GCA_001266635.1	GBS85147	Streptococcus agalactiae	2
GCA_001275545.2	SG-M1	Streptococcus agalactiae	6
GCA_001448985.1	GBS ST-1	Streptococcus agalactiae	8
GCA_001552035.1	NGBS128	Streptococcus agalactiae	4
GCA_001592385.1	CU_GBS_08	Streptococcus agalactiae	7
GCA_001592425.1	CU_GBS_98	Streptococcus agalactiae	1
GCA_001655175.1		Streptococcus agalactiae	0
GCA_001683515.1	FWL1402	Streptococcus agalactiae	6
GCA_001712835.1	NGBS357	Streptococcus agalactiae	10
GCA_001729925.2	WC1535	Streptococcus agalactiae	7
GCA_001908255.1		Streptococcus agalactiae	0
GCA_001932715.1	GBS-M002	Streptococcus agalactiae	6
GCA_002025005.1	Sag158	Streptococcus agalactiae	6
GCA_002025025.1	Sag37	Streptococcus agalactiae	8
GCA_002073695.2	FDAARGOS_254	Streptococcus agalactiae	10
GCA_002197205.1	CUGBS591	Streptococcus agalactiae	10
GCA_002197245.1	SG-M50	Streptococcus agalactiae	6
GCA_002197265.1	SG-M158	Streptococcus agalactiae	6
GCA_002197285.1	SG-M29	Streptococcus agalactiae	6
GCA_002197305.1	SG-M25	Streptococcus agalactiae	7
GCA_002197325.1	SG-M8	Streptococcus agalactiae	6
GCA_002197365.1	SG-M6	Streptococcus agalactiae	6
GCA_002197385.1	SG-M4	Streptococcus agalactiae	6
GCA_002197425.1	SG-M163	Streptococcus agalactiae	6
GCA_002214425.1	C001	Streptococcus agalactiae	5
GCA_002289205.1	874391	Streptococcus agalactiae	6
GCA_002812425.1	SGEHI2015-107	Streptococcus agalactiae	4
GCA_002812445.1	SGEHI2015-95	Streptococcus agalactiae	6
GCA_002812465.1	SGEHI2015-25	Streptococcus agalactiae	5
GCA_002812505.1	SGEHI2015-113	Streptococcus agalactiae	5
GCA_002881155.1		Streptococcus agalactiae	0
GCA_002881175.1		Streptococcus agalactiae	0
GCA_002881195.1		Streptococcus agalactiae	0
GCA_002881215.1		Streptococcus agalactiae	0
GCA_002881235.1		Streptococcus agalactiae	0
GCA_002881255.1		Streptococcus agalactiae	0
GCA_002881275.1		Streptococcus agalactiae	0
GCA_002881295.1		Streptococcus agalactiae	0
GCA_002881315.1		Streptococcus agalactiae	0
GCA_002881335.1		Streptococcus agalactiae	0
GCA_002881355.1		Streptococcus agalactiae	0
GCA_002881375.1		Streptococcus agalactiae	0
GCA_002881395.1		Streptococcus agalactiae	0
GCA_002881415.1		Streptococcus agalactiae	0
GCA_002881435.1		Streptococcus agalactiae	0
GCA_002881455.1		Streptococcus agalactiae	0
GCA_002881475.1		Streptococcus agalactiae	0
GCA_002881495.1		Streptococcus agalactiae	0
GCA_002881515.1		Streptococcus agalactiae	0
GCA_002881535.1		Streptococcus agalactiae	0
GCA_002881555.1		Streptococcus agalactiae	0
GCA_002881575.1		Streptococcus agalactiae	0
GCA_002881595.1		Streptococcus agalactiae	0
GCA_002881615.1		Streptococcus agalactiae	0
GCA_002881695.1		Streptococcus agalactiae	0
GCA_002881775.1		Streptococcus agalactiae	0
GCA_002881865.1		Streptococcus agalactiae	0
GCA_002881935.1		Streptococcus agalactiae	0
GCA_002882035.1		Streptococcus agalactiae	0
GCA_002882125.1		Streptococcus agalactiae	0
GCA_002882205.1		Streptococcus agalactiae	0
GCA_002882275.1		Streptococcus agalactiae	0
GCA_002882375.1		Streptococcus agalactiae	0
GCA_002882465.1		Streptococcus agalactiae	0
GCA_002882555.1		Streptococcus agalactiae	0
GCA_002882645.1		Streptococcus agalactiae	0
GCA_002882745.1		Streptococcus agalactiae	0
GCA_002882835.1		Streptococcus agalactiae	0
GCA_003186145.1		Streptococcus agalactiae	0
GCA_003287995.1	B509	Streptococcus agalactiae	5
GCA_003288015.1	B508	Streptococcus agalactiae	3
GCA_003288035.1	B105	Streptococcus agalactiae	6
GCA_003288055.1	B507	Streptococcus agalactiae	8
GCA_003288075.1	B111	Streptococcus agalactiae	7
GCA_003319215.1	S73	Streptococcus agalactiae	5
GCA_003403115.1	Sag27	Streptococcus agalactiae	9
GCA_003812805.1	FDAARGOS_512	Streptococcus agalactiae	5
GCA_003939065.1	TFJ0901	Streptococcus agalactiae	5
GCA_003966545.1	HU-GS5823	Streptococcus agalactiae	4
GCA_006716245.1	32790-3A	Streptococcus agalactiae	5
GCA_006874565.1	PLGBS13	Streptococcus agalactiae	6
GCA_008693505.1	FDAARGOS_669	Streptococcus agalactiae	5
GCA_008693585.1	FDAARGOS_670	Streptococcus agalactiae	7
GCA_009866845.1		Streptococcus agalactiae	4
GCA_009930895.1	YZ1605	Streptococcus agalactiae	7
GCA_009930915.1	NJ1606	Streptococcus agalactiae	7
GCA_011383065.1	ZQ0910	Streptococcus agalactiae	5
GCA_012222485.1	Sag153	Streptococcus agalactiae	8
GCA_012593885.1	515	Streptococcus agalactiae	3
GCA_013000945.1	01173	Streptococcus agalactiae	6
GCA_013414325.1	S9968	Streptococcus agalactiae	9
GCA_013786965.1	BJ01	Streptococcus agalactiae	7
GCA_014218075.1	GBS7	Streptococcus agalactiae	6
GCA_014218095.1	GBS11	Streptococcus agalactiae	7
GCA_014218115.1	GBS19	Streptococcus agalactiae	6
GCA_014218135.1	GBS28	Streptococcus agalactiae	7
GCA_014218155.1	GBS30	Streptococcus agalactiae	5
GCA_015221735.2	CJB111	Streptococcus agalactiae	6
GCA_016454805.1	2012-845	Streptococcus agalactiae	1
GCA_016454825.1		Streptococcus agalactiae	1
GCA_016454845.1		Streptococcus agalactiae	1
GCA_016454865.1		Streptococcus agalactiae	0
GCA_016454885.1		Streptococcus agalactiae	1
GCA_016454905.1		Streptococcus agalactiae	1
GCA_016454925.1		Streptococcus agalactiae	1
GCA_016454945.1		Streptococcus agalactiae	1
GCA_019552345.1	SS1168	Streptococcus agalactiae	5
GCA_021165795.1		Streptococcus agalactiae	7
GCA_021460175.1	MIN-181	Streptococcus agalactiae	8
GCA_021460195.1	MIN-180	Streptococcus agalactiae	2
GCA_021496805.1	SS114	Streptococcus agalactiae	7
GCA_021496825.1	SS102	Streptococcus agalactiae	6
GCA_021496845.1	SS44	Streptococcus agalactiae	6
GCA_021496865.1	SS43	Streptococcus agalactiae	6
GCA_021496885.1	GBS68	Streptococcus agalactiae	6
GCA_021496905.1	GBS20	Streptococcus agalactiae	6
GCA_021496945.1	SS111	Streptococcus agalactiae	7
GCA_021496965.1	GBS47	Streptococcus agalactiae	6
GCA_021655535.1	GCMC97051	Streptococcus agalactiae	6
GCA_023921925.1		Streptococcus agalactiae	5
GCA_024502145.1		Streptococcus agalactiae	3
GCA_025402735.1	TAH 10/84	Streptococcus agalactiae	4
GCA_025402755.1	TAH 10/84 dUdp	Streptococcus agalactiae	4
GCA_025402775.1	TAH 10/84 dMrvR	Streptococcus agalactiae	4
GCA_025808195.1	SA5087	Streptococcus agalactiae	8
GCA_029011195.1	VSI63	Streptococcus agalactiae	5
GCA_029011635.1	VSI15	Streptococcus agalactiae	9
GCA_029011675.1	VSI14	Streptococcus agalactiae	9
GCA_029278525.1	Guangzhou-SAG092	Streptococcus agalactiae	9
GCA_029537275.1	Guangzhou-SAG036	Streptococcus agalactiae	5
GCA_029625255.1	S5	Streptococcus agalactiae	3
GCA_029625275.1	S1	Streptococcus agalactiae	2
GCA_029917085.1	CS2108	Streptococcus agalactiae	7
GCA_030078235.1	CNCTC 10/84 dCas9	Streptococcus agalactiae	4
GCA_030078255.1	A909 sCas9	Streptococcus agalactiae	7
GCA_030078275.1	A909 sCas9revertant	Streptococcus agalactiae	7
GCA_030078295.1	CNCTC 10/84 sCas9	Streptococcus agalactiae	4
GCA_030078315.1	CNCTC 10/84 sCas9revertant	Streptococcus agalactiae	4
GCA_030078335.1	A909 dCas9	Streptococcus agalactiae	6
GCA_030078355.1	CNCTC 10/84 Cas9 AEKOrevertant	Streptococcus agalactiae	4
GCA_030078375.1	CNCTC 10/84 Cas9 AEKO	Streptococcus agalactiae	4
GCA_030078395.1	A909 Cas9 AEKOrevertant	Streptococcus agalactiae	7
GCA_030078415.1	A909 Cas9 AEKO	Streptococcus agalactiae	7
GCA_030323365.1	GBSIR0001	Streptococcus agalactiae	5
GCA_030489705.1	COH1	Streptococcus agalactiae	1
GCA_030489725.1	NEM316	Streptococcus agalactiae	1
GCA_030908265.1		Streptococcus agalactiae	0
GCA_030908305.1		Streptococcus agalactiae	0
GCA_030908345.1	18/19-02	Streptococcus agalactiae	7
GCA_031202875.1	BCJB4361	Streptococcus agalactiae	7
GCA_031202895.1	BCJB3586	Streptococcus agalactiae	7
GCA_031203395.1	BCJB3344	Streptococcus agalactiae	7
GCA_031203445.1	BCJB3343	Streptococcus agalactiae	3
GCA_031203465.1	BCJB2983	Streptococcus agalactiae	3
GCA_031203715.1	BCJB1835	Streptococcus agalactiae	7
GCA_031584935.1	Alim_agalac_1000	Streptococcus agalactiae	2
GCA_033798805.1	R31-snf2-MTast1	Streptococcus agalactiae	5
GCA_033798825.1	R92-rpsI	Streptococcus agalactiae	5
GCA_033798845.1	R31-snf2-MTase2	Streptococcus agalactiae	6
GCA_033798865.1	SagR92	Streptococcus agalactiae	6
GCA_033798885.1	SagR31	Streptococcus agalactiae	5
GCA_033798905.1	SagR40	Streptococcus agalactiae	9
GCA_033798925.1	R31-snf2	Streptococcus agalactiae	5
GCA_034329605.1	SagR40_TC	Streptococcus agalactiae	8
GCA_037217205.1	XM_1	Streptococcus agalactiae	5
GCA_037240675.1	SagR40_TC_rplL	Streptococcus agalactiae	10
GCA_037242635.1	SagR272_TC	Streptococcus agalactiae	8
GCA_037244275.1	SagR92_TC_rpsI	Streptococcus agalactiae	7
GCA_037246145.1	SagR266_TC_rplL	Streptococcus agalactiae	7
GCA_037248035.1	SagR266	Streptococcus agalactiae	6
GCA_039614755.1		Streptococcus agalactiae	5
GCA_040782815.1		Streptococcus agalactiae	0
GCA_040782895.1		Streptococcus agalactiae	0
GCA_040783455.1	QMA0539	Streptococcus agalactiae	6
GCA_040783465.1		Streptococcus agalactiae	0
GCA_040783475.1		Streptococcus agalactiae	0
GCA_041728555.1	SA2BKE	Streptococcus agalactiae	1
GCA_041804565.1	GBS-B4009	Streptococcus agalactiae	8
GCA_046529645.1	HU05/19	Streptococcus agalactiae	5
GCA_046529655.1	MA07	Streptococcus agalactiae	4
GCA_046529665.1	HU13/21	Streptococcus agalactiae	4
GCA_046529675.1	HU32/21	Streptococcus agalactiae	4
GCA_046529685.1	HU36/21	Streptococcus agalactiae	4
GCA_046529705.1	MA15	Streptococcus agalactiae	5
GCA_047783005.1	M18	Streptococcus agalactiae	9
GCA_047783015.1	M14	Streptococcus agalactiae	7
GCA_049677795.1	161002207-5	Streptococcus agalactiae	1
GCA_049678225.1		Streptococcus agalactiae	0
GCA_049803895.1	AR977	Streptococcus agalactiae	6
GCA_050367445.1	T44	Streptococcus agalactiae	7
GCA_050916465.1	SA001	Streptococcus agalactiae	5
GCA_050916535.1	NN168	Streptococcus agalactiae	4
GCA_050916545.1	NN105	Streptococcus agalactiae	5
GCA_050916555.1	NN067	Streptococcus agalactiae	3
GCA_050916565.1	GZ289	Streptococcus agalactiae	5
GCA_900078265.1		Streptococcus agalactiae	4
GCA_900155855.1		Streptococcus agalactiae	4
GCA_900474905.1	NCTC11930	Streptococcus agalactiae	6
GCA_900475355.1	NCTC8187	Streptococcus agalactiae	5
GCA_900636375.1	NCTC8184	Streptococcus agalactiae	7
GCA_900638415.1	NCTC13949	Streptococcus agalactiae	4
GCA_900638495.1	NCTC13947	Streptococcus agalactiae	5
GCA_947313835.2		Streptococcus agalactiae	4
GCA_949787155.1		Streptococcus agalactiae	0
GCA_949787645.1		Streptococcus agalactiae	2
GCA_949787715.1		Streptococcus agalactiae	1
GCA_949788565.1		Streptococcus agalactiae	1
GCA_949788745.1		Streptococcus agalactiae	1
GCA_949788775.1		Streptococcus agalactiae	2
GCA_949788785.1		Streptococcus agalactiae	2
GCA_949788915.1		Streptococcus agalactiae	3
GCA_949788925.1		Streptococcus agalactiae	2
GCA_949788935.1		Streptococcus agalactiae	1
GCA_949788945.1		Streptococcus agalactiae	1
GCA_949789875.1		Streptococcus agalactiae	5
GCA_949790125.1		Streptococcus agalactiae	4
GCA_949790945.1		Streptococcus agalactiae	3
GCA_949791205.1		Streptococcus agalactiae	2
GCA_949792585.1		Streptococcus agalactiae	2
GCA_949793775.1		Streptococcus agalactiae	2
GCA_949794475.1		Streptococcus agalactiae	1
GCA_951392265.1		Streptococcus agalactiae	1
GCA_000007265.1	2603V/R	Streptococcus agalactiae	6
GCA_000012705.1	A909	Streptococcus agalactiae	7
GCA_000196055.1	NEM316	Streptococcus agalactiae	1
GCA_000299135.1	GD201008-001	Streptococcus agalactiae	5
GCA_000302475.3		Streptococcus agalactiae	0
GCA_000427035.1	09mas018883	Streptococcus agalactiae	2
GCA_000427055.1	ILRI112	Streptococcus agalactiae	1
GCA_000427075.1	ILRI005	Streptococcus agalactiae	3
GCA_000599965.1		Streptococcus agalactiae	0
GCA_027474505.1	LGM	Streptococcus alactolyticus	2
GCA_043507435.1	CGMH_KH1	Streptococcus anginosus	7
GCA_046603845.1		Streptococcus anginosus	0
GCA_050613235.1	980/01	Streptococcus anginosus	4
GCA_900636475.1	NCTC10713	Streptococcus anginosus	7
GCA_901542485.1	NCTC11064	Streptococcus anginosus	3
GCA_000463465.1	C1051	Streptococcus anginosus	4
GCA_000463505.1	C238	Streptococcus anginosus	13
GCA_000478925.1	MAS624	Streptococcus anginosus	11
GCA_000831165.1	SA1	Streptococcus anginosus	2
GCA_001412635.1	J4211	Streptococcus anginosus	8
GCA_001697145.1	J4206	Streptococcus anginosus	6
GCA_008726365.3	UMB8616	Streptococcus anginosus	10
GCA_008726525.2	UMB4708	Streptococcus anginosus	12
GCA_016725185.1	FDAARGOS_1155	Streptococcus anginosus	13
GCA_016903355.1	FDAARGOS_1357	Streptococcus anginosus	5
GCA_018919275.2	UMB1353	Streptococcus anginosus	5
GCA_020735765.1	FDAARGOS_1569	Streptococcus anginosus	7
GCA_021184285.1		Streptococcus anginosus	8
GCA_023169525.1	CCUG 27928	Streptococcus anginosus	7
GCA_029010215.1	VSI67	Streptococcus anginosus	8
GCA_029010275.1	VSI85	Streptococcus anginosus	14
GCA_029011235.1	VSI52	Streptococcus anginosus	10
GCA_029011295.1	VSI40	Streptococcus anginosus	9
GCA_029011355.1	VSI37	Streptococcus anginosus	10
GCA_029011615.1	VSI16	Streptococcus anginosus	8
GCA_029011695.1	VSI13	Streptococcus anginosus	5
GCA_029011905.1	VSI68	Streptococcus anginosus	9
GCA_029012025.1	VSI12	Streptococcus anginosus	5
GCA_036234475.2	UMB2693	Streptococcus anginosus	9
GCA_036236295.2	UMB3052	Streptococcus anginosus	16
GCA_900476055.1	NCTC13166	Streptococcus australis	2
GCA_900636505.1	NCTC3168	Streptococcus australis	3
GCA_901543175.1	NCTC5338	Streptococcus australis	4
GCA_900636575.1	NCTC12191	Streptococcus canis	9
GCA_901521425.1	B700072	Streptococcus canis	7
GCA_009738555.1	HL_100	Streptococcus canis	7
GCA_010993845.2	HL_77_2	Streptococcus canis	7
GCA_010993865.2	HL_98_2	Streptococcus canis	9
GCA_010993915.2	HL_77_1	Streptococcus canis	8
GCA_003086355.2	Z15	Streptococcus chenjunshii	3
GCA_019336935.2	11-6117	Streptococcus constellatus	4
GCA_023167545.1	CCUG 24889	Streptococcus constellatus	2
GCA_024399395.1	TCV107	Streptococcus constellatus	5
GCA_000463395.1	C232	Streptococcus constellatus	9
GCA_000463425.1	C1050	Streptococcus constellatus	10
GCA_000463445.1	C818	Streptococcus constellatus	9
GCA_016127875.1	FDAARGOS_1015	Streptococcus constellatus	7
GCA_016725005.1	FDAARGOS_1156	Streptococcus constellatus	2
GCA_016889885.1	FDAARGOS_1208	Streptococcus constellatus	10
GCA_000385925.1	AS 1.3089	Streptococcus cristatus	5
GCA_011612585.1	ATCC 51100	Streptococcus cristatus	2
GCA_900475445.1	NCTC12479	Streptococcus cristatus	3
GCA_900478185.1	NCTC13807	Streptococcus cristatus	5
GCA_015689435.1		Streptococcus equi subsp. equi	0
GCA_015689455.1	SEZ33	Streptococcus equi subsp. equi	3
GCA_015767535.1	SEZ36	Streptococcus equi subsp. equi	6
GCA_015767555.1	SEZ46	Streptococcus equi subsp. equi	7
GCA_018140535.1	IN-6992	Streptococcus equi subsp. equi	2
GCA_018604585.1		Streptococcus equi subsp. equi	5
GCA_018604605.1		Streptococcus equi subsp. equi	4
GCA_018604625.1	489_004	Streptococcus equi subsp. equi	4
GCA_018604645.1		Streptococcus equi subsp. equi	5
GCA_018604665.1	470_008	Streptococcus equi subsp. equi	4
GCA_018604685.1	470_007	Streptococcus equi subsp. equi	4
GCA_018604705.1		Streptococcus equi subsp. equi	4
GCA_018604725.1		Streptococcus equi subsp. equi	4
GCA_018604745.1	470_001	Streptococcus equi subsp. equi	5
GCA_019645895.1	B630793	Streptococcus equi subsp. equi	2
GCA_021029665.1	SEZ_14-145	Streptococcus equi subsp. equi	4
GCA_021029685.1	SEZ_18-036	Streptococcus equi subsp. equi	5
GCA_029910475.1	Kargaly-22	Streptococcus equi subsp. equi	4
GCA_030480405.1	BJ-1	Streptococcus equi subsp. equi	2
GCA_033036375.1	HTP133	Streptococcus equi subsp. equi	1
GCA_033036395.1	HTP232	Streptococcus equi subsp. equi	2
GCA_033036835.1	HT1112	Streptococcus equi subsp. equi	1
GCA_033037175.1	ZHZ211	Streptococcus equi subsp. equi	2
GCA_033037495.1	JMC111	Streptococcus equi subsp. equi	2
GCA_033037535.1	HT321	Streptococcus equi subsp. equi	6
GCA_033037575.1	XJ5012	Streptococcus equi subsp. equi	3
GCA_900474805.1	NCTC7022	Streptococcus equi subsp. equi	8
GCA_900474875.1	NCTC12090	Streptococcus equi subsp. equi	6
GCA_900475125.1	NCTC11606	Streptococcus equi subsp. equi	1
GCA_900475295.1	NCTC6176	Streptococcus equi subsp. equi	1
GCA_900475435.1	NCTC11824	Streptococcus equi subsp. equi	3
GCA_900636415.1	NCTC12091	Streptococcus equi subsp. equi	3
GCA_900636805.1	NCTC6180	Streptococcus equi subsp. equi	2
GCA_900637675.1	NCTC9682	Streptococcus equi subsp. equi	4
GCA_901472575.1	NCTC11854	Streptococcus equi subsp. equi	5
GCA_901542385.1	NCTC4675	Streptococcus equi subsp. equi	3
GCA_000020765.1	MGCS10565; ATCC BAA1716	Streptococcus equi subsp. equi	2
GCA_000026585.1	4047	Streptococcus equi subsp. equi	4
GCA_000026605.1	H70	Streptococcus equi subsp. equi	2
GCA_000219765.1	ATCC 35246	Streptococcus equi subsp. equi	4
GCA_000696505.1	CY	Streptococcus equi subsp. equi	3
GCA_002202295.1	ATCC 39506	Streptococcus equi subsp. equi	5
GCA_009676645.1	OH-71905	Streptococcus equi subsp. equi	3
GCA_009676685.2	TN-714097	Streptococcus equi subsp. equi	3
GCA_009676725.1	AZ-45470	Streptococcus equi subsp. equi	2
GCA_011316785.2		Streptococcus equi subsp. equi	0
GCA_015689355.1	SEZ18	Streptococcus equi subsp. equi	3
GCA_015689375.1	SEZ25	Streptococcus equi subsp. equi	3
GCA_015689395.1	SEZ13	Streptococcus equi subsp. equi	4
GCA_015689415.1	SEZ14	Streptococcus equi subsp. equi	5
GCA_900636465.1	NCTC8140	Streptococcus equinus	1
GCA_900636565.1	NCTC10389	Streptococcus equinus	4
GCA_901543475.1	NCTC8133	Streptococcus equinus	1
GCA_002073515.2	FDAARGOS_251	Streptococcus equinus	2
GCA_009758075.1	CNU 77-23	Streptococcus equinus	2
GCA_009758095.1	CNU G6	Streptococcus equinus	2
GCA_014041875.1	MDC1	Streptococcus equinus	2
GCA_016906125.1		Streptococcus equinus	0
GCA_022810625.1	SheepZ001	Streptococcus equinus	1
GCA_024732405.1	S1	Streptococcus equinus	1
GCA_048820335.1		Streptococcus equinus	0
GCA_049393735.1	NM-7	Streptococcus equinus	1
GCA_049393745.1	NM-L6	Streptococcus equinus	4
GCA_049393755.1	NM-L9	Streptococcus equinus	1
GCA_049393765.1		Streptococcus equinus	0
GCA_049393805.1	NM-A1	Streptococcus equinus	3
GCA_049560825.1	Q6	Streptococcus equinus	2
GCA_900475025.1	NCTC12278	Streptococcus ferus	2
GCA_965275805.1		Streptococcus gallolyticus	2
GCA_000027185.1	UCN34	Streptococcus gallolyticus	5
GCA_000203195.1	ATCC BAA-2069	Streptococcus gallolyticus	9
GCA_000270145.1	ATCC 43143	Streptococcus gallolyticus	5
GCA_001477575.1	ICDDRB-NRC-S1	Streptococcus gallolyticus	3
GCA_002000985.1	DSM 16831	Streptococcus gallolyticus	7
GCA_012273095.1		Streptococcus gallolyticus	4
GCA_013267695.1	FDAARGOS_755	Streptococcus gallolyticus	4
GCA_019021805.1	TX20005	Streptococcus gallolyticus	4
GCA_027474865.2	XH2168	Streptococcus gallolyticus	6
GCA_050562185.1	202	Streptococcus gallolyticus	6
GCA_900475715.1	NCTC13773	Streptococcus gallolyticus	7
GCA_965275735.1		Streptococcus gallolyticus	2
GCA_965275775.1		Streptococcus gallolyticus	3
GCA_965275785.1		Streptococcus gallolyticus	2
GCA_965275795.1		Streptococcus gallolyticus	2
GCA_900636555.1	NCTC7868	Streptococcus gordonii	1
GCA_901543415.1		Streptococcus gordonii	0
GCA_901544385.1	NCTC10231	Streptococcus gordonii	1
GCA_000017005.1	Challis substr. CH1	Streptococcus gordonii	1
GCA_000970665.2	IE35	Streptococcus gordonii	1
GCA_001281105.1	KCOM 1506 (= ChDC B679)	Streptococcus gordonii	4
GCA_002073435.2	FDAARGOS_257	Streptococcus gordonii	1
GCA_002386285.1	FDAARGOS_371	Streptococcus gordonii	3
GCA_009730535.1	FDAARGOS_683	Streptococcus gordonii	1
GCA_019046945.1	FDAARGOS 1454	Streptococcus gordonii	1
GCA_019047505.1	FDAARGOS 1455	Streptococcus gordonii	3
GCA_019449375.2		Streptococcus gordonii	0
GCA_026810185.1		Streptococcus gordonii	2
GCA_900475015.1		Streptococcus gordonii	0
GCA_900475385.1	NCTC3165	Streptococcus gordonii	3
GCA_003627155.1	ChDC B345	Streptococcus gwangjuense	4
GCA_019774635.1	Shali_VAS-CPH	Streptococcus halichoeri	1
GCA_001598035.1	HTS9	Streptococcus halotolerans	3
GCA_041081565.1	S23-3001-2	Streptococcus hillyeri	7
GCA_041081655.1	S23-3001-1	Streptococcus hillyeri	7
GCA_001708305.1	HTS2	Streptococcus himalayensis	4
GCA_000479315.1	I-P16	Streptococcus ilei	1
GCA_000479335.1	I-G2	Streptococcus ilei	2
GCA_000246835.1	CJ18	Streptococcus infantarius	5
GCA_001477615.1	ICDDRB-NRC-S5	Streptococcus infantarius	4
GCA_016127275.1	FDAARGOS_1019	Streptococcus infantarius	4
GCA_032618495.1	Si 4-21	Streptococcus iniae	1
GCA_032619275.1	Si 1-19	Streptococcus iniae	1
GCA_032623075.1	CB Si-1	Streptococcus iniae	1
GCA_032624055.1	Si 8-21	Streptococcus iniae	1
GCA_040782655.1	QMA0445	Streptococcus iniae	4
GCA_040782665.1	QMA0462	Streptococcus iniae	1
GCA_040782825.1	QMA0139	Streptococcus iniae	4
GCA_040782835.1		Streptococcus iniae	0
GCA_040782845.1	QMA0177	Streptococcus iniae	2
GCA_040782855.1	QMA0139_CTAB	Streptococcus iniae	5
GCA_040783505.1		Streptococcus iniae	8
GCA_040930395.1	ZQ2205	Streptococcus iniae	2
GCA_046581345.1		Streptococcus iniae	1
GCA_000403625.1	SF1	Streptococcus iniae	4
GCA_000648525.1	ISET0901	Streptococcus iniae	2
GCA_000648555.1	ISNO	Streptococcus iniae	2
GCA_000831485.1	YSFST01-82	Streptococcus iniae	2
GCA_001885145.1	89353	Streptococcus iniae	1
GCA_002220115.1	QMA0248	Streptococcus iniae	3
GCA_002787125.1	FP5228	Streptococcus iniae	2
GCA_003589905.1	GX005	Streptococcus iniae	1
GCA_003589945.1	YM011	Streptococcus iniae	1
GCA_030020365.1	DFSM220524	Streptococcus iniae	2
GCA_030020405.1	GXAS200705	Streptococcus iniae	7
GCA_030582735.1	LSSM211007SI	Streptococcus iniae	2
GCA_030732225.1	BH15-2	Streptococcus iniae	3
GCA_030732245.1	BH16-24	Streptococcus iniae	3
GCA_032616015.1	Si 7-21	Streptococcus iniae	1
GCA_032616875.1	Si 6-21	Streptococcus iniae	1
GCA_032617675.1	P3SAB	Streptococcus iniae	1
GCA_032937075.1	XH2169	Streptococcus intermedius	7
GCA_900475975.1	NCTC11324	Streptococcus intermedius	2
GCA_000306805.1	JTH08	Streptococcus intermedius	2
GCA_000463355.1	B196	Streptococcus intermedius	5
GCA_000463385.1	C270	Streptococcus intermedius	5
GCA_001296205.1	KCOM 1545	Streptococcus intermedius	4
GCA_002073355.2	FDAARGOS_233	Streptococcus intermedius	3
GCA_002356055.1	TYG1620	Streptococcus intermedius	1
GCA_013267515.1	FDAARGOS_769	Streptococcus intermedius	3
GCA_003627135.1	JS71	Streptococcus koreensis	2
GCA_900635935.1	NCTC11436	Streptococcus lutetiensis	4
GCA_901543605.1	NCTC8796	Streptococcus lutetiensis	1
GCA_000441535.1	033	Streptococcus lutetiensis	5
GCA_016403165.1		Streptococcus lutetiensis	3
GCA_016725165.1	FDAARGOS_1158	Streptococcus lutetiensis	1
GCA_900475065.1	NCTC8738	Streptococcus lutetiensis	2
GCA_900475675.1	NCTC13774	Streptococcus lutetiensis	1
GCA_000283635.1	ACA-DC 198	Streptococcus macedonicus	1
GCA_026194135.2	E37	Streptococcus macedonicus	5
GCA_029866925.1	SGM CIP105683	Streptococcus macedonicus	8
GCA_900187085.1	NCTC13788	Streptococcus merionis	1
GCA_900636525.1	NCTC11169	Streptococcus milleri	3
GCA_900636715.1	NCTC10708	Streptococcus milleri	6
GCA_031191225.1		Streptococcus mitis	0
GCA_965111695.1		Streptococcus mitis	7
GCA_965111705.1		Streptococcus mitis	1
GCA_965111715.1		Streptococcus mitis	3
GCA_965111725.1		Streptococcus mitis	4
GCA_965111735.1		Streptococcus mitis	6
GCA_965111745.1		Streptococcus mitis	3
GCA_000027165.1	B6	Streptococcus mitis	6
GCA_000148585.3	NCTC 12261	Streptococcus mitis	1
GCA_000722765.2	SK637	Streptococcus mitis	2
GCA_001281025.1	KCOM 1350 (= ChDC B183)	Streptococcus mitis	1
GCA_001560895.1	SVGS_061	Streptococcus mitis	9
GCA_009730515.1	FDAARGOS_684	Streptococcus mitis	1
GCA_013305725.1	S022-V3-A4	Streptococcus mitis	4
GCA_014467095.1	Nm-65	Streptococcus mitis	5
GCA_016658865.1	S022-V7-A3	Streptococcus mitis	3
GCA_018603625.2	E651	Streptococcus mitis	2
GCA_018603945.2	14-4881	Streptococcus mitis	2
GCA_018985535.2	E689	Streptococcus mitis	4
GCA_019047825.1	FDAARGOS 1456	Streptococcus mitis	1
GCA_019336965.2	E647	Streptococcus mitis	3
GCA_011765525.1	P6	Streptococcus mutans	3
GCA_011765545.1	P1	Streptococcus mutans	3
GCA_012273155.1		Streptococcus mutans	1
GCA_014621675.1	B04Sm5	Streptococcus mutans	2
GCA_014842815.3		Streptococcus mutans	0
GCA_018619415.2	E681	Streptococcus mutans	1
GCA_019048645.1	FDAARGOS 1458	Streptococcus mutans	1
GCA_019856215.1		Streptococcus mutans	1
GCA_024762155.1		Streptococcus mutans	0
GCA_024762175.1	COCC33-14R	Streptococcus mutans	1
GCA_024762195.1	COCC33-14	Streptococcus mutans	1
GCA_030294905.1	LP13	Streptococcus mutans	2
GCA_040733935.1		Streptococcus mutans	0
GCA_040733985.1		Streptococcus mutans	0
GCA_043289825.1		Streptococcus mutans	0
GCA_044360185.1	LMG 14558	Streptococcus mutans	1
GCA_044740735.1		Streptococcus mutans	0
GCA_048568285.1	Xc	Streptococcus mutans	1
GCA_900475095.1	NCTC10449	Streptococcus mutans	1
GCA_900636835.1		Streptococcus mutans	0
GCA_900638045.1	NCTC10920	Streptococcus mutans	1
GCA_000007465.2		Streptococcus mutans	0
GCA_000091645.1	NN2025	Streptococcus mutans	2
GCA_000271865.1	GS-5	Streptococcus mutans	1
GCA_000284575.1		Streptococcus mutans	0
GCA_000817065.1		Streptococcus mutans	0
GCA_001558215.1		Streptococcus mutans	0
GCA_002155285.1		Streptococcus mutans	1
GCA_002995555.1	LAR01	Streptococcus mutans	2
GCA_003691695.1	LAB761	Streptococcus mutans	1
GCA_006739205.1	NBRC 13955	Streptococcus mutans	1
GCA_008831325.1	MD	Streptococcus mutans	1
GCA_008831345.1	T8	Streptococcus mutans	1
GCA_008831365.1	UA140	Streptococcus mutans	3
GCA_009738105.1	NCH105	Streptococcus mutans	1
GCA_011765485.1	S4	Streptococcus mutans	3
GCA_011765505.1	S1	Streptococcus mutans	3
GCA_018985475.2	E684	Streptococcus oralis	2
GCA_018985495.2	E734	Streptococcus oralis	4
GCA_019334565.1	34	Streptococcus oralis	2
GCA_019458035.2	E665	Streptococcus oralis	2
GCA_021497885.1	SOD	Streptococcus oralis	2
GCA_021497945.1	SOT	Streptococcus oralis	4
GCA_022749195.1	1648	Streptococcus oralis	2
GCA_023611505.1	HP01	Streptococcus oralis	5
GCA_024399415.1		Streptococcus oralis	0
GCA_900637025.1	NCTC11427	Streptococcus oralis	2
GCA_963669195.1		Streptococcus oralis	2
GCA_965111685.1		Streptococcus oralis	3
GCA_000253155.1	Uo5	Streptococcus oralis	2
GCA_001983955.1	S.MIT/ORALIS-351	Streptococcus oralis	3
GCA_002356415.1	osk_001	Streptococcus oralis	3
GCA_002386345.1	FDAARGOS_367	Streptococcus oralis	3
GCA_007475365.1	F0392	Streptococcus oralis	2
GCA_013488045.1		Streptococcus oralis	5
GCA_013488065.1		Streptococcus oralis	2
GCA_016028175.1	FDAARGOS_886	Streptococcus oralis	1
GCA_016028255.1	FDAARGOS_885	Streptococcus oralis	2
GCA_016127555.1	FDAARGOS_1020	Streptococcus oralis	2
GCA_016127735.1	FDAARGOS_1075	Streptococcus oralis	2
GCA_016127915.1	FDAARGOS_1021	Streptococcus oralis	1
GCA_016549395.1	SF100	Streptococcus oralis	2
GCA_016888845.1	SF100	Streptococcus oralis	1
GCA_018195655.2	E619	Streptococcus oralis	4
GCA_018448725.2	E628	Streptococcus oralis	4
GCA_018448775.2	E649	Streptococcus oralis	4
GCA_018619395.2	E664	Streptococcus oralis	2
GCA_018137985.1	HKU75	Streptococcus oriscaviae	6
GCA_001642085.1		Streptococcus pantholopis	0
GCA_037076355.1	SP4011	Streptococcus parapneumoniae	10
GCA_031582885.1	B-1756	Streptococcus parasanguinis	2
GCA_032163505.1	30.8.10	Streptococcus parasanguinis	2
GCA_000164675.2	ATCC 15912	Streptococcus parasanguinis	3
GCA_000262145.1	FW213	Streptococcus parasanguinis	3
GCA_018619375.2	E669	Streptococcus parasanguinis	3
GCA_029542045.1	SFJ45	Streptococcus parasuis	2
GCA_030378185.1	7500	Streptococcus parasuis	5
GCA_033344055.1	221006	Streptococcus parasuis	1
GCA_043099355.1	FZ1	Streptococcus parasuis	1
GCA_043099365.1	FZ2	Streptococcus parasuis	3
GCA_044361625.1	1628469	Streptococcus parasuis	8
GCA_048315825.1	NX1	Streptococcus parasuis	3
GCA_018986875.1	H35	Streptococcus parasuis	5
GCA_019076885.1	BS26	Streptococcus parasuis	3
GCA_021654435.1	SUT-7	Streptococcus parasuis	4
GCA_021654455.1	SUT-286	Streptococcus parasuis	5
GCA_021654475.1	SUT-380	Streptococcus parasuis	6
GCA_021654495.1	SUT-503	Streptococcus parasuis	1
GCA_028751645.1	NN1	Streptococcus parasuis	4
GCA_028752615.1	SS20	Streptococcus parasuis	1
GCA_028752635.1	SS17	Streptococcus parasuis	1
GCA_043705335.1	DB-M9	Streptococcus parauberis	4
GCA_043705905.1	DB-M11	Streptococcus parauberis	3
GCA_043706535.1	DB-M18	Streptococcus parauberis	3
GCA_043707145.1	DB-M23	Streptococcus parauberis	3
GCA_043707715.1	DB-M17	Streptococcus parauberis	3
GCA_000187935.2	NCFD 2020	Streptococcus parauberis	8
GCA_000213825.1	KCTC 11537	Streptococcus parauberis	6
GCA_002900385.1	SPOF3K	Streptococcus parauberis	7
GCA_025152645.1	KSP10	Streptococcus parauberis	6
GCA_025152665.1	KSP14	Streptococcus parauberis	6
GCA_025152685.1	KSP20	Streptococcus parauberis	8
GCA_025201235.1	HFTC0064	Streptococcus parauberis	7
GCA_029223665.1	SPOF21J2	Streptococcus parauberis	4
GCA_029223685.1	SPOF21J26	Streptococcus parauberis	5
GCA_029223705.1	SPOF19J15	Streptococcus parauberis	3
GCA_029223725.1	KSP45	Streptococcus parauberis	6
GCA_032880625.1	KRS02083	Streptococcus parauberis	8
GCA_043702715.1	DB-WT	Streptococcus parauberis	3
GCA_043703385.1	DB-M1	Streptococcus parauberis	3
GCA_043704035.1	DB-M3	Streptococcus parauberis	4
GCA_043704665.1	DB-M5	Streptococcus parauberis	4
GCA_900478025.1	NCTC13784	Streptococcus pasteurianus	8
GCA_000270165.1	ATCC 43144	Streptococcus pasteurianus	3
GCA_004843545.1	WUSP067	Streptococcus pasteurianus	6
GCA_023161985.2	WUSP070	Streptococcus pasteurianus	7
GCA_023162015.2	WUSP074	Streptococcus pasteurianus	7
GCA_033100235.1	WUSP082	Streptococcus pasteurianus	9
GCA_042854115.1	k46-0107-A9	Streptococcus pasteurianus	9
GCA_050563445.1	205	Streptococcus pasteurianus	6
GCA_003963555.1	KCOM 2412	Streptococcus periodonticum	6
GCA_032611355.1	SP21-2	Streptococcus pluranimalium	2
GCA_040801805.1	SS-15	Streptococcus pluranimalium	1
GCA_002953735.1	TH11417	Streptococcus pluranimalium	2
GCA_003352995.1	14A0014	Streptococcus pluranimalium	6
GCA_019265225.1		Streptococcus pluranimalium	0
GCA_029625395.1	SP28	Streptococcus pluranimalium	6
GCA_000211055.2	SNP994039	Streptococcus pneumoniae	1
GCA_000211075.1	SPN032672	Streptococcus pneumoniae	1
GCA_000211095.1	SPN033038	Streptococcus pneumoniae	1
GCA_000251085.2	ST556	Streptococcus pneumoniae	5
GCA_000273445.1	TIGR4	Streptococcus pneumoniae	1
GCA_000299015.1	gamPNI0373	Streptococcus pneumoniae	1
GCA_000348705.1		Streptococcus pneumoniae	1
GCA_000494795.1		Streptococcus pneumoniae	3
GCA_000817005.1	NT_110_58	Streptococcus pneumoniae	8
GCA_001095405.3	PT8105	Streptococcus pneumoniae	2
GCA_001255215.1	A66	Streptococcus pneumoniae	2
GCA_001457635.1	NCTC7465	Streptococcus pneumoniae	1
GCA_001677235.1		Streptococcus pneumoniae	3
GCA_001715525.2		Streptococcus pneumoniae	0
GCA_001715565.2		Streptococcus pneumoniae	1
GCA_001896045.1	SP49	Streptococcus pneumoniae	4
GCA_001896065.1	SP61	Streptococcus pneumoniae	3
GCA_001896085.1	SP64	Streptococcus pneumoniae	3
GCA_001902455.1	SWU02	Streptococcus pneumoniae	1
GCA_002076835.1		Streptococcus pneumoniae	4
GCA_002076855.1		Streptococcus pneumoniae	4
GCA_002357995.1	KK0981	Streptococcus pneumoniae	3
GCA_002358015.1		Streptococcus pneumoniae	2
GCA_002358035.1		Streptococcus pneumoniae	3
GCA_002813535.1	BHN97x	Streptococcus pneumoniae	2
GCA_002813955.1	11A	Streptococcus pneumoniae	3
GCA_002843545.1	Xen35	Streptococcus pneumoniae	1
GCA_002947575.1	335	Streptococcus pneumoniae	5
GCA_003003495.1		Streptococcus pneumoniae	0
GCA_003044325.1		Streptococcus pneumoniae	2
GCA_003351525.1	M23734	Streptococcus pneumoniae	1
GCA_003351645.1	M16808	Streptococcus pneumoniae	1
GCA_003351705.1	M26365	Streptococcus pneumoniae	4
GCA_003351725.1		Streptococcus pneumoniae	0
GCA_003354825.1	SPN XDR SMC1710-32	Streptococcus pneumoniae	3
GCA_003367435.1		Streptococcus pneumoniae	1
GCA_003609935.1	MDRSPN001	Streptococcus pneumoniae	3
GCA_003966485.1	ATCC 49619	Streptococcus pneumoniae	3
GCA_003966505.1	HU-OH	Streptococcus pneumoniae	3
GCA_003966525.1	NU83127	Streptococcus pneumoniae	2
GCA_003967155.2	ASP0581	Streptococcus pneumoniae	5
GCA_003994915.1	HKU1-14	Streptococcus pneumoniae	3
GCA_004291255.1		Streptococcus pneumoniae	0
GCA_004331935.1		Streptococcus pneumoniae	0
GCA_008253725.1		Streptococcus pneumoniae	0
GCA_009664475.1	AUSMDU00010538	Streptococcus pneumoniae	2
GCA_011694695.1	PZ900701590	Streptococcus pneumoniae	2
GCA_012955565.1		Streptococcus pneumoniae	1
GCA_013047165.1	6A-10	Streptococcus pneumoniae	2
GCA_015838875.1	310	Streptococcus pneumoniae	3
GCA_015839035.1	475	Streptococcus pneumoniae	4
GCA_015839235.1	521	Streptococcus pneumoniae	3
GCA_015839415.1	525	Streptococcus pneumoniae	4
GCA_015839575.1	566	Streptococcus pneumoniae	3
GCA_015839775.1	573	Streptococcus pneumoniae	3
GCA_015839915.1	574	Streptococcus pneumoniae	3
GCA_015840115.1	563	Streptococcus pneumoniae	3
GCA_016653535.1		Streptococcus pneumoniae	1
GCA_017569245.1	BVJ1JL	Streptococcus pneumoniae	3
GCA_018336875.1		Streptococcus pneumoniae	0
GCA_019454385.1		Streptococcus pneumoniae	0
GCA_019456615.1		Streptococcus pneumoniae	0
GCA_019915285.1	SCAID PHRX1-2021	Streptococcus pneumoniae	2
GCA_020008085.1	B1900	Streptococcus pneumoniae	1
GCA_020097335.1	FDAARGOS_1508	Streptococcus pneumoniae	2
GCA_020177465.2	HAC 39-1996	Streptococcus pneumoniae	2
GCA_021398235.1	19A-19087	Streptococcus pneumoniae	5
GCA_021398265.1	19A-19343	Streptococcus pneumoniae	6
GCA_021398285.1	19A-19339	Streptococcus pneumoniae	6
GCA_022068225.1	TVO_TIGR4	Streptococcus pneumoniae	1
GCA_022068245.1	TVO_Taiwan19F-14	Streptococcus pneumoniae	4
GCA_022068265.1	TVO_1901928	Streptococcus pneumoniae	3
GCA_022068285.1	TVO_1901927	Streptococcus pneumoniae	4
GCA_022068405.1	TVO_1901926	Streptococcus pneumoniae	3
GCA_022068525.1	TVO_1901925	Streptococcus pneumoniae	1
GCA_022068645.1	TVO_1901924	Streptococcus pneumoniae	1
GCA_022068765.1	TVO_1901923	Streptococcus pneumoniae	1
GCA_022068885.1	TVO_1901922	Streptococcus pneumoniae	2
GCA_022069005.1	TVO_1901948	Streptococcus pneumoniae	1
GCA_022069085.1	TVO_1901947	Streptococcus pneumoniae	1
GCA_022069205.1	TVO_1901946	Streptococcus pneumoniae	1
GCA_022069325.1	TVO_1901945	Streptococcus pneumoniae	4
GCA_022069445.1	TVO_1901943	Streptococcus pneumoniae	1
GCA_022069485.1		Streptococcus pneumoniae	0
GCA_022069505.1		Streptococcus pneumoniae	0
GCA_022069545.1	TVO_1901939	Streptococcus pneumoniae	1
GCA_022069645.1	TVO_1901921	Streptococcus pneumoniae	4
GCA_022069785.1	TVO_1901938	Streptococcus pneumoniae	1
GCA_022069905.1	TVO_1901935	Streptococcus pneumoniae	2
GCA_022070005.1	TVO_1901934	Streptococcus pneumoniae	3
GCA_022070145.1		Streptococcus pneumoniae	3
GCA_022070225.1	TVO_1901932	Streptococcus pneumoniae	2
GCA_022070365.1		Streptococcus pneumoniae	2
GCA_022070425.1	TVO_1901930	Streptococcus pneumoniae	4
GCA_022070465.1	TVO_1901920	Streptococcus pneumoniae	3
GCA_022070485.1	TVO_1902277	Streptococcus pneumoniae	4
GCA_022070505.1		Streptococcus pneumoniae	0
GCA_022070545.1	TVO_1902276	Streptococcus pneumoniae	5
GCA_022070565.1	TVO_1902282	Streptococcus pneumoniae	2
GCA_022075545.1		Streptococcus pneumoniae	0
GCA_022075645.1	TVO_1901944	Streptococcus pneumoniae	3
GCA_022075745.1	TVO_1901929	Streptococcus pneumoniae	3
GCA_022318385.1		Streptococcus pneumoniae	0
GCA_022318405.1	CH2241	Streptococcus pneumoniae	1
GCA_022318425.1		Streptococcus pneumoniae	0
GCA_022318445.1		Streptococcus pneumoniae	0
GCA_022318465.1	ND6401	Streptococcus pneumoniae	1
GCA_022318485.1	NP7513	Streptococcus pneumoniae	1
GCA_022318505.1	NP7536	Streptococcus pneumoniae	1
GCA_022318525.1	PT8465	Streptococcus pneumoniae	2
GCA_022318545.1		Streptococcus pneumoniae	0
GCA_022558605.1	PZ900700608	Streptococcus pneumoniae	5
GCA_024089335.1	TIGR4	Streptococcus pneumoniae	1
GCA_024089355.1	SN75752	Streptococcus pneumoniae	3
GCA_024703115.1		Streptococcus pneumoniae	0
GCA_025136435.1	19A-ST320_99-176	Streptococcus pneumoniae	3
GCA_025643295.1	Sep-38	Streptococcus pneumoniae	4
GCA_025643315.1	3641/15	Streptococcus pneumoniae	2
GCA_026625945.1	NP1	Streptococcus pneumoniae	7
GCA_026625965.1	NP2	Streptococcus pneumoniae	7
GCA_026683915.1	BC2	Streptococcus pneumoniae	3
GCA_026683935.1	BC1	Streptococcus pneumoniae	4
GCA_027563115.1	SP007	Streptococcus pneumoniae	3
GCA_027943765.1	PZ900700617	Streptococcus pneumoniae	2
GCA_027943785.1	PZ900700792	Streptococcus pneumoniae	3
GCA_027943805.1	PZ900701057	Streptococcus pneumoniae	1
GCA_027943825.1	Utah_35B-24	Streptococcus pneumoniae	2
GCA_027943845.1	PZ900700204	Streptococcus pneumoniae	1
GCA_028865625.1		Streptococcus pneumoniae	2
GCA_028865775.1		Streptococcus pneumoniae	2
GCA_028865905.1		Streptococcus pneumoniae	4
GCA_028866055.1		Streptococcus pneumoniae	3
GCA_028866195.1		Streptococcus pneumoniae	3
GCA_028866365.1		Streptococcus pneumoniae	1
GCA_028866515.1		Streptococcus pneumoniae	1
GCA_028866675.1		Streptococcus pneumoniae	1
GCA_028866875.1		Streptococcus pneumoniae	2
GCA_028867005.1		Streptococcus pneumoniae	1
GCA_030028375.1	105_Kz	Streptococcus pneumoniae	1
GCA_030127445.1	BM6001	Streptococcus pneumoniae	9
GCA_030142535.1		Streptococcus pneumoniae	1
GCA_030717745.1	H1900	Streptococcus pneumoniae	1
GCA_030717785.1	L1900	Streptococcus pneumoniae	1
GCA_032883655.1	ATCC 700671	Streptococcus pneumoniae	2
GCA_033096025.1	PZ900700003	Streptococcus pneumoniae	3
GCA_033096045.1	PZ900700005	Streptococcus pneumoniae	3
GCA_033096065.1	PZ900700006	Streptococcus pneumoniae	3
GCA_033096085.1	PZ900700007	Streptococcus pneumoniae	3
GCA_033096105.1	PZ900700009	Streptococcus pneumoniae	4
GCA_033096125.1	PZ900700012	Streptococcus pneumoniae	4
GCA_033096145.1	PZ900700014	Streptococcus pneumoniae	4
GCA_033096165.1	PZ900700027	Streptococcus pneumoniae	3
GCA_033096185.1	PZ900700038	Streptococcus pneumoniae	2
GCA_033096205.1	PZ900700054	Streptococcus pneumoniae	4
GCA_033096225.1	PZ900700063	Streptococcus pneumoniae	6
GCA_033096245.1	PZ900700097	Streptococcus pneumoniae	3
GCA_033096265.1	PZ900700119	Streptococcus pneumoniae	6
GCA_033096285.1	PZ900700178	Streptococcus pneumoniae	3
GCA_033096305.1	PZ900700406	Streptococcus pneumoniae	5
GCA_033096325.1	PZ900701114	Streptococcus pneumoniae	3
GCA_033096345.1	PZ900701208	Streptococcus pneumoniae	2
GCA_033096365.1	PZ900701541	Streptococcus pneumoniae	2
GCA_033096385.1	PZ900701549	Streptococcus pneumoniae	4
GCA_033100055.1	ST62	Streptococcus pneumoniae	1
GCA_033142835.1	21334	Streptococcus pneumoniae	2
GCA_033144075.1	16H2092	Streptococcus pneumoniae	1
GCA_033144835.1	16P4028	Streptococcus pneumoniae	1
GCA_033145555.1	LYP	Streptococcus pneumoniae	5
GCA_033146375.1	15H4024	Streptococcus pneumoniae	1
GCA_033147055.1	16H3071-2	Streptococcus pneumoniae	2
GCA_033147875.1	16P2012-2	Streptococcus pneumoniae	2
GCA_033148655.1	20824-4	Streptococcus pneumoniae	2
GCA_033149375.1		Streptococcus pneumoniae	0
GCA_033150235.1	16H2041	Streptococcus pneumoniae	1
GCA_033151055.1	17023	Streptococcus pneumoniae	1
GCA_033152035.1	15P3054	Streptococcus pneumoniae	1
GCA_033152795.1		Streptococcus pneumoniae	0
GCA_033165855.1	ZGX	Streptococcus pneumoniae	3
GCA_033166735.1	LM	Streptococcus pneumoniae	4
GCA_033167795.1		Streptococcus pneumoniae	0
GCA_033169215.1	OXT	Streptococcus pneumoniae	4
GCA_034422155.1		Streptococcus pneumoniae	0
GCA_034422215.1		Streptococcus pneumoniae	0
GCA_034422275.1		Streptococcus pneumoniae	0
GCA_034422335.1	15P2112	Streptococcus pneumoniae	2
GCA_034422635.1	UK34	Streptococcus pneumoniae	2
GCA_036322915.1	PF1	Streptococcus pneumoniae	3
GCA_036322935.1	PF2	Streptococcus pneumoniae	3
GCA_036322955.1	Pne2	Streptococcus pneumoniae	6
GCA_036322975.1	Pne3	Streptococcus pneumoniae	6
GCA_036322995.1	Pne4	Streptococcus pneumoniae	3
GCA_036323015.1	1-Sep	Streptococcus pneumoniae	2
GCA_036323035.1	2-Sep	Streptococcus pneumoniae	5
GCA_036323055.1		Streptococcus pneumoniae	0
GCA_036323075.1	4-Sep	Streptococcus pneumoniae	3
GCA_036323095.1	5-Sep	Streptococcus pneumoniae	3
GCA_036323375.1	21P20	Streptococcus pneumoniae	2
GCA_036509575.1	6-Sep	Streptococcus pneumoniae	4
GCA_038431325.1	2018N21-288	Streptococcus pneumoniae	1
GCA_038431465.1	2018C08-270	Streptococcus pneumoniae	3
GCA_038431575.1	2016C10-332	Streptococcus pneumoniae	3
GCA_038431685.1	2016S11-245	Streptococcus pneumoniae	3
GCA_038431715.1	2014S11-203	Streptococcus pneumoniae	2
GCA_038431725.1	2014C08-275	Streptococcus pneumoniae	3
GCA_038431755.1	2008C09-280	Streptococcus pneumoniae	3
GCA_038431765.1	2008C09-276	Streptococcus pneumoniae	2
GCA_038431775.1	2008C04-309	Streptococcus pneumoniae	2
GCA_038431785.1	2006C08-243	Streptococcus pneumoniae	2
GCA_040687855.1	SN36255	Streptococcus pneumoniae	2
GCA_040687865.1	SP264	Streptococcus pneumoniae	3
GCA_040687875.1	TL7/1993	Streptococcus pneumoniae	3
GCA_040687885.1	Spn1439-106	Streptococcus pneumoniae	2
GCA_040687895.1	DCC1476	Streptococcus pneumoniae	3
GCA_040687905.1	PJ755/1	Streptococcus pneumoniae	1
GCA_040687915.1	M264-3	Streptococcus pneumoniae	1
GCA_040687925.1	DP1322	Streptococcus pneumoniae	2
GCA_040687935.1	BHN418	Streptococcus pneumoniae	1
GCA_040687945.1	TIGR4	Streptococcus pneumoniae	1
GCA_040687955.1		Streptococcus pneumoniae	0
GCA_040687975.1		Streptococcus pneumoniae	5
GCA_041154395.1	16P28	Streptococcus pneumoniae	5
GCA_041154405.1	16P29	Streptococcus pneumoniae	5
GCA_041228315.1	serotype 4	Streptococcus pneumoniae	2
GCA_041720885.1		Streptococcus pneumoniae	0
GCA_041729265.1	FC1	Streptococcus pneumoniae	4
GCA_041937135.1		Streptococcus pneumoniae	0
GCA_041937145.1		Streptococcus pneumoniae	0
GCA_041937155.1	20234287	Streptococcus pneumoniae	1
GCA_041955655.1	6_2F1	Streptococcus pneumoniae	1
GCA_044879805.1	262	Streptococcus pneumoniae	1
GCA_048987475.1		Streptococcus pneumoniae	0
GCA_900475305.1		Streptococcus pneumoniae	0
GCA_900475515.1		Streptococcus pneumoniae	0
GCA_900475805.1	NCTC11902	Streptococcus pneumoniae	3
GCA_900476445.1	4041STDY6836167	Streptococcus pneumoniae	3
GCA_900476455.1	4041STDY6836169	Streptococcus pneumoniae	1
GCA_900476465.1	4041STDY6836170	Streptococcus pneumoniae	1
GCA_900476475.1	4041STDY6583227	Streptococcus pneumoniae	1
GCA_900476505.1	4041STDY6836166	Streptococcus pneumoniae	2
GCA_900618545.1	4496	Streptococcus pneumoniae	1
GCA_900618555.1		Streptococcus pneumoniae	0
GCA_900618575.1	180-2	Streptococcus pneumoniae	1
GCA_900618585.1	180-15	Streptococcus pneumoniae	1
GCA_900622505.2	4559	Streptococcus pneumoniae	1
GCA_900636585.1	NCTC12977	Streptococcus pneumoniae	3
GCA_900692485.1		Streptococcus pneumoniae	1
GCA_900692555.1		Streptococcus pneumoniae	5
GCA_900692565.1		Streptococcus pneumoniae	2
GCA_900692575.1		Streptococcus pneumoniae	2
GCA_900692585.1		Streptococcus pneumoniae	3
GCA_900692595.1		Streptococcus pneumoniae	2
GCA_900692605.1		Streptococcus pneumoniae	4
GCA_900692615.1		Streptococcus pneumoniae	5
GCA_900692625.1		Streptococcus pneumoniae	0
GCA_900692635.1		Streptococcus pneumoniae	2
GCA_900692645.1		Streptococcus pneumoniae	4
GCA_900692655.1		Streptococcus pneumoniae	5
GCA_900692675.1		Streptococcus pneumoniae	2
GCA_900692685.1		Streptococcus pneumoniae	2
GCA_900692695.1		Streptococcus pneumoniae	1
GCA_900692705.1		Streptococcus pneumoniae	6
GCA_900692715.1		Streptococcus pneumoniae	2
GCA_900692735.1		Streptococcus pneumoniae	3
GCA_900692745.1		Streptococcus pneumoniae	1
GCA_900692755.1		Streptococcus pneumoniae	2
GCA_900692765.1		Streptococcus pneumoniae	4
GCA_900692775.1		Streptococcus pneumoniae	2
GCA_900692785.1		Streptococcus pneumoniae	4
GCA_900692795.1		Streptococcus pneumoniae	5
GCA_900692815.1		Streptococcus pneumoniae	1
GCA_900692825.1		Streptococcus pneumoniae	7
GCA_900692835.1		Streptococcus pneumoniae	2
GCA_900692845.1		Streptococcus pneumoniae	3
GCA_900692855.1		Streptococcus pneumoniae	3
GCA_900692875.1		Streptococcus pneumoniae	5
GCA_900692885.1		Streptococcus pneumoniae	3
GCA_900692895.1		Streptococcus pneumoniae	2
GCA_900692905.1		Streptococcus pneumoniae	1
GCA_900692915.1		Streptococcus pneumoniae	6
GCA_900692925.1		Streptococcus pneumoniae	3
GCA_900692935.1	GPSC10 substr. ST2013	Streptococcus pneumoniae	3
GCA_900692955.1		Streptococcus pneumoniae	8
GCA_900692965.1		Streptococcus pneumoniae	1
GCA_900692975.1		Streptococcus pneumoniae	2
GCA_900692985.1		Streptococcus pneumoniae	4
GCA_900692995.1		Streptococcus pneumoniae	1
GCA_900693005.1		Streptococcus pneumoniae	4
GCA_900693025.1	2245STDY6178787	Streptococcus pneumoniae	7
GCA_900693035.1		Streptococcus pneumoniae	4
GCA_900693045.1		Streptococcus pneumoniae	4
GCA_900693055.1	GPSC18 substr. ST13	Streptococcus pneumoniae	2
GCA_900693065.1		Streptococcus pneumoniae	1
GCA_900693075.1	GPSC13 substr. ST473	Streptococcus pneumoniae	1
GCA_900693085.1		Streptococcus pneumoniae	1
GCA_900693115.1		Streptococcus pneumoniae	6
GCA_900795095.1		Streptococcus pneumoniae	2
GCA_900795115.1		Streptococcus pneumoniae	5
GCA_900795145.1		Streptococcus pneumoniae	4
GCA_900795155.1		Streptococcus pneumoniae	3
GCA_900795165.1		Streptococcus pneumoniae	5
GCA_900795205.1	GPSC55 substr. ST3774	Streptococcus pneumoniae	2
GCA_900795245.1		Streptococcus pneumoniae	2
GCA_900795265.1		Streptococcus pneumoniae	0
GCA_930986525.1	RMV7	Streptococcus pneumoniae	4
GCA_000006885.1	TIGR4; ATCC BAA-334	Streptococcus pneumoniae	1
GCA_000007045.1		Streptococcus pneumoniae	0
GCA_000014365.2		Streptococcus pneumoniae	0
GCA_000018965.1	70585	Streptococcus pneumoniae	1
GCA_000018985.1	JJA	Streptococcus pneumoniae	2
GCA_000019005.1	P1031	Streptococcus pneumoniae	3
GCA_000019025.1	Taiwan19F-14	Streptococcus pneumoniae	4
GCA_000019265.1	Hungary19A-6	Streptococcus pneumoniae	4
GCA_000019825.1	G54	Streptococcus pneumoniae	4
GCA_000019985.1	CGSP14	Streptococcus pneumoniae	5
GCA_000026665.1	ATCC 700669	Streptococcus pneumoniae	5
GCA_000146975.1	AP200	Streptococcus pneumoniae	4
GCA_000147095.1	670-6B	Streptococcus pneumoniae	5
GCA_000180515.2	A45	Streptococcus pneumoniae	6
GCA_000196595.1	TCH8431/19A	Streptococcus pneumoniae	4
GCA_000210935.1	INV200	Streptococcus pneumoniae	1
GCA_000210955.1	OXC141	Streptococcus pneumoniae	1
GCA_000210975.1	INV104	Streptococcus pneumoniae	1
GCA_000210995.1	SNP034156	Streptococcus pneumoniae	1
GCA_000211015.1	SNP034183	Streptococcus pneumoniae	1
GCA_000211035.2	SNP994038	Streptococcus pneumoniae	1
GCA_901553735.1	NCTC10925	Streptococcus porcinus	5
GCA_901553755.1	NCTC10924	Streptococcus porcinus	5
GCA_016906085.1		Streptococcus porcinus	0
GCA_016906105.1		Streptococcus porcinus	1
GCA_900475415.1	NCTC10999	Streptococcus porcinus	5
GCA_901542335.1	NCTC10710	Streptococcus porcinus	4
GCA_900637075.1	NCTC13786	Streptococcus pseudoporcinus	4
GCA_901542435.1	NCTC5385	Streptococcus pseudoporcinus	4
GCA_902141225.1	NCTC10228	Streptococcus pseudoporcinus	5
GCA_000250925.1	MGAS1882	Streptococcus pyogenes	2
GCA_000275625.1	HKU QMH11M0907901	Streptococcus pyogenes	5
GCA_000307535.1	A20	Streptococcus pyogenes	3
GCA_000349925.2	M1 476	Streptococcus pyogenes	3
GCA_000422045.1	HSC5	Streptococcus pyogenes	3
GCA_000732345.1		Streptococcus pyogenes	2
GCA_000732385.1	STAB901	Streptococcus pyogenes	2
GCA_000732425.1	STAB902	Streptococcus pyogenes	6
GCA_000743015.1	ATCC 19615	Streptococcus pyogenes	4
GCA_000756485.1	M23ND	Streptococcus pyogenes	4
GCA_000767505.1	7F7	Streptococcus pyogenes	2
GCA_000772185.1	HKU360	Streptococcus pyogenes	6
GCA_000772245.1	1E1	Streptococcus pyogenes	1
GCA_000993765.1	AP1	Streptococcus pyogenes	5
GCA_001014285.1	JRS4	Streptococcus pyogenes	3
GCA_001014305.1	D471	Streptococcus pyogenes	3
GCA_001019635.1	NGAS743	Streptococcus pyogenes	4
GCA_001019675.1	NGAS596	Streptococcus pyogenes	2
GCA_001019695.1	NGAS327	Streptococcus pyogenes	1
GCA_001020185.2	M28PF1	Streptococcus pyogenes	6
GCA_001021955.1	5448	Streptococcus pyogenes	3
GCA_001023495.1	STAB10015	Streptococcus pyogenes	6
GCA_001039695.2		Streptococcus pyogenes	0
GCA_001051095.1	HKU488	Streptococcus pyogenes	6
GCA_001267805.1	NGAS322	Streptococcus pyogenes	5
GCA_001267845.1	NGAS638	Streptococcus pyogenes	3
GCA_001535505.1	MEW427	Streptococcus pyogenes	4
GCA_001535565.1	MEW123	Streptococcus pyogenes	4
GCA_001547715.1	JRS4	Streptococcus pyogenes	3
GCA_001547815.1	MTB313	Streptococcus pyogenes	2
GCA_001547835.1	MTB314	Streptococcus pyogenes	2
GCA_001559175.2	FDAARGOS_149	Streptococcus pyogenes	3
GCA_001620285.1	AP53	Streptococcus pyogenes	5
GCA_001635895.1	MGAS11027	Streptococcus pyogenes	2
GCA_001635935.1		Streptococcus pyogenes	0
GCA_001635975.1	MGAS27061	Streptococcus pyogenes	1
GCA_001638845.2	NS53	Streptococcus pyogenes	2
GCA_001640945.2		Streptococcus pyogenes	5
GCA_001678885.1	STAB09014	Streptococcus pyogenes	6
GCA_002055535.1	NCTC8198	Streptococcus pyogenes	5
GCA_002163545.1	STAB14018	Streptococcus pyogenes	4
GCA_002236855.1	GURSA1	Streptococcus pyogenes	5
GCA_002236875.1	GUR	Streptococcus pyogenes	5
GCA_002238295.1	STAB090229	Streptococcus pyogenes	3
GCA_002238315.1	STAB120304	Streptococcus pyogenes	4
GCA_002355175.1	M3-b	Streptococcus pyogenes	6
GCA_002355815.1	JMUB1235	Streptococcus pyogenes	1
GCA_002557755.1	HarveyGAS	Streptococcus pyogenes	5
GCA_002844355.1	JS12	Streptococcus pyogenes	3
GCA_003025365.1	TJ11-001	Streptococcus pyogenes	4
GCA_003203475.1	NGAS979	Streptococcus pyogenes	2
GCA_003352145.1	DMG1800716	Streptococcus pyogenes	4
GCA_003609955.1	KS030	Streptococcus pyogenes	6
GCA_003640605.1	SASM4-Duke	Streptococcus pyogenes	5
GCA_003698205.1	ABC020055975	Streptococcus pyogenes	5
GCA_003812645.1	FDAARGOS_534	Streptococcus pyogenes	3
GCA_003812725.1	FDAARGOS_514	Streptococcus pyogenes	6
GCA_003814365.1	Duke-Large	Streptococcus pyogenes	5
GCA_003814385.1	RLGH	Streptococcus pyogenes	5
GCA_004010855.1	MGAS27961	Streptococcus pyogenes	5
GCA_004010875.1	MGAS28085	Streptococcus pyogenes	5
GCA_004028355.1	CCUG 4207	Streptococcus pyogenes	5
GCA_004123995.1	TSPY155	Streptococcus pyogenes	5
GCA_004124015.1	TSPY556	Streptococcus pyogenes	3
GCA_004124075.1	TSPY453	Streptococcus pyogenes	7
GCA_004124115.1	TSPY208	Streptococcus pyogenes	5
GCA_004124135.1	TSPY165	Streptococcus pyogenes	4
GCA_004135875.1	M75	Streptococcus pyogenes	3
GCA_004153945.1	MGAS8347	Streptococcus pyogenes	4
GCA_004153965.1	MGAS10786	Streptococcus pyogenes	7
GCA_004153985.1	MGAS7914	Streptococcus pyogenes	6
GCA_004154005.1	MGAS7888	Streptococcus pyogenes	6
GCA_004154025.1	MGAS29409	Streptococcus pyogenes	4
GCA_004154045.1	MGAS29326	Streptococcus pyogenes	6
GCA_004154065.1	MGAS29284	Streptococcus pyogenes	8
GCA_004154085.1	MGAS28746	Streptococcus pyogenes	5
GCA_004154105.1	MGAS28686	Streptococcus pyogenes	6
GCA_004154125.1	MGAS28669	Streptococcus pyogenes	7
GCA_004154145.1	MGAS28650	Streptococcus pyogenes	4
GCA_004154165.1	MGAS28533	Streptococcus pyogenes	6
GCA_004154185.1	MGAS28360	Streptococcus pyogenes	6
GCA_004154205.1	MGAS28330	Streptococcus pyogenes	5
GCA_004154225.1	MGAS28278	Streptococcus pyogenes	6
GCA_004154245.1	MGAS28271	Streptococcus pyogenes	5
GCA_004154265.1	MGAS28191	Streptococcus pyogenes	6
GCA_004154285.1	MGAS11115	Streptococcus pyogenes	5
GCA_004154305.1	MGAS11108	Streptococcus pyogenes	5
GCA_004154325.1	MGAS29064	Streptococcus pyogenes	4
GCA_004154345.1	MGAS28386	Streptococcus pyogenes	3
GCA_004154365.1	MGAS28078	Streptococcus pyogenes	5
GCA_004154385.1	MGAS11052	Streptococcus pyogenes	5
GCA_004154405.1	MGAS10826	Streptococcus pyogenes	5
GCA_004193935.1	SP1336	Streptococcus pyogenes	4
GCA_005160445.1	emm57	Streptococcus pyogenes	1
GCA_005160565.1	emm74	Streptococcus pyogenes	4
GCA_005160785.1	emmSTG866.1	Streptococcus pyogenes	2
GCA_005160925.1	emm55	Streptococcus pyogenes	4
GCA_005161125.1	emm105	Streptococcus pyogenes	1
GCA_005161325.1	emm64.3	Streptococcus pyogenes	4
GCA_005161465.1	emm78.3	Streptococcus pyogenes	2
GCA_005161605.1	emm22.8	Streptococcus pyogenes	5
GCA_005161825.1	emm124	Streptococcus pyogenes	3
GCA_005161985.1	emm58	Streptococcus pyogenes	5
GCA_005162245.1	emm97.1	Streptococcus pyogenes	4
GCA_005162405.1	emm56	Streptococcus pyogenes	3
GCA_005162565.1	emm70	Streptococcus pyogenes	3
GCA_005162725.1	emm93.4	Streptococcus pyogenes	1
GCA_005162865.1	emm230	Streptococcus pyogenes	3
GCA_005163085.1		Streptococcus pyogenes	0
GCA_005163245.1	emm54	Streptococcus pyogenes	1
GCA_005163385.1	emmNA	Streptococcus pyogenes	3
GCA_005163565.1	emm11	Streptococcus pyogenes	2
GCA_005163705.1	emm65	Streptococcus pyogenes	3
GCA_005163865.1	emm75.1	Streptococcus pyogenes	3
GCA_005164025.1	emm89.14	Streptococcus pyogenes	3
GCA_005164305.1	emm77	Streptococcus pyogenes	2
GCA_005164585.1	emm1	Streptococcus pyogenes	3
GCA_005164705.1	emm25	Streptococcus pyogenes	5
GCA_005164885.1	emm90.5	Streptococcus pyogenes	1
GCA_005165045.1	emm92	Streptococcus pyogenes	2
GCA_005165265.1	emm100	Streptococcus pyogenes	4
GCA_005165385.1	emm197	Streptococcus pyogenes	3
GCA_005222545.1	emm68.2	Streptococcus pyogenes	1
GCA_006364235.1	FDAARGOS_774	Streptococcus pyogenes	6
GCA_006740645.2	10-85	Streptococcus pyogenes	3
GCA_008694005.1	FDAARGOS_668	Streptococcus pyogenes	4
GCA_009664495.1	AUSMDU00010539	Streptococcus pyogenes	1
GCA_009738475.1	STAB09023	Streptococcus pyogenes	1
GCA_009738495.1	STAB10048	Streptococcus pyogenes	1
GCA_009832845.1	1085	Streptococcus pyogenes	6
GCA_011290565.1	1040	Streptococcus pyogenes	1
GCA_011290585.1	1043	Streptococcus pyogenes	2
GCA_012572265.1	MGAS2221	Streptococcus pyogenes	3
GCA_013306985.1	May-63	Streptococcus pyogenes	4
GCA_014191695.1	NIH34	Streptococcus pyogenes	6
GCA_014191835.1	NIH35	Streptococcus pyogenes	5
GCA_014192005.1	KUN-0012590	Streptococcus pyogenes	4
GCA_014192175.1	KUN-0014944	Streptococcus pyogenes	1
GCA_014218015.1	37-97S	Streptococcus pyogenes	4
GCA_014218035.1		Streptococcus pyogenes	4
GCA_014495925.1	BSAC_bs192	Streptococcus pyogenes	5
GCA_014495945.1	BSAC_bs1388	Streptococcus pyogenes	5
GCA_014495965.1	BSAC_bs1802	Streptococcus pyogenes	5
GCA_014495985.1	BSAC_bs472	Streptococcus pyogenes	5
GCA_016126835.1	emm9ST603	Streptococcus pyogenes	4
GCA_016549335.1	iGAS426	Streptococcus pyogenes	8
GCA_016549355.1	iGAS376	Streptococcus pyogenes	8
GCA_016549375.1	iGAS391	Streptococcus pyogenes	8
GCA_017132795.1	M11318	Streptococcus pyogenes	3
GCA_017638465.1	M08500	Streptococcus pyogenes	4
GCA_018140985.1	TSPY1687	Streptococcus pyogenes	4
GCA_019342845.1	TSPY806	Streptococcus pyogenes	5
GCA_019342865.1	TSPY637	Streptococcus pyogenes	4
GCA_019342885.1	TSPY515	Streptococcus pyogenes	5
GCA_019342905.1	ABC245	Streptococcus pyogenes	4
GCA_019342925.1	ABC221	Streptococcus pyogenes	5
GCA_019342945.1	ABC208	Streptococcus pyogenes	5
GCA_019342965.1	ABC199	Streptococcus pyogenes	4
GCA_019342985.1	ABC157	Streptococcus pyogenes	4
GCA_019343005.1	ABC155	Streptococcus pyogenes	4
GCA_019343025.1	ABC122	Streptococcus pyogenes	5
GCA_019343045.1	ABC76	Streptococcus pyogenes	4
GCA_019343065.1	ABC25	Streptococcus pyogenes	4
GCA_019343085.1	ABC3	Streptococcus pyogenes	4
GCA_019448315.1	TSPY767	Streptococcus pyogenes	5
GCA_020826915.1	TSPY141	Streptococcus pyogenes	4
GCA_020826935.1	TSPY153	Streptococcus pyogenes	5
GCA_020826955.1	TSPY764	Streptococcus pyogenes	2
GCA_020826975.1	TSPY210	Streptococcus pyogenes	3
GCA_020826995.1	TSPY1312	Streptococcus pyogenes	3
GCA_020827015.1	TSPY416	Streptococcus pyogenes	2
GCA_020827035.1	TSPY1309	Streptococcus pyogenes	1
GCA_020827055.1	TSPY1349	Streptococcus pyogenes	4
GCA_020827075.1	TSPY1026	Streptococcus pyogenes	4
GCA_020827095.1	TSPY136	Streptococcus pyogenes	2
GCA_020827115.1	TSPY383	Streptococcus pyogenes	3
GCA_020827135.1	TSPY270	Streptococcus pyogenes	3
GCA_022494495.1	SHZ-1	Streptococcus pyogenes	4
GCA_022869605.1	PartK-Spyogenes-RM8376	Streptococcus pyogenes	5
GCA_022869745.1		Streptococcus pyogenes	5
GCA_023278205.1	MGAS270	Streptococcus pyogenes	3
GCA_023380045.1	21SPY7071	Streptococcus pyogenes	6
GCA_028215815.1	1095	Streptococcus pyogenes	2
GCA_028370195.1	SP1451	Streptococcus pyogenes	5
GCA_028370215.1	SP1450	Streptococcus pyogenes	3
GCA_028370235.1	SP1448	Streptococcus pyogenes	3
GCA_028370255.1	SP1426	Streptococcus pyogenes	4
GCA_028370275.1	SP1384	Streptococcus pyogenes	3
GCA_028370295.1	SP1380	Streptococcus pyogenes	4
GCA_028867825.1	MGAS10870	Streptococcus pyogenes	5
GCA_029280505.1	1039	Streptococcus pyogenes	3
GCA_029280565.1	1042	Streptococcus pyogenes	2
GCA_029280585.1	1133	Streptococcus pyogenes	4
GCA_029323775.1	1004	Streptococcus pyogenes	2
GCA_029637645.1	1044	Streptococcus pyogenes	6
GCA_034430055.1	NV28	Streptococcus pyogenes	3
GCA_034432415.1	NV27	Streptococcus pyogenes	3
GCA_034434355.2	NV1	Streptococcus pyogenes	3
GCA_034436135.1	NV6	Streptococcus pyogenes	3
GCA_035620135.1	CQMU_CQ01	Streptococcus pyogenes	7
GCA_035918415.1	11RS100	Streptococcus pyogenes	5
GCA_035918435.1	SS1445	Streptococcus pyogenes	4
GCA_035918455.1	SS1366	Streptococcus pyogenes	3
GCA_035918475.1	2907-97	Streptococcus pyogenes	4
GCA_035918495.1	D641	Streptococcus pyogenes	2
GCA_035918515.1	6745-99	Streptococcus pyogenes	3
GCA_035918535.1	A946	Streptococcus pyogenes	3
GCA_035918555.1	CT95-157	Streptococcus pyogenes	2
GCA_035918575.1	AW-534	Streptococcus pyogenes	3
GCA_035918595.1	6702-99	Streptococcus pyogenes	3
GCA_036347555.1	Spyo01	Streptococcus pyogenes	2
GCA_036347575.1	Spyo06	Streptococcus pyogenes	3
GCA_036347595.1	Spyo09	Streptococcus pyogenes	2
GCA_036353505.2	Isolate 21	Streptococcus pyogenes	3
GCA_037298275.1		Streptococcus pyogenes	4
GCA_037764615.1	strain MGAS2221	Streptococcus pyogenes	3
GCA_038385395.1	MGAS37856	Streptococcus pyogenes	3
GCA_038386885.1	MGAS37835	Streptococcus pyogenes	3
GCA_038388625.1	MGAS37830	Streptococcus pyogenes	3
GCA_038390225.1	MGAS37827	Streptococcus pyogenes	3
GCA_038390915.1	MGAS37824	Streptococcus pyogenes	3
GCA_039619335.1	318231	Streptococcus pyogenes	2
GCA_041071735.1	8373/17	Streptococcus pyogenes	7
GCA_041071845.1	4958/15	Streptococcus pyogenes	7
GCA_041072535.1	1966/14	Streptococcus pyogenes	7
GCA_041072725.1	Nov-06	Streptococcus pyogenes	8
GCA_041072835.1	1510/08	Streptococcus pyogenes	6
GCA_041073745.1	997/08	Streptococcus pyogenes	6
GCA_041074175.1	1851/03	Streptococcus pyogenes	5
GCA_041074825.1	400/03	Streptococcus pyogenes	7
GCA_041429915.1	Isolate 34	Streptococcus pyogenes	3
GCA_041429935.1	Isolate 35	Streptococcus pyogenes	2
GCA_041429945.1	Isolate 33	Streptococcus pyogenes	3
GCA_041430105.1	Isolate 31	Streptococcus pyogenes	3
GCA_041430535.1	Isolate 30	Streptococcus pyogenes	5
GCA_041430835.1	Isolate 29	Streptococcus pyogenes	3
GCA_041430845.1	Isolate 28	Streptococcus pyogenes	6
GCA_041430855.1	Isolate 27	Streptococcus pyogenes	5
GCA_041430865.1	Isolate 26	Streptococcus pyogenes	1
GCA_041430875.1	Isolate 23	Streptococcus pyogenes	5
GCA_041430885.1	Isolate 24	Streptococcus pyogenes	2
GCA_041430895.1	Isolate 22	Streptococcus pyogenes	5
GCA_041430905.1	Isolate 20	Streptococcus pyogenes	2
GCA_041430915.1	Isolate 18	Streptococcus pyogenes	5
GCA_041430925.1	Isolate 17	Streptococcus pyogenes	4
GCA_041430935.1		Streptococcus pyogenes	0
GCA_041430945.1	Isolate 11	Streptococcus pyogenes	4
GCA_041430955.1	Isolate 12	Streptococcus pyogenes	1
GCA_041430965.1	Isolate 10	Streptococcus pyogenes	3
GCA_041430975.1	Isolate 9	Streptococcus pyogenes	3
GCA_041430985.1	Isolate 8	Streptococcus pyogenes	5
GCA_041430995.1	Isolate 7	Streptococcus pyogenes	3
GCA_041431005.1	Isolate 6	Streptococcus pyogenes	2
GCA_041431015.1	Isolate 4	Streptococcus pyogenes	2
GCA_041431025.1	Isolate 5	Streptococcus pyogenes	5
GCA_041431035.1	Isolate 3	Streptococcus pyogenes	6
GCA_041431045.1	Isolate 2	Streptococcus pyogenes	4
GCA_041431055.1		Streptococcus pyogenes	0
GCA_041447185.1	Isolate 32	Streptococcus pyogenes	3
GCA_041447195.1	Isolate 13	Streptococcus pyogenes	3
GCA_043231225.1	SF370	Streptococcus pyogenes	4
GCA_044360805.1	20154608	Streptococcus pyogenes	3
GCA_044360885.1	20200554	Streptococcus pyogenes	5
GCA_044360945.1	20203206	Streptococcus pyogenes	5
GCA_044361035.1	20192362	Streptococcus pyogenes	4
GCA_044361075.1	20154051	Streptococcus pyogenes	6
GCA_044361135.1	20164915	Streptococcus pyogenes	5
GCA_044361195.1	20181688	Streptococcus pyogenes	7
GCA_044361245.1	20185322	Streptococcus pyogenes	4
GCA_044361285.1	20160179	Streptococcus pyogenes	3
GCA_045290375.1	MGAS37817	Streptococcus pyogenes	3
GCA_045290385.1	MGAS37822	Streptococcus pyogenes	3
GCA_045290395.1	MGAS37823	Streptococcus pyogenes	3
GCA_045290405.1	MGAS37829	Streptococcus pyogenes	3
GCA_045290415.1	MGAS37837	Streptococcus pyogenes	3
GCA_045290435.1	MGAS37843	Streptococcus pyogenes	3
GCA_045290545.1	MGAS37844	Streptococcus pyogenes	3
GCA_045290615.1	MGAS37850	Streptococcus pyogenes	3
GCA_045290705.1	MGAS37857	Streptococcus pyogenes	3
GCA_045290995.1	MGAS38345	Streptococcus pyogenes	3
GCA_045345455.1	EMM113	Streptococcus pyogenes	1
GCA_045345895.1	GAS strain MGAS2221	Streptococcus pyogenes	3
GCA_045690025.1	MGAS37826	Streptococcus pyogenes	3
GCA_045690035.1	MGAS37828	Streptococcus pyogenes	3
GCA_045690045.1	MGAS37831	Streptococcus pyogenes	3
GCA_045690055.1	MGAS37832	Streptococcus pyogenes	3
GCA_045690065.1	MGAS37833	Streptococcus pyogenes	3
GCA_045690075.1	MGAS37834	Streptococcus pyogenes	3
GCA_045690085.1	MGAS37836	Streptococcus pyogenes	3
GCA_045690095.1	MGAS37839	Streptococcus pyogenes	3
GCA_045690105.1	MGAS37842	Streptococcus pyogenes	3
GCA_045690115.1	MGAS37847	Streptococcus pyogenes	3
GCA_045690125.1	MGAS37848	Streptococcus pyogenes	3
GCA_045690135.1	MGAS37849	Streptococcus pyogenes	3
GCA_045690145.1	MGAS37853	Streptococcus pyogenes	3
GCA_045690155.1	MGAS37854	Streptococcus pyogenes	3
GCA_045690165.1	MGAS37859	Streptococcus pyogenes	3
GCA_045690175.1	MGAS37861	Streptococcus pyogenes	3
GCA_045690185.1	MGAS37637	Streptococcus pyogenes	3
GCA_045690195.1	MGAS37641	Streptococcus pyogenes	3
GCA_045690205.1	MGAS37642	Streptococcus pyogenes	3
GCA_045690215.1	MGAS37644	Streptococcus pyogenes	3
GCA_045690225.1	MGAS37674	Streptococcus pyogenes	3
GCA_045690235.1	MGAS38289	Streptococcus pyogenes	3
GCA_045690245.1	MGAS38337	Streptococcus pyogenes	3
GCA_045690255.1	MGAS38343	Streptococcus pyogenes	3
GCA_045690265.1	MGAS38362	Streptococcus pyogenes	3
GCA_050214215.1		Streptococcus pyogenes	1
GCA_050823505.1	DMG2301705	Streptococcus pyogenes	5
GCA_050823515.1	DMG2211972	Streptococcus pyogenes	3
GCA_050824005.1	DMG2301723	Streptococcus pyogenes	3
GCA_900474455.1	NCTC8225	Streptococcus pyogenes	6
GCA_900474645.1	NCTC5163	Streptococcus pyogenes	5
GCA_900474745.1	NCTC12059	Streptococcus pyogenes	2
GCA_900474765.1	NCTC8314	Streptococcus pyogenes	4
GCA_900474775.1	NCTC12066	Streptococcus pyogenes	2
GCA_900474795.1	NCTC5164	Streptococcus pyogenes	5
GCA_900474815.1	NCTC8300	Streptococcus pyogenes	2
GCA_900474825.1	NCTC12045	Streptococcus pyogenes	2
GCA_900474835.1	NCTC12069	Streptococcus pyogenes	4
GCA_900474845.1	NCTC12057	Streptococcus pyogenes	3
GCA_900474855.1	NCTC8328	Streptococcus pyogenes	5
GCA_900474865.1	NCTC12058	Streptococcus pyogenes	3
GCA_900474885.1	NCTC12046	Streptococcus pyogenes	3
GCA_900474895.1	NCTC12696	Streptococcus pyogenes	4
GCA_900474915.1	NCTC12048	Streptococcus pyogenes	2
GCA_900474925.1	NCTC12050	Streptococcus pyogenes	4
GCA_900474935.1	NCTC12047	Streptococcus pyogenes	2
GCA_900474945.1	NCTC8316	Streptococcus pyogenes	1
GCA_900474955.1	NCTC8332	Streptococcus pyogenes	5
GCA_900474965.1	NCTC8231	Streptococcus pyogenes	2
GCA_900474975.1	NCTC12052	Streptococcus pyogenes	5
GCA_900474995.1	NCTC12840	Streptococcus pyogenes	4
GCA_900475005.1	NCTC12062	Streptococcus pyogenes	3
GCA_900475035.1	NCTC12064	Streptococcus pyogenes	2
GCA_900475075.1	NCTC8195	Streptococcus pyogenes	6
GCA_900475085.1	NCTC8324	Streptococcus pyogenes	6
GCA_900475105.1	NCTC4001	Streptococcus pyogenes	2
GCA_900475115.1	NCTC8326	Streptococcus pyogenes	4
GCA_900475135.1	NCTC12067	Streptococcus pyogenes	1
GCA_900475155.1		Streptococcus pyogenes	0
GCA_900475165.1	NCTC8230	Streptococcus pyogenes	6
GCA_900475175.1	NCTC10876	Streptococcus pyogenes	5
GCA_900475335.1	NCTC8322	Streptococcus pyogenes	5
GCA_900475425.1	NCTC10874	Streptococcus pyogenes	3
GCA_900475455.1	NCTC10879	Streptococcus pyogenes	5
GCA_900475465.1	NCTC8224	Streptococcus pyogenes	4
GCA_900475475.1	NCTC13738	Streptococcus pyogenes	4
GCA_900475485.1	NCTC8320	Streptococcus pyogenes	4
GCA_900475495.1	NCTC13742	Streptococcus pyogenes	6
GCA_900475525.1	NCTC13743	Streptococcus pyogenes	4
GCA_900475565.1	NCTC10880	Streptococcus pyogenes	3
GCA_900475615.1	NCTC8227	Streptococcus pyogenes	4
GCA_900475645.1	NCTC10085	Streptococcus pyogenes	2
GCA_900475705.1	NCTC13744	Streptococcus pyogenes	3
GCA_900475765.1	NCTC13736	Streptococcus pyogenes	6
GCA_900475785.1	NCTC10877	Streptococcus pyogenes	2
GCA_900475795.1	NCTC8304	Streptococcus pyogenes	3
GCA_900475865.1	NCTC13739	Streptococcus pyogenes	2
GCA_900475875.1	NCTC13737	Streptococcus pyogenes	3
GCA_900475925.1	NCTC12044	Streptococcus pyogenes	2
GCA_900475955.1	NCTC13745	Streptococcus pyogenes	3
GCA_900475985.1	NCTC13751	Streptococcus pyogenes	4
GCA_900476015.1	NCTC8370	Streptococcus pyogenes	2
GCA_900608505.1	S119	Streptococcus pyogenes	4
GCA_900619585.1	5448	Streptococcus pyogenes	3
GCA_900619595.1	SP444	Streptococcus pyogenes	4
GCA_900619605.1	HKU419	Streptococcus pyogenes	4
GCA_900619615.1	PS003	Streptococcus pyogenes	2
GCA_900619625.1	PS006	Streptococcus pyogenes	3
GCA_900636425.1	NCTC12060	Streptococcus pyogenes	2
GCA_900636485.1	NCTC8232	Streptococcus pyogenes	6
GCA_900636725.1	NCTC8302	Streptococcus pyogenes	3
GCA_901472475.1	NCTC8193	Streptococcus pyogenes	5
GCA_901482645.1	NCTC8318	Streptococcus pyogenes	3
GCA_000006785.2	SF370	Streptococcus pyogenes	4
GCA_000007285.1	MGAS8232	Streptococcus pyogenes	5
GCA_000007425.1	MGAS315	Streptococcus pyogenes	6
GCA_000009385.1	Manfredo	Streptococcus pyogenes	5
GCA_000011285.1	SSI-1	Streptococcus pyogenes	6
GCA_000011665.1	MGAS10394	Streptococcus pyogenes	7
GCA_000011765.2	MGAS5005	Streptococcus pyogenes	3
GCA_000012165.2	MGAS6180	Streptococcus pyogenes	6
GCA_000013485.1	MGAS9429	Streptococcus pyogenes	3
GCA_000013505.1	MGAS10270	Streptococcus pyogenes	7
GCA_000013525.1	MGAS2096	Streptococcus pyogenes	3
GCA_000013545.1	MGAS10750	Streptococcus pyogenes	5
GCA_000018125.1	NZ131; ATCC BAA-1633	Streptococcus pyogenes	3
GCA_000167435.2	M49 591	Streptococcus pyogenes	2
GCA_000230295.1	Alab49	Streptococcus pyogenes	4
GCA_000250905.1	MGAS15252	Streptococcus pyogenes	2
GCA_008803015.1	ATCC 31377	Streptococcus ratti	1
GCA_003595525.1	HTS25	Streptococcus respiraculi	2
GCA_019334785.1	LPB0404	Streptococcus rubneri	2
GCA_003609975.1	GUT187T	Streptococcus ruminantium	2
GCA_021654515.1	GUT-183	Streptococcus ruminantium	4
GCA_021654535.1	GUT-184	Streptococcus ruminantium	5
GCA_021654555.1	GUT-189	Streptococcus ruminantium	5
GCA_022936265.1	SALI-10	Streptococcus salivarius	1
GCA_031192325.1	LMG 11489	Streptococcus salivarius	4
GCA_040364775.1	NBRC 13956	Streptococcus salivarius	3
GCA_045274615.1		Streptococcus salivarius	1
GCA_046531375.1		Streptococcus salivarius	0
GCA_046531385.1		Streptococcus salivarius	0
GCA_046531395.1	KSS3	Streptococcus salivarius	5
GCA_046531505.1	KSS2	Streptococcus salivarius	5
GCA_046531515.1	KSS4	Streptococcus salivarius	1
GCA_046531525.1	KSS6	Streptococcus salivarius	4
GCA_046531535.1	KSS7	Streptococcus salivarius	2
GCA_046531545.1	KSS8	Streptococcus salivarius	2
GCA_046531555.1	KSS9	Streptococcus salivarius	1
GCA_046531605.1	KSS10	Streptococcus salivarius	1
GCA_046531615.1	KSS12	Streptococcus salivarius	4
GCA_046531625.1	KSS5	Streptococcus salivarius	1
GCA_046763045.1	MRD-NRLLH	Streptococcus salivarius	2
GCA_046763055.1	MRD-KRBY	Streptococcus salivarius	1
GCA_046763065.1	MRD1919	Streptococcus salivarius	2
GCA_046763075.1	MRD6060	Streptococcus salivarius	1
GCA_900475225.1	NCTC7366	Streptococcus salivarius	5
GCA_900636435.1	NCTC8618	Streptococcus salivarius	4
GCA_000253315.1	JIM8777	Streptococcus salivarius	3
GCA_000253335.1	CCHSS3	Streptococcus salivarius	3
GCA_000305335.2	57.I	Streptococcus salivarius	3
GCA_000448685.2	HSISS4	Streptococcus salivarius	1
GCA_000785515.1	NCTC 8618	Streptococcus salivarius	3
GCA_001543085.1	JF	Streptococcus salivarius	5
GCA_002073835.2	FDAARGOS_259	Streptococcus salivarius	5
GCA_002094955.1	ATCC 27945	Streptococcus salivarius	2
GCA_002094975.1	ATCC 25975	Streptococcus salivarius	3
GCA_008305695.1	LAB813	Streptococcus salivarius	5
GCA_009738205.1	ICDC1	Streptococcus salivarius	3
GCA_009738225.1	ICDC2	Streptococcus salivarius	2
GCA_009738245.1	ICDC3	Streptococcus salivarius	3
GCA_013267495.1	FDAARGOS_771	Streptococcus salivarius	2
GCA_013822985.1	DB-B5	Streptococcus salivarius	4
GCA_016127535.1		Streptococcus salivarius	0
GCA_018599045.2	E636	Streptococcus salivarius	2
GCA_050223405.1	SK678R	Streptococcus sanguinis	2
GCA_050223855.1	SK408R	Streptococcus sanguinis	3
GCA_050223945.1	SK405R	Streptococcus sanguinis	1
GCA_050224395.1		Streptococcus sanguinis	0
GCA_050224525.1	SK353R	Streptococcus sanguinis	1
GCA_050224935.1	SK340R	Streptococcus sanguinis	1
GCA_050225025.1	SK160R	Streptococcus sanguinis	1
GCA_050225395.1	SK330R	Streptococcus sanguinis	2
GCA_050225505.1	SK150R	Streptococcus sanguinis	1
GCA_050225895.1	SK49R	Streptococcus sanguinis	3
GCA_050226025.1	SK36R	Streptococcus sanguinis	1
GCA_050227955.1		Streptococcus sanguinis	0
GCA_050228045.1	SK1059R	Streptococcus sanguinis	3
GCA_050228515.1	SK72R	Streptococcus sanguinis	2
GCA_050228625.1	BCC39R	Streptococcus sanguinis	3
GCA_050229115.1		Streptococcus sanguinis	0
GCA_050229185.1		Streptococcus sanguinis	0
GCA_050229875.1	KLC03R	Streptococcus sanguinis	1
GCA_050230025.1	BCC37R	Streptococcus sanguinis	3
GCA_050230805.1	BCC28R	Streptococcus sanguinis	3
GCA_050230955.1	BCC04R	Streptococcus sanguinis	3
GCA_050231635.1		Streptococcus sanguinis	0
GCA_050234405.1	SK115R	Streptococcus sanguinis	2
GCA_050234515.1	BCC24R	Streptococcus sanguinis	1
GCA_050234945.1	BCC54R	Streptococcus sanguinis	5
GCA_050235035.1		Streptococcus sanguinis	0
GCA_900475045.1	NCTC11085	Streptococcus sanguinis	1
GCA_900475275.1	NCTC11086	Streptococcus sanguinis	3
GCA_900475505.1		Streptococcus sanguinis	0
GCA_900635155.1	NCTC 10904	Streptococcus sanguinis	2
GCA_000014205.1	SK36	Streptococcus sanguinis	1
GCA_013343115.1		Streptococcus sanguinis	0
GCA_013378335.1	CGMH010	Streptococcus sanguinis	2
GCA_013378355.1	CGMH058	Streptococcus sanguinis	4
GCA_050220005.1	KLC08R	Streptococcus sanguinis	1
GCA_050220455.1	BCC64R	Streptococcus sanguinis	2
GCA_050220565.1	BCC61R	Streptococcus sanguinis	1
GCA_050221055.1		Streptococcus sanguinis	0
GCA_050221165.1	BCC23R	Streptococcus sanguinis	2
GCA_050221615.1	BCC18R	Streptococcus sanguinis	1
GCA_050221725.1	BCC16R	Streptococcus sanguinis	3
GCA_050222175.1	BCC03R	Streptococcus sanguinis	2
GCA_050222305.1	SK1087R	Streptococcus sanguinis	1
GCA_050222735.1	SK1058R	Streptococcus sanguinis	1
GCA_050222825.1	SK1057R	Streptococcus sanguinis	2
GCA_050223295.1	SK1056R	Streptococcus sanguinis	3
GCA_900475365.1		Streptococcus sobrinus	0
GCA_900475395.1	NCTC12279	Streptococcus sobrinus	1
GCA_003172975.1		Streptococcus sobrinus	0
GCA_003172995.1		Streptococcus sobrinus	0
GCA_003176795.1	NIDR 6715-7	Streptococcus sobrinus	1
GCA_003176815.1	NIDR 6715-15	Streptococcus sobrinus	1
GCA_001610935.1	90-1330	Streptococcus suis	7
GCA_001640765.1	DN13	Streptococcus suis	6
GCA_001721625.1	GZ0565	Streptococcus suis	6
GCA_001936415.1	SS2-1	Streptococcus suis	4
GCA_002111405.1	SC19	Streptococcus suis	4
GCA_002189695.1	LSM102	Streptococcus suis	3
GCA_002285535.1		Streptococcus suis	7
GCA_002285735.2	ISU2812	Streptococcus suis	6
GCA_002688665.1	CS100322	Streptococcus suis	4
GCA_002736265.1	HA0609	Streptococcus suis	9
GCA_002803825.1	CZ130302	Streptococcus suis	7
GCA_002812525.1	AH681	Streptococcus suis	4
GCA_002831545.1	HN136	Streptococcus suis	7
GCA_003144175.1	HN105	Streptococcus suis	3
GCA_003285225.1	0061	Streptococcus suis	3
GCA_003285245.1	1081	Streptococcus suis	5
GCA_003288175.1	SH0104	Streptococcus suis	6
GCA_003352205.1	HA1003	Streptococcus suis	6
GCA_003352225.1	SH1510	Streptococcus suis	5
GCA_004843685.1	WUSS351	Streptococcus suis	4
GCA_007724845.1	INT-01	Streptococcus suis	5
GCA_013488085.1	ISU1606	Streptococcus suis	3
GCA_013488105.1	ISU2514	Streptococcus suis	5
GCA_013488125.1	ISU2714	Streptococcus suis	3
GCA_013488145.1	ISU2414	Streptococcus suis	9
GCA_013488165.1	ISU2614	Streptococcus suis	8
GCA_013488185.1	ISU2660	Streptococcus suis	5
GCA_014192345.1	DAT299	Streptococcus suis	7
GCA_014192525.1	DAT300	Streptococcus suis	9
GCA_014843055.1	16085/3b	Streptococcus suis	6
GCA_014843075.1	13-00283-02	Streptococcus suis	4
GCA_014843095.1	10	Streptococcus suis	4
GCA_014874555.1	LSM178	Streptococcus suis	5
GCA_015291825.1	YSJ17	Streptococcus suis	8
GCA_015908885.1	YZDH1	Streptococcus suis	8
GCA_015908985.1	YP20190405	Streptococcus suis	5
GCA_016774475.1	ID33329	Streptococcus suis	2
GCA_016887735.2	ID32098	Streptococcus suis	2
GCA_017309405.1	SC183	Streptococcus suis	7
GCA_017372155.1	1112S	Streptococcus suis	5
GCA_018885285.1	39565	Streptococcus suis	3
GCA_019265165.1		Streptococcus suis	0
GCA_019265185.1		Streptococcus suis	0
GCA_019265205.1		Streptococcus suis	0
GCA_019297755.1	ID41570	Streptococcus suis	2
GCA_019856275.1	SS389	Streptococcus suis	6
GCA_019856315.1	NJ3	Streptococcus suis	5
GCA_019856335.1	FJSM5	Streptococcus suis	8
GCA_019856355.1	Transconjugant cNJ3	Streptococcus suis	4
GCA_019856375.1	Transconjugant cFJSM5	Streptococcus suis	4
GCA_019856395.1	Transconjugant cSS389	Streptococcus suis	4
GCA_019856415.1	Transconjugant cDY107	Streptococcus suis	4
GCA_019856455.1	AKJ18	Streptococcus suis	5
GCA_019856475.1	Transconjugant cAKJ18	Streptococcus suis	4
GCA_019967855.1	SZ1908	Streptococcus suis	4
GCA_020462325.1	GX69	Streptococcus suis	10
GCA_020541945.1	Ssuis_MA8	Streptococcus suis	3
GCA_020541965.1	Ssuis_MA6	Streptococcus suis	2
GCA_020542005.1	Ssuis_MA4	Streptococcus suis	6
GCA_020542025.1	Ssuis_MA2	Streptococcus suis	2
GCA_020542045.1		Streptococcus suis	0
GCA_021729385.1	LSM29	Streptococcus suis	4
GCA_021729405.1	LSM157	Streptococcus suis	4
GCA_022354845.1	SFJ44	Streptococcus suis	1
GCA_022964955.1	TJS75	Streptococcus suis	3
GCA_023023005.1	TJS56	Streptococcus suis	2
GCA_024206595.1	STC78	Streptococcus suis	8
GCA_024206615.1	STC80	Streptococcus suis	8
GCA_024206635.1	STC84	Streptococcus suis	8
GCA_024206655.1	STC83	Streptococcus suis	8
GCA_024206675.1	STC81	Streptococcus suis	8
GCA_024206695.1	STC90	Streptococcus suis	8
GCA_024206715.1	STC86	Streptococcus suis	8
GCA_024206735.1	STC85	Streptococcus suis	8
GCA_024206755.1	STC104	Streptococcus suis	8
GCA_024220075.1	1521251	Streptococcus suis	9
GCA_024220115.1	LSS42	Streptococcus suis	6
GCA_024220135.1	T15	Streptococcus suis	7
GCA_024498155.1	2018WUSS151	Streptococcus suis	4
GCA_024509515.2	DE609B	Streptococcus suis	3
GCA_024582755.1	12RC1	Streptococcus suis	2
GCA_024582915.1	DNC49	Streptococcus suis	6
GCA_024582935.1	M106471_S40	Streptococcus suis	10
GCA_024582955.1	M104300_S20	Streptococcus suis	4
GCA_024582975.1	M105052_S26	Streptococcus suis	7
GCA_024582995.1	M102942_S11	Streptococcus suis	4
GCA_024583015.1	DNR43	Streptococcus suis	9
GCA_024583035.1	DNR48	Streptococcus suis	9
GCA_024583055.1	DNS20	Streptococcus suis	3
GCA_024583075.1	DNC15	Streptococcus suis	5
GCA_024583095.1	DNC13	Streptococcus suis	8
GCA_024583115.1	DNS11	Streptococcus suis	7
GCA_024583135.1	SS15055_N2_C15	Streptococcus suis	3
GCA_025349925.1	ISU2912	Streptococcus suis	11
GCA_025723185.1		Streptococcus suis	6
GCA_025946865.1	ID36054	Streptococcus suis	7
GCA_025946885.1	TRG6	Streptococcus suis	7
GCA_025946905.1	ID38828	Streptococcus suis	4
GCA_025946925.1	ID34572	Streptococcus suis	6
GCA_025946945.1	ID35541	Streptococcus suis	2
GCA_025980045.1	WUSS030	Streptococcus suis	6
GCA_029203915.2	3112	Streptococcus suis	1
GCA_029542025.1	Transconjugant cAKJ47-2	Streptococcus suis	5
GCA_029542065.1	Transconjugant cSFJ45	Streptococcus suis	3
GCA_029542385.1	SS/UPM/MY/F001	Streptococcus suis	8
GCA_031767395.1	NLS50	Streptococcus suis	10
GCA_031767605.1	NLS40	Streptococcus suis	3
GCA_031767625.1	1522228	Streptococcus suis	7
GCA_031767645.1	TMW_SS028	Streptococcus suis	8
GCA_031875385.1		Streptococcus suis	9
GCA_031875405.1		Streptococcus suis	12
GCA_032147025.1	ID32563	Streptococcus suis	5
GCA_032147105.1	ID24665	Streptococcus suis	5
GCA_032230435.1	ID26102	Streptococcus suis	11
GCA_032230945.1	ID34567	Streptococcus suis	5
GCA_032230965.1	ID48908	Streptococcus suis	10
GCA_032230985.1	1652329	Streptococcus suis	7
GCA_032231005.1	1547095	Streptococcus suis	6
GCA_034047115.1	cnzyss2-311	Streptococcus suis	2
GCA_034423895.1		Streptococcus suis	2
GCA_034423915.1		Streptococcus suis	9
GCA_034423935.1		Streptococcus suis	5
GCA_034423955.1		Streptococcus suis	7
GCA_034423975.1		Streptococcus suis	4
GCA_034423995.1		Streptococcus suis	3
GCA_034424015.1		Streptococcus suis	3
GCA_034424035.1		Streptococcus suis	7
GCA_034440185.1	2022WUSS148	Streptococcus suis	8
GCA_035658235.1		Streptococcus suis	3
GCA_036320595.1	HB18	Streptococcus suis	4
GCA_037940715.1	YA	Streptococcus suis	3
GCA_038650695.1	Ss2301	Streptococcus suis	4
GCA_044361715.1	MY1C3_3B	Streptococcus suis	8
GCA_045689715.1		Streptococcus suis	3
GCA_046245185.1	KKAHC02	Streptococcus suis	7
GCA_048213105.1	HBXY-SL	Streptococcus suis	2
GCA_049163785.1	34391	Streptococcus suis	1
GCA_049163795.1	34410	Streptococcus suis	2
GCA_049164385.1	34550	Streptococcus suis	1
GCA_049164415.1	34558	Streptococcus suis	2
GCA_049164905.1	34562	Streptococcus suis	6
GCA_049164955.1	34566	Streptococcus suis	1
GCA_049165385.1	34684	Streptococcus suis	2
GCA_049165415.1	34692	Streptococcus suis	5
GCA_049165925.1	35538	Streptococcus suis	2
GCA_049165935.1	35539	Streptococcus suis	2
GCA_049166465.1	35540	Streptococcus suis	2
GCA_049166495.1	35542	Streptococcus suis	2
GCA_049166525.1	35543	Streptococcus suis	2
GCA_049166535.1	35544	Streptococcus suis	2
GCA_049166545.1	35545	Streptococcus suis	2
GCA_049166555.1	STC501	Streptococcus suis	3
GCA_049166565.1	STC516	Streptococcus suis	2
GCA_900143575.1	LS9N	Streptococcus suis	2
GCA_900475585.1		Streptococcus suis	0
GCA_901543625.1	NCTC10237	Streptococcus suis	3
GCA_902702745.1		Streptococcus suis	1
GCA_902702755.1		Streptococcus suis	2
GCA_902702765.1		Streptococcus suis	4
GCA_902702775.1		Streptococcus suis	2
GCA_902702785.1		Streptococcus suis	1
GCA_947096915.1		Streptococcus suis	1
GCA_947097575.1		Streptococcus suis	1
GCA_947098765.1		Streptococcus suis	1
GCA_947098835.1		Streptococcus suis	1
GCA_947098855.1		Streptococcus suis	1
GCA_947099305.1		Streptococcus suis	1
GCA_000014305.1	05ZYH33	Streptococcus suis	5
GCA_000014325.1	98HAH33	Streptococcus suis	5
GCA_000018185.1	GZ1	Streptococcus suis	2
GCA_000026725.1	SC84	Streptococcus suis	4
GCA_000026745.1	BM407	Streptococcus suis	6
GCA_000091905.1	P1/7	Streptococcus suis	1
GCA_000168355.3	05HAS68	Streptococcus suis	7
GCA_000186405.1	JS14	Streptococcus suis	4
GCA_000204625.1	ST3	Streptococcus suis	3
GCA_000231865.1	SS12	Streptococcus suis	4
GCA_000231885.1	D9	Streptococcus suis	3
GCA_000231905.1	D12	Streptococcus suis	6
GCA_000231925.1	ST1	Streptococcus suis	2
GCA_000233575.1	A7	Streptococcus suis	3
GCA_000294495.1		Streptococcus suis	0
GCA_000344765.1	SC070731	Streptococcus suis	4
GCA_000390245.1	TL13	Streptococcus suis	8
GCA_000471985.1	YB51	Streptococcus suis	3
GCA_000494895.1	T15	Streptococcus suis	7
GCA_000732355.1	6407	Streptococcus suis	7
GCA_000993745.1	ZY05719	Streptococcus suis	4
GCA_001272635.1	NSUI002	Streptococcus suis	10
GCA_001572685.1	NSUI060	Streptococcus suis	6
GCA_001663795.1	KLDS SM	Streptococcus thermophilus	1
GCA_001685375.1	CS8	Streptococcus thermophilus	2
GCA_001705585.1	KLDS 3.1003	Streptococcus thermophilus	2
GCA_001855705.1	ND07	Streptococcus thermophilus	1
GCA_002012365.1	APC151	Streptococcus thermophilus	1
GCA_002286255.1	ST3	Streptococcus thermophilus	1
GCA_002443035.1	B59671	Streptococcus thermophilus	1
GCA_002843115.1	DGCC 7710	Streptococcus thermophilus	1
GCA_002846075.1		Streptococcus thermophilus	0
GCA_002846155.1	EPS	Streptococcus thermophilus	1
GCA_003402855.1		Streptococcus thermophilus	0
GCA_003443395.1		Streptococcus thermophilus	0
GCA_004114735.1	IDCC2201	Streptococcus thermophilus	1
GCA_009856565.1	EU01	Streptococcus thermophilus	3
GCA_010120595.1	ATCC 19258	Streptococcus thermophilus	2
GCA_010692845.1		Streptococcus thermophilus	0
GCA_011801285.1		Streptococcus thermophilus	0
GCA_013307185.1	CS5	Streptococcus thermophilus	1
GCA_013307265.1	CS9	Streptococcus thermophilus	2
GCA_013307285.1	CS18	Streptococcus thermophilus	1
GCA_015190465.1	TK-P3A	Streptococcus thermophilus	2
GCA_017359825.1	24853	Streptococcus thermophilus	3
GCA_017359885.1	24740	Streptococcus thermophilus	2
GCA_017360005.1	24739	Streptococcus thermophilus	3
GCA_017360085.1	24738	Streptococcus thermophilus	2
GCA_017360165.1	13499	Streptococcus thermophilus	2
GCA_017360245.1	13498	Streptococcus thermophilus	3
GCA_017360305.1	13496	Streptococcus thermophilus	2
GCA_017584245.1	MAG_rmk202_sterm	Streptococcus thermophilus	3
GCA_018219175.1	DMST-H2	Streptococcus thermophilus	1
GCA_019450155.1		Streptococcus thermophilus	1
GCA_020736685.1		Streptococcus thermophilus	7
GCA_020844005.1	4078	Streptococcus thermophilus	1
GCA_022024355.1	CS20	Streptococcus thermophilus	1
GCA_023207975.1	CS6	Streptococcus thermophilus	1
GCA_023278025.1	VHProbi R08	Streptococcus thermophilus	1
GCA_024334065.1		Streptococcus thermophilus	0
GCA_024665315.1	TH-4	Streptococcus thermophilus	1
GCA_024731205.1		Streptococcus thermophilus	0
GCA_025739165.1	UCCSt95	Streptococcus thermophilus	1
GCA_025739325.1		Streptococcus thermophilus	0
GCA_025739385.1	4067	Streptococcus thermophilus	1
GCA_025948295.1	CNRZ385	Streptococcus thermophilus	1
GCA_027557675.1	EG007	Streptococcus thermophilus	1
GCA_028463905.1	strain TSGB 4141	Streptococcus thermophilus	1
GCA_028864795.1		Streptococcus thermophilus	0
GCA_029866985.1		Streptococcus thermophilus	1
GCA_030846755.1	CICC 20372	Streptococcus thermophilus	1
GCA_035758325.1	SCB0351	Streptococcus thermophilus	1
GCA_036784745.1		Streptococcus thermophilus	1
GCA_036923315.1		Streptococcus thermophilus	0
GCA_038049945.1	TCI125	Streptococcus thermophilus	2
GCA_039781665.1		Streptococcus thermophilus	0
GCA_039782795.1	90728	Streptococcus thermophilus	2
GCA_039783105.1	90729	Streptococcus thermophilus	3
GCA_039783195.1		Streptococcus thermophilus	0
GCA_039783225.1	CNRZ760	Streptococcus thermophilus	1
GCA_039783255.1	MM1	Streptococcus thermophilus	1
GCA_039783285.1	MM20	Streptococcus thermophilus	4
GCA_039783295.1	R1	Streptococcus thermophilus	1
GCA_039783405.1		Streptococcus thermophilus	0
GCA_039783475.1	AVA1121	Streptococcus thermophilus	2
GCA_039783625.1	CNRZ302	Streptococcus thermophilus	1
GCA_039783635.1		Streptococcus thermophilus	0
GCA_039783785.1		Streptococcus thermophilus	0
GCA_039783955.1	4145	Streptococcus thermophilus	1
GCA_039784265.1	1A	Streptococcus thermophilus	1
GCA_039784555.1	4021	Streptococcus thermophilus	1
GCA_039784805.1		Streptococcus thermophilus	0
GCA_039784855.1	CNRZ1202	Streptococcus thermophilus	1
GCA_039784885.1	ST128	Streptococcus thermophilus	1
GCA_039784895.1	ST55	Streptococcus thermophilus	3
GCA_039784985.1	4147	Streptococcus thermophilus	2
GCA_041509385.1	S24750	Streptococcus thermophilus	1
GCA_041510115.1	S24749	Streptococcus thermophilus	2
GCA_041510825.1	S24747	Streptococcus thermophilus	2
GCA_041511495.1	S24746	Streptococcus thermophilus	1
GCA_041512205.1	S24745	Streptococcus thermophilus	2
GCA_041512935.1	S24743	Streptococcus thermophilus	3
GCA_041513585.1	S24742	Streptococcus thermophilus	4
GCA_041514255.1	S24736	Streptococcus thermophilus	4
GCA_041514265.1	S24735	Streptococcus thermophilus	2
GCA_041514275.1		Streptococcus thermophilus	0
GCA_041514285.1	S24733	Streptococcus thermophilus	1
GCA_041514295.1	S24732	Streptococcus thermophilus	1
GCA_041514325.1	S24730	Streptococcus thermophilus	3
GCA_041514335.1	S24728	Streptococcus thermophilus	2
GCA_041514345.1	S24726	Streptococcus thermophilus	2
GCA_041514355.1		Streptococcus thermophilus	0
GCA_041893975.1	S24748	Streptococcus thermophilus	1
GCA_045159845.1	4134	Streptococcus thermophilus	1
GCA_045159855.1	MM8	Streptococcus thermophilus	2
GCA_045159865.1	RR	Streptococcus thermophilus	1
GCA_045274625.1		Streptococcus thermophilus	0
GCA_046267845.1		Streptococcus thermophilus	1
GCA_047947205.1		Streptococcus thermophilus	1
GCA_047947215.1		Streptococcus thermophilus	2
GCA_047947225.1		Streptococcus thermophilus	2
GCA_047947235.1		Streptococcus thermophilus	2
GCA_047947245.1		Streptococcus thermophilus	0
GCA_047947255.1		Streptococcus thermophilus	4
GCA_047947265.1		Streptococcus thermophilus	4
GCA_049952445.1		Streptococcus thermophilus	2
GCA_900094135.1		Streptococcus thermophilus	0
GCA_900474985.1	NCTC12958	Streptococcus thermophilus	8
GCA_900492165.1		Streptococcus thermophilus	0
GCA_903884415.1		Streptococcus thermophilus	2
GCA_903885985.1		Streptococcus thermophilus	1
GCA_903886075.1		Streptococcus thermophilus	2
GCA_903886195.1		Streptococcus thermophilus	2
GCA_903886205.1		Streptococcus thermophilus	1
GCA_903886285.1		Streptococcus thermophilus	1
GCA_903886345.1		Streptococcus thermophilus	1
GCA_903886385.1		Streptococcus thermophilus	2
GCA_903886475.1		Streptococcus thermophilus	2
GCA_903886505.1		Streptococcus thermophilus	2
GCA_903886595.1		Streptococcus thermophilus	7
GCA_903886635.1		Streptococcus thermophilus	1
GCA_903886645.1		Streptococcus thermophilus	8
GCA_903886745.1		Streptococcus thermophilus	5
GCA_903890635.1		Streptococcus thermophilus	6
GCA_903890695.1		Streptococcus thermophilus	1
GCA_903890795.1		Streptococcus thermophilus	1
GCA_903890815.1		Streptococcus thermophilus	0
GCA_903890825.1		Streptococcus thermophilus	3
GCA_903890905.1		Streptococcus thermophilus	1
GCA_903890925.1		Streptococcus thermophilus	1
GCA_903890945.1		Streptococcus thermophilus	0
GCA_903891015.1		Streptococcus thermophilus	1
GCA_903891025.1		Streptococcus thermophilus	1
GCA_903891105.1		Streptococcus thermophilus	2
GCA_903891135.1		Streptococcus thermophilus	2
GCA_903891195.1		Streptococcus thermophilus	1
GCA_903891205.1		Streptococcus thermophilus	0
GCA_903891245.1		Streptococcus thermophilus	1
GCA_903891305.1		Streptococcus thermophilus	2
GCA_903960675.1		Streptococcus thermophilus	2
GCA_000011825.1	LMG 18311	Streptococcus thermophilus	1
GCA_000011845.1	CNRZ1066	Streptococcus thermophilus	2
GCA_000014485.1	LMD-9	Streptococcus thermophilus	1
GCA_000182875.1	ND03	Streptococcus thermophilus	1
GCA_000253395.1	JIM 8232	Streptococcus thermophilus	4
GCA_000262675.1	MN-ZLW-002	Streptococcus thermophilus	1
GCA_000521265.1		Streptococcus thermophilus	6
GCA_000521285.1		Streptococcus thermophilus	1
GCA_000521305.1		Streptococcus thermophilus	1
GCA_000521325.1		Streptococcus thermophilus	2
GCA_000572065.1		Streptococcus thermophilus	0
GCA_000572095.1		Streptococcus thermophilus	5
GCA_000698885.1	ASCC 1275	Streptococcus thermophilus	2
GCA_000836595.1		Streptococcus thermophilus	1
GCA_000836675.1		Streptococcus thermophilus	4
GCA_000971665.1	SMQ-301	Streptococcus thermophilus	1
GCA_001008015.1	MN-BM-A02	Streptococcus thermophilus	1
GCA_001280285.1	MN-BM-A01	Streptococcus thermophilus	1
GCA_001514435.1	S9	Streptococcus thermophilus	1
GCA_024346585.1	TP1632	Streptococcus toyakuensis	4
GCA_002355215.1		Streptococcus troglodytae	0
GCA_002814135.1	NZ01	Streptococcus uberis	4
GCA_900475595.1	NCTC3858	Streptococcus uberis	2
GCA_900475695.1	NCTC4674	Streptococcus uberis	6
GCA_000009545.1	0140J	Streptococcus uberis	3
GCA_900636885.1	NCTC13766	Streptococcus urinalis	8
GCA_018619455.2	E653	Streptococcus vestibularis	3
GCA_900636445.1	NCTC12167	Streptococcus vestibularis	2
GCA_900636365.1	NCTC3166	Streptococcus viridans	3

## Sheet: Table_S2_Plasmid_information
Plasmid accession	Plasmid name	Species	Element size (bp)	Relaxase family	Predicted mobility category	oriT sequence	Number of ARGs	ARG(s)	Copy subtype
CP147646	S. agalactiae strain XM_1 plasmid unnamed	S. agalactiae	136811		non-mobile		0
CP138365	pR31-snf2-M	S. agalactiae	86599	MOBP1;MOBT	pCONJ		0
CP088934	pl_URK2	S. agalactiae	36593		non-mobile		0
CP026083	pYZ1605	S. agalactiae	8445		non-mobile		0
JF308629	pGB2002	S. agalactiae	6825	MOBV	pMOB	GTAAAGTATAACGCATTATACTTTACTTCGTAAATGTG	1	erm(T)
NC_001797	pGB354	S. agalactiae	6437	MOBT	pMOB	GTAAAGTATAACACACTAGACTT	1	cat(pC221)	Inc18
CP169988	pPD76_T44	S. agalactiae	5846		non-mobile		0
NC_002136	pIP501	S. agalactiae	5842		non-mobile		1	erm(B)	Inc18
NC_024973	pCCH208	S. agalactiae	4972	MOBV	pMOB	CACTTATATGAATATAAAGTATAGTATGTATACTTTTACATG	1	erm(T)
NC_015973	pGB2001	S. agalactiae	4967	MOBV	pMOB	GTAAAGTATAACGCACTATACTTTACTTCGTAAATGTG	1	erm(T)
CP012742	pNGBS128	S. agalactiae	4944		pMOB	CTTTACGAAGTAAAGTATAGTGTGTTATACTTTACATG	1	erm(T)
CP123970	S. agalactiae strain CS2108 plasmid unnamed	S. agalactiae	4440	MOBV	pMOB	CACTTTTACGAAGTAAAGTATAGTGCGTTATACTTTACATG	0
NC_001380	pLS1	S. agalactiae	4408		non-mobile		1	tet(L)	Rep2
MW118670	pZ2-336	S. agalactiae	3973	MOBV	pMOB	CTTTACGAAGTAAAGTATAGTGTGTTATACTTTACATG	0
OX460907	pZ2-265	S. agalactiae	3617		non-mobile		0
KP698941	pip501	S. agalactiae	3270		non-mobile		1	aac(6')-aph(2'')	Inc18
MW118668	pZ2-174	S. agalactiae	3041		non-mobile		0
CP114884	S. alactolyticus strain LGM plasmid unnamed1	S. alactolyticus	4732		non-mobile		0
CP114885	S. alactolyticus strain LGM plasmid unnamed2	S. alactolyticus	4565	MOBV	pMOB	CACATTTACGAAGTAAAGTATAGTGCGTTATACTTTACATG	0
CP118047	pSa_VSI52	S. anginosus	15660		pMOB	GTTGATACTATCAACTTCCCACGGAATGTGGGGACAATTTCCCTTATGCTCTTTT	0
CP118055	pSaVSI37_1	S. anginosus	12985		non-mobile		0
CP136161	pUMB8616_1	S. anginosus	9612		non-mobile		0
CP118037	pSaVSI85_1	S. anginosus	4746	MOBV	pMOB	CATGTAAAGTATAACGCACTATACTTTACTTCGTAAAAGTG	0
CP118056	pSaVSI37_2	S. anginosus	4357	MOBV	pMOB	CATGTAAAGTATAACGCACTATACTTTACTTCGTAAAAGTG	0
CP053793	S. canis strain HL_77_1 plasmid pSC77-1	S. canis	4146		pMOB	GTTGATATTATCAACTCCACACGGTACGTGGGGACAGTTTCCCTTATGCTCTTTT	0
CP053791	S. canis strain HL_77_2 plasmid pSC77-2	S. canis	5489		non-mobile		0
CP110510	S. didelphis strain LBVP101/21 plasmid unnamed	S. didelphis	38193	MOBQ	pCONJ		0
CP118097	pMGCS35922	S. dysgalactiae	47051		pCONJ		0
AP018727	pFGCSD1	S. dysgalactiae	28095		non-mobile		0
CP044103	S. dysgalactiae strain FDAARGOS_654 plasmid unnamed1	S. dysgalactiae	23315		non-mobile		0
AP018728	pFGCSD2	S. dysgalactiae	16656		non-mobile		0
CP157820	S. dysgalactiae strain S16-372 plasmid unnamed1	S. dysgalactiae	15751	MOBP1	pMOB	GGATGAACAAACAAAATACGAGAGATTTTTTGTCCGTTCATCCATGGTTTTAGAAAAAAGAGGGACGATTTCGGAAGAAGAAAATCGTCTCTTTTTTCTTCTTTTTGTATGACAAAAAGAAAGATCTTTTGCCCATTTTATTTTTATAAAATGGGTAGGTGGCGTTTGCGTAAAGCAAATCGACACAATCCAAAGGGGATAAAAGGGGAAAGTGAAAATGCCCCCTTTTCAAGCAATATTGTAATACAAGAACGAAGTGATTTGTATTACAATGTGATAGCTTGCAGTATTTATGGTTTTATATGGTCTATTTTGTTATAATGATTGTAACCGAATAGGGCGCAATGCTTATTACAAAATCAATGACAAAGGGCGATTGAGGAATGAGCGCTGGGGCAT…	0
AP018729	pFGCSD3	S. dysgalactiae	15681		non-mobile		0
AP018730	pFGCSD4	S. dysgalactiae	15413		non-mobile		0
CP095082	S. dysgalactiae strain WJ001 plasmid unnamed1	S. dysgalactiae	7628	MOBP1	pMOB	GGATGAACAAACAAAATACGAGAGATTTTTTGTCCGTTCATCCATGGTTTTAGAAAAAAGAGGGACGATTTCGGAAGAAGAAAATCGTCTCTTTTTTCTTCTTTTTGTATGACAAAAAGAAAGATCTTTTGCCCATTTTATTTTTATAAAATGGGTAGGTGGCGTTTGCGTAAAGCAAATCGACACAATCCAAAGGGGATAAAAGGGGAAAGTGAAAATGCCCCCTTTTCAAGCAATATTGTAATACAAGAACGAAGTGATTTGTATTACAATGTGATAGCTTGCAGTATTTATGGTTTTATATGGTCTATTTTGTTATAATGATTGTAACCGAATAGGGCGCAATGCTTATTACAAAATCAATGACAAAGGGCGATTGAGGAATGAGCGCTGGGGCAT…	0
CP068058	S. dysgalactiae strain FDAARGOS_1157 plasmid unnamed1	S. dysgalactiae	6534		pMOB	AAAAGAGCATAAGGGAAACTGTCCCCACATATCGTGTGGAGTTGATAGTATCAAC	0
AP018731	pFGCSD5	S. dysgalactiae	6198		non-mobile		0
CP157821	S. dysgalactiae strain S16-372 plasmid unnamed2	S. dysgalactiae	4644		non-mobile		0
CP066070	S. dysgalactiae strain FDAARGOS_1017 plasmid unnamed	S. dysgalactiae	4171		non-mobile		0
CP068059	S. dysgalactiae strain FDAARGOS_1157 plasmid unnamed2	S. dysgalactiae	3351		non-mobile		0
AY907345	pW2580	S. dysgalactiae	3043		non-mobile		0
AP023395	pSDSE159	S. dysgalactiae	3038		non-mobile		0
CP157733	S. dysgalactiae subsp. dysgalactiae strain S23-370k plasmid unnamed	S. dysgalactiae	2853		non-mobile		0
CP157736	S. dysgalactiae subsp. dysgalactiae strain A23-00193 plasmid unnamed	S. dysgalactiae	2853		non-mobile		0
CP044104	S. dysgalactiae strain FDAARGOS_654 plasmid unnamed2	S. dysgalactiae	1938		non-mobile		0
CP065055	pUnnamedse13	S. equi subsp. zooepidemicus	4723	MOBV	pMOB	CACATTTACGAAGTAAAGTATAGTACGTTATACTTTACATG	0
CP065057	pUnnamedsez14	S. equi subsp. zooepidemicus	4562	MOBV	pMOB	CATGTAAAGTATAACTTACTATACTTTACTTCGTAAATGTG	0
CP134539	S. equi subsp. equi strain XJ5012 plasmid unnamed	S. equi subsp.equi	15805		non-mobile		0
CP020439	S. equinus strain FDAARGOS_251 plasmid unamed1	S. equinus	236564		non-mobile		0
CP046630	p1_CNU_G6	S. equinus	86344		non-mobile		0
CP075173	S. equinus strain SheepZ001 plasmid plas1	S. equinus	4851		pMOB	GTTGATACTATCAACATATCACGGCACGTGATATCAGTTTCCCTTATGCTCTTTT	0
CP185764	S. equinus strain NM-A1 plasmid unnamed1	S. equinus	4671		non-mobile		0
CP185765	S. equinus strain NM-A1 plasmid unnamed2	S. equinus	3487	MOBV	pMOB	CACTTTTACGAAGTAAAGTATAGTGCGTTATACTTTACATG	0
NC_015219	pSGG1	S. gallolyticus subsp. gallolyticus	20765		pMOB	CACTTTATGAATATAAAGTATA	2	tet(O/W/32/O); tet(L)
CP118736	p29887	S. iners	10787		non-mobile		0
CP003296	pSICJ18-1	S. infantarius subsp. infantarius	19829		non-mobile		0
CP159895	S. iniae strain QMA0139 plasmid pSI1	S. iniae	30208		pMOB	GGATGAACAAACAAAATACGAGAGATTTTTGTCCGTTCATCCATGGTTTTAGAAAAAGAGGGACGATTTCGGAAGAAGAAAATCGTCTCTTTTTTTCTTCTTTTGTATGACAAAAGAAAGATCTTTTGCCCATTTTATTTTTATAAAATGGGTAGGTGGCGTTTGCGTAAAGCAAATCGACACAATCCAAAGGGGATAAAAGGGGAAAGTGAAAATGCCCCCTTTTCAAGCAATATTGTAATACAAGAACGAAGTGATTTGTATTACAATGTGATAGCTTGCAGTATTTATGGTTTTATATGGTCTATTTTGTTATAATGATTGTAACCGAATAGGGCGCAATGCTTATTACAAAATCAATGACAAAGGGCGATTGAGGAATGAGCGCTGGGGCATTTT…	0
CP125109	S. iniae strain GXAS200705 plasmid unnamed1	S. iniae	16768		non-mobile		0
CP158021	S. iniae strain QMA0139 plasmid pSI1	S. iniae	15146	MOBP1	pMOB	GGATGAACAAACAAAATACGAGAGATTTTTTGTCCGTTCATCCATGGTTTTAGAAAAAAGAGGGACGATTTCGGAAGAAGAAAATCGTCTCTTTTTTTCTTCTTTTTGTATGACAAAAAGAAAGATCTTTTGCCCATTTTATTTTTATAAAATGGGTAGGTGGCGTTTGCGTAAAGCAAATCGACACAATCCAAAGGGGATAAAAGGGGAAAGTGAAAATGCCCCCTTTTCAAGCAATATTGTAATACAAGAACGAAGTGATTTGTATTACAATGTGATAGCTTGCAGTATTTATGGTTTTATATGGTCTATTTTGTTATAATGATTGTAACCGAATAGGGCGCAATGCTTATTACAAAATCAATGACAAAGGGCGATTGAGGAATGAGCGCTGGGGCA…	0
CP024844	S. iniae strain FP5228 plasmid unnamed1	S. iniae	13781		non-mobile		2	erm(B); cat
CP119173	S. macedonicus strain SGM CIP105683 plasmid pSMA198	S. macedonicus	12729	MOBP1	pMOB	GGATGAACAAACAAAATACGAGAGATTTTTTGTTCGTTCATCCATGGTTTTAGAAAAAAGAGGGACGATTTCGGAAGAAGAAAATCGTCTCTTTTTTTTCTTCTTTTTGTATGACAAAAAGAAAGATCTTTTGCCCATTTTATTTTTATCAAATGGGCATTTGGCGTTTGCGTAAAGCAAATCGACACAATCCAAAGGGGATAAAAGGGGAAAGTGAAACTTCCCCCTTTTCAAGCCACATTGTAATACAAGAACGAAGTGCTTTGTATTACAATGTGATAGCTTGCAGTATTTATGGTTTTATATGGTCTATTTTGTTATAATGATTGTAACCGAATAGGGCGCAATGCTTATTACAAAATCAATGACAAAGGGCGATTGAGGAATGAGCGCTGGGGC…	0
CP113441	pE37_1	S. macedonicus	3337	MOBV	pMOB		0
HE613570	pSMA198	S. macedonicus	12728	MOBP1	pMOB	GGATGAACAAACAAAATACGAGAGATTTTTTGTTCGTTCATCCATGGTTTTAGAAAAAAGAGGGACGATTTCGGAAGAAGAAAATCGTCTCTTTTTTTTCTTCTTTTTGTATGACAAAAAGAAAGATCTTTTGCCCATTTTATTTTTATCAAATGGGCATTTGGCGTTTGCGTAAAGCAAATCGACACAATCCAAAGGGGATAAAAGGGGAAAGTGAAACTTCCCCCTTTTCAAGCCACATTGTAATACAAGAACGAAGTGCTTTGTATTACAATGTGATAGCTTGCCAGTATTTATGGTTTTATATGGTCTATTTTGTTATAATGATTGTAACCGAATAGGGCGCAATGCTTATTACAAAATCAATGACAAAGGGCGATTGAGGAATGAGCGCTGGGG…	0
CP015197	S. marmotae strain HTS5 plasmid unnamed 1	S. marmotae	5997		non-mobile		0
CP015198	S. marmotae strain HTS5 plasmid unnamed 2	S. marmotae	7512		non-mobile		0
CP190758	S. mitis strain E647 plasmid unnamed	S. mitis	3672	MOBV	pMOB	CACTTTTACGAAGTAAAGTATAGTGCGTTATACTTTACATG	0
CP190760	S. mitis strain E651 plasmid unnamed	S. mitis	5700		non-mobile		0
CP044494	S. mutans strain MD plasmid unnamed1	S. mutans	13108		non-mobile		3	tet(C); erm(B); catA1
CP044219	pMut1	S. mutans	7951	MOBV	pMOB		0
CP044220	pMut2	S. mutans	4688	MOBV	pMOB		0
CP069428	S. oralis strain SF100 plasmid unnamed	S. oralis	16835		non-mobile		0
CP134148	S. parasanguinis strain 30.8.10 plasmid unnamed	S. parasanguinis	9995		non-mobile		0
AP024278	pSUT-380-1	S. parasuis	25027	MOBV	pMOB		0
CP025421	S. parasuis SPOF3K plasmid unnamed	S. parasuis	23538	MOBP1	pMOB	TTTGTGATACTTCTTTATGATCCATAAATAGCCTCCTCAAAGATAAAATGCCACAGCGCTCATTCTTCAATCGCCCTTTGTCATTGATTTTGTAATAAGCATTGCGCCCTATTCGGTTACAATCATTATAACAAAATAGCAAATATAAATCAAAAAATACTGCAAGCTATCACTTTGTAATACAAAGCACTTCGTTCTTGTATTACAAAGTTGCTTGAAAAGGGGGAAGTTTCACTTTCCCCTTTTATCCCCTTTGGATTGTGTCGATTTGCTTTACGCAAACGCCACCTACCCATTTTATAAAAATAAAATGGGCAAAAGATCTTTCTTTTTGTCATACAAAAAGAAGAAAAAAAAGAGACGATTTTCTTCTTCCGAAATCGTCCCTCTTTTTTCTAA…	0
CP104191	pSPseroIa	S. parasuis	12786	MOBP1	pMOB	TTTGTGATACTTCTTTATGATCCATAAATAGCCTCCTCAAAGATAAAATGCCACAGCGCTCATTCTTCAATCGCCCTTTGTCATTGATTTTGTAATAAGCATTGCGCCCTATTCGGTTACAATCATTATAACAAAATAGCAAATATAAATCAAAAAATACTGCAAGCTATCACTTTGTAATACAAAGCACTTCGTTCTTGTATTACAAAGTTGCTTGAAAAGGGGGAAGTTTCACTTTCCCCTTTTATCCCCTTTGGATTGTGTCGATTTGCTTTACGCAAACGCCACCTACCCATTTTATAAAAATAAAATGGGCAAAAGATCTTTCTTTTTGTCATACAAAAAGAAGAAAAAAAAGAGACGATTTTCTTCTTCCGAAATCGTCCCTCTTTTTTCTAA…	0
CP195078	pAD112410	S. parasuis	12682	MOBP1	pMOB	TTTGTGATACTTCTTTATGATCCATAAATAGCCTCCTCAAAGATAAAATGCCACAGCGCTCATTCTTCAATCGCCCTTTGTCATTGATTTTGTAATAAGCATTGCGCCCTATTCGGTTACAATCATTATAACAAAATAGCAAATATAAATCAAAAAATACTGCAAGCTATCACTTTGTAATACAAAGCACTTCGTTCTTGTATTACAAAGTTGCTTGAAAAGGGGGAAGTTTCACTTTCCCCTTTTATCCCCTTTGGATTGTGTCGATTTGCTTTACGCAAACGCCACCTACCCATTTTATAAAAATAAAATGGGCAAAAGATCTTTCTTTTTGTCATACAAAAAGAAGAAAAAAAAGAGACGATTTTCTTCTTCCGAAATCGTCCCTCTTTTTTCTAA…	0
CP082784	S. parasuis strain KRS02083 plasmid unnamed1	S. parasuis	12659		pMOB	TGGATGAACAAACAAAATACGAGAGATTTTTTGTTTGTTCATCCATGGTTTTAGAAAAAAGAGGGACGATTTCGGAAGAAGAAAATCGTCTCTTTTTTTCTTCTTTTTGTATGACAAAAAGAAAGATCTTTTGCCCATTTTATTTTTATAAAATGGGTAGGTGGCGTTTGCGTAAAGCAAATCGACACAATCCAAAGGGGATAAAAGGGGAAAGTGAAACTTCCCCCTTTTCAAGCAACTTTGTAATACAAGAACGAAGTGCTTTGTATTACAAAGTGATAGCTTGCAGTATTTTTTGATTTATATTTGCTATTTTGTTATAATGATTGTAACCGAATAGGGCGCAATGCTTATTACAAAATCAATGACAAAGGGCGATTGAAGAATGAGCGCTGTGGC…	0
CP119429	pSPseroIa	S. parasuis	12578	MOBP1	pMOB	TGGATGAACAAACAAAATACGAGAGATTTTTTGTTTGTTCATCCATGGTTTTAGAAAAAAGAGGGACGATTTCGGAAGAAGAAAATCGTCTCTTTTTTTCTTCTTTTTGTATGACAAAAAGAAAGATCTTTTGCCCATTTTATTTTTATAAAATGGGTAGGTGGCGTTTGCGTAAAGCAAATCGACACAATCCAAAGGGATAAAAGGGGAAAGTGAAACTTCCCCCTTTTCAAGCAACTTTGTAATACAAGAACGAAGTGCTTTGTATTACAAAGTGATAGCTTGCAGTATTTTTTGATTTATATTTGCTATTTTGTTATAATGATTGTAACCGAATAGGGCGCAATGCTTATTACAAAATCAATGACAAAGGGCGATTGAAGAATGAGCGCTGTGGCA…	0
CP076722	pH35-cfrD	S. parasuis	7550		non-mobile		1	cfr(D)
AP024279	pSUT-380-2	S. parasuis	6937		pMOB	CTTTACGGATGTAAAGTATAGTGCGTTTATACTTTACATG	0
CP146034	S. pasteurianus strain Bang_SAM2.39.S1 plasmid unnamed1	S. pasteurianus	5260		non-mobile		0
CP136944	S. pasteurianus strain WUSP082 plasmid unnamed	S. pasteurianus	34665	MOBQ	pCONJ	AGGGCGCACTTATACCCACTAACTTACGTT	3	optrA; fexA; erm(A)	Inc18
CP161816	S. pluranimalium strain SS-15 plasmid unnamed	S. pluranimalium	29824		non-mobile		2	lnu(A); lsa(F)	Rep3
NZ_JBSOQJ010000002	S. pluranimalium strain S.PDT2410 plasmid unnamed	S. pluranimalium	5160		non-mobile		0
CP121202	pSP28	S. pluranimalium	2441		non-mobile		0
DQ198799	pHP666	S. pneumoniae	8108		non-mobile		0
CP020550	pSpn_Hu17	S. pneumoniae	6012		non-mobile		0
CP020552	pSpn_Hu15	S. pneumoniae	5427		non-mobile		0
LR595849	S. pneumoniae strain 4559 isolate 4559 plasmid 2	S. pneumoniae	5247		non-mobile		0
AF047696	pDP1	S. pneumoniae	3161		non-mobile		0
ALJW01000002	pPCS8235	S. pneumoniae	3148		non-mobile		0
AP028612	pSep6	S. pneumoniae	3133		non-mobile		0
CP050176	S. pneumoniae strain PZ900701590 plasmid unnamed	S. pneumoniae	2149		non-mobile		0
CP002926	pDRPIS7493	S. pseudopneumoniae	4727	MOBV	pMOB		0
CP141676	S. pyogenes strain CQMU_CQ01 plasmid unnamed1	S. pyogenes	59195		non-mobile		0
CP032701	pRW35-like	S. pyogenes	4968	MOBV	pMOB	CACTTATATGAATATAAAGTATAGTGTGTATACTTTACATG	1	erm(T)
CP136949	S. pyogenes strain Spyo01 plasmid unnamed	S. pyogenes	4967	MOBV	pMOB	CACTTATATGAATATAAAGTATAGTGTGTATACTTTACATG	1	erm(T)	Rep2
CP136952	S. pyogenes strain Spyo09 plasmid unnamed	S. pyogenes	4967	MOBV	pMOB	CACTTATATGAATATAAAGTATAGTGTGTATACTTTACATG	1	erm(T)	Rep2
CP154892	S. pyogenes strain 318231 plasmid unnamed	S. pyogenes	3421		non-mobile		0
CP033816	S. pyogenes strain FDAARGOS_514 plasmid unnamed	S. pyogenes	2366		non-mobile		1	erm(C)
CP044094	S. pyogenes strain FDAARGOS_668 plasmid unnamed1	S. pyogenes	1330		non-mobile		1	erm(C)
CP044095	S. pyogenes strain FDAARGOS_668 plasmid unnamed2	S. pyogenes	1229		non-mobile		1	erm(C)
CP044096	S. pyogenes strain FDAARGOS_668 plasmid unnamed3	S. pyogenes	1029		non-mobile		1	erm(C)
CP022681	S. respiraculi strain HTS25 plasmid unnamed1	S. respiraculi	26370		non-mobile		0
CP046920	p_CNU_G2	S. ruminicola	86459		non-mobile		0
CP046625	p1_CUN_G3	S. ruminicola	41625	MOBQ	pCONJ		0
CP018188	S. salivarius strain ICDC2 plasmid unnamed	S. salivarius	188293	MOBV	pMOB	CCCCTACAAACTGTTATTTGCAGTTATCTATACTCATTTGGAATTTCGATATGAAGTGTCTCACACAATAACTTCACATCATGTGCATCATTTTCATCAAACTCGTATCCCAGATGGAACATTACTTGACTATATGGTTCAATACAGGAAACCTCTATTTCCTCAATTCTTCCTTTACCC	1	lnu(C)
CP040803	pSAL813	S. salivarius	183700	MOBV	pMOB		0
CP090008	pSaLI10	S. salivarius	164439	MOBV	pMOB		0
CP054154	pIKMIN-B501	S. salivarius	138497	MOBV	pMOB		0
CP015284	S. salivarius strain ATCC 25975 plasmid unnamed	S. salivarius	126555	MOBV	pMOB		0
CP145857	pKSS1	S. salivarius	108925	MOBV	pMOB		0
CP145859	pKSS11	S. salivarius	107793	MOBV	pMOB		0
CP054155	pIKMIN-B502	S. salivarius	57714	MOBV	pMOB	CATGTAAAGTATAACGCACTATACTTTACTTCGTAAAAGTG	0
CP190756	S. salivarius strain E636 plasmid unnamed	S. salivarius	3541		non-mobile		0
CP054156	pIKMIN-B503	S. salivarius	3225	MOBV	pMOB		0
CP135592	S. sp. DTU_2020_1000888_1_SI_GRL_NUU_041A plasmid unnamed1	S. sp.	67713	MOBV	pMOB		0
CP135437	S. sp. DTU_2020_1001019_1_SI_AUS_MUR_006 plasmid unnamed1	S. sp.	23737		non-mobile		0
CP020430	S. sp. FDAARGOS_192 plasmid unnamed2	S. sp.	20536		non-mobile		0
CP116605	pHN38	S. sp.	5589		non-mobile		0
CP157577	pKHUD011	S. sp.	3730		non-mobile		0
CP193667	S. sp. KHUD_014 plasmid unnamed	S. sp.	3739		non-mobile		0
CP193664	S. sp. KHUD_016 plasmid unnamed	S. sp.	5484		non-mobile		0
CP160401	S. sp. ZY19097 plasmid unnamed1	S. sp.	7774		non-mobile		0
CP016208	S. sp. oral taxon 064 strain W10853 plasmid unnamed1	S. sp.	3415		non-mobile		0
CP016209	S. sp. oral taxon 064 strain W10853 plasmid unnamed2	S. sp.	2537		non-mobile		0
CP135064	pID32563-SS1	S. suis	54345		non-mobile		0
CP135066	pID24665-SS1	S. suis	51418		non-mobile		0
CP102150	pD13_2	S. suis	27858		non-mobile		0
CP102146	pD20_2	S. suis	26193		non-mobile		0
MT180124	pSH0918	S. suis	26155		non-mobile		1	optrA	Inc18
KX785328	S. suis strain 3366 plasmid unnamed3	S. suis	25634	MOBT	pMOB		0
NC_012923	pBM407	S. suis	24579		non-mobile		0
CP134490	S. suis strain 684_17B plasmid unnamed	S. suis	21099		non-mobile		0
CP029399	S. suis strain HN105 plasmid unnamed1	S. suis	20752		non-mobile		1	tet(O/W/32/O)
NZ_JBQWEI010000002	pSS2413	S. suis	17539		non-mobile		0
NZ_JBQWEH010000003	pSS2401	S. suis	15785		non-mobile		2	aph(3')-III; erm(B)	Rep3
CP030011	pSRD478	S. suis	15154		non-mobile		0
NZ_JBQWEH010000002	pSS2401	S. suis	11812		non-mobile		0
NZ_JAJUWV010000003	S. suis strain Ss39 plasmid unnamed1	S. suis	11776		non-mobile		1	tet(O/W/32/O)
CP012912	pNSUI060a	S. suis	11393		non-mobile		0
KC844836	pStrcfr	S. suis	8762		non-mobile		3	cfr; lnu(E); fexA
KX785329	S. suis strain 3370 plasmid unnamed1	S. suis	8354	MOBT	pMOB		1	tet(O/W/32/O)
NZ_KX785329	S. suis strain 3370 plasmid unnamed2	S. suis	8354	MOBV	pMOB		1	tet(O/W/32/O)
CP084909	S. suis strain Ssuis_MA4 plasmid unnamed	S. suis	8349		non-mobile		1	tet(O)
CP185346	S. suis strain 34391 plasmid unnamed2	S. suis	8348		non-mobile		1	tet(O)
KX785327	S. suis strain 3366 plasmid unnamed2	S. suis	8346	MOBT	pMOB		1	tet(O)
CP185355	S. suis strain 35538 plasmid unnamed	S. suis	8252		non-mobile		0
CP185357	S. suis strain 35539 plasmid unnamed	S. suis	8252		non-mobile		0
CP185367	S. suis strain 35545 plasmid unnamed	S. suis	8217		non-mobile		0
CP100433	pT15_2	S. suis	6894		non-mobile		1	vanZ
CP134475	S. suis strain PH2016-081 plasmid unnamed	S. suis	6891		non-mobile		0
CP109938	S. suis strain TRG6 plasmid unnamed	S. suis	6890		non-mobile		0
CP185345	S. suis strain 34391 plasmid unnamed1	S. suis	6879		non-mobile		1	tet(O/W/32/O)
CP102139	pS11_2	S. suis	6498		non-mobile		0
KX785321	S. suis strain 6936 plasmid unnamed1	S. suis	6497		non-mobile		1	tet(O/W/32/O)
KX785325	S. suis strain 7617 plasmid unnamed2	S. suis	6326	MOBV	pMOB		1	tet(O)
CP102144	pD43_2	S. suis	6022		non-mobile		1	erm(B)
CP082779	pSSID32098	S. suis	6003		non-mobile		0
NZ_CP082779	S. suis strain ID32098 plasmid pSSID32098	S. suis	6003		non-mobile		0
CP176419	pKKAHC01	S. suis	5796	MOBV	pMOB	CACATTTACGAAGTAAAGTATAGTGCGTTATACTTTACATG	0
NZ_JBQWEH010000005	pSS2401.4	S. suis	5754	MOBT	pMOB		0
CP102147	pD13_3	S. suis	5711	MOBT	pMOB		1	erm(B)
CP030016	pISU2812	S. suis	5586		non-mobile		0
CP012913	pNSUI060b	S. suis	5581	MOBV	pMOB	CACATTTATGAAGTAAAGTATAATGAATTATACTTTACATG	0
CP030021	pISU2514	S. suis	5581	MOBV	pMOB	CACATTTATGAAGTAAAGTATAATGAGTTATACTTTACATG	0
CP102142	pD48_2	S. suis	5459	MOBT	pMOB		1	erm(B)
KX785323	S. suis strain 3372 plasmid unnamed2	S. suis	5427	MOBT	pMOB		1	erm(B)
CP102151	pD13_3	S. suis	5318	MOBT	pMOB		1	erm(B)
CP061278	pSC262	S. suis	5125	MOBT	pMOB	CATGTAAAGTATAACCCACTATACTTTACTTCGTAAAG	1	erm(T)
CP100434	pT15_3	S. suis	5013		non-mobile		0
NZ_CP141825	S. suis strain HB18 plasmid unnamed	S. suis	5012		non-mobile		0
KX785322	S. suis strain 3372 plasmid unnamed1	S. suis	4987	MOBV	pMOB		1	tet(O/W/32/O)
KY994647	pSS90-1330	S. suis	4984	MOBV	pMOB		0
CP031378	pISU2614	S. suis	4984	MOBV	pMOB	CACATTTACGAAGTAAAGTATAATACGTTATACTTTACATG	0
AB019522	pSSU1	S. suis	4975	MOBV	pMOB		0
CP030012	pSRD478_2	S. suis	4723	MOBV	pMOB		0
CP135088	pSSID26102	S. suis	4717	MOBV	pMOB	CATGTAAAGTATAACGCACTATACTTTACCTCCGTAAAGTG	0
CP135091	pID48908-SS1	S. suis	4700	MOBV	pMOB	CACTTTACGGAGGTAAAGTATAGTGCGTTATACTTTACATG	0
CP100341	pSTC78	S. suis	4285	MOBV	pMOB		1	tet(O/W/32/O)
NZ_JBPDIT010000021	S. suis strain SS/UPM/MY/S109 plasmid unnamed1	S. suis	4285	MOBV	pMOB		0
NZ_JANUHD010000004	pC01_4	S. suis	4285	MOBV	pMOB		0
CP102153	pD11_2	S. suis	4285	MOBV	pMOB		0
CP134476	S. suis strain PH2016-081 plasmid unnamed	S. suis	4275		non-mobile		0
NZ_CP134476	S. suis strain PH2016-081 plasmid unnamed map unlocalized	S. suis	4275	MOBV	pMOB		0
CP176420	pKKAHC02	S. suis	4273	MOBV	pMOB		0
CP032065	pYSJ17	S. suis	4065		non-mobile		0
NZ_JBQWEH010000004	pSS2401.3	S. suis	3977		non-mobile		0
CP176421	pKKAHC03	S. suis	3973		non-mobile		0
NZ_JAJUWV010000004	S. suis strain Ss39 map unlocalized plasmid unnamed2 contig04	S. suis	3972		pMOB	CACATTTACGAAGTAAAGTGTAGTGCGTTACACTTTACATG	0
CP030013	pSRD478_3	S. suis	3972		non-mobile		1	tet(O)
CP176422	pKKAHC04	S. suis	3964	MOBV	pMOB	CATGTAAAGTATAACGCACTATACTTTACTTCGTAAAAGTG	0
KX785326	S. suis strain 3366 plasmid unnamed1	S. suis	3864		non-mobile		1	tet(O/W/32/O)
CP134479	S. suis strain 89-4294 plasmid unnamed	S. suis	3853		non-mobile		0
CP030014	pSRD478_4	S. suis	2945		non-mobile		0
CP176423	pKKAHC05	S. suis	2832	MOBT	pMOB	CATGTAAAGTATAATAACGCACTATACTTTACTTCGTAAAAGTG	0
CP134470	S. suis strain M104170_C2 plasmid unnamed	S. suis	2368		non-mobile		0
CP135092	pID48908-SS2	S. suis	1615		non-mobile		0
CP135067	pID24665SS2	S. suis	1060		non-mobile		1	erm(B)
CP072432	S. thermophilus strain S24745 plasmid unnamed1	S. thermophilus	118735		non-mobile		0
CP046135	p202_03	S. thermophilus	14137		non-mobile		0
CP065501	pST128A	S. thermophilus	8145		non-mobile		0
CP049054	pST64987	S. thermophilus	7976		non-mobile		0
CP065507	pCNRZ1202A	S. thermophilus	7493		non-mobile		0
CP065505	p4147A	S. thermophilus	5923		non-mobile		0
CP065508	pCNRZ1202B	S. thermophilus	5728		non-mobile		0
CP065499	pAVA116A	S. thermophilus	5430		non-mobile		0
CP065503	pST5A	S. thermophilus	5175		non-mobile		0
LR822024	S. thermophilus isolate STH_CIRM_368 plasmid paSTHERMO	S. thermophilus	4451	MOBV	pMOB	CATGTAAAGTATAACGCACTATACTTTACTTCGTAAAAGTG	0
CP102540	S. thermophilus strain TH-4 plasmid p2	S. thermophilus	4450	MOBT	pMOB		0
AY312235	pSMQ173b	S. thermophilus	4449	MOBT	pMOB		0
LR822021	S. thermophilus isolate STH_CIRM_956 plasmid paSTHERMO	S. thermophilus	4403	MOBV	pMOB	CATGTAAAGTATAACGCACTATACTTTACTTCGTAAAAGTG	0
LR822028	S. thermophilus isolate STH_CIRM_998 genome assembly, plasmid: pSTHERMO	S. thermophilus	4395	MOBV	pMOB	CACTTTTACGAAGTAAAGTATAGTGCGTTATACTTTACATG	0
LR822018	S. thermophilus isolate STH_CIRM_336 plasmid pSTHERMO	S. thermophilus	3823		non-mobile		0
LR822038	S. thermophilus isolate STH_CIRM_1121 plasmid pSTHERMO	S. thermophilus	3530		non-mobile		0
CP065494	p4021A	S. thermophilus	3529		non-mobile		0
CP069276	pSTEG007	S. thermophilus	3500		non-mobile		0
AF177168	pER36	S. thermophilus	3498		non-mobile		0
CP065497	p4067A	S. thermophilus	3385		non-mobile		0
CP000421	S. thermophilus LMD-9 plasmid 2	S. thermophilus	3361		non-mobile		0
CP102539	S. thermophilus strain TH-4 plasmid p1	S. thermophilus	3361		non-mobile		0
LR822016	S. thermophilus isolate STH_CIRM_65 plasmid pSTHERMO	S. thermophilus	3345		non-mobile		0
LR824003	S. thermophilus isolate STH_CIRM_67 plasmid pSTHERMO	S. thermophilus	3345		non-mobile		0
LR822022	S. thermophilus isolate STH_CIRM_956 plasmid pbSTHERMO	S. thermophilus	2162		pMOB	GTTGATTCTATCAACTCCCTGAGGAACGAAGGGACAGTTTCCCTTATGCTCTTTT	0
KU574030	pST0040	S. thermophilus	2780		non-mobile		0

## Sheet: Table_S3_ICE_information
Assembly Accession	Strain name	Species	MGE class	Element size (bp)	Genomic location	Insertion locus	Relaxase family	MPF type	oriT sequence	Number of ARGs	ARG(s)	GC content(%)
GCA_900187245.1	NCTC11291	S. acidominimus	ICE	69356	1350670..1420025	Mannose-6-phosphate isomerase	MOBP1,MOBV	typeFATA	NA	1	tet(O)	39.77
GCA_003966545.1	HU-GS5823	S. agalactiae	ICE	18748	945834..964581	tmRNA	profile_MOBT	typeFA	GTATGTCAACTTTTAAAGCCCATTTGACATACGCTGAAATTTTGTAAATCCCTTGTAACCAAAGGATTTTCTAATGTTTTTTTGACTGTTTCCTGTCGATTTGTACCCCCCTGTTAGATACGGGGGGTTAAGT	1	tet(M)	38.6
GCA_003966545.1	HU-GS5823	S. agalactiae	ICE	147721	1272072..1419792	rlmD	MOBP1,MOBQ	typeFATA	NA	2	aac(6')-aph(2''); erm(A)	34.94
GCA_021655535.1	GCMC97051	S. agalactiae	ICE	92601	1371534..1464134	rplL	MOBP1,MOBV	typeFATA	NA	2	erm(B); tet(O)	37.47
GCA_000782855.1	CNCTC 10/84	S. agalactiae	ICE	25827	378771..404597	rimP	MOBP1	typeFATA	NA	0		38.65
GCA_000831145.1	GBS1-NY	S. agalactiae	ICE	22795	1876927..1899721	NA	profile_MOBT	typeFA	NA	0		NA
GCA_000831145.1	GBS1-NY	S. agalactiae	ICE	69642	626100..695741	rplL	MOBP1	typeFATA	NA	0		NA
GCA_000831125.1	GBS2-NM	S. agalactiae	ICE	17527	1849864..1867390	rpmH	profile_MOBT	typeFA	GTATGTCAACTTTTAAAGCCCATTTGACATACGCTGAAATTTTGTAAATCCCTTGTAACCAAAGGATTTTCTAATGTTTTTTTGACTGTTTCCTGTCGATTTGTACCCCCCTGTTAGATACGGGGGGTTAAGT	1	tet(M)	39.12
GCA_000831125.1	GBS2-NM	S. agalactiae	ICE	68854	667176..736029	rplL	MOBP1	typeFATA	NA	0		37.56
GCA_000831105.1	GBS6	S. agalactiae	ICE	22795	1857589..1880383	rplL	profile_MOBT	typeFA	GTATGTCAACTTTTAAAGCCCATTTGACATACGCTGAAATTTTGTAAATCCCTTGTAACCAAAGGATTTTCTAATGTTTTTTTGACTGTTTCCTGTCGATTTGTACCCCCCTGTTAGATACGGGGGGTTAAGT	2	erm(B); tet(M)	37.84
GCA_000831105.1	GBS6	S. agalactiae	ICE	87744	636880..724623	NA	MOBQ,MOBP1	typeFATA	NA	0		33.81
GCA_002214425.1	C001	S. agalactiae	ICE	72196	591507..663702	NA	profile_MOBT,MOBP1	typeFA	ACTTAACCCCCCGTATCTAACAGGGGGGTACAAATCGACAGGAAACAGTCAAAAAAACATTAGAAAATCCTTTGGTTACAAGGGATTTACAAAATTTCAGCGTATGTCAAATGGGCTTTAAAAGTTGACATAC	1	tet(M)	36.45
GCA_002214425.1	C001	S. agalactiae	ICE	78431	585272..663702	rplL	profile_MOBT,MOBP1	typeFATA	ACTTAACCCCCCGTATCTAACAGGGGGGTACAAATCGACAGGAAACAGTCAAAAAAACATTAGAAAATCCTTTGGTTACAAGGGATTTACAAAATTTCAGCGTATGTCAAATGGGCTTTAAAAGTTGACATAC	0		36.65
GCA_001266635.1	GBS85147	S. agalactiae	ICE	46673	1195054..1241726	rplL	MOBP1	typeFATA	NA	0		NA
GCA_001026925.1	SS1	S. agalactiae	ICE	10108	565204..575311	tRNA-Arg	profile_MOBT	typeFA	NA	0		29.57
GCA_001592385.1	CU_GBS_08	S. agalactiae	ICE	17524	1676497..1694020	galM	profile_MOBT	typeFA	ACTTAACCCCCCGTATCTAACAGGGGGGTACAAATCGACAGGAAACAGTCAAAAAAACATTAGAAAATCCTTTGGTTACAAGGGATTTACAAAATTTCAGCGTATGTCAAATGGGCTTTAAAAGTTGACATAC	1	tet(M)	39.01
GCA_001190885.1	H002	S. agalactiae	ICE	17524	939427..956950	galM	profile_MOBT	typeFA	GTATGTCAACTTTTAAAGCCCATTTGACATACGCTGAAATTTTGTAAATCCCTTGTAACCAAAGGATTTTCTAATGTTTTTTTGACTGTTTCCTGTCGATTTGTACCCCCCTGTTAGATACGGGGGGTTAAGT	1	tet(M)	38.98
GCA_001190885.1	H002	S. agalactiae	ICE	129634	1239006..1368639	rplL	MOBP1	typeFATA	NA	0		35.64
GCA_001552035.1	NGBS128	S. agalactiae	ICE	33116	981625..1014740	ftsK	profile_MOBT	typeFA	GCCCCCTCTACCTAACAGGGGGG	1	tet(M)	35.33
GCA_001712835.1	NGBS357	S. agalactiae	ICE	85235	602480..687714	NA	MOBP1,profile_MOBT	typeFA	NA	0		NA
GCA_001712835.1	NGBS357	S. agalactiae	ICE	82927	602480..685406	NA	MOBP1,profile_MOBT	typeFATA	NA	0		NA
GCA_001448985.1	GBS ST-1	S. agalactiae	ICE	20429	612398..632826	rplL	profile_MOBT	typeFA	GTATGTCAACTTTTAAAGCCCATTTGACATACGCTGAAATTTTGTAAATCCCTTGTAACCAAAGGATTTTCTAATGTTTTTTTGACTGTTTCCTGTCGATTTGTACCCCCCTGTTAGATACGGGGGGTTAAGT	1	tet(M)	37.63
GCA_001932715.1	GBS-M002	S. agalactiae	ICE	17527	1900996..1918522	rpmH	profile_MOBT	typeFA	ACTTAACCCCCCGTATCTAACAGGGGGGTACAAATCGACAGGAAACAGTCAAAAAAACATTAGAAAATCCTTTGGTTACAAGGGATTTACAAAATTTCAGCGTATGTCAAATGGGCTTTAAAAGTTGACATAC	1	tet(M)	39
GCA_001683515.1	FWL1402	S. agalactiae	ICE	17524	1698707..1716230	galM	profile_MOBT	typeFA	ACTTAACCCCCCGTATCTAACAGGGGGGTACAAATCGACAGGAAACAGTCAAAAAAACATTAGAAAATCCTTTGGTTACAAGGGATTTACAAAATTTCAGCGTATGTCAAATGGGCTTTAAAAGTTGACATAC	1	tet(M)	39.01
GCA_001729925.2	WC1535	S. agalactiae	ICE	89494	290057..379550	rplL	MOBP1	typeFATA	NA	0		37.5
GCA_002025025.1	Sag37	S. agalactiae	ICE	70749	631785..702533	rplL	MOBP1	typeFATA	NA	4	tet(O); ant(6)-Ia; aph(3')-III; erm(B)	37.6
GCA_002025005.1	Sag158	S. agalactiae	ICE	18750	987820..1006569	tmRNA	profile_MOBT	typeFA	GTATGTCAACTTTTAAAGCCCATTTGACATACGCTGAAATTTTGTAAATCCCTTGTAACCAAAGGATTTTCTAATGTTTTTTTGACTGTTTCCTGTCGATTTGTACCCCCCTGTTAGATACGGGGGTTAAGT	1	tet(M)	38.59
GCA_002073695.2	FDAARGOS_254	S. agalactiae	ICE	22795	700983..723777	rpmH	profile_MOBT	typeFA	ACTTAACCCCCCGTATCTAACAGGGGGGTACAAATCGACAGGAAACAGTCAAAAAAACATTAGAAAATCCTTTGGTTACAAGGGATTTACAAAATTTCAGCGTATGTCAAATGGGCTTTAAAAGTTGACATAC	2	tet(M); erm(B)	37.86
GCA_002073695.2	FDAARGOS_254	S. agalactiae	ICE	53686	1856621..1910306	rlmD	MOBP1,MOBQ	typeFATA	NA	0		34.13
GCA_003287995.1	B509	S. agalactiae	ICE	18912	1612088..1630999	tmRNA	profile_MOBT	typeFA	GTATGTCAACTTTTAAAGCCCATTTGACATACGCTGAAATTTTGTAAATCCCTTGTAACCAAAGGATTTTCTAATGTTTTTTTGACTGTTTCCTGTCGATTTGTACCCCCCTGTTAGATACGGGGGGTTAAGT	1	tet(M)	38.54
GCA_003288015.1	B508	S. agalactiae	ICE	144072	1023206..1167277	rlmD	MOBP1,MOBQ	typeFATA	NA	1	erm(A)	35.02
GCA_003288015.1	B508	S. agalactiae	ICE	18751	703448..722198	tmRNA	profile_MOBT	typeFA	GTATGTCAACTTTTAAAGCCCATTTGACATACGCTGAAATTTTGTAAATCCCTTGTAACCAAAGGATTTTCTAATGTTTTTTTGACTGTTTCCTGTCGATTTGTACCCCCCTGTTAGATACGGGGGGTTAAGT	1	tet(M)	38.6
GCA_003288055.1	B507	S. agalactiae	ICE	38078	1033628..1071705	rplL	profile_MOBT,firmi_Rep_2	typeFA	GTATGTCAACTTTTAAAGCCCATTTGACATACGCTGAAATTTTGTAAATCCCTTGTAACCAAAGGATTTTCTAATGTTTTTTTGACTGTTTCCTGTCGATTTGTACCCCCCTGTTAGATACGGGGGGTTAAGT	1	tet(M)	37.06
GCA_003288075.1	B111	S. agalactiae	ICE	33146	736729..769874	rplL	MOBP1	typeFATA	NA	1	lnu(C)	33.96
GCA_003288035.1	B105	S. agalactiae	ICE	91409	652542..743950	NA	MOBP1,PHA_IME_B	typeFATA	NA	2	mef(A); msr(D)	37.57
GCA_003288035.1	B105	S. agalactiae	ICE	81496	1410348..1491843	NA	MOBP1	typeFATA	NA	6	ant(6)-Ia; erm(B); aph(3')-III; lnu(B); lsa(E); tet(O)	37.16
GCA_003288035.1	B105	S. agalactiae	ICE	32021	919964..951984	rplL	MOBP1	typeFATA	NA	0		34.77
GCA_002197205.1	CUGBS591	S. agalactiae	ICE	25794	438546..464339	NA	MOBP1	typeFATA	NA	0		38.64
GCA_002197205.1	CUGBS591	S. agalactiae	ICE	81518	644077..725594	rplL	MOBP1	typeFATA	NA	6	tet(O); ant(6)-Ia; lsa(E); lnu(B); aph(3')-III; erm(B)	37.15
GCA_002197305.1	SG-M25	S. agalactiae	ICE	67314	662320..729633	NA	MOBV,MOBP1	typeFATA	NA	2	tet(O); erm(B)	37.86
GCA_002197325.1	SG-M8	S. agalactiae	ICE	26295	442606..468900	rplL	MOBP1	typeFATA	NA	0		39.49
GCA_002197365.1	SG-M6	S. agalactiae	ICE	17527	215104..232630	rpmH	profile_MOBT	typeFA	GTATGTCAACTTTTAAAGCCCATTTGACATACGCTGAAATTTTGTAAATCCCTTGTAACCAAAGGATTTTCTAATGTTTTTTTGACTGTTTCCTGTCGATTTGTACCCCCCTGTTAGATACGGGGGGTTAAGT	1	tet(M)	39.14
GCA_002197385.1	SG-M4	S. agalactiae	ICE	75756	1196738..1272493	NA	firmi_Rep_2,MOBP1	typeFATA	NA	0		37.29
GCA_002197385.1	SG-M4	S. agalactiae	ICE	34572	873507..908078	ftsK	profile_MOBT	typeFA	GCCCCCTCTACCTAACAGGGGGG	1	tet(M)	35.48
GCA_002197385.1	SG-M4	S. agalactiae	ICE	27211	1015578..1042788	rplL	MOBP1	typeFATA	NA	0		38.54
GCA_002289205.1	874391	S. agalactiae	ICE	86142	613867..700008	NA	MOBV,MOBP1,profile_MOBT	typeFA	ACTTAACCCCCCGTATCTAACAGGGGGGTACAAATCGACAGGAAACAGTCAAAAAAATATTAGAAAATCCTTTGGTTACAAGGGATTTACAAAATTTCAGCGTATGTCAAATGGGCTTTAAAAGTTGACATAC	3	catP; tet(M); tet(L)	36.3
GCA_002289205.1	874391	S. agalactiae	ICE	86142	613867..700008	NA	MOBV,MOBP1,profile_MOBT	typeFATA	ACTTAACCCCCCGTATCTAACAGGGGGGTACAAATCGACAGGAAACAGTCAAAAAAATATTAGAAAATCCTTTGGTTACAAGGGATTTACAAAATTTCAGCGTATGTCAAATGGGCTTTAAAAGTTGACATAC	0		36.3
GCA_002812505.1	SGEHI2015-113	S. agalactiae	ICE	17524	1632738..1650261	galM	profile_MOBT	typeFA	ACTTAACCCCCCGTATCTAACAGGGGGGTACAAATCGACAGGAAACAGTCAAAAAAACATTAGAAAATCCTTTGGTTACAAGGGATTTACAAAATTTCAGCGTATGTCAAATGGGCTTTAAAAGTTGACATAC	1	tet(M)	39.02
GCA_009930895.1	YZ1605	S. agalactiae	ICE	53692	1332398..1386089	rplL	MOBP1	typeFATA	NA	0		37.01
GCA_009930915.1	NJ1606	S. agalactiae	ICE	19877	1199210..1219086	tRNA-Ser	profile_MOBT	typeFA	ACTTAACCCCCCGTATCTAACAGGGGGGTACAAATCGACAGGAAACAGTCAAAAAAACATTAGAAAATCCTTTGGTTACAAGGGATTTACAAAATTTCAGCGTATGTCAAATGGGCTTTAAAAGTTGACATAC	1	tet(M)	38.83
GCA_009930915.1	NJ1606	S. agalactiae	ICE	59008	1322545..1381552	rplL	MOBP1	typeFATA	NA	0		37.54
GCA_006716245.1	32790-3A	S. agalactiae	ICE	33115	953079..986193	ftsK	profile_MOBT	typeFA	GCCCCCTCTACCTAACAGGGGGG	1	tet(M)	35.33
GCA_006874565.1	PLGBS13	S. agalactiae	ICE	17524	591786..609309	galM	profile_MOBT	typeFA	GTATGTCAACTTTTAAAGCCCATTTGACATACGCTGAAATTTTGTAAATCCCTTGTAACCAAAGGATTTTCTAATGTTTTTTTGACTGTTTCCTGTCGATTTGTACCCCCCTGTTAGATACGGGGGGTTAAGT	1	tet(M)	39.01
GCA_003403115.1	Sag27	S. agalactiae	ICE	18751	1802829..1821579	tmRNA	profile_MOBT	typeFA	GTATGTCAACTTTTAAAGCCCATTTGACATACGCTGAAATTTTGTAAATCCCTTGTAACCAAAGGATTTTCTAATGTTTTTTTGACTGTTTCCTGTCGATTTGTACCCCCCTGTTAGATACGGGGGGTTAAGT	1	tet(M)	38.59
GCA_003403115.1	Sag27	S. agalactiae	ICE	79377	2101982..2181358	rplL	MOBP1	typeFATA	NA	0		37.44
GCA_003812805.1	FDAARGOS_512	S. agalactiae	ICE	42200	97349..139548	NA	profile_MOBT	typeFA	CCCCCCTGTTAGGTAGAGGGGGC	1	tet(M)	34.85
GCA_012222485.1	Sag153	S. agalactiae	ICE	74927	615958..690884	rplL	MOBP1	typeFATA	NA	3	ant(6)-Ia; aph(3')-III; erm(B)	37.28
GCA_019552345.1	SS1168	S. agalactiae	ICE	22079	447823..469901	rplL	MOBP1	typeFATA	AGGGGCTTGGGGATTTCCCCAACA	0		39.87
GCA_014218075.1	GBS7	S. agalactiae	ICE	17524	589494..607017	galM	profile_MOBT	typeFA	GTATGTCAACTTTTAAAGCCCATTTGACATACGCTGAAATTTTGTAAATCCCTTGTAACCAAAGGATTTTCTAATGTTTTTTTGACTGTTTCCTGTCGATTTGTACCCCCCTGTTAGATACGGGGGGTTAAGT	1	tet(M)	39.01
GCA_014218095.1	GBS11	S. agalactiae	ICE	17524	638332..655855	galM	profile_MOBT	typeFA	GTATGTCAACTTTTAAAGCCCATTTGACATACGCTGAAATTTTGTAAATCCCTTGTAACCAAAGGATTTTCTAATGTTTTTTTGACTGTTTCCTGTCGATTTGTACCCCCCTGTTAGATACGGGGGGTTAAGT	1	tet(M)	39.01
GCA_014218115.1	GBS19	S. agalactiae	ICE	22795	592148..614942	rplL	profile_MOBT	typeFA	GTATGTCAACTTTTAAAGCCCATTTGACATACGCTGAAATTTTGTAAATCCCTTGTAACCAAAGGATTTTCTAATGTTTTTTTGACTGTTTCCTGTCGATTTGTACCCCCCTGTTAGATACGGGGGGTTAAGT	2	erm(B); tet(M)	37.83
GCA_014218135.1	GBS28	S. agalactiae	ICE	20525	630996..651520	rplL	profile_MOBT	typeFA	GTATGTCAACTTTTAAAGCCCATTTGACATACGCTGAAATTTTGTAAATCCCTTGTAACCAAAGGATTTTCTAATGTTTTTTTGACTGTTTCCTGTCGATTTGTACCCCCCTGTTAGATACGGGGGGTTAAGT	1	tet(M)	39.67
GCA_008693585.1	FDAARGOS_670	S. agalactiae	ICE	68526	1081478..1150003	rplL	MOBP1,MOBV	typeFATA	NA	2	erm(B); tet(O)	37.68
GCA_008693505.1	FDAARGOS_669	S. agalactiae	ICE	42200	1846731..1888930	NA	profile_MOBT	typeFA	CCCCCCTGTTAGGTAGAGGGGGC	1	tet(M)	34.85
GCA_012593885.1	515	S. agalactiae	ICE	17524	1784778..1802301	galM	profile_MOBT	typeFA	GTATGTCAACTTTTAAAGCCCATTTGACATACGCTGAAATTTTGTAAATCCCTTGTAACCAAAGGATTTTCTAATGTTTTTTTGACTGTTTCCTGTCGATTTGTACCCCCCTGTTAGATACGGGGGGTTAAGT	1	tet(M)	38.99
GCA_021496805.1	SS114	S. agalactiae	ICE	30425	622465..652889	rplL	profile_MOBT	typeFA	GTATGTCAACTTTTAAAGCCCATTTGACATACGCTGAAATTTTGTAAATCCCTTGTAACCAAAGGATTTTCTAATGTTTTTTTGACTGTTTCCTGTCGATTTGTACCCCCCTGTTAGATACGGGGGGTTAAGT	2	erm(A); tet(M)	34.67
GCA_021496825.1	SS102	S. agalactiae	ICE	22795	592605..615399	rplL	profile_MOBT	typeFA	GTATGTCAACTTTTAAAGCCCATTTGACATACGCTGAAATTTTGTAAATCCCTTGTAACCAAAGGATTTTCTAATGTTTTTTTGACTGTTTCCTGTCGATTTGTACCCCCCTGTTAGATACGGGGGGTTAAGT	2	erm(B); tet(M)	37.83
GCA_021496845.1	SS44	S. agalactiae	ICE	30425	601649..632073	rplL	profile_MOBT	typeFA	GTATGTCAACTTTTAAAGCCCATTTGACATACGCTGAAATTTTGTAAATCCCTTGTAACCAAAGGATTTTCTAATGTTTTTTTGACTGTTTCCTGTCGATTTGTACCCCCCTGTTAGATACGGGGGGTTAAGT	2	erm(A); tet(M)	34.68
GCA_021496865.1	SS43	S. agalactiae	ICE	22737	593327..616063	rplL	profile_MOBT	typeFA	GTATGTCAACTTTTAAAGCCCATTTGACATACGCTGAAATTTTGTAAATCCCTTGTAACCAAAGGATTTTCTAATGTTTTTTTGACTGTTTCCTGTCGATTTGTACCCCCCTGTTAGATACGGGGGGTTAAGT	2	erm(B); tet(M)	37.85
GCA_021496885.1	GBS68	S. agalactiae	ICE	22079	447719..469797	rplL	MOBP1	typeFATA	AGGGGCTTGGGGATTTCCCCAACA	0		39.87
GCA_021496885.1	GBS68	S. agalactiae	ICE	17524	1885114..1902637	galM	profile_MOBT	typeFA	GTATGTCAACTTTTAAAGCCCATTTGACATACGCTGAAATTTTGTAAATCCCTTGTAACCAAAGGATTTTCTAATGTTTTTTTGACTGTTTCCTGTCGATTTGTACCCCCCTGTTAGATACGGGGGGTTAAGT	1	tet(M)	39.01
GCA_021496885.1	GBS68	S. agalactiae	ICE	58312	1233464..1291775	NA	firmi_Rep_2,MOBP1	typeFATA	NA	0		31.02
GCA_021496905.1	GBS20	S. agalactiae	ICE	17524	592989..610512	galM	profile_MOBT	typeFA	GTATGTCAACTTTTAAAGCCCATTTGACATACGCTGAAATTTTGTAAATCCCTTGTAACCAAAGGATTTTCTAATGTTTTTTTGACTGTTTCCTGTCGATTTGTACCCCCCTGTTAGATACGGGGGGTTAAGT	1	tet(M)	39
GCA_021496945.1	SS111	S. agalactiae	ICE	30425	622465..652889	rplL	profile_MOBT	typeFA	GTATGTCAACTTTTAAAGCCCATTTGACATACGCTGAAATTTTGTAAATCCCTTGTAACCAAAGGATTTTCTAATGTTTTTTTGACTGTTTCCTGTCGATTTGTACCCCCCTGTTAGATACGGGGGGTTAAGT	2	erm(A); tet(M)	34.67
GCA_021496965.1	GBS47	S. agalactiae	ICE	17524	1827850..1845373	galM	profile_MOBT	typeFA	GTATGTCAACTTTTAAAGCCCATTTGACATACGCTGAAATTTTGTAAATCCCTTGTAACCAAAGGATTTTCTAATGTTTTTTTGACTGTTTCCTGTCGATTTGTACCCCCCTGTTAGATACGGGGGGTTAAGT	1	tet(M)	39.01
GCA_021496965.1	GBS47	S. agalactiae	ICE	22079	447722..469800	rplL	MOBP1	typeFATA	AGGGGCTTGGGGATTTCCCCAACA	0		39.86
GCA_013414325.1	S9968	S. agalactiae	ICE	18748	1638533..1657280	tmRNA	profile_MOBT	typeFA	GTATGTCAACTTTTAAAGCCCATTTGACATACGCTGAAATTTTGTAAATCCCTTGTAACCAAAGGATTTTCTAATGTTTTTTTGACTGTTTCCTGTCGATTTGTACCCCCCTGTTAGATACGGGGGGTTAAGT	1	tet(M)	38.61
GCA_013414325.1	S9968	S. agalactiae	ICE	26458	777445..803902	tRNA-Lys	MOBT,MOBP1	typeFATA	NA	0		38.64
GCA_013414325.1	S9968	S. agalactiae	ICE	79042	1938028..2017069	rplL	MOBP1	typeFATA	NA	0		37.43
GCA_013786965.1	BJ01	S. agalactiae	ICE	18751	1299740..1318490	tmRNA	profile_MOBT	typeFA	ACTTAACCCCCCGTATCTAACAGGGGGGTACAAATCGATAGGAAACAGTCAAAAAAACATTAGAAAATCCTTTGGTTACAAGGGATTTACAAAATTTCAGCGTATGTCAAATGGGCTTTAAAAGTTGACATAC	1	tet(M)	38.58
GCA_015221735.2	CJB111	S. agalactiae	ICE	17524	591422..608945	galM	profile_MOBT	typeFA	GTATGTCAACTTTTAAAGCCCATTTGACATACGCTGAAATTTTGTAAATCCCTTGTAACCAAAGGATTTTCTAATGTTTTTTTGACTGTTTCCTGTCGATTTGTACCCCCCTGTTAGATACGGGGGGTTAAGT	1	tet(M)	39.01
GCA_021460175.1	MIN-181	S. agalactiae	ICE	17524	838929..856452	galM	profile_MOBT	typeFA	GTATGTCAACTTTTAAAGCCCATTTGACATACGCTGAAATTTTGTAAATCCCTTGTAACCAAAGGATTTTCTAATGTTTTTTTGACTGTTTCCTGTCGATTTGTACCCCCCTGTTAGATACGGGGGGTTAAGT	1	tet(M)	38.99
GCA_021460195.1	MIN-180	S. agalactiae	ICE	34449	947938..982386	ftsK	profile_MOBT	typeFA	GCCCCCTCTACCTAACAGGGGGG	1	tet(M)	35.48
GCA_021165795.1		S. agalactiae	ICE	22796	629052..651847	rplL	profile_MOBT	typeFA	GTATGTCAACTTTTAAAGCCCATTTGACATACGCTGAAATTTTGTAAATCCCTTGTAACCAAAGGATTTTCTAATGTTTTTTTGACTGTTTCCTGTCGATTTGTACCCCCCTGTTAGATACGGGGGGTTAAGT	2	erm(B); tet(M)	37.84
GCA_031202875.1	BCJB4361	S. agalactiae	ICE	79889	270707..350595	rpsI	MOBP1	typeFATA	NA	0		31.31
GCA_031202875.1	BCJB4361	S. agalactiae	ICE	35130	1560384..1595513	rplL	MOBP1	typeFATA	NA	0		37.97
GCA_031202895.1	BCJB3586	S. agalactiae	ICE	99038	1291669..1390706	rplL	firmi_Rep_2,MOBP1	typeFATA	NA	1	erm(A)	33.65
GCA_031202895.1	BCJB3586	S. agalactiae	ICE	17524	623255..640778	galM	profile_MOBT	typeFA	ACTTAACCCCCCGTATCTAACAGGGGGGTACAAATCGACAGGAAACAGTCAAAAAAACATTAGAAAATCCTTTGGTTACAAGGGATTTACAAAATTTCAGCGTATGTCAAATGGGCTTTAAAAGTTGACATAC	1	tet(M)	39.11
GCA_031203395.1	BCJB3344	S. agalactiae	ICE	99038	1293081..1392118	rplL	firmi_Rep_2,MOBP1	typeFATA	NA	1	erm(A)	33.65
GCA_031203395.1	BCJB3344	S. agalactiae	ICE	17524	622885..640408	galM	profile_MOBT	typeFA	ACTTAACCCCCCGTATCTAACAGGGGGGTACAAATCGACAGGAAACAGTCAAAAAAACATTAGAAAATCCTTTGGTTACAAGGGATTTACAAAATTTCAGCGTATGTCAAATGGGCTTTAAAAGTTGACATAC	1	tet(M)	39.11
GCA_031203715.1	BCJB1835	S. agalactiae	ICE	99037	1295222..1394258	rplL	firmi_Rep_2,MOBP1	typeFATA	NA	1	erm(A)	33.65
GCA_031203715.1	BCJB1835	S. agalactiae	ICE	17524	624239..641762	galM	profile_MOBT	typeFA	ACTTAACCCCCCGTATCTAACAGGGGGGTACAAATCGACAGGAAACAGTCAAAAAAACATTAGAAAATCCTTTGGTTACAAGGGATTTACAAAATTTCAGCGTATGTCAAATGGGCTTTAAAAGTTGACATAC	1	tet(M)	39.11
GCA_025402735.1	TAH 10/84	S. agalactiae	ICE	25827	378727..404553	rimP	MOBP1	typeFATA	NA	0		38.65
GCA_025402755.1	TAH 10/84 dUdp	S. agalactiae	ICE	25827	378697..404523	rimP	MOBP1	typeFATA	NA	0		38.65
GCA_025402775.1	TAH 10/84 dMrvR	S. agalactiae	ICE	25827	378733..404559	rimP	MOBP1	typeFATA	NA	0		38.65
GCA_025808195.1	SA5087	S. agalactiae	ICE	18751	972517..991267	tmRNA	profile_MOBT	typeFA	GTATGTCAACTTTTAAAGCCCATTTGACATACGCTGAAATTTTGTAAATCCCTTGTAACCAAAGGATTTTCTAATGTTTTTTTGACTGTTTCCTGTCGATTTGTACCCCCCTGTTAGATACGGGGGGTTAAGT	1	tet(M)	38.6
GCA_025808195.1	SA5087	S. agalactiae	ICE	149338	1335257..1484594	rplL	MOBP1,MOBQ	typeFATA	NA	4	catQ; msr(D); mef(A); erm(A)	35.64
GCA_030078235.1	CNCTC 10/84 dCas9	S. agalactiae	ICE	25827	378763..404589	rimP	MOBP1	typeFATA	NA	0		38.65
GCA_030078295.1	CNCTC 10/84 sCas9	S. agalactiae	ICE	25827	378763..404589	rimP	MOBP1	typeFATA	NA	0		38.65
GCA_030078315.1	CNCTC 10/84 sCas9revertant	S. agalactiae	ICE	25827	378768..404594	rimP	MOBP1	typeFATA	NA	0		38.65
GCA_030078355.1	CNCTC 10/84 Cas9 AEKOrevertant	S. agalactiae	ICE	25827	378752..404578	rimP	MOBP1	typeFATA	NA	0		38.65
GCA_030078375.1	CNCTC 10/84 Cas9 AEKO	S. agalactiae	ICE	25827	378751..404577	rimP	MOBP1	typeFATA	NA	0		38.65
GCA_029011195.1	VSI63	S. agalactiae	ICE	68379	641625..710003	NA	MOBV,MOBP1	typeFATA	NA	2	tet(O); erm(B)	37.76
GCA_029011635.1	VSI15	S. agalactiae	ICE	74948	630519..705466	rplL	MOBP1	typeFATA	NA	4	tet(O); ant(6)-Ia; aph(3')-III; erm(B)	37.28
GCA_029011675.1	VSI14	S. agalactiae	ICE	74948	630519..705466	rplL	MOBP1	typeFATA	NA	4	tet(O); ant(6)-Ia; aph(3')-III; erm(B)	37.28
GCA_029278525.1	Guangzhou-SAG092	S. agalactiae	ICE	17524	732652..750175	galM	profile_MOBT	typeFA	ACTTAACCCCCCGTATCTAACAGGGGGGTACAAATCGACAGGAAACAGTCAAAAAAACATTAGAAAATCCTTTGGTTACAAGGGATTTACAAAATTTCAGCGTATGTCAAATGGGCTTTAAAAGTTGACATAC	1	tet(M)	38.99
GCA_029278525.1	Guangzhou-SAG092	S. agalactiae	ICE	80726	885762..966487	NA	MOBP1	typeFATA	NA	0		37.7
GCA_029278525.1	Guangzhou-SAG092	S. agalactiae	ICE	68291	1557491..1625781	NA	MOBP1,MOBV	typeFATA	NA	1	tet(O)	37.61
GCA_029278525.1	Guangzhou-SAG092	S. agalactiae	ICE	32021	1886092..1918112	rplL	MOBP1	typeFATA	NA	0		34.77
GCA_029537275.1	Guangzhou-SAG036	S. agalactiae	ICE	70829	636391..707219	rplL	MOBP1	typeFATA	NA	4	tet(O); ant(6)-Ia; aph(3')-III; erm(B)	37.59
GCA_029537275.1	Guangzhou-SAG036	S. agalactiae	ICE	92322	1327040..1419361	NA	PHA_IME_B,MOBP1	typeFATA	NA	2	msr(D); mef(A)	37.62
GCA_029917085.1	CS2108	S. agalactiae	ICE	72181	1434411..1506591	rplL	MOBP1	typeFATA	NA	0		38.21
GCA_049803895.1	AR977	S. agalactiae	ICE	25092	730106..755197	rplL	MOBP1	typeFATA	TTGTTGGGGAAATCCCCAAGCCCCT	0		39.41
GCA_030908345.1	18/19-02	S. agalactiae	ICE	17525	1725736..1743260	rpmH	profile_MOBT	typeFA	ACTTAACCCCCCGTATCTAACAGGGGGGTACAAATCGACAGGAAACAGTCAAAAAAACATTAGAAAATCCTTTGGTTACAAGGGATTTACAAAATTTCAGCGTATGTCAAATGGGCTTTAAAAGTTGACATAC	0		39
GCA_046529655.1	MA07	S. agalactiae	ICE	17524	1538913..1556436	galM	profile_MOBT	typeFA	GTATGTCAACTTTTAAAGCCCATTTGACATACGCTGAAATTTTGTAAATCCCTTGTAACCAAAGGATTTTCTAATGTTTTTTTGACTGTTTCCTGTCGATTTGTACCCCCCTGTTAGATACGGGGGGTTAAGT	1	tet(M)	38.99
GCA_046529645.1	HU05/19	S. agalactiae	ICE	72173	559375..631547	NA	MOBQ,MOBV,MOBP1	typeFATA	NA	1	tet(O)	35.54
GCA_046529645.1	HU05/19	S. agalactiae	ICE	81003	1222250..1303252	rplL	MOBP1	typeFATA	NA	0		37.72
GCA_046529665.1	HU13/21	S. agalactiae	ICE	57207	1188172..1245378	rplL	MOBP1	typeFATA	NA	0		38.37
GCA_046529675.1	HU32/21	S. agalactiae	ICE	57203	1126743..1183945	rplL	MOBP1	typeFATA	NA	0		38.31
GCA_046529685.1	HU36/21	S. agalactiae	ICE	17519	1134031..1151549	NA	profile_MOBT	typeFA	ACTTAACCCCCGTATCTAACAGGGGGTACAAATCGACAGGAAACAGTCAAAAAAACATTAGAAAATCCTTTGGTTACAAGGGATTTACAAAATTTCAGCGTATGTCAAATGGGCTTTAAAAGTTGACATAC	0		38.99
GCA_046529705.1	MA15	S. agalactiae	ICE	18751	838463..857213	tmRNA	profile_MOBT	typeFA	GTATGTCAACTTTTAAAGCCCATTTGACATACGCTGAAATTTTGTAAATCCCTTGTAACCAAAGGATTTTCTAATGTTTTTTTGACTGTTTCCTGTCGATTTGTACCCCCCTGTTAGATACGGGGGGTTAAGT	1	tet(M)	38.62
GCA_046529705.1	MA15	S. agalactiae	ICE	135522	1138776..1274297	rplL	MOBP1,MOBQ	typeFATA	NA	3	catQ; mef(A); erm(A)	35.99
GCA_033798805.1	R31-snf2-MTast1	S. agalactiae	ICE	45691	1806345..1852035	NA	profile_MOBT,firmi_Rep_2	typeFA	ACTTAACCCCCGTATCTAACAGGGGGGTACAAATCGACAGGAAACAGTCAAAAAAACATTAGAAAATCCTTTGGTTACAAGGGATTTACAAAATTTCAGCGTATGTCAAATGGGCTTTAAAAGTTGACATAC	1	tet(M)	36.96
GCA_033798805.1	R31-snf2-MTast1	S. agalactiae	ICE	84059	1012393..1096451	galM	firmi_Rep_2,profile_MOBT,MOBP1	typeFATA	GTATGTCAACTTTTAAAGCCCATTTGACATACGCTGAAATTTTGTAAATCCCTTGTAACCAAAGGATTTTCTAATGTTTTTTTGACTGTTTCCTGTCGATTTGTACCCCCCTGTTAGATACGGGGGTTAAGT	0		35.1
GCA_033798805.1	R31-snf2-MTast1	S. agalactiae	ICE	61279	16619..77897	rplL	MOBP1,profile_MOBT	typeFATA	ACTTAACCCCCGTATCTAACAGGGGGGTACAAATCGACAGGAAACAGTCAAAAAAACATTAGAAAATCCTTTGGTTACAAGGGATTTACAAAATTTCAGCGTATGTCAAATGGGCTTTAAAAGTTGACATAC	1	erm(B)	34.1
GCA_033798825.1	R92-rpsI	S. agalactiae	ICE	18763	249437..268199	tmRNA	profile_MOBT	typeFA	ACTTAACCCCCCGTATCTAACAGGGGGGTACAAATCGACAGGAAACAGTCAAAAAAACATTAGAAAATCCTTTGGTTACAAGGGATTTACAAAATTTCAGCGTATGTCAAATGGGCTTTAAAAGTTGACATAC	1	tet(M)	38.59
GCA_033798825.1	R92-rpsI	S. agalactiae	ICE	78526	999167..1077692	tRNA-Leu	MOBT,MOBV,MOBP1	typeFATA	GTATGTCAACTTTTAAAGCCCATTTGACATACGCTGAAATTTTGTAAATCCCTTGTAACCAAAGGATTTTCTAATGTTTTTTTGACTGTTTCCTGTCGATTTGTACCCCCCTGTTAGATACGGGGGTTAAGT	1	erm(B)	34.02
GCA_033798845.1	R31-snf2-MTase2	S. agalactiae	ICE	17527	2085051..2102577	rpmH	profile_MOBT	typeFA	ACTTAACCCCCCGTATCTAACAGGGGGGTACAAATCGACAGGAAACAGTCAAAAAAACATTAGAAAATCCTTTGGTTACAAGGGATTTACAAAATTTCAGCGTATGTCAAATGGGCTTTAAAAGTTGACATAC	1	tet(M)	39
GCA_033798845.1	R31-snf2-MTase2	S. agalactiae	ICE	75853	232532..308384	tRNA-Ala	MOBP1,profile_MOBT	typeFATA	ACTTAACCCCCCGTATCTAACAGGGGGGTACAAATCGACAGGAAACAGTCAAAAAAACATTAGAAAATCCTTTGGTTACAAGGGATTTACAAAATTTCAGCGTATGTCAAATGGGCTTTAAAAGTTGACATAC	1	erm(B)	34.3
GCA_033798845.1	R31-snf2-MTase2	S. agalactiae	ICE	131027	1243958..1374984	rplL	firmi_Rep_2,MOBP1,profile_MOBT	typeFATA	GTATGTCAACTTTTAAAGCCCATTTGACATACGCTGAAATTTTGTAAATCCCTTGTAACCAAAGGATTTTCTAATGTTTTTTTGACTGTTTCCTGTCGATTTGTACCCCCCTGTTAGATACGGGGGGTTAAGT	3	msr(D); mef(A); erm(B)	36.07
GCA_033798865.1	SagR92	S. agalactiae	ICE	18763	1823919..1842681	tmRNA	profile_MOBT	typeFA	GTATGTCAACTTTTAAAGCCCATTTGACATACGCTGAAATTTTGTAAATCCCTTGTAACCAAAGGATTTTCTAATGTTTTTTTGACTGTTTCCTGTCGATTTGTACCCCCCTGTTAGATACGGGGGGTTAAGT	1	tet(M)	38.59
GCA_033798885.1	SagR31	S. agalactiae	ICE	17527	1984593..2002119	rpmH	profile_MOBT	typeFA	ACTTAACCCCCCGTATCTAACAGGGGGGTACAAATCGACAGGAAACAGTCAAAAAAACATTAGAAAATCCTTTGGTTACAAGGGATTTACAAAATTTCAGCGTATGTCAAATGGGCTTTAAAAGTTGACATAC	1	tet(M)	39
GCA_033798885.1	SagR31	S. agalactiae	ICE	80799	1193728..1274526	rplL	firmi_Rep_2,MOBP1	typeFATA	NA	2	msr(D); mef(A)	37.83
GCA_033798905.1	SagR40	S. agalactiae	ICE	17523	1141133..1158655	rplL	profile_MOBT	typeFA	ACTTAACCCCCGTATCTAACAGGGGGGTACAAATCGACAGGAAACAGTCAAAAAAACATTAGAAAATCCTTTGGTTACAAGGGATTTACAAAATTTCAGCGTATGTCAAATGGGCTTTAAAAGTTGACATAC	1	tet(M)	38.98
GCA_033798925.1	R31-snf2	S. agalactiae	ICE	131027	1193740..1324766	rplL	firmi_Rep_2,MOBP1,profile_MOBT	typeFATA	GTATGTCAACTTTTAAAGCCCATTTGACATACGCTGAAATTTTGTAAATCCCTTGTAACCAAAGGATTTTCTAATGTTTTTTTGACTGTTTCCTGTCGATTTGTACCCCCCTGTTAGATACGGGGGGTTAAGT	3	msr(D); mef(A); erm(B)	36.07
GCA_033798925.1	R31-snf2	S. agalactiae	ICE	17527	2034833..2052359	rpmH	profile_MOBT	typeFA	ACTTAACCCCCCGTATCTAACAGGGGGGTACAAATCGACAGGAAACAGTCAAAAAAACATTAGAAAATCCTTTGGTTACAAGGGATTTACAAAATTTCAGCGTATGTCAAATGGGCTTTAAAAGTTGACATAC	1	tet(M)	39
GCA_034329605.1	SagR40_TC	S. agalactiae	ICE	17523	603762..621284	galM	profile_MOBT	typeFA	GTATGTCAACTTTTAAAGCCCATTTGACATACGCTGAAATTTTGTAAATCCCTTGTAACCAAAGGATTTTCTAATGTTTTTTTGACTGTTTCCTGTCGATTTGTACCCCCCTGTTAGATACGGGGGTTAAGT	1	tet(M)	38.98
GCA_034329605.1	SagR40_TC	S. agalactiae	ICE	62070	404546..466615	rplL	firmi_Rep_2,profile_MOBT,MOBP1	typeFATA	GTATGTCAACTTTTAAAGCCCATTTGACATACGCTGAAATTTTGTAAATCCCTTGTAACCAAAGGATTTTCTAATGTTTTTTTGACTGTTTCCTGTCGATTTGTACCCCCCTGTTAGATACGGGGGGTTAAGT	1	erm(B)	33.04
GCA_050916465.1	SA001	S. agalactiae	ICE	64861	437301..502161	rlmD	MOBV,MOBP1	typeFATA	NA	1	tet(O)	38.09
GCA_050916535.1	NN168	S. agalactiae	ICE	64861	741685..806545	rlmD	MOBV,MOBP1	typeFATA	NA	1	tet(O)	38.09
GCA_050916555.1	NN067	S. agalactiae	ICE	64939	325478..390416	NA	MOBV,MOBP1	typeFATA	NA	1	tet(O)	38.07
GCA_050916565.1	GZ289	S. agalactiae	ICE	64861	644681..709541	rlmD	MOBV,MOBP1	typeFATA	NA	1	tet(O)	38.09
GCA_037217205.1	XM_1	S. agalactiae	ICE	131206	358913..490118	NA	MOBQ,MOBP1	typeFATA	NA	4	tet(O); ant(6)-Ia; aph(3')-III; erm(B)	36.11
GCA_037240675.1	SagR40_TC_rplL	S. agalactiae	ICE	77723	1850841..1928563	rplL	MOBP1	typeFATA	ACTTAACCCCCGTATCTAACAGGGGGGTACAAATCGACAGGAAACAGTCAAAAAAACATTAGAAAATCCTTTGGTTACAAGGGATTTACAAAATTTCAGCGTATGTCAAATGGGCTTTAAAAGTTGACATAC	1	erm(B)	36.1
GCA_037240675.1	SagR40_TC_rplL	S. agalactiae	ICE	17524	1697760..1715283	galM	profile_MOBT	typeFA	ACTTAACCCCCCGTATCTAACAGGGGGGTACAAATCGACAGGAAACAGTCAAAAAAACATTAGAAAATCCTTTGGTTACAAGGGATTTACAAAATTTCAGCGTATGTCAAATGGGCTTTAAAAGTTGACATAC	1	tet(M)	38.98
GCA_037244275.1	SagR92_TC_rpsI	S. agalactiae	ICE	18762	292215..310976	tmRNA	profile_MOBT	typeFA	ACTTAACCCCCGTATCTAACAGGGGGGTACAAATCGACAGGAAACAGTCAAAAAAACATTAGAAAATCCTTTGGTTACAAGGGATTTACAAAATTTCAGCGTATGTCAAATGGGCTTTAAAAGTTGACATAC	1	tet(M)	38.59
GCA_037244275.1	SagR92_TC_rpsI	S. agalactiae	ICE	77726	2090519..2168244	rplL	MOBP1,profile_MOBT	typeFATA	ACTTAACCCCCGTATCTAACAGGGGGGTACAAATCGACAGGAAACAGTCAAAAAAACATTAGAAAATCCTTTGGTTACAAGGGATTTACAAAATTTCAGCGTATGTCAAATGGGCTTTAAAAGTTGACATAC	1	erm(B)	36.09
GCA_037248035.1	SagR266	S. agalactiae	ICE	18763	495160..513922	tmRNA	profile_MOBT	typeFA	GTATGTCAACTTTTAAAGCCCATTTGACATACGCTGAAATTTTGTAAATCCCTTGTAACCAAAGGATTTTCTAATGTTTTTTTGACTGTTTCCTGTCGATTTGTACCCCCCTGTTAGATACGGGGGGTTAAGT	1	tet(M)	38.59
GCA_037246145.1	SagR266_TC_rplL	S. agalactiae	ICE	77723	89313..167035	rplL	MOBP1,profile_MOBT	typeFATA	ACTTAACCCCCGTATCTAACAGGGGGGTACAAATCGACAGGAAACAGTCAAAAAAACATTAGAAAATCCTTTGGTTACAAGGGATTTACAAAATTTCAGCGTATGTCAAATGGGCTTTAAAAGTTGACATAC	1	erm(B)	36.1
GCA_037246145.1	SagR266_TC_rplL	S. agalactiae	ICE	18762	493209..511970	tmRNA	profile_MOBT	typeFA	ACTTAACCCCCGTATCTAACAGGGGGGTACAAATCGACAGGAAACAGTCAAAAAAACATTAGAAAATCCTTTGGTTACAAGGGATTTACAAAATTTCAGCGTATGTCAAATGGGCTTTAAAAGTTGACATAC	1	tet(M)	38.59
GCA_037242635.1	SagR272_TC	S. agalactiae	ICE	91242	55598..146839	rplL	MOBP1,profile_MOBT,firmi_Rep_2	typeFA	ACTTAACCCCCCGTATCTAACAGGGGGGTACAAATCGACAGGAAACAGTCAAAAAAACATTAGAAAATCCTTTGGTTACAAGGGATTTACAAAATTTCAGCGTATGTCAAATGGGCTTTAAAAGTTGACATAC	2	erm(B); tet(M)	34.94
GCA_037242635.1	SagR272_TC	S. agalactiae	ICE	91724	55116..146839	rplL	MOBP1,profile_MOBT,firmi_Rep_2	typeFATA	ACTTAACCCCCCGTATCTAACAGGGGGGTACAAATCGACAGGAAACAGTCAAAAAAACATTAGAAAATCCTTTGGTTACAAGGGATTTACAAAATTTCAGCGTATGTCAAATGGGCTTTAAAAGTTGACATAC	0		34.91
GCA_039614755.1		S. agalactiae	ICE	33230	769989..803218	ftsK	profile_MOBT	typeFA	GCCCCCTCTACCTAACAGGGGGG	1	tet(M)	35.35
GCA_040783455.1	QMA0539	S. agalactiae	ICE	17516	674862..692377	NA	profile_MOBT	typeFA	GTATGTCAACTTTTAAAGCCCATTTGACATACGCTGAAATTTTGTAAATCCCTTGTAACCAAAGGATTTTCTAATGTTTTTTTGACTGTTTCCTGTCGATTTGTACCCCCTGTTAGATACGGGGGTTAAGT	0		39.01
GCA_041804565.1	GBS-B4009	S. agalactiae	ICE	18751	1027105..1045855	tmRNA	profile_MOBT	typeFA	GTATGTCAACTTTTAAAGCCCATTTGACATACGCTGAAATTTTGTAAATCCCTTGTAACCAAAGGATTTTCTAATGTTTTTTTGACTGTTTCCTGTCGATTTGTACCCCCCTGTTAGATACGGGGGGTTAAGT	1	tet(M)	38.6
GCA_041804565.1	GBS-B4009	S. agalactiae	ICE	155845	1327119..1482963	rlmD	MOBP1,MOBQ	typeFATA	NA	2	msr(D); mef(A)	33.73
GCA_050367445.1	T44	S. agalactiae	ICE	27136	1028721..1055856	rplL	MOBP1	typeFATA	NA	0		38.61
GCA_050367445.1	T44	S. agalactiae	ICE	66816	533789..600604	NA	MOBV,MOBP1	typeFATA	NA	1	tet(O)	37.67
GCA_047783005.1	M18	S. agalactiae	ICE	103693	97278..200970	tRNA-Leu	MOBP1	typeFATA	NA	0		36.67
GCA_047783005.1	M18	S. agalactiae	ICE	84051	1374080..1458130	rplL	MOBP1,MOBV	typeFATA	NA	1	tet(O)	37.38
GCA_047783015.1	M14	S. agalactiae	ICE	34476	423384..457859	NA	profile_MOBT	typeFA	CCCCCTGTTAGGTAGAGGGGGC	1	tet(M)	35.48
GCA_000689235.1	COH1	S. agalactiae	ICE	33236	916025..949260	ftsK	profile_MOBT	typeFA	GCCCCCTCTACCTAACAGGGGGG	1	tet(M)	35.34
GCA_900636375.1	NCTC8184	S. agalactiae	ICE	19945	1175734..1195678	rplL	MOBP1	typeFATA	NA	0		39.8
GCA_900636375.1	NCTC8184	S. agalactiae	ICE	60099	1066960..1127058	NA	MOBP1	typeFATA	NA	0		37.86
GCA_900474905.1	NCTC11930	S. agalactiae	ICE	17520	1634117..1651636	rplL	profile_MOBT	typeFA	GTATGTCAACTTTTAAAGCCCATTTGACATACGCTGAAATTTTGTAAATCCCTTGTAACCAAAGGATTTTCTAATGTTTTTTTGACTGTTTCCTGTCGATTTGTACCCCCCTGTTAGATACGGGGGGTTAAGT	1	tet(M)	38.96
GCA_900475355.1	NCTC8187	S. agalactiae	ICE	28175	1224396..1252570	NA		typeFATA	NA	0		40.2
GCA_000478925.1	MAS624	S. anginosus	ICE	40010	362525..402534	NA	MOBQ,MOBP1	typeFATA	NA	0		34.83
GCA_000478925.1	MAS624	S. anginosus	ICE	60414	1915262..1975675	tRNA-Lys	MOBP1	typeFATA	NA	0		32.96
GCA_023169525.1	CCUG 27928	S. anginosus	ICE	25996	1400370..1426365	SEC10/PgrA	MOBP1	typeFATA	NA	0		38.13
GCA_023169525.1	CCUG 27928	S. anginosus	ICE	25996	1479347..1505342	SEC10/PgrA	MOBP1	typeFATA	NA	0		38.13
GCA_023169525.1	CCUG 27928	S. anginosus	ICE	49634	1152363..1201996	rlmD	MOBP1,MOBQ	typeFATA	NA	0		34.07
GCA_000463505.1	C238	S. anginosus	ICE	17526	1107834..1125359	rplL	profile_MOBT	typeFA	GTATGTCAACTTTTAAAGCCCATTTGACATACGCTGAAATTTTGTAAATCCCTTGTAACCAAAGGATTTTCTAATGTTTTTTTGACTGTTTCCTGTCGATTTGTACCCCCCTGTTAGATACGGGGGGTTAAGT	1	tet(M)	38.99
GCA_000463505.1	C238	S. anginosus	ICE	52964	1193598..1246561	CAAX amino terminal protease family protein	MOBP1	typeFATA	NA	0		36.98
GCA_000463505.1	C238	S. anginosus	ICE	171807	1268819..1440625	rlmD	MOBQ,MOBP1	typeFATA	TGCTTGTTGGGGAAATCCCCAAACCCCT	1	erm(A)	34.39
GCA_000463505.1	C238	S. anginosus	ICE	29583	1470394..1499976	NA	MOBP1	typeFATA	NA	0		36.27
GCA_000463505.1	C238	S. anginosus	ICE	40853	1950088..1990940	NA	MOBP1	typeFATA	NA	0		35.16
GCA_001697145.1	J4206	S. anginosus	ICE	41558	616416..657973	EzrA	profile_MOBT	typeFA	TGTTTTTTGTCGATTTGTACCCCCCTGTTAGATACGGGGGGTT	0		40.01
GCA_001697145.1	J4206	S. anginosus	ICE	106006	1181849..1287854	rlmD	MOBP1,MOBQ	typeFATA	NA	0		33.72
GCA_001412635.1	J4211	S. anginosus	ICE	45606	1190636..1236241	NA	MOBP1	typeFATA	NA	0		39.3
GCA_001412635.1	J4211	S. anginosus	ICE	17526	240252..257777	YajC	profile_MOBT	typeFA	GTATGTCAACTTTTAAAGCCCATTTGACATACGCTGAAATTTTGTAAATCCCTTGTAACCAAAGGATTTTCTAATGTTTTTTTGACTGTTTCCTGTCGATTTGTACCCCCCTGTTAGATACGGGGGGTTAAGT	1	tet(M)	38.99
GCA_016725185.1	FDAARGOS_1155	S. anginosus	ICE	63770	650895..714664	ATP-binding protein (I6J12_03160) ↔ Fic family protein (I6J12_03375)	MOBP1	typeFATA	AAGGGGTTTGGGGATTTCCCCAACAAGC	0		31.04
GCA_016725185.1	FDAARGOS_1155	S. anginosus	ICE	230180	1032721..1262900	rlmD	MOBP1	typeFATA	TGCTTGTTGGGGAAATCCCCAAACCCCT	0		35.18
GCA_016903355.1	FDAARGOS_1357	S. anginosus	ICE	17524	1081071..1098594	galM	profile_MOBT	typeFA	ACTTAACCCCCCGTATCTAACAGGGGGGTACAAATCGACAGGAAACAGTCAAAAAAACATTAGAAAATCCTTTGGTTACAAGGGATTTACAAAATTTCAGCGTATGTCAAATGGGCTTTAAAAGTTGACATAC	1	tet(M)	39.01
GCA_016903355.1	FDAARGOS_1357	S. anginosus	ICE	144994	226659..371652	rplL	MOBQ,MOBP1,MOBC,profile_MOBT	typeFATA	ACTTAACCCCCCGTATCTAACAGGGGGGTACAAATCGACAGGAAACAGTCAAAAAAACATTAGAAAATCCTTTGGTTACAAGGGATTTACAAAATTTCAGCGTATGTCAAATGGGCTTTAAAAGTTGACATAC	1	erm(B)	34.86
GCA_016903355.1	FDAARGOS_1357	S. anginosus	ICE	20805	671731..692535	NA	MOBP1	typeFATA	TTGGGGAAATCCCCAAGCCCCTTA	0		38.86
GCA_020735765.1	FDAARGOS_1569	S. anginosus	ICE	24621	1851146..1875766	rplL	MOBP1	typeFATA	NA	0		38.13
GCA_021184285.1		S. anginosus	ICE	28879	1365053..1393931	rplL	MOBP1	typeFATA	TTGGGGAAATCCCCAAGCCCCT	0		39.05
GCA_029011905.1	VSI68	S. anginosus	ICE	23999	817741..841739	NA	profile_MOBT	typeFA	TCTAACAGGGGGGTACAAATCGACAGGAAACAGTCAAAAAAACATTAGAAAATCCTTTGGTTACAAGGGATTTACAAAATTTCAGCGTATGTCAAATGGGCTTTAAAAGTTGACATAC	2	tet(M); tet(L)	37.35
GCA_029011905.1	VSI68	S. anginosus	ICE	143594	1201197..1344790	rlmD	MOBP1,MOBQ	typeFATA	NA	0		37.33
GCA_029010215.1	VSI67	S. anginosus	ICE	131949	1275823..1407771	SEC10/PgrA	MOBP1,MOBV	typeFATA	NA	0		38.68
GCA_029010275.1	VSI85	S. anginosus	ICE	78314	278361..356674	tRNA-Lys	MOBP1	typeFATA	NA	0		36.34
GCA_029010275.1	VSI85	S. anginosus	ICE	24259	440735..464993	tRNA-Thr	MOBP1	typeFATA	NA	0		38.73
GCA_029010275.1	VSI85	S. anginosus	ICE	50841	1426624..1477464	SEC10/PgrA	MOBP1	typeFATA	NA	0		37.4
GCA_029011235.1	VSI52	S. anginosus	ICE	93152	1257973..1351124	rplL	MOBV,profile_MOBT,MOBP1,MOBQ	typeFA	GTATGTCAACTTTTAAAGCCCATTTGACATACGCTGAAATTTTGTAAATCCCTTGTAACCAAAGGATTTTCTAATGTTTTTTTGACTGTTTCCTGTCGATTTGTACCCCCCTGTTAGATACGGGGGGTTAAGT	3	erm(T); tet(L); tet(M)	34.61
GCA_029011235.1	VSI52	S. anginosus	ICE	83380	278899..362278	tRNA-Lys	MOBT,MOBP1	typeFATA	NA	0		36.27
GCA_029011235.1	VSI52	S. anginosus	ICE	26599	446093..472691	tRNA-Thr	MOBP1	typeFATA	NA	0		38.61
GCA_029011235.1	VSI52	S. anginosus	ICE	32881	1403411..1436291	lysS	MOBP1	typeFATA	NA	0		36.84
GCA_029011235.1	VSI52	S. anginosus	ICE	22971	1825353..1848323	rplL	MOBP1	typeFATA	NA	0		38.67
GCA_029011295.1	VSI40	S. anginosus	ICE	50841	1266967..1317807	SEC10/PgrA	MOBP1	typeFATA	NA	0		37.38
GCA_029011355.1	VSI37	S. anginosus	ICE	96354	1358570..1454923	SEC10/PgrA	MOBP1	typeFATA	NA	0		38.41
GCA_029011615.1	VSI16	S. anginosus	ICE	129335	1253478..1382812	YlbF/YmcA	MOBP1,MOBV,profile_MOBT,MOBQ	typeFA	GTATGTCAACTTTTAAAGCCCATTTGACATACGCTGAAATTTTGTAAATCCCTTGTAACCAAAGGATTTTCTAATGTTTTTTTGACTGTTTCCTGTCGATTTGTACCCCCCTGTTAGATACGGGGGGTTAAGT	2	tet(L); tet(M)	34.99
GCA_029011615.1	VSI16	S. anginosus	ICE	129335	1253478..1382812	YlbF/YmcA	MOBP1,MOBV,profile_MOBT,MOBQ	typeFATA	GTATGTCAACTTTTAAAGCCCATTTGACATACGCTGAAATTTTGTAAATCCCTTGTAACCAAAGGATTTTCTAATGTTTTTTTGACTGTTTCCTGTCGATTTGTACCCCCCTGTTAGATACGGGGGGTTAAGT	0		34.99
GCA_008726525.2	UMB4708	S. anginosus	ICE	42095	519134..561228	rplK	MOBP1	typeFATA	NA	0		36.62
GCA_050613235.1	980/01	S. anginosus	ICE	20336	1094787..1115122	rplL	MOBP1	typeFATA	TTGGGGAAATCCCCAAGCCCCTT	0		38.23
GCA_036236295.2	UMB3052	S. anginosus	ICE	17523	1645940..1663462	rpmH	profile_MOBT	typeFA	ACTTAACCCCCCGTATCTAACAGGGGGGTACAAATCGACAGGAAACAGTCAAAAAAACATTAGAAAATCCTTTGGTTACAAGGGATTTACAAAATTTCAGCGTATGTCAAATGGGCTTTAAAAGTTGACATAC	0		38.99
GCA_036236295.2	UMB3052	S. anginosus	ICE	35352	9648..44999	lysS	MOBP1	typeFATA	NA	0		38.63
GCA_036236295.2	UMB3052	S. anginosus	ICE	53144	973035..1026178	tRNA-Lys	MOBP1,MOBT	typeFATA	TTCAACCCCCGATTTCTAATAGGGGGGTAATATTTG	0		36.97
GCA_036234475.2	UMB2693	S. anginosus	ICE	17524	814613..832136	galM	profile_MOBT	typeFA	ACTTAACCCCCCGTTTCTAACAGGGGGGTACAAATCGACAGGAAACAGTCAAAAAAACATTAGAAAATCCTTTGGTTACAAGGGATTTACAAAATTTCAGCGTATGTCAAATGGGCTTTAAAAGTTGACATAC	1	tet(M)	38.99
GCA_036234475.2	UMB2693	S. anginosus	ICE	38148	516349..554496	rplK	MOBP1	typeFATA	NA	0		38.07
GCA_018919275.2	UMB1353	S. anginosus	ICE	164407	1217213..1381619	rlmD	MOBP1,MOBQ	typeFATA	NA	0		35.1
GCA_900636475.1	NCTC10713	S. anginosus	ICE	49634	295782..345415	NA	MOBQ,MOBP1	typeFATA	NA	0		34.07
GCA_900636475.1	NCTC10713	S. anginosus	ICE	25996	71413..97408	ptsG	MOBP1	typeFATA	NA	0		38.13
GCA_009738555.1	HL_100	S. canis	ICE	96765	806457..903221	rplL	profile_MOBT,MOBP1	typeFA	ACTTAACCCCCCGTATCTAACAGGGGGGTACAAATCGACAGGAAACAGTCAAAAAAACATTAGAAAATCCTTTGGTTACAAGGGATTTACAAAATTTCAGCGTATGTCAAATGGGCTTTAAAAGTTGACATAC	1	tet(M)	38.72
GCA_009738555.1	HL_100	S. canis	ICE	154067	806457..960523	rplL	profile_MOBT,MOBP1	typeFATA	ACTTAACCCCCCGTATCTAACAGGGGGGTACAAATCGACAGGAAACAGTCAAAAAAACATTAGAAAATCCTTTGGTTACAAGGGATTTACAAAATTTCAGCGTATGTCAAATGGGCTTTAAAAGTTGACATAC	0		37.77
GCA_010993865.2	HL_98_2	S. canis	ICE	40074	1315475..1355548	rpmE	profile_MOBT	typeFA	ATTTCTACCCCCCTGTTAGAATGGGGGGGTTAA	1	tet(S)	36.12
GCA_010993865.2	HL_98_2	S. canis	ICE	86241	1058297..1144537	rplL	MOBP1	typeFATA	NA	0		38.26
GCA_010993865.2	HL_98_2	S. canis	ICE	25848	1945841..1971688	NA	MOBP1	typeFATA	NA	0		40.81
GCA_010993845.2	HL_77_2	S. canis	ICE	58022	589640..647661	NA	MOBQ,MOBP1	typeFATA	NA	0		33.85
GCA_010993845.2	HL_77_2	S. canis	ICE	53844	1071212..1125055	rplL	MOBP1	typeFATA	NA	0		38.79
GCA_010993845.2	HL_77_2	S. canis	ICE	45014	1338725..1383738	rplL	profile_MOBT	typeFA	GTATGTCAACTTTTAAAGCCCATTTGACATACGCTGAAATTTTGTAAATCCCTTGTAACCAAAGGATTTTCTAATGTTTTTTTGACTGTTTCCTGTCGATTTGTACCCCCCTGTTAGATACGGGGGGTTAAGT	1	tet(M)	38.97
GCA_010993915.2	HL_77_1	S. canis	ICE	63200	1178935..1242134	rplL	MOBP1,MOBV	typeFATA	NA	1	tet(O)	39.72
GCA_900636575.1	NCTC12191	S. canis	ICE	70646	1595558..1666203	rbgA	MOBP1	typeFATA	NA	0		38.21
GCA_901521425.1	B700072	S. canis	ICE	136563	806499..943061	marA	MOBP1	typeFATA	NA	0		37.66
GCA_023167545.1	CCUG 24889	S. constellatus	ICE	114806	1113925..1228730	rplL	MOBP1,profile_MOBT	typeFA	GTATGTCAACTTTTAAAGCCCATTTGACATACGCTGAAATTTTGTAAATCCCTTGTAACCAAAGGATTTTCTAATGTTTTTTTGACTGTTTCCTGTCGATTTGTACCCCCCTGTTAGATACGGGGGGTTAAGT	1	tet(M)	35.18
GCA_023167545.1	CCUG 24889	S. constellatus	ICE	115288	1113925..1229212	rplL	MOBP1,profile_MOBT	typeFATA	GTATGTCAACTTTTAAAGCCCATTTGACATACGCTGAAATTTTGTAAATCCCTTGTAACCAAAGGATTTTCTAATGTTTTTTTGACTGTTTCCTGTCGATTTGTACCCCCCTGTTAGATACGGGGGGTTAAGT	0		35.19
GCA_000463395.1	C232	S. constellatus	ICE	22341	149189..171529	rpmH	MOBP1	typeFATA	TAAGGGGCTTGGGGATTTCCCCAA	0		38.41
GCA_000463395.1	C232	S. constellatus	ICE	71144	1229794..1300937	rlmD	MOBP1,MOBQ	typeFATA	NA	1	tet(32)	36.43
GCA_000463445.1	C818	S. constellatus	ICE	22341	149189..171529	rpmH	MOBP1	typeFATA	TAAGGGGCTTGGGGATTTCCCCAA	0		38.41
GCA_000463445.1	C818	S. constellatus	ICE	71144	1230023..1301166	rlmD	MOBP1,MOBQ	typeFATA	NA	1	tet(32)	36.43
GCA_000463425.1	C1050	S. constellatus	ICE	51521	816061..867581	mutM	MOBP1	typeFATA	NA	0		38.58
GCA_000463425.1	C1050	S. constellatus	ICE	59525	1297393..1356917	rlmD	MOBP1,MOBQ	typeFATA	NA	0		34.11
GCA_000463425.1	C1050	S. constellatus	ICE	17524	64407..81930	galM	profile_MOBT	typeFA	GTATGTCAACTTTTAAAGCCCATTTGACATACGCTGAAATTTTGTAAATCCCTTGTAACCAAAGGATTTTCTAATGTTTTTTTGACTGTTTCCTGTCGATTTGTACCCCCCTGTTAGATACGGGGGGTTAAGT	1	tet(M)	38.99
GCA_000463425.1	C1050	S. constellatus	ICE	22341	167234..189574	rpmH	MOBP1	typeFATA	TAAGGGGCTTGGGGATTTCCCCAA	0		38.4
GCA_016725005.1	FDAARGOS_1156	S. constellatus	ICE	114806	655348..770153	rplL	MOBP1,profile_MOBT	typeFA	GTATGTCAACTTTTAAAGCCCATTTGACATACGCTGAAATTTTGTAAATCCCTTGTAACCAAAGGATTTTCTAATGTTTTTTTGACTGTTTCCTGTCGATTTGTACCCCCCTGTTAGATACGGGGGGTTAAGT	1	tet(M)	35.18
GCA_016725005.1	FDAARGOS_1156	S. constellatus	ICE	115288	655348..770635	rplL	MOBP1,profile_MOBT	typeFATA	GTATGTCAACTTTTAAAGCCCATTTGACATACGCTGAAATTTTGTAAATCCCTTGTAACCAAAGGATTTTCTAATGTTTTTTTGACTGTTTCCTGTCGATTTGTACCCCCCTGTTAGATACGGGGGGTTAAGT	0		35.19
GCA_016889885.1	FDAARGOS_1208	S. constellatus	ICE	22341	1648932..1671272	rplL	MOBP1	typeFATA	TAAGGGGCTTGGGGATTTCCCCAA	0		38.4
GCA_016889885.1	FDAARGOS_1208	S. constellatus	ICE	60797	819793..880589	rlmD	MOBP1,MOBQ	typeFATA	NA	0		34.16
GCA_016889885.1	FDAARGOS_1208	S. constellatus	ICE	47267	1466635..1513901	tRNA-Ala	MOBP1	typeFATA	NA	0		34.43
GCA_019336935.2	11-6117	S. constellatus	ICE	28293	339486..367778	TatD	MOBP1	typeFATA	NA	0		36.47
GCA_000385925.1	AS 1.3089	S. cristatus	ICE	20371	1589912..1610282	NA	profile_MOBT	typeFA	ACTTAACCCCCGTATCTAACAGGGGGGTACAAATCGACAGGAAACAGTCAAAAAACATTAGAAAATCCTTTGGTTACAAGGGATTTACAAAATTTCAGCGTATGTCAAATGGGCTTTAAAAGTTGACATAC	2	erm(B); tet(M)	38.47
GCA_000385925.1	AS 1.3089	S. cristatus	ICE	20364	805720..826083	rplL	MOBP1	typeFATA	NA	0		40.11
GCA_900475445.1	NCTC12479	S. cristatus	ICE	50731	1105118..1155848	rplL	MOBP1,profile_MOBT	typeFA	ACTTAACCCCCCGTATCTAACAGGGGGGTACAAATCGACAGGAAACAGTCAAAAAAACATTAGAAAATCCTTTGGTTACAAGGGATTTACAAAATTTCAGCGTATGTCAAATGGGCTTTAAAAGTTGACATAC	1	tet(M)	36.64
GCA_900475445.1	NCTC12479	S. cristatus	ICE	53500	1105118..1158617	rplL	MOBP1,profile_MOBT	typeFATA	ACTTAACCCCCCGTATCTAACAGGGGGGTACAAATCGACAGGAAACAGTCAAAAAAACATTAGAAAATCCTTTGGTTACAAGGGATTTACAAAATTTCAGCGTATGTCAAATGGGCTTTAAAAGTTGACATAC	0		36.53
GCA_900478185.1	NCTC13807	S. cristatus	ICE	20375	1623975..1644349	rpmH	profile_MOBT	typeFA	ACTTAACCCCCCGTATCTAACAGGGGGGTACAAATCGACAGGAAACAGTCAAAAAAACATTAGAAAATCCTTTGGTTACAAGGGATTTACAAAATTTCAGCGTATGTCAAATGGGCTTTAAAAGTTGACATAC	2	erm(B); tet(M)	38.46
GCA_900478185.1	NCTC13807	S. cristatus	ICE	20363	960673..981035	rplL	MOBP1	typeFATA	NA	0		40.11
GCA_000307185.1	RE378	S. dysgalactiae	ICE	60776	1285668..1346443	rlmD	MOBP1,MOBQ	typeFATA	NA	0		34.49
GCA_000307185.1	RE378	S. dysgalactiae	ICE	31288	1598787..1630074	tRNA-Val	MOBP1	typeFATA	NA	0		39.23
GCA_003967135.1	Kdys0611	S. dysgalactiae	ICE	41433	1047170..1088602	NA	profile_MOBT	typeFA	GTATGTCAACTTTTAAAGCCCATTTTACATACGCTGAAATTTTGTAAATCCCTTGTAACCAAAGGATTTTCTAATGTTTTTTTGACTGTTTCCTGTCGATTTGTACCCCCCTGTTAGATACGGGGGGTTAA	0		38.12
GCA_014192695.1	89	S. dysgalactiae	ICE	61554	879230..940783	rplL	MOBP1	typeFATA	NA	0		37.96
GCA_014192695.1	89	S. dysgalactiae	ICE	72234	1339878..1412111	rlmD	MOBP1,MOBQ	typeFATA	NA	0		33.09
GCA_000188315.1		S. dysgalactiae	ICE	144280	1465581..1609860	tRNA-Glu	MOBP1	typeFATA	NA	0		39.1
GCA_000188315.1		S. dysgalactiae	ICE	78999	987001..1065999	rplL	MOBP1	typeFATA	NA	0		37.97
GCA_000188715.1	ATCC 12394	S. dysgalactiae	ICE	45473	1354158..1399630	rplL	MOBP1	typeFATA	NA	0		35.14
GCA_009650235.1		S. dysgalactiae	ICE	85700	41800..127499	rplL	MOBP1,MOBV	typeFATA	NA	0		38.44
GCA_009650255.1		S. dysgalactiae	ICE	68558	476690..545247	NA	profile_MOBT,MOBP1	typeFA	ACTTAACCCCCGTATCTAACAGGGGGGTACAAATTGACAGGAAACAGTCAAAAAAACATTAGAAAATCCTTTGGTTACAAGGGATTTACAAAATTTCAGCGTATGTCAAATGGGCTTTAAAAGTTGACATAC	1	tet(M)	32.48
GCA_009650255.1		S. dysgalactiae	ICE	69767	475481..545247	NA	profile_MOBT,MOBP1	typeFATA	ACTTAACCCCCGTATCTAACAGGGGGGTACAAATTGACAGGAAACAGTCAAAAAAACATTAGAAAATCCTTTGGTTACAAGGGATTTACAAAATTTCAGCGTATGTCAAATGGGCTTTAAAAGTTGACATAC	0		32.47
GCA_009650255.1		S. dysgalactiae	ICE	72554	1114676..1187229	NA	MOBV,MOBP1	typeFATA	NA	1	tet(O)	39.21
GCA_009650255.1		S. dysgalactiae	ICE	74871	1607954..1682824	NA	MOBQ,MOBP1	typeFATA	NA	0		35
GCA_008693725.1	FDAARGOS_654	S. dysgalactiae	ICE	68221	707723..775943	rplL	MOBP1	typeFATA	NA	1	erm(A)	32.65
GCA_008693725.1	FDAARGOS_654	S. dysgalactiae	ICE	58166	1841614..1899779	NA	MOBQ,MOBP1	typeFATA	NA	0		34.2
GCA_012844385.1	TPCH-A19	S. dysgalactiae	ICE	49254	1275205..1324458	rplL	MOBP1	typeFATA	NA	0		35.64
GCA_016128095.1	FDAARGOS_1017	S. dysgalactiae	ICE	38788	498993..537780	rplL	MOBP1	typeFATA	NA	0		39.48
GCA_016724885.1	FDAARGOS_1157	S. dysgalactiae	ICE	26755	326434..353188	rplL	MOBP1	typeFATA	NA	0		38.99
GCA_016724885.1	FDAARGOS_1157	S. dysgalactiae	ICE	57783	642539..700321	NA	MOBP1	typeFATA	NA	0		38.15
GCA_016766775.1		S. dysgalactiae	ICE	58304	1966493..2024796	NA	MOBQ	typeFATA	NA	0		34.21
GCA_019856435.1	DY107	S. dysgalactiae	ICE	67382	1388958..1456339	NA	MOBV	typeFATA	CATGTAAAGTATAACCCACTAGACTT	8	cat; aph(3')-III; aac(6')-aph(2''); lnu(B); lsa(E); ant(6)-Ia; erm(B); tet(O)	38.54
GCA_026692645.1	WJ001	S. dysgalactiae	ICE	89516	1244206..1333721	rplL	MOBP1	typeFATA	NA	0		38.86
GCA_029234045.1	MGCS36089	S. dysgalactiae	ICE	48033	873218..921250	rplL	MOBP1	typeFATA	CACATTTACGAAGTAAAGTATAATGGGTTATACTTTACATG	0		38.32
GCA_029234045.1	MGCS36089	S. dysgalactiae	ICE	48573	1333250..1381822	rlmD	MOBP1,MOBQ	typeFATA	NA	0		34.19
GCA_029234065.1	MGCS36083	S. dysgalactiae	ICE	48573	1394268..1442840	rlmD	MOBP1,MOBQ	typeFATA	NA	0		34.19
GCA_029234065.1	MGCS36083	S. dysgalactiae	ICE	30838	880774..911611	NA		typeFATA	NA	0		41.56
GCA_029234095.1	MGGS36055	S. dysgalactiae	ICE	68429	1325440..1393868	NA	MOBQ	typeFATA	NA	1	erm(A)	33.55
GCA_029234095.1	MGGS36055	S. dysgalactiae	ICE	29996	1652500..1682495	tRNA-Ala	MOBP1	typeFATA	NA	0		39.35
GCA_029234115.1	MGCS36044	S. dysgalactiae	ICE	48261	880802..929062	rplL	MOBP1	typeFATA	CACATTTACGAAGTAAAGTATAATGGGTTATACTTTACATG	0		38.35
GCA_029234115.1	MGCS36044	S. dysgalactiae	ICE	48573	1340377..1388949	rlmD	MOBP1,MOBQ	typeFATA	NA	0		34.19
GCA_029234135.1	MGCS35957	S. dysgalactiae	ICE	48261	914535..962795	rplL	MOBP1	typeFATA	CACATTTACGAAGTAAAGTATAATGGGTTATACTTTACATG	0		38.35
GCA_029234135.1	MGCS35957	S. dysgalactiae	ICE	49146	1373019..1422164	rlmD	MOBP1,MOBQ	typeFATA	NA	0		34.62
GCA_029234155.1	MGCS35823	S. dysgalactiae	ICE	48261	911477..959737	rplL	MOBP1	typeFATA	CACATTTACGAAGTAAAGTATAATGGGTTATACTTTACATG	0		38.35
GCA_029234155.1	MGCS35823	S. dysgalactiae	ICE	48573	1371589..1420161	rlmD	MOBP1,MOBQ	typeFATA	NA	0		34.19
GCA_029234175.1	MGCS35922	S. dysgalactiae	ICE	48261	880564..928824	rplL	MOBP1	typeFATA	CACATTTACGAAGTAAAGTATAATGGGTTATACTTTACATG	0		38.35
GCA_029234175.1	MGCS35922	S. dysgalactiae	ICE	25827	1747993..1773819	rimP	MOBP1	typeFATA	NA	0		38.64
GCA_029234175.1	MGCS35922	S. dysgalactiae	ICE	44204	2562..46765	NA	MOBP1	typeFATA	NA	0		36.6
GCA_030034715.1	UT_10236	S. dysgalactiae	ICE	48261	879476..927736	rplL	MOBP1	typeFATA	CACATTTACGAAGTAAAGTATAATGGGTTATACTTTACATG	0		38.35
GCA_030034695.1	UT_120444	S. dysgalactiae	ICE	50479	514512..564990	tRNA-Tyr	MOBP1	typeFATA	NA	0		36.87
GCA_036815195.1	NS3396	S. dysgalactiae	ICE	62332	905380..967711	rplL	MOBP1	typeFATA	NA	0		37.99
GCA_045345565.1	STG643	S. dysgalactiae	ICE	51099	1335544..1386642	rplL	MOBP1	typeFATA	NA	0		37.33
GCA_042821045.1	MGGS36030	S. dysgalactiae	ICE	37613	1245417..1283029	rplL	MOBP1	typeFATA	NA	0		37.89
GCA_042821045.1	MGGS36030	S. dysgalactiae	ICE	58292	1366201..1424492	NA	MOBQ	typeFATA	NA	0		34.21
GCA_042821135.1	MGGS36021	S. dysgalactiae	ICE	29230	1134453..1163682	tRNA-Gln	MOBP1	typeFATA	NA	0		39.66
GCA_042821135.1	MGGS36021	S. dysgalactiae	ICE	73979	1339376..1413354	NA	MOBQ	typeFATA	NA	1	erm(A)	33.88
GCA_042822305.1	MGGS35977	S. dysgalactiae	ICE	58303	847083..905385	NA	MOBQ	typeFATA	NA	0		34.22
GCA_042822305.1	MGGS35977	S. dysgalactiae	ICE	60341	1533142..1593482	rplL	MOBP1	typeFATA	TGTTGGGGAAATCCCCAAGCCCCT	0		39.8
GCA_042822795.1	MGCS36101	S. dysgalactiae	ICE	44880	1339277..1384156	rlmD	MOBP1,MOBQ	typeFATA	NA	0		34.41
GCA_042822795.1	MGCS36101	S. dysgalactiae	ICE	48255	880825..929079	rplL	MOBP1	typeFATA	CACATTTACGAAGTAAAGTATAATGGGTTATACTTTACATG	0		38.34
GCA_042823405.1	MGCS36090	S. dysgalactiae	ICE	48261	879528..927788	rplL	MOBP1	typeFATA	CACATTTACGAAGTAAAGTATAATGGGTTATACTTTACATG	0		38.34
GCA_042823405.1	MGCS36090	S. dysgalactiae	ICE	49141	1339786..1388926	rlmD	MOBP1,MOBQ	typeFATA	NA	0		34.62
GCA_042823405.1	MGCS36090	S. dysgalactiae	ICE	36021	1967882..2003902	NA	MOBP1	typeFATA	NA	0		38.66
GCA_042823915.1	MGCS36086	S. dysgalactiae	ICE	48261	879604..927864	rplL	MOBP1	typeFATA	CACATTTACGAAGTAAAGTATAATGGGTTATACTTTACATG	0		38.35
GCA_042823915.1	MGCS36086	S. dysgalactiae	ICE	102163	1339960..1442122	rlmD	MOBP1,MOBQ	typeFATA	NA	0		35.19
GCA_042824005.1	MGCS36085	S. dysgalactiae	ICE	48573	1342385..1390957	rlmD	MOBP1,MOBQ	typeFATA	NA	0		34.19
GCA_042824005.1	MGCS36085	S. dysgalactiae	ICE	48261	882124..930384	rplL	MOBP1	typeFATA	CACATTTACGAAGTAAAGTATAATGGGTTATACTTTACATG	0		38.35
GCA_042824935.1	MGCS36071	S. dysgalactiae	ICE	48260	879498..927757	rplL	MOBP1	typeFATA	CACATTTACGAAGTAAAGTATAATGGGTTATACTTTACATG	0		38.35
GCA_042824935.1	MGCS36071	S. dysgalactiae	ICE	48573	1337773..1386345	rlmD	MOBP1,MOBQ	typeFATA	NA	0		34.19
GCA_042825465.1	MGCS36067	S. dysgalactiae	ICE	48573	1337808..1386380	rlmD	MOBP1,MOBQ	typeFATA	NA	0		34.19
GCA_042826005.1	MGCS36066	S. dysgalactiae	ICE	48261	879570..927830	rplL	MOBP1	typeFATA	NA	0		NA
GCA_042826005.1	MGCS36066	S. dysgalactiae	ICE	102161	1339925..1442085	rlmD	MOBP1,MOBQ	typeFATA	NA	0		NA
GCA_042828865.1	MGCS36049	S. dysgalactiae	ICE	48573	1337821..1386393	rlmD	MOBP1,MOBQ	typeFATA	NA	0		34.19
GCA_042828865.1	MGCS36049	S. dysgalactiae	ICE	48261	879538..927798	rplL	MOBP1	typeFATA	CACATTTACGAAGTAAAGTATAATGGGTTATACTTTACATG	0		38.35
GCA_042830455.1	MGCS36042	S. dysgalactiae	ICE	49899	1339870..1389768	rlmD	MOBP1,MOBQ	typeFATA	NA	0		34.29
GCA_042830455.1	MGCS36042	S. dysgalactiae	ICE	48261	879604..927864	rplL	MOBP1	typeFATA	CACATTTACGAAGTAAAGTATAATGGGTTATACTTTACATG	0		38.35
GCA_042830985.1	MGCS36038	S. dysgalactiae	ICE	48573	1341253..1389825	rlmD	MOBP1,MOBQ	typeFATA	NA	0		34.19
GCA_042830985.1	MGCS36038	S. dysgalactiae	ICE	48261	880926..929186	rplL	MOBP1	typeFATA	CACATTTACGAAGTAAAGTATAATGGGTTATACTTTACATG	0		38.35
GCA_042835875.1	MGCS36018	S. dysgalactiae	ICE	48573	1339867..1388439	rlmD	MOBP1,MOBQ	typeFATA	NA	0		34.18
GCA_042835875.1	MGCS36018	S. dysgalactiae	ICE	48261	879475..927735	rplL	MOBP1	typeFATA	CACATTTACGAAGTAAAGTATAATGGGTTATACTTTACATG	0		38.35
GCA_042836465.1	MGCS36016	S. dysgalactiae	ICE	48261	879602..927862	rplL	MOBP1	typeFATA	CACATTTACGAAGTAAAGTATAATGGGTTATACTTTACATG	0		38.35
GCA_042836465.1	MGCS36016	S. dysgalactiae	ICE	49197	1339531..1388727	rlmD	MOBP1,MOBQ	typeFATA	NA	0		34.56
GCA_042836995.1	MGCS36014	S. dysgalactiae	ICE	48573	1338057..1386629	rlmD	MOBP1,MOBQ	typeFATA	NA	0		34.2
GCA_042836995.1	MGCS36014	S. dysgalactiae	ICE	48261	877731..925991	rplL	MOBP1	typeFATA	CACATTTACGAAGTAAAGTATAATGGGTTATACTTTACATG	0		38.34
GCA_042837585.1	MGCS36011	S. dysgalactiae	ICE	48261	936000..984260	rplL	MOBP1	typeFATA	CACATTTACGAAGTAAAGTATAATGGGTTATACTTTACATG	0		38.34
GCA_042837585.1	MGCS36011	S. dysgalactiae	ICE	51003	1394188..1445190	rlmD	MOBP1,MOBQ	typeFATA	NA	0		34.17
GCA_042839455.1	MGCS36000	S. dysgalactiae	ICE	48573	1331383..1379955	rlmD	MOBP1,MOBQ	typeFATA	NA	0		34.19
GCA_042839455.1	MGCS36000	S. dysgalactiae	ICE	48261	872989..921249	rplL	MOBP1	typeFATA	CACATTTACGAAGTAAAGTATAATGGGTTATACTTTACATG	0		38.35
GCA_042839885.1	MGCS35999	S. dysgalactiae	ICE	48261	879472..927732	rplL	MOBP1	typeFATA	CACATTTACGAAGTAAAGTATAATGGGTTATACTTTACATG	0		38.34
GCA_042839885.1	MGCS35999	S. dysgalactiae	ICE	48572	1340876..1389447	rlmD	MOBP1,MOBQ	typeFATA	NA	0		34.19
GCA_042840455.1	MGCS35997	S. dysgalactiae	ICE	48573	1342030..1390602	rlmD	MOBP1,MOBQ	typeFATA	NA	0		34.19
GCA_042840455.1	MGCS35997	S. dysgalactiae	ICE	48261	880799..929059	rplL	MOBP1	typeFATA	CACATTTACGAAGTAAAGTATAATGGGTTATACTTTACATG	0		38.35
GCA_042840885.1	MGCS35988	S. dysgalactiae	ICE	48262	879477..927738	rplL	MOBP1	typeFATA	CACATTTACGAAGTAAAGTATAATGGGTTATACTTTACATG	0		38.35
GCA_042840885.1	MGCS35988	S. dysgalactiae	ICE	48573	1323962..1372534	rlmD	MOBP1,MOBQ	typeFATA	NA	0		34.19
GCA_042841075.1	MGCS35987	S. dysgalactiae	ICE	48261	879600..927860	rplL	MOBP1	typeFATA	CACATTTACGAAGTAAAGTATAATGGGTTATACTTTACATG	0		38.35
GCA_042841845.1	MGCS35984	S. dysgalactiae	ICE	48261	880802..929062	rplL	MOBP1	typeFATA	CACATTTACGAAGTAAAGTATAATGGGTTATACTTTACATG	0		38.35
GCA_042842215.1	MGCS35983	S. dysgalactiae	ICE	48573	1337767..1386339	rlmD	MOBP1,MOBQ	typeFATA	NA	0		34.19
GCA_042842215.1	MGCS35983	S. dysgalactiae	ICE	48261	879460..927720	rplL	MOBP1	typeFATA	CACATTTACGAAGTAAAGTATAATGGGTTATACTTTACATG	0		38.35
GCA_042842865.1	MGCS35980	S. dysgalactiae	ICE	48573	1331846..1380418	rlmD	MOBP1,MOBQ	typeFATA	NA	0		34.19
GCA_042842865.1	MGCS35980	S. dysgalactiae	ICE	48260	873659..921918	rplL	MOBP1	typeFATA	CACATTTACGAAGTAAAGTATAATGGGTTATACTTTACATG	0		38.34
GCA_042843455.1	MGCS35978	S. dysgalactiae	ICE	48261	879526..927786	rplL	MOBP1	typeFATA	CACATTTACGAAGTAAAGTATAATGGGTTATACTTTACATG	0		38.35
GCA_042843455.1	MGCS35978	S. dysgalactiae	ICE	48573	1341048..1389620	rlmD	MOBP1,MOBQ	typeFATA	NA	0		34.19
GCA_042844005.1	MGCS35973	S. dysgalactiae	ICE	48261	879498..927758	rplL	MOBP1	typeFATA	NA	0		NA
GCA_042844005.1	MGCS35973	S. dysgalactiae	ICE	48573	1339311..1387883	rlmD	MOBP1,MOBQ	typeFATA	NA	0		NA
GCA_042844555.1	MGCS35972	S. dysgalactiae	ICE	48261	879498..927758	rplL	MOBP1	typeFATA	CACATTTACGAAGTAAAGTATAATGGGTTATACTTTACATG	0		38.34
GCA_042844555.1	MGCS35972	S. dysgalactiae	ICE	94829	1337838..1432666	rlmD	MOBP1,MOBQ	typeFATA	NA	0		35.21
GCA_042845655.1	MGCS35965	S. dysgalactiae	ICE	48261	879945..928205	rplL	MOBP1	typeFATA	CACATTTACGAAGTAAAGTATAATGGGTTATACTTTACATG	0		38.34
GCA_042845655.1	MGCS35965	S. dysgalactiae	ICE	48573	1338100..1386672	rlmD	MOBP1,MOBQ	typeFATA	NA	0		34.19
GCA_042847285.1	MGCS35960	S. dysgalactiae	ICE	48261	879455..927715	rplL	MOBP1	typeFATA	CACATTTACGAAGTAAAGTATAATGGGTTATACTTTACATG	0		38.35
GCA_042847285.1	MGCS35960	S. dysgalactiae	ICE	48573	1323938..1372510	rlmD	MOBP1,MOBQ	typeFATA	NA	0		34.19
GCA_042848965.1	MGCS35953	S. dysgalactiae	ICE	48573	1333654..1382226	rlmD	MOBP1,MOBQ	typeFATA	NA	0		34.2
GCA_042848965.1	MGCS35953	S. dysgalactiae	ICE	48261	875090..923350	rplL	MOBP1	typeFATA	CACATTTACGAAGTAAAGTATAATGGGTTATACTTTACATG	0		38.35
GCA_042850475.1	MGCS35952	S. dysgalactiae	ICE	48261	879573..927833	rplL	MOBP1	typeFATA	CACATTTACGAAGTAAAGTATAATGGGTTATACTTTACATG	0		38.35
GCA_042850475.1	MGCS35952	S. dysgalactiae	ICE	57930	1339834..1397763	NA	MOBP1,MOBV,MOBQ	typeFATA	NA	0		35.08
GCA_042852015.1	MGCS35941	S. dysgalactiae	ICE	48573	1337507..1386079	rlmD	MOBP1,MOBQ	typeFATA	NA	0		34.19
GCA_042852015.1	MGCS35941	S. dysgalactiae	ICE	48261	879433..927693	rplL	MOBP1	typeFATA	CACATTTACGAAGTAAAGTATAATGGGTTATACTTTACATG	0		38.34
GCA_042853255.1	MGCS35940	S. dysgalactiae	ICE	48573	1393143..1441715	rlmD	MOBP1,MOBQ	typeFATA	NA	0		NA
GCA_042853255.1	MGCS35940	S. dysgalactiae	ICE	48261	932885..981145	rplL	MOBP1	typeFATA	CACATTTACGAAGTAAAGTATAATGGGTTATACTTTACATG	0		38.34
GCA_042854585.1	MGCS35939	S. dysgalactiae	ICE	48573	1339028..1387600	rlmD	MOBP1,MOBQ	typeFATA	NA	0		34.19
GCA_042854585.1	MGCS35939	S. dysgalactiae	ICE	49481	879452..928932	rplL	MOBP1	typeFATA	CACATTTACGAAGTAAAGTATAATGGGTTATACTTTACATG	0		38.45
GCA_042855555.1	MGCS35926	S. dysgalactiae	ICE	70172	879599..949770	rplL	MOBP1	typeFATA	CACATTTACGAAGTAAAGTATAATGGGTTATACTTTACATG	0		38.83
GCA_042855555.1	MGCS35926	S. dysgalactiae	ICE	49197	1341015..1390211	rlmD	MOBP1,MOBQ	typeFATA	NA	0		34.54
GCA_042858075.1	MGCS35904	S. dysgalactiae	ICE	48261	879474..927734	rplL	MOBP1	typeFATA	CACATTTACGAAGTAAAGTATAATGGGTTATACTTTACATG	0		38.34
GCA_042858075.1	MGCS35904	S. dysgalactiae	ICE	81135	1324030..1405164	NA	MOBP1	typeFATA	NA	0		35
GCA_042858705.1	MGCS35901	S. dysgalactiae	ICE	48573	1337811..1386383	rlmD	MOBP1,MOBQ	typeFATA	NA	0		34.19
GCA_042858705.1	MGCS35901	S. dysgalactiae	ICE	48261	879454..927714	rplL	MOBP1	typeFATA	CACATTTACGAAGTAAAGTATAATGGGTTATACTTTACATG	0		38.34
GCA_042859375.1	MGCS35898	S. dysgalactiae	ICE	48261	879692..927952	rplL	MOBP1	typeFATA	CACATTTACGAAGTAAAGTATAATGGGTTATACTTTACATG	0		38.35
GCA_042859375.1	MGCS35898	S. dysgalactiae	ICE	48678	1339954..1388631	rlmD	MOBP1,MOBQ	typeFATA	NA	0		NA
GCA_042860615.1	MGCS35893	S. dysgalactiae	ICE	62598	1341164..1403761	rlmD	MOBP1,MOBQ	typeFATA	NA	0		33.86
GCA_042860615.1	MGCS35893	S. dysgalactiae	ICE	48261	880838..929098	rplL	MOBP1	typeFATA	CACATTTACGAAGTAAAGTATAATGGGTTATACTTTACATG	0		38.35
GCA_042861675.1	MGCS35892	S. dysgalactiae	ICE	48261	879600..927860	rplL	MOBP1	typeFATA	CACATTTACGAAGTAAAGTATAATGGGTTATACTTTACATG	0		38.35
GCA_042861675.1	MGCS35892	S. dysgalactiae	ICE	48585	1339859..1388443	rlmD	MOBP1,MOBQ	typeFATA	NA	0		34.19
GCA_042863435.1	MGCS35887	S. dysgalactiae	ICE	48499	1337807..1386305	rlmD	MOBP1,MOBQ	typeFATA	NA	0		34.18
GCA_042863435.1	MGCS35887	S. dysgalactiae	ICE	48261	879475..927735	rplL	MOBP1	typeFATA	CACATTTACGAAGTAAAGTATAATGGGTTATACTTTACATG	0		38.35
GCA_042866015.1	MGCS35876	S. dysgalactiae	ICE	53348	884536..937883	rplL	MOBT,MOBP1	typeFATA	CACATTTACGAAGTAAAGTATAATGGGTTATACTTTACATG	0		38.36
GCA_042866015.1	MGCS35876	S. dysgalactiae	ICE	98354	1347978..1446331	rlmD	MOBP1,MOBQ	typeFATA	NA	0		35.35
GCA_042868505.1	MGCS35873	S. dysgalactiae	ICE	48261	879485..927745	rplL	MOBP1	typeFATA	CACATTTACGAAGTAAAGTATAATGGGTTATACTTTACATG	0		38.35
GCA_042868505.1	MGCS35873	S. dysgalactiae	ICE	48566	1337867..1386432	rlmD	MOBP1,MOBQ	typeFATA	NA	0		34.19
GCA_042871315.1	MGCS35871	S. dysgalactiae	ICE	48261	879476..927736	rplL	MOBP1	typeFATA	CACATTTACGAAGTAAAGTATAATGGGTTATACTTTACATG	0		38.35
GCA_042871315.1	MGCS35871	S. dysgalactiae	ICE	48573	1339670..1388242	rlmD	MOBP1,MOBQ	typeFATA	NA	0		34.19
GCA_042873075.1	MGCS35869	S. dysgalactiae	ICE	48573	1339041..1387613	rlmD	MOBP1,MOBQ	typeFATA	NA	0		34.19
GCA_042873075.1	MGCS35869	S. dysgalactiae	ICE	48261	880794..929054	rplL	MOBP1	typeFATA	CACATTTACGAAGTAAAGTATAATGGGTTATACTTTACATG	0		38.35
GCA_042876235.1	MGCS35868	S. dysgalactiae	ICE	48573	1338006..1386578	rlmD	MOBP1,MOBQ	typeFATA	NA	0		34.19
GCA_042876235.1	MGCS35868	S. dysgalactiae	ICE	48261	879572..927832	rplL	MOBP1	typeFATA	CACATTTACGAAGTAAAGTATAATGGGTTATACTTTACATG	0		38.35
GCA_042878675.1	MGCS35867	S. dysgalactiae	ICE	48261	880796..929056	rplL	MOBP1	typeFATA	CACATTTACGAAGTAAAGTATAATGGGTTATACTTTACATG	0		38.35
GCA_042881415.1	MGCS35861	S. dysgalactiae	ICE	48573	1341111..1389683	rlmD	MOBP1,MOBQ	typeFATA	NA	0		34.19
GCA_042881415.1	MGCS35861	S. dysgalactiae	ICE	48261	880786..929046	rplL	MOBP1	typeFATA	CACATTTACGAAGTAAAGTATAATGGGTTATACTTTACATG	0		38.35
GCA_042884265.1	MGCS35858	S. dysgalactiae	ICE	48261	879603..927863	rplL	MOBP1	typeFATA	CACATTTACGAAGTAAAGTATAATGGGTTATACTTTACATG	0		38.35
GCA_042884265.1	MGCS35858	S. dysgalactiae	ICE	34008	1340060..1374067	NA	MOBP1	typeFATA	NA	0		35.4
GCA_042884265.1	MGCS35858	S. dysgalactiae	ICE	35988	1951874..1987861	NA	MOBP1	typeFATA	NA	0		38.64
GCA_042887365.1	MGCS35856	S. dysgalactiae	ICE	48573	1338215..1386787	rlmD	MOBP1,MOBQ	typeFATA	NA	0		34.18
GCA_042887365.1	MGCS35856	S. dysgalactiae	ICE	48263	879601..927863	rplL	MOBP1	typeFATA	CACATTTACGAAGTAAAGTATAATGGGTTATACTTTACATG	0		38.35
GCA_042890665.1	MGCS35855	S. dysgalactiae	ICE	48260	880804..929063	rplL	MOBP1	typeFATA	CACATTTACGAAGTAAAGTATAATGGGTTATACTTTACATG	0		38.35
GCA_042890665.1	MGCS35855	S. dysgalactiae	ICE	49197	1324373..1373569	rlmD	MOBP1,MOBQ	typeFATA	NA	0		34.54
GCA_042895565.1	MGCS35853	S. dysgalactiae	ICE	48261	914138..962398	rplL	MOBP1	typeFATA	CACATTTACGAAGTAAAGTATAATGGGTTATACTTTACATG	0		38.35
GCA_042895565.1	MGCS35853	S. dysgalactiae	ICE	48573	1372717..1421289	rlmD	MOBP1,MOBQ	typeFATA	NA	0		34.19
GCA_042899835.1	MGCS35850	S. dysgalactiae	ICE	48261	879600..927860	rplL	MOBP1	typeFATA	CACATTTACGAAGTAAAGTATAATGGGTTATACTTTACATG	0		38.35
GCA_042899835.1	MGCS35850	S. dysgalactiae	ICE	48573	1338212..1386784	rlmD	MOBP1,MOBQ	typeFATA	NA	0		34.19
GCA_042902765.1	MGCS35844	S. dysgalactiae	ICE	48573	1339118..1387690	rlmD	MOBP1,MOBQ	typeFATA	NA	0		34.19
GCA_042902765.1	MGCS35844	S. dysgalactiae	ICE	48261	880801..929061	rplL	MOBP1	typeFATA	CACATTTACGAAGTAAAGTATAATGGGTTATACTTTACATG	0		38.34
GCA_042903515.1	MGCS35838	S. dysgalactiae	ICE	48261	1171968..1220228	rplL	MOBP1	typeFATA	CATGTAAAGTATAACCCATTATACTTTACTTCGTAAATGTG	0		38.34
GCA_042903515.1	MGCS35838	S. dysgalactiae	ICE	48573	1339547..1388119	rlmD	MOBP1,MOBQ	typeFATA	NA	0		34.19
GCA_042904165.1	MGCS35828	S. dysgalactiae	ICE	48499	1339184..1387682	rlmD	MOBP1,MOBQ	typeFATA	NA	0		34.18
GCA_042904165.1	MGCS35828	S. dysgalactiae	ICE	46128	879475..925602	rplL	MOBP1	typeFATA	CACATTTACGAAGTAAAGTATAATGGGTTATACTTTACATG	0		38.6
GCA_042904735.1	MGCS35822	S. dysgalactiae	ICE	48261	1315237..1363497	rplL	MOBP1	typeFATA	CATGTAAAGTATAACCCATTATACTTTACTTCGTAAATGTG	0		38.35
GCA_042904735.1	MGCS35822	S. dysgalactiae	ICE	51098	854599..905696	NA	MOBQ,MOBP1	typeFATA	NA	0		34.52
GCA_042905385.1	MGCS35817	S. dysgalactiae	ICE	48573	1337901..1386473	rlmD	MOBP1,MOBQ	typeFATA	NA	0		34.19
GCA_042905385.1	MGCS35817	S. dysgalactiae	ICE	48261	879520..927780	rplL	MOBP1	typeFATA	CACATTTACGAAGTAAAGTATAATGGGTTATACTTTACATG	0		38.35
GCA_042905975.1	MGCS35810	S. dysgalactiae	ICE	48261	879360..927620	rplL	MOBP1	typeFATA	CACATTTACGAAGTAAAGTATAATGGGTTATACTTTACATG	0		38.34
GCA_042905975.1	MGCS35810	S. dysgalactiae	ICE	48573	1339070..1387642	rlmD	MOBP1,MOBQ	typeFATA	NA	0		34.18
GCA_042906585.1	MGCS35808	S. dysgalactiae	ICE	48573	1340734..1389306	rlmD	MOBP1,MOBQ	typeFATA	NA	0		NA
GCA_042906585.1	MGCS35808	S. dysgalactiae	ICE	48261	880803..929063	rplL	MOBP1	typeFATA	NA	0		NA
GCA_042907155.1	MGCS35799	S. dysgalactiae	ICE	48573	1338266..1386838	rlmD	MOBP1,MOBQ	typeFATA	NA	0		34.19
GCA_042907155.1	MGCS35799	S. dysgalactiae	ICE	48261	879477..927737	rplL	MOBP1	typeFATA	CACATTTACGAAGTAAAGTATAATGGGTTATACTTTACATG	0		38.34
GCA_042907745.1	MGCS35798	S. dysgalactiae	ICE	48572	1338997..1387568	rlmD	MOBP1,MOBQ	typeFATA	NA	0		34.19
GCA_042907745.1	MGCS35798	S. dysgalactiae	ICE	48261	880823..929083	rplL	MOBP1	typeFATA	CACATTTACGAAGTAAAGTATAATGGGTTATACTTTACATG	0		38.35
GCA_042908255.1	MGCS35785	S. dysgalactiae	ICE	48261	880803..929063	rplL	MOBP1	typeFATA	CACATTTACGAAGTAAAGTATAATGGGTTATACTTTACATG	0		38.35
GCA_042908255.1	MGCS35785	S. dysgalactiae	ICE	48573	1339201..1387773	rlmD	MOBP1,MOBQ	typeFATA	NA	0		34.19
GCA_042908825.1	MGCS35780	S. dysgalactiae	ICE	48261	880825..929085	rplL	MOBP1	typeFATA	CACATTTACGAAGTAAAGTATAATGGGTTATACTTTACATG	0		38.34
GCA_042908825.1	MGCS35780	S. dysgalactiae	ICE	48573	1339183..1387755	rlmD	MOBP1,MOBQ	typeFATA	NA	0		34.19
GCA_042909395.1	MGCS35777	S. dysgalactiae	ICE	48261	880825..929085	rplL	MOBP1	typeFATA	CACATTTACGAAGTAAAGTATAATGGGTTATACTTTACATG	0		38.35
GCA_042909395.1	MGCS35777	S. dysgalactiae	ICE	48573	1339182..1387754	rlmD	MOBP1,MOBQ	typeFATA	NA	0		34.19
GCA_042909985.1	MGCS35757	S. dysgalactiae	ICE	48261	879472..927732	rplL	MOBP1	typeFATA	CACATTTACGAAGTAAAGTATAATGGGTTATACTTTACATG	0		38.34
GCA_042909985.1	MGCS35757	S. dysgalactiae	ICE	34022	1339800..1373821	NA	MOBP1	typeFATA	NA	0		35.32
GCA_042910495.1	MGCS35755	S. dysgalactiae	ICE	48260	879498..927757	rplL	MOBP1	typeFATA	CACATTTACGAAGTAAAGTATAATGGGTTATACTTTACATG	0		38.34
GCA_042910495.1	MGCS35755	S. dysgalactiae	ICE	48573	1341307..1389879	rlmD	MOBP1,MOBQ	typeFATA	NA	0		34.19
GCA_042911105.1	MGCS35754	S. dysgalactiae	ICE	48261	879593..927853	rplL	MOBP1	typeFATA	CACATTTACGAAGTAAAGTATAATGGGTTATACTTTACATG	0		38.35
GCA_042911105.1	MGCS35754	S. dysgalactiae	ICE	48573	1339985..1388557	rlmD	MOBP1,MOBQ	typeFATA	NA	0		34.19
GCA_042911635.1	MGCS35744	S. dysgalactiae	ICE	48261	929072..977332	rplL	MOBP1	typeFATA	CACATTTACGAAGTAAAGTATAATGGGTTATACTTTACATG	0		38.35
GCA_042911635.1	MGCS35744	S. dysgalactiae	ICE	49899	1389481..1439379	rlmD	MOBP1,MOBQ	typeFATA	NA	0		34.29
GCA_042912165.1	MGCS35741	S. dysgalactiae	ICE	48573	1340001..1388573	rlmD	MOBP1,MOBQ	typeFATA	NA	0		34.19
GCA_042912165.1	MGCS35741	S. dysgalactiae	ICE	48261	879600..927860	rplL	MOBP1	typeFATA	CACATTTACGAAGTAAAGTATAATGGGTTATACTTTACATG	0		38.35
GCA_042912675.1	MGCS35737	S. dysgalactiae	ICE	48261	873582..921842	rplL	MOBP1	typeFATA	CACATTTACGAAGTAAAGTATAATGGGTTATACTTTACATG	0		38.34
GCA_042912675.1	MGCS35737	S. dysgalactiae	ICE	51489	1381435..1432923	rlmD	MOBP1,MOBQ	typeFATA	NA	0		34.58
GCA_042913305.1	MGCS35730	S. dysgalactiae	ICE	50010	1290131..1340140	rlmD	MOBP1,MOBQ	typeFATA	NA	0		34.25
GCA_042913815.1	MGCS35725	S. dysgalactiae	ICE	48572	1340877..1389448	rlmD	MOBP1,MOBQ	typeFATA	NA	0		34.19
GCA_042913815.1	MGCS35725	S. dysgalactiae	ICE	48261	879473..927733	rplL	MOBP1	typeFATA	CACATTTACGAAGTAAAGTATAATGGGTTATACTTTACATG	0		38.34
GCA_042914585.1	MGCS35718	S. dysgalactiae	ICE	48573	1337810..1386382	rlmD	MOBP1,MOBQ	typeFATA	NA	0		34.19
GCA_042914955.1	MGCS35716	S. dysgalactiae	ICE	48573	1337710..1386282	rlmD	MOBP1,MOBQ	typeFATA	NA	0		34.19
GCA_042914955.1	MGCS35716	S. dysgalactiae	ICE	48261	879484..927744	rplL	MOBP1	typeFATA	CACATTTACGAAGTAAAGTATAATGGGTTATACTTTACATG	0		38.35
GCA_042915565.1	MGCS35714	S. dysgalactiae	ICE	48261	879441..927701	rplL	MOBP1	typeFATA	CACATTTACGAAGTAAAGTATAATGGGTTATACTTTACATG	0		38.34
GCA_042915565.1	MGCS35714	S. dysgalactiae	ICE	51489	1387295..1438783	rlmD	MOBP1,MOBQ	typeFATA	NA	0		34.57
GCA_042916075.1	MGCS35713	S. dysgalactiae	ICE	49131	1341323..1390453	rlmD	MOBP1,MOBQ	typeFATA	NA	0		34.56
GCA_042916075.1	MGCS35713	S. dysgalactiae	ICE	48261	879181..927441	rplL	MOBP1	typeFATA	CACATTTACGAAGTAAAGTATAATGGGTTATACTTTACATG	0		38.34
GCA_042916705.1	MGCS35710	S. dysgalactiae	ICE	48261	879433..927693	rplL	MOBP1	typeFATA	NA	0		NA
GCA_042916705.1	MGCS35710	S. dysgalactiae	ICE	51489	1387287..1438775	rlmD	MOBP1,MOBQ	typeFATA	NA	0		NA
GCA_042917235.1	MGCS35707	S. dysgalactiae	ICE	48261	880676..928936	rplL	MOBP1	typeFATA	CACATTTACGAAGTAAAGTATAATGGGTTATACTTTACATG	0		38.35
GCA_042917235.1	MGCS35707	S. dysgalactiae	ICE	48573	1338961..1387533	rlmD	MOBP1,MOBQ	typeFATA	NA	0		34.19
GCA_042917805.1	MGCS35706	S. dysgalactiae	ICE	48261	879470..927730	rplL	MOBP1	typeFATA	CACATTTACGAAGTAAAGTATAATGGGTTATACTTTACATG	0		38.34
GCA_042917805.1	MGCS35706	S. dysgalactiae	ICE	48572	1340873..1389444	rlmD	MOBP1,MOBQ	typeFATA	NA	0		34.19
GCA_042918355.1	MGCS35705	S. dysgalactiae	ICE	48573	1339501..1388073	rlmD	MOBP1,MOBQ	typeFATA	NA	0		34.19
GCA_042918355.1	MGCS35705	S. dysgalactiae	ICE	48261	879424..927684	rplL	MOBP1	typeFATA	CACATTTACGAAGTAAAGTATAATGGGTTATACTTTACATG	0		38.35
GCA_042920665.1	MGCS35703	S. dysgalactiae	ICE	48261	879474..927734	rplL	MOBP1	typeFATA	CACATTTACGAAGTAAAGTATAATGGGTTATACTTTACATG	0		38.34
GCA_042920665.1	MGCS35703	S. dysgalactiae	ICE	48573	1337926..1386498	rlmD	MOBP1,MOBQ	typeFATA	NA	0		34.19
GCA_042918885.1	MGCS35698	S. dysgalactiae	ICE	48261	879454..927714	rplL	MOBP1	typeFATA	CACATTTACGAAGTAAAGTATAATGGGTTATACTTTACATG	0		38.34
GCA_042918885.1	MGCS35698	S. dysgalactiae	ICE	51489	1387306..1438794	rlmD	MOBP1,MOBQ	typeFATA	NA	0		34.58
GCA_042921085.1	MGCS35689	S. dysgalactiae	ICE	48573	1333636..1382208	rlmD	MOBP1,MOBQ	typeFATA	NA	0		34.19
GCA_042921085.1	MGCS35689	S. dysgalactiae	ICE	48261	873560..921820	rplL	MOBP1	typeFATA	CACATTTACGAAGTAAAGTATAATGGGTTATACTTTACATG	0		38.35
GCA_042921695.1	MGCS35685	S. dysgalactiae	ICE	51374	1335129..1386502	rlmD	MOBP1,MOBQ	typeFATA	NA	0		34.55
GCA_042921695.1	MGCS35685	S. dysgalactiae	ICE	48261	879483..927743	rplL	MOBP1	typeFATA	CACATTTACGAAGTAAAGTATAATGGGTTATACTTTACATG	0		38.34
GCA_042922305.1	MGCS35681	S. dysgalactiae	ICE	48261	879498..927758	rplL	MOBP1	typeFATA	CACATTTACGAAGTAAAGTATAATGGGTTATACTTTACATG	0		38.35
GCA_042922305.1	MGCS35681	S. dysgalactiae	ICE	48573	1337856..1386428	rlmD	MOBP1,MOBQ	typeFATA	NA	0		NA
GCA_042922855.1	MGCS35679	S. dysgalactiae	ICE	48573	1286837..1335409	rlmD	MOBP1,MOBQ	typeFATA	NA	0		34.19
GCA_042923325.1	MGCS35678	S. dysgalactiae	ICE	48261	879475..927735	rplL	MOBP1	typeFATA	CACATTTACGAAGTAAAGTATAATGGGTTATACTTTACATG	0		38.35
GCA_042923325.1	MGCS35678	S. dysgalactiae	ICE	48566	1337861..1386426	rlmD	MOBP1,MOBQ	typeFATA	NA	0		34.2
GCA_042924555.1	MGCS35665	S. dysgalactiae	ICE	48261	879476..927736	rplL	MOBP1	typeFATA	CACATTTACGAAGTAAAGTATAATGGGTTATACTTTACATG	0		38.35
GCA_042924555.1	MGCS35665	S. dysgalactiae	ICE	48572	1339736..1388307	rlmD	MOBP1,MOBQ	typeFATA	NA	0		34.19
GCA_042925125.1	MGCS35660	S. dysgalactiae	ICE	48261	920371..968631	rplL	MOBP1	typeFATA	CACATTTACGAAGTAAAGTATAATGGGTTATACTTTACATG	0		38.34
GCA_042925125.1	MGCS35660	S. dysgalactiae	ICE	48573	1378653..1427225	rlmD	MOBP1,MOBQ	typeFATA	NA	0		34.19
GCA_042925415.1	MGCS35648	S. dysgalactiae	ICE	48261	879498..927758	rplL	MOBP1	typeFATA	CACATTTACGAAGTAAAGTATAATGGGTTATACTTTACATG	0		38.34
GCA_042925425.1	MGCS35642	S. dysgalactiae	ICE	48261	879499..927759	rplL	MOBP1	typeFATA	CACATTTACGAAGTAAAGTATAATGGGTTATACTTTACATG	0		38.35
GCA_042925425.1	MGCS35642	S. dysgalactiae	ICE	48573	1337857..1386429	rlmD	MOBP1,MOBQ	typeFATA	NA	0		34.19
GCA_042925715.1	MGCS35633	S. dysgalactiae	ICE	48573	1341253..1389825	rlmD	MOBP1,MOBQ	typeFATA	NA	0		34.19
GCA_042925715.1	MGCS35633	S. dysgalactiae	ICE	48261	879602..927862	rplL	MOBP1	typeFATA	CACATTTACGAAGTAAAGTATAATGGGTTATACTTTACATG	0		38.35
GCA_000317855.1	AC-2713	S. dysgalactiae	ICE	49098	1241504..1290601	rplL	MOBP1	typeFATA	NA	0		35.54
GCA_900635345.1	NCTC4669	S. dysgalactiae	ICE	26875	530579..557453	rplL	MOBP1	typeFATA	NA	0		39.01
GCA_900635345.1	NCTC4669	S. dysgalactiae	ICE	65258	923370..988627	NA	MOBP1	typeFATA	NA	0		36.66
GCA_900636815.1	NCTC6181	S. dysgalactiae	ICE	41704	659117..700820	NA	MOBP1,MOBT	typeFATA	AGGGGCTTGGGGATTTCCCCAACA	0		38.79
GCA_900636815.1	NCTC6181	S. dysgalactiae	ICE	27359	1569125..1596483	rplL	MOBP1	typeFATA	NA	0		39.63
GCA_901542365.1	NCTC8546	S. dysgalactiae	ICE	38760	254236..292995	tRNA-Ala	MOBP1	typeFATA	CTAAGGGGCTTGGGGATTTTCCCCAA	0		39.39
GCA_901543615.1	NCTC9413	S. dysgalactiae	ICE	61554	901844..963397	rplL	MOBP1	typeFATA	NA	0		37.96
GCA_901543725.1	NCTC6403	S. dysgalactiae	ICE	32294	565110..597403	rplL	MOBP1	typeFATA	NA	0		39.64
GCA_901543725.1	NCTC6403	S. dysgalactiae	ICE	41361	1084567..1125927	NA	MOBP1	typeFATA	NA	0		38.79
GCA_901544215.1	NCTC11556	S. dysgalactiae	ICE	61998	1336964..1398961	rlmD	MOBP1,MOBQ	typeFATA	NA	0		34.65
GCA_901544215.1	NCTC11556	S. dysgalactiae	ICE	61553	878889..940441	rplL	MOBP1	typeFATA	NA	0		37.95
GCA_900475185.1	NCTC6179	S. dysgalactiae	ICE	27359	1272527..1299885	rplL	MOBP1	typeFATA	NA	0		39.63
GCA_900475185.1	NCTC6179	S. dysgalactiae	ICE	41704	2168190..2209893	NA	MOBT,MOBP1	typeFATA	TGTTGGGGAAATCCCCAAGCCCCT	0		38.79
GCA_900475255.1	NCTC9414	S. dysgalactiae	ICE	53286	1293423..1346708	rplL	MOBP1	typeFATA	CATGTAAAGTATAACCCATTATACTTTACTTCGTAAATGTG	0		38.06
GCA_900475145.1	NCTC5371	S. dysgalactiae	ICE	27361	542949..570309	rplL	MOBP1	typeFATA	NA	0		39.81
GCA_900475725.1	NCTC7136	S. dysgalactiae	ICE	52060	1511495..1563554	rplL	MOBP1	typeFATA	CATGTAAAGTATAAACCCATTATACTTTACTTCGTAAATGTG	0		38.18
GCA_000219765.1	ATCC 35246	S. equi subsp	ICE	26360	1882934..1909293	rplL	MOBP1	typeFATA	NA	0		39.08
GCA_000696505.1	CY	S. equi subsp	ICE	26343	20626..46968	rplL	MOBP1	typeFATA	NA	0		39.08
GCA_009676645.1	OH-71905	S. equi subsp	ICE	26342	1898629..1924970	rplL	MOBP1	typeFATA	NA	0		39.09
GCA_009676725.1	AZ-45470	S. equi subsp	ICE	28794	716235..745028	NA	MOBQ	typeFATA	NA	0		34.6
GCA_009676685.2	TN-714097	S. equi subsp	ICE	26342	1898139..1924480	rplL	MOBP1	typeFATA	NA	0		39.09
GCA_015689395.1	SEZ13	S. equi subsp	ICE	43918	759466..803383	rplL	MOBP1	typeFATA	NA	0		35.16
GCA_015689415.1	SEZ14	S. equi subsp	ICE	37033	1960831..1997863	rplL	MOBP1	typeFATA	NA	0		39.39
GCA_015689455.1	SEZ33	S. equi subsp	ICE	39772	1285694..1325465	rlmD	MOBP1,MOBQ	typeFATA	NA	0		35.07
GCA_015767555.1	SEZ46	S. equi subsp	ICE	40860	454897..495756	tRNA-Ser	MOBP1	typeFATA	NA	0		38.56
GCA_015767555.1	SEZ46	S. equi subsp	ICE	58268	735497..793764	NA	MOBQ,MOBP1	typeFATA	NA	0		34.87
GCA_021029665.1	SEZ_14-145	S. equi subsp	ICE	43836	1059628..1103463	NA	MOBP1	typeFATA	NA	0		42.81
GCA_021029665.1	SEZ_14-145	S. equi subsp	ICE	30226	1889378..1919603	rplL	MOBP1	typeFATA	NA	1	tet(W)	43.06
GCA_030480405.1	BJ-1	S. equi subsp	ICE	54037	694164..748200	rplL	MOBP1	typeFATA	NA	0		36.08
GCA_033037175.1	ZHZ211	S. equi subsp	ICE	42557	1386991..1429547	rplL	MOBP1	typeFATA	NA	0		35.98
GCA_033037495.1	JMC111	S. equi subsp	ICE	42557	1387010..1429566	rplL	MOBP1	typeFATA	NA	0		35.98
GCA_033037535.1	HT321	S. equi subsp	ICE	59422	699632..759053	rplL	MOBP1	typeFATA	NA	1	lsa(C)	36.44
GCA_900636415.1	NCTC12091	S. equi subsp	ICE	28926	720306..749231	rplL	MOBP1	typeFATA	NA	0		35.75
GCA_901472575.1	NCTC11854	S. equi subsp	ICE	57816	107359..165174	rplL	MOBP1	typeFATA	NA	0		40.22
GCA_901472575.1	NCTC11854	S. equi subsp	ICE	64536	1885545..1950080	NA	MOBP1	typeFATA	NA	0		38.51
GCA_901542385.1	NCTC4675	S. equi subsp	ICE	45708	706054..751761	rlmD	MOBP1,MOBQ	typeFATA	NA	1	lsa(C)	35.23
GCA_900474805.1	NCTC7022	S. equi subsp	ICE	45661	1073132..1118792	rplL	MOBP1	typeFATA	NA	0		38.58
GCA_900474805.1	NCTC7022	S. equi subsp	ICE	64535	1548628..1613162	NA	MOBP1	typeFATA	NA	0		38.51
GCA_900474805.1	NCTC7022	S. equi subsp	ICE	36800	707262..744061	NA	MOBP1	typeFATA	NA	0		35.32
GCA_900474875.1	NCTC12090	S. equi subsp	ICE	43682	732225..775906	rplL	MOBP1	typeFATA	NA	0		34.63
GCA_900475435.1	NCTC11824	S. equi subsp	ICE	34771	713659..748429	NA	MOBQ,MOBP1	typeFATA	NA	0		35.49
GCA_002073515.2	FDAARGOS_251	S. equinus	ICE	22777	38495..61271	rpmH	profile_MOBT	typeFA	ACTTAACCCCCCGTATCTAACAGGGGGGTACAAATCGACAGGAAACAGTCAAAAAAACATTAGAAAATCCTTTGGTTACAAGGGATTTACAAAATTTCAGCGTATGTCAAATGGGCTTTAAAAGTTGACATAC	2	tet(M); erm(B)	37.92
GCA_009758075.1	CNU 77-23	S. equinus	ICE	17524	1096675..1114198	galM	profile_MOBT	typeFA	ACTTAACCCCCCGTATCTAACAGGGGGGTACAAATCGACAGGAAACAGTCAAAAAAACATTAGAAAATCCTTTGGTTACAAGGGATTTACAAAATTTCAGCGTATGTCAAATGGGCTTTAAAAGTTGACATAC	1	tet(M)	38.94
GCA_009758095.1	CNU G6	S. equinus	ICE	17524	93005..110528	galM	profile_MOBT	typeFA	GTATGTCAACTTTTAAAGCCCATTTGACATACGCTGAAATTTTGTAAATCCCTTGTAACCAAAGGATTTTCTAATGTTTTTTTGACTGTTTCCTGTCGATTTGTACCCCCCTGTTAGATACGGGGGGTTAAGT	1	tet(M)	39.06
GCA_049393805.1	NM-A1	S. equinus	ICE	17524	663047..680570	galM	profile_MOBT	typeFA	ACTTAACCCCCCGTATCTAACAGGGGGGTACAAATCGACAGGAAACAGTCAAAAAAACATTAGAAAATCCTTTGGTTACAAGGGATTTACAAAATTTCAGCGTATGTCAAATGGGCTTTAAAAGTTGACATAC	1	tet(M)	38.98
GCA_000270145.1	ATCC 43143	S. gallolyticus	ICE	17524	1643549..1661072	galM	profile_MOBT	typeFA	GTATGTCAACTTTTAAAGCCCATTTGACATACGCTGAAATTTTGTAAATCCCTTGTAACCAAAGGATTTTCTAATGTTTTTTTGACTGTTTCCTGTCGATTTGTACCCCCCTGTTAGATACGGGGGGTTAAGT	1	tet(M)	39.03
GCA_002000985.1	DSM 16831	S. gallolyticus	ICE	38065	1502904..1540968	rplL	MOBP1	typeFATA	NA	0		36.71
GCA_002000985.1	DSM 16831	S. gallolyticus	ICE	58694	1591298..1649991	NA	MOBP1	typeFATA	NA	0		39.79
GCA_012273095.1		S. gallolyticus	ICE	24825	417597..442421	NA	MOBV,profile_MOBT	typeFA	GTATGTCAACTTTTAAAGCCCATTTGACATACGCTGAAATTTTGTAAATCCCTTGTAACCAAAGGATTTTCTAATGTTTTTTTGACTGTTTCCTGTCGATTTGTACCCCCCTGTTAGATACCGAGGGGTT	3	erm(T); tet(L); tet(M)	37.8
GCA_012273095.1		S. gallolyticus	ICE	48149	245938..294086	rplL	MOBP1	typeFATA	NA	0		35.63
GCA_013267695.1	FDAARGOS_755	S. gallolyticus	ICE	17524	354862..372385	galM	profile_MOBT	typeFA	GTATGTCAACTTTTAAAGCCCATTTGACATACGCTGAAATTTTGTAAATCCCTTGTAACCAAAGGATTTTCTAATGTTTTTTTGACTGTTTCCTGTCGATTTGTACCCCCCTGTTAGATACGGGGGGTTAAGT	1	tet(M)	38.98
GCA_019021805.1	TX20005	S. gallolyticus	ICE	17524	1810825..1828348	galM	profile_MOBT	typeFA	GTATGTCAACTTTTAAAGCCCATTTGACATACGCTGAAATTTTGTAAATCCCTTGTAACCAAAGGATTTTCTAATGTTTTTTTGACTGTTTCCTGTCGATTTGTACCCCCCTGTTAGATACGGGGGGTTAAGT	1	tet(M)	38.98
GCA_027474865.2	XH2168	S. gallolyticus	ICE	56924	1331418..1388341	rplL	firmi_Rep_2,MOBP1	typeFATA	NA	6	tet(L); tet(O/W/32/O); erm(B); ant(6)-Ia; lnu(B); lsa(E)	34.68
GCA_050562185.1	202	S. gallolyticus	ICE	69508	1431888..1501395	NA	MOBP1,MOBV	typeFATA	NA	1	tet(O)	38.32
GCA_050562185.1	202	S. gallolyticus	ICE	21782	2079939..2101720	rplL	MOBP1	typeFATA	NA	0		40.09
GCA_000027185.1	UCN34	S. gallolyticus	ICE	48026	1738036..1786061	rplL	MOBT,MOBV,profile_MOBT	typeFA	GTATGTCAACTTTTAAAGCCCATTTGACATACGCTGAAATTTTGTAAATCCCTTGTAACCAAAGGATTTTCTAATGTTTTTTTGACTGTTTCCTGTCGATTTGTACCCCCCTGTTAGATACGGGGGGTTAAGT	2	tet(L); tet(M)	36.32
GCA_000027185.1	UCN34	S. gallolyticus	ICE	34383	288111..322493	rplL	MOBP1	typeFATA	NA	0		36.55
GCA_000203195.1	ATCC BAA-2069	S. gallolyticus	ICE	21689	2092841..2114529	rplL	MOBP1	typeFATA	NA	0		39.97
GCA_000203195.1	ATCC BAA-2069	S. gallolyticus	ICE	26491	1420013..1446503	NA	MOBP1	typeFATA	NA	0		39.69
GCA_900475715.1	NCTC13773	S. gallolyticus	ICE	38065	1503521..1541585	rplL	MOBP1	typeFATA	NA	0		36.71
GCA_900475715.1	NCTC13773	S. gallolyticus	ICE	58694	1591915..1650608	rplL	MOBP1	typeFATA	NA	0		39.79
GCA_001281105.1	KCOM 1506 (= ChDC B679)	S. gordonii	ICE	43313	1702542..1745854	rpmH	profile_MOBT	typeFA	ACTTAACCCCCCGTATCTAACAGGGGGGTACAAATCGACAGGAAACAGTCAAAAAAACATTAGAAAATCCTTTGGTTACAAGGGATTTACAAAATTTCAGCGTATGTCAAATGGGCTTTAAAAGTTGACATAC	2	tet(M); erm(B)	38.2
GCA_003627155.1	ChDC B345	S. gwangjuense	ICE	24962	57414..82375	rplL	MOBP1	typeFATA	AAGGGGCTTGGGGATTTCCCCAA	0		39.16
GCA_000479335.1	I-G2	S. ilei	ICE	54087	625097..679183	rplL	MOBP1	typeFATA	NA	0		33.19
GCA_000246835.1	CJ18	S. infantarius	ICE	37827	1798042..1835868	rplL	MOBP1	typeFATA	NA	0		34.25
GCA_030020405.1	GXAS200705	S. iniae	ICE	99390	1260452..1359841	rplL	MOBP1	typeFATA	NA	0		38.32
GCA_000463355.1	B196	S. intermedius	ICE	36767	994323..1031089	rplL	MOBP1	typeFATA	NA	0		34.73
GCA_000463355.1	B196	S. intermedius	ICE	41861	1365547..1407407	NA	MOBP1	typeFATA	NA	0		34.58
GCA_000463385.1	C270	S. intermedius	ICE	48845	631366..680210	NA	profile_MOBT,MOBP1	typeFA	ACTTAACCCCCCGTATCTAACAGGGGGGTACAAATCGACAGGAAACAGTCAAAAAAACATTAGAAAATCCTTTGGTTACAAGGGATTTACAAAATTTCAGCGTATGTCAAATGGGCTTTAAAAGTTGACATAC	2	erm(B); tet(M)	36.07
GCA_000463385.1	C270	S. intermedius	ICE	57093	627092..684184	NA	profile_MOBT,MOBP1	typeFATA	ACTTAACCCCCCGTATCTAACAGGGGGGTACAAATCGACAGGAAACAGTCAAAAAAACATTAGAAAATCCTTTGGTTACAAGGGATTTACAAAATTTCAGCGTATGTCAAATGGGCTTTAAAAGTTGACATAC	0		35.84
GCA_000463385.1	C270	S. intermedius	ICE	34816	1014792..1049607	rplL	MOBP1	typeFATA	NA	0		34.85
GCA_001296205.1	KCOM 1545	S. intermedius	ICE	17470	1873350..1890819	NA	profile_MOBT	typeFA	ACCTAACCCCCCGTATCTAACAGGGGGGTACAAATCGACAGGAAACAGTCAAAAAAATAGCAGAAAATTCTTTGGTTACAAGGAGTTTAGAAAATTTCGTGGTATGTCAAATGAGCTTCAATAGTTGACATAC	1	tet(M)	39.16
GCA_000441535.1	033	S. lutetiensis	ICE	17528	1530479..1548006	rpmH	profile_MOBT	typeFA	ACTTAACCCCCCGTATCTAACAGGGGGGTACAAATCGACAGGAAACAGTCAAAAAAACATTAGAAAATCCTTTGGTTACAAGGGATTTACAAAATTTCAGCGTATGTCAAATGGGCTTTAAAAGTTGACATAC	1	tet(M)	39.14
GCA_900635935.1	NCTC11436	S. lutetiensis	ICE	17527	143962..161488	rpmH	profile_MOBT	typeFA	ACTTAACCCCCCGTATCTAACAGGGGGGTACAAATCGACAGGAAACAGTCAAAAAAACATTAGAAAATCCTTTGGTTACAAGGGATTTACAAAATTTCAGCGTATGTCAAATGGGCTTTAAAAGTTGACATAC	1	tet(M)	39.13
GCA_026194135.2	E37	S. macedonicus	ICE	63007	264088..327094	NA	MOBP1,profile_MOBT	typeFATA	ACTTAACCCCCCGTATCTAACAGGGGGGTACAAATCGACAGGAAACAGGCAAAAAAATAGTAGAAAATCCTTTGGTTACAAGGGATTTAGAAAATTTCGGTGTATGTCAAATGAGCTTTAAAAGTTGACATAC	0		36.28
GCA_026194135.2	E37	S. macedonicus	ICE	129890	1500727..1630616	NA	MOBP1,MOBV	typeFATA	NA	4	erm(B); tet(O); aph(3')-III; ant(6)-Ia	37.76
GCA_026194135.2	E37	S. macedonicus	ICE	27011	1409734..1436744	rplL	MOBP1	typeFATA	NA	0		34.99
GCA_026194135.2	E37	S. macedonicus	ICE	63007	264088..327094	NA	MOBP1,profile_MOBT	typeFA	ACTTAACCCCCCGTATCTAACAGGGGGGTACAAATCGACAGGAAACAGGCAAAAAAATAGTAGAAAATCCTTTGGTTACAAGGGATTTAGAAAATTTCGGTGTATGTCAAATGAGCTTTAAAAGTTGACATAC	1	tet(M)	36.28
GCA_029866925.1	SGM CIP105683	S. macedonicus	ICE	135757	1358216..1493972	rplL	MOBP1	typeFATA	NA	0		37.35
GCA_900636525.1	NCTC11169	S. milleri	ICE	59066	1109280..1168345	rlmD	MOBP1,MOBQ	typeFATA	NA	0		34.43
GCA_900636715.1	NCTC10708	S. milleri	ICE	59305	1146838..1206142	rplL	MOBP1	typeFATA	NA	0		36.88
GCA_014467095.1	Nm-65	S. mitis	ICE	29045	1778619..1807663	rplL	profile_MOBT	typeFA	GTATGTCAACTTTTAAAGCCCATTTGACATACGCTGAAATTTTGTAAATCCCTTGTAACCAAAGGATTTTCTAATGTTTTTTTGACTGTTTCCTGTCGATTTGTACCCCCCTGTTAGATACGGGGGGTTAAGT	3	mef(A); msr(D); tet(M)	36.81
GCA_001560895.1	SVGS_061	S. mitis	ICE	33725	1081127..1114851	rplL	profile_MOBT	typeFA	GTATGTCAACTTTTAAAGCCCATTTGACATACGCTGAAATTTTGTAAATCCCTTGTAACCAAAGGATTTTCTAATGTTTTTTTGACTGTTTCCTGTCGATTTGTACCCCCCTGTTAGATACGGGGGGTTAAGT	4	mef(A); msr(D); lnu(C); tet(M)	38.27
GCA_001560895.1	SVGS_061	S. mitis	ICE	23856	861022..884877	tRNA-Arg	MOBP1	typeFATA	NA	0		36.53
GCA_001560895.1	SVGS_061	S. mitis	ICE	41935	1078358..1120292	rplL	profile_MOBT	typeFATA	GTATGTCAACTTTTAAAGCCCATTTGACATACGCTGAAATTTTGTAAATCCCTTGTAACCAAAGGATTTTCTAATGTTTTTTTGACTGTTTCCTGTCGATTTGTACCCCCCTGTTAGATACGGGGGGTTAAGT	0		37.08
GCA_013305725.1	S022-V3-A4	S. mitis	ICE	73755	1062689..1136443	NA	MOBP1	typeFATA	NA	0		33.56
GCA_013305725.1	S022-V3-A4	S. mitis	ICE	26554	1822278..1848831	rplL	MOBP1	typeFATA	TTGGGGAAATCCCCAAGCCCCTT	0		39.69
GCA_018985535.2	E689	S. mitis	ICE	59430	966957..1026386	NA	MOBP1,profile_MOBT	typeFA	GTATGTCAACTTTTAAAGCCCATTTGACATACGCTGAAATTTTGTAAATCCCTTGTAACCAAAGGATTTTCTAATGTTTTTTTGACTGTTTCCTGTCGATTTGTACCCCCCTGTTAGATA	3	erm(B); tet(M); lsa(C)	35.35
GCA_018985535.2	E689	S. mitis	ICE	62199	966957..1029155	NA	MOBP1,profile_MOBT	typeFATA	GTATGTCAACTTTTAAAGCCCATTTGACATACGCTGAAATTTTGTAAATCCCTTGTAACCAAAGGATTTTCTAATGTTTTTTTGACTGTTTCCTGTCGATTTGTACCCCCCTGTTAGATA	0		35.32
GCA_019336965.2	E647	S. mitis	ICE	66278	929984..996261	rplL	MOBP1	typeFATA	NA	0		33.71
GCA_000027165.1	B6	S. mitis	ICE	47061	1297446..1344506	NA	profile_MOBT	typeFA	GCCCCCTCTATCTAACAGGGGGG	1	tet(M)	36.91
GCA_965111725.1		S. mitis	ICE	53463	1003803..1057265	rplL	profile_MOBT	typeFATA	GTATGTCAACTTTTAAAGCCCATTTGACATACGCTGAAATTTTGTAAATCCCTTGTAACCAAAGGATTTTCTAATGTTTTTTTGACTGTTTCCTGTCGATTTGTACCCCCCTGTTAGATACGGGGGGTTAAGT	2	tet(M); erm(B)	34.36
GCA_965111745.1		S. mitis	ICE	20374	1893851..1914224	rplL	profile_MOBT	typeFA	GTATGTCAACTTTTAAAGCCCATTTGACATACGCTGAAATTTTGTAAATCCCTTGTAACCAAAGGATTTTCTAATGTTTTTTTGACTGTTTCCTGTCGATTTGTACCCCCCTGTTAGATACGGGGGGTTAAGT	2	tet(M); erm(B)	38.43
GCA_965111715.1		S. mitis	ICE	27709	579827..607535	rplL	profile_MOBT	typeFA	GTATGTCAACTTTTAAAGCCCATTTGACATACGCTGAAATTTTGTAAATCCCTTGTAACCAAAGGATTTTCTAATGTTTTTTTGACTGTTTCCTGTCGATTTGTACCCCCCTGTTAGATACGGGGGGTTAAGT	2	erm(B); tet(M)	38.75
GCA_965111735.1		S. mitis	ICE	30989	1413155..1444143	NA	profile_MOBT	typeFA	GTATGTCAACTTTTAAAGCCCATTTGACATACGCTGAAATTTTGTAAATCCCTTGTAACCAAAGGATTTTCTAATGTTTTTTTGACTGTTTCCTGTCGATTTGTACCCCCCTGTTAGAT	2	tet(M); erm(B)	38.22
GCA_002356415.1	osk_001	S. oralis	ICE	69131	703237..772367	rplL	profile_MOBT,MOBP1	typeFA	GTATGTCAACTTTTAAAGCCCATTTGACATACGCTGAAATTTTGTAAATCCCTTGTAACCAAAGGATTTTCTAATGTTTTTTTGACTGTTTCCTGTCGATTTGTACCCCCCTGTTAGATACGGGGGGTTAAGT	3	mef(A); msr(D); tet(M)	34.96
GCA_002356415.1	osk_001	S. oralis	ICE	70966	701402..772367	rplL	profile_MOBT,MOBP1	typeFATA	GTATGTCAACTTTTAAAGCCCATTTGACATACGCTGAAATTTTGTAAATCCCTTGTAACCAAAGGATTTTCTAATGTTTTTTTGACTGTTTCCTGTCGATTTGTACCCCCCTGTTAGATACGGGGGGTTAAGT	0		34.93
GCA_001983955.1	S.MIT/ORALIS-351	S. oralis	ICE	60373	1169712..1230084	rplL	MOBP1	typeFATA	NA	0		32.9
GCA_002386345.1	FDAARGOS_367	S. oralis	ICE	49646	646403..696048	rplL	MOBP1	typeFATA	NA	0		32.6
GCA_021497885.1	SOD	S. oralis	ICE	25082	845148..870229	NA	profile_MOBT	typeFA	TATCTAACAGGGGGGTACAAATCGACAGGAAACAGTCAAAAAAACATTAGAAAATCCTTTGGTTACAAGGGATTTACAAAATTTCAGCGTATGTCAAATGGGCTTTAAAAGTTGACATAC	2	erm(B); tet(M)	37.1
GCA_021497945.1	SOT	S. oralis	ICE	69999	708024..778022	rplL	MOBP1,profile_MOBT	typeFA	ACTTAACCCCCCGTATCTAACAGGGGGGTACAAATCGACAGGAAACAGTCAAAAAAACATTAGAAAATCCTTTGGTTACAAGGGATTTACAAAATTTCAGCGTATGTCAAATGGGCTTTAAAAGTTGACATAC	2	tet(M); erm(B)	34.68
GCA_021497945.1	SOT	S. oralis	ICE	74274	703749..778022	rplL	MOBP1,profile_MOBT	typeFATA	ACTTAACCCCCCGTATCTAACAGGGGGGTACAAATCGACAGGAAACAGTCAAAAAAACATTAGAAAATCCTTTGGTTACAAGGGATTTACAAAATTTCAGCGTATGTCAAATGGGCTTTAAAAGTTGACATAC	0		34.62
GCA_021497945.1	SOT	S. oralis	ICE	28149	1239257..1267405	tRNA-Arg	MOBP1	typeFATA	NA	0		37.96
GCA_013488045.1		S. oralis	ICE	27068	690077..717144	rplL	MOBP1	typeFATA	AAGGGGCTTGGGGATTTCCCCAA	0		39.57
GCA_016127555.1	FDAARGOS_1020	S. oralis	ICE	25710	1513095..1538804	rplL	MOBP1	typeFATA	AAGGGGCTTGGGGATTTCCCCAA	0		39.84
GCA_023611505.1	HP01	S. oralis	ICE	22931	1435779..1458709	NA	MOBP1	typeFATA	TTGGGGAAAAGCCCCAAGCCCCTTAG	0		38.35
GCA_023611505.1	HP01	S. oralis	ICE	22931	1818957..1841887	rplL	MOBP1	typeFATA	TTGGGGAAAAGCCCCAAGCCCCTTAG	0		38.35
GCA_018448725.2	E628	S. oralis	ICE	23001	1666339..1689339	rplL	MOBP1	typeFATA	NA	0		38.25
GCA_018448775.2	E649	S. oralis	ICE	24687	96963..121649	rplL	MOBP1	typeFATA	AAGGGGCTTGGGGATTTCCCCAA	0		40.17
GCA_019458035.2	E665	S. oralis	ICE	26959	2508..29466	rplL	MOBP1	typeFATA	AAGGGGCTTGGGGATTTCCCCAA	0		39.77
GCA_018985475.2	E684	S. oralis	ICE	40718	781604..822321	rplL	MOBP1	typeFATA	NA	0		34.28
GCA_018985495.2	E734	S. oralis	ICE	34123	837610..871732	NA	MOBP1	typeFATA	NA	0		34.82
GCA_018985495.2	E734	S. oralis	ICE	25269	1809176..1834444	rplL	MOBP1	typeFATA	TTGGGGAAATCCCCAAGCCCCTT	0		39.67
GCA_000253155.1	Uo5	S. oralis	ICE	22785	1824852..1847636	rpmH	profile_MOBT	typeFA	ACTTAACCCCCCGTATCTAACAGGGGGGTACAAATCGACAGGAAACAGTCAAAAAAACATTAGAAAATCCTTTGGTTACAAGGGATTTACAAAATTTCAGCGTATGTCAAATGGGCTTTAAAAGTTGACATAC	2	tet(M); erm(B)	37.82
GCA_900637025.1	NCTC11427	S. oralis	ICE	25710	1244288..1269997	rplL	MOBP1	typeFATA	TTGGGGAAATCCCCAAGCCCCTT	0		39.84
GCA_018137985.1	HKU75	S. oriscaviae	ICE	22951	1171200..1194150	NA	MOBP1	typeFATA	NA	0		41.62
GCA_018137985.1	HKU75	S. oriscaviae	ICE	21906	1473387..1495292	rplL	MOBP1	typeFATA	AGGGGCTTGGGGATTTCCCCAAAAG	0		42.64
GCA_037076355.1	SP4011	S. parapneumoniae	ICE	28076	1743702..1771777	NA	MOBP1	typeFATA	NA	0		36.79
GCA_037076355.1	SP4011	S. parapneumoniae	ICE	28076	2223363..2251438	rplL	MOBP1	typeFATA	NA	0		36.79
GCA_037076355.1	SP4011	S. parapneumoniae	ICE	22798	616174..638971	rplL	profile_MOBT	typeFA	GTATGTCAACTTTTAAAGCCCATTTGACATACGCTGAAATTTTGTAAATCCCTTGTAACCAAAGGATTTTCTAATGTTTTTTTGACTGTTTCCTGTCGATTTGTACCCCCCTGTTAGATACGGGGGGTTAAGT	2	erm(B); tet(M)	37.95
GCA_000262145.1	FW213	S. parasanguinis	ICE	48269	1098447..1146715	rplL	MOBP1	typeFATA	NA	0		34.22
GCA_018619375.2	E669	S. parasanguinis	ICE	83553	1123095..1206647	NA	MOBV,MOBP1	typeFATA	NA	3	tet(O); mef(A); msr(D)	36.35
GCA_021654435.1	SUT-7	S. parasuis	ICE	47835	1247619..1295453	rplL	MOBP1	typeFATA	NA	0		38.32
GCA_021654455.1	SUT-286	S. parasuis	ICE	16338	993615..1009952	NA	profile_MOBT	typeFA	TGTTTTTTGTCGATTTGTACCCCCCTGTTAGATACGGGGGGTT	0		40.78
GCA_021654455.1	SUT-286	S. parasuis	ICE	17434	1783126..1800559	rplL	profile_MOBT	typeFA	GTATGTCAACTTTTAAAGCCCATTTGACATACGCTGAAATTTTGTAAATCCCTTGTAACCAAAGGATTTTCTAATGTTTTTTTGACTGTTTCCTGTCGATTTGTACCCCCCTGTTAGATACGGGGGGTTAAGT	1	tet(M)	39.07
GCA_021654475.1	SUT-380	S. parasuis	ICE	52757	1190360..1243116	rplL	MOBP1,MOBV	typeFATA	NA	1	tet(O)	39.48
GCA_028751645.1	NN1	S. parasuis	ICE	17524	1266837..1284360	galM	profile_MOBT	typeFA	GTATGTCAACTTTTAAAGCCCATTTGACATACGCTGAAATTTTGTAAATCCCTTGTAACCAAAGGATTTTCTAATGTTTTTTTGACTGTTTCCTGTCGATTTGTACCCCCCTGTTAGATACGGGGGTTAAGT	1	tet(M)	39.06
GCA_018986875.1	H35	S. parasuis	ICE	17523	2039761..2057283	rpmH	profile_MOBT	typeFA	ACTTAACCCCCCGTATCTAACAGGGGGGTACAAATCGACAGGAAACAGTCAAAAAAACATTAGAAAATCCTTTGGTTACAAGGGATTTACAAAATTTCAGCGTATGTCAAATGGGCTTTAAAAGTTGACATAC	1	tet(M)	39.15
GCA_018986875.1	H35	S. parasuis	ICE	36883	2306..39188	NA		typeFATA	NA	0		38.98
GCA_029542045.1	SFJ45	S. parasuis	ICE	42312	1013415..1055726	NA	firmi_Viral_Rep_B1	typeFA	GCCCCCTCTATCTAACAGGGGGG	2	tetA(P); tet(M)	36.38
GCA_044361625.1	1628469	S. parasuis	ICE	32174	1054760..1086933	NA	MOBF,profile_MOBT	typeFA	TTCACCCCCCGTATCTAACAGGGGGGTACAAATCGATAAAAAACAATCAA	0		39.63
GCA_044361625.1	1628469	S. parasuis	ICE	57868	361383..419250	NA	MOBP1,MOBV	typeFATA	NA	1	tet(O)	39.34
GCA_000187935.2	NCFD 2020	S. parauberis	ICE	67518	361615..429132	rplL	MOBP1	typeFATA	NA	0		34.89
GCA_002900385.1	SPOF3K	S. parauberis	ICE	41807	1103432..1145238	rplL	MOBP1	typeFATA	AGGGGCTTGGGGATTTCCCCAA	0		34.03
GCA_032880625.1	KRS02083	S. parauberis	ICE	48835	925116..973950	rplL	MOBP1	typeFATA	AGGGGCTTGGGGATTTCCCCAA	0		34.8
GCA_025152665.1	KSP14	S. parauberis	ICE	17524	533009..550532	galM	profile_MOBT	typeFA	GTATGTCAACTTTTAAAGCCCATTTGACATACGCTGAAATTTTGTAAATCCCTTGTAACCAAAGGATTTTCTAATGTTTTTTTGACTGTTTCCTGTCGATTTGTACCCCCCTGTTAGATACGGGGGGTTAAGT	1	tet(M)	38.99
GCA_025152645.1	KSP10	S. parauberis	ICE	17524	533011..550534	galM	profile_MOBT	typeFA	GTATGTCAACTTTTAAAGCCCATTTGACATACGCTGAAATTTTGTAAATCCCTTGTAACCAAAGGATTTTCTAATGTTTTTTTGACTGTTTCCTGTCGATTTGTACCCCCCTGTTAGATACGGGGGGTTAAGT	1	tet(M)	38.99
GCA_025201235.1	HFTC0064	S. parauberis	ICE	48793	1113545..1162337	rplL	MOBP1	typeFATA	AGGGGCTTGGGGATTTCCCCAA	0		34.8
GCA_000270165.1	ATCC 43144	S. pasteurianus	ICE	42227	1701161..1743387	NA	profile_MOBT,MOBV	typeFA	NA	0		NA
GCA_000270165.1	ATCC 43144	S. pasteurianus	ICE	59858	1138666..1198523	rplL	MOBP1	typeFATA	NA	0		36.87
GCA_042854115.1	k46-0107-A9	S. pasteurianus	ICE	20442	687633..708074	NA	profile_MOBT	typeFA	NA	1	erm(B)	40.08
GCA_042854115.1	k46-0107-A9	S. pasteurianus	ICE	26150	1691635..1717784	NA	profile_MOBT	typeFA	NA	0		39.35
GCA_042854115.1	k46-0107-A9	S. pasteurianus	ICE	20442	1797670..1818111	NA	profile_MOBT	typeFA	NA	1	erm(B)	40.08
GCA_042854115.1	k46-0107-A9	S. pasteurianus	ICE	16361	341258..357618	rpmH	profile_MOBT	typeFA	ACTTAACCCCCCGTATCTAACAGGGGGGTACAAATCGACAGGAAACAGTCAAAAAAACATTAGAAAATCCTTTGGTTACAAGGGATTTACAAAATTTCAGCGTATGTCAAATGGGCTTTAAAAGTTGACATAC	2	tet(M); tet(L)	39.09
GCA_004843545.1	WUSP067	S. pasteurianus	ICE	21607	2083716..2105322	NA	MOBV,profile_MOBT	typeFA	GTATGTCAACTTTTAAAGCCCATTTGACATACGCTGAAATTTTGTAAATCCCTTGTAACCAAAGGATTTTCTAATGTTTTTTTGACTGTTTCCTGTCGATTTGTACCCCCCTGTTAGATACCGAGGGGTT	2	tet(L); tet(M)	38.62
GCA_023161985.2	WUSP070	S. pasteurianus	ICE	27814	240723..268536	NA	profile_MOBT	typeFA	NA	0		42.07
GCA_023161985.2	WUSP070	S. pasteurianus	ICE	21571	1534193..1555763	NA	profile_MOBT	typeFA	NA	0		42.33
GCA_023162015.2	WUSP074	S. pasteurianus	ICE	57797	1255215..1313011	rplL	firmi_Rep_2,MOBP1	typeFATA	NA	6	tet(L); tet(O/W/32/O); erm(B); ant(6)-Ia; lnu(B); lsa(E)	35.09
GCA_033100235.1	WUSP082	S. pasteurianus	ICE	91018	728457..819474	rplL	MOBP1,profile_MOBT	typeFA	CTTAGGGGCTTGGGGATATTCCCCAA	5	lsa(E); lnu(B); ant(6)-Ia; aph(3')-III; erm(B)	34.84
GCA_033100235.1	WUSP082	S. pasteurianus	ICE	22632	2050347..2072978	NA	profile_MOBT	typeFA	NA	1	erm(B)	39.53
GCA_033100235.1	WUSP082	S. pasteurianus	ICE	22980	2363508..2386487	NA	MOBV,profile_MOBT	typeFA	GTATGTCAACTTTTAAAGCCCATTTGACATACGCTGAAATTTTGTAAATCCCTTGTAACCAAAGGATTTTCTAATGTTTTTTTGACTGTTTCCTGTCGATTTGTACCCCCCTGTTAGATACCGAGGGGTT	2	tet(L); tet(M)	38.16
GCA_033100235.1	WUSP082	S. pasteurianus	ICE	144634	674841..819474	NA	MOBV,MOBP1,profile_MOBT	typeFATA	CTTAGGGGCTTGGGGATATTCCCCAA	3	tet(O); erm(B); ant(6)-Ia	36.93
GCA_033100235.1	WUSP082	S. pasteurianus	ICE	88494	1139845..1228338	NA		typeFATA	NA	0		37.43
GCA_033100235.1	WUSP082	S. pasteurianus	ICE	24740	6989..31728	NA	MOBQ	typeFATA	GTCATAGAATAATTCTTTGTTTTCTTCAATCGATTCAATAGAAATAT	3	fexA; optrA; erm(A)	33.74
GCA_050563445.1	205	S. pasteurianus	ICE	26369	1703693..1730061	NA	profile_MOBT,MOBT	typeFA	AACCCCTCGGTATCTAACAGGGGGGTACAAATCGACAGGAAACAGTCAAAAAAACATTAGAAAATCCTTTGGTTACAAGGGATTTACAAAATTTCAGCGTATGTCAAATGGGCTTTAAAAGTTGACATAC	1	tet(M)	38.37
GCA_050563445.1	205	S. pasteurianus	ICE	60811	361187..421997	rplL	MOBP1	typeFATA	NA	0		36.87
GCA_900478025.1	NCTC13784	S. pasteurianus	ICE	38653	1384287..1422939	NA	profile_MOBT	typeFA	NA	0		38.15
GCA_900478025.1	NCTC13784	S. pasteurianus	ICE	17499	373488..390986	rpmH	profile_MOBT	typeFA	ACTTAACCCCCCGTATCTAACAGGGGGGTACAAATCGACAGGAAACAGTCAAAAAAACATTAGAAAATCCTTTGGTTACAAGGGATTTACAAAATTTCAGCGTATGTCAAATGGGCTTTAAAAGTTGACATAC	1	tet(M)	39.11
GCA_003963555.1	KCOM 2412	S. periodonticum	ICE	28408	1216332..1244739	rplL	MOBP1	typeFATA	NA	0		36.29
GCA_003352995.1	14A0014	S. pluranimalium	ICE	58604	798169..856772	NA	firmi_Viral_Rep_B2,MOBP1	typeFATA	NA	0		37.49
GCA_003352995.1	14A0014	S. pluranimalium	ICE	53918	1255699..1309616	rplL	MOBP1	typeFATA	NA	0		38.74
GCA_029625395.1	SP28	S. pluranimalium	ICE	79786	735902..815687	NA	firmi_Rep_2,MOBV	typeFATA	GTAAAGTATAACACACTATACTTTATATTCATAAAGTG	9	tet(O/W/32/O); erm(B); dfrG; lsa(E); lnu(B); ant(6)-Ia; aac(6')-aph(2''); tet(L); cat	37.79
GCA_029625395.1	SP28	S. pluranimalium	ICE	38379	1445670..1484048	rplL	MOBP1	typeFATA	TTGGGGAATATCCCCAAGCCCCTGAG	2	optrA; fexA	40.24
GCA_002357995.1	KK0981	S. pneumoniae	ICE	43045	1075800..1118844	rplL	profile_MOBT,MOBP1	typeFA	GTATGTCAACTTTTAAAGCCCATTTGACATACGCTGAAATTTTGTAAATCCCTTGTAACCAAAGGATTTTCTAATGTTTTTTTGACTGTTTCCTGTCGATTTGTACCCCCCTGTTAGATACGGGGGGTTAAGT	0		35.09
GCA_002357995.1	KK0981	S. pneumoniae	ICE	78670	1040175..1118844	rplL	profile_MOBT,MOBP1	typeFATA	GTATGTCAACTTTTAAAGCCCATTTGACATACGCTGAAATTTTGTAAATCCCTTGTAACCAAAGGATTTTCTAATGTTTTTTTGACTGTTTCCTGTCGATTTGTACCCCCCTGTTAGATACGGGGGGTTAAGT	4	erm(B); mef(A); msr(D); tet(M)	35.5
GCA_002358015.1		S. pneumoniae	ICE	31580	606322..637901	rplL	profile_MOBT	typeFA	GTATGTCAACTTTTAAAGCCCATTTGACATACGCTGAAATTTTGTAAATCCCTTGTAACCAAAGGATTTTCTAATGTTTTTTTGACTGTTTCCTGTCGATTTGTACCCCCCTGTTAGATACGGGGGGTTAAGT	2	erm(B); tet(M)	37.87
GCA_002358015.1		S. pneumoniae	ICE	69167	602053..671219	rplL	profile_MOBT,MOBP1	typeFATA	GTATGTCAACTTTTAAAGCCCATTTGACATACGCTGAAATTTTGTAAATCCCTTGTAACCAAAGGATTTTCTAATGTTTTTTTGACTGTTTCCTGTCGATTTGTACCCCCCTGTTAGATACGGGGGGTTAAGT	1	cat(pC194)	35.76
GCA_002358035.1		S. pneumoniae	ICE	42794	636282..679075	rplL	profile_MOBT,MOBP1	typeFA	GTATGTCAACTTTTAAAGCCCATTTGACATACGCTGAAATTTTGTAAATCCCTTGTAACCAAAGGATTTTCTAATGTTTTTTTGACTGTTTCCTGTCGATTTGTACCCCCCTGTTAGATACGGGGGGTTAAGT	0		35.06
GCA_002358035.1		S. pneumoniae	ICE	78419	600657..679075	rplL	profile_MOBT,MOBP1	typeFATA	GTATGTCAACTTTTAAAGCCCATTTGACATACGCTGAAATTTTGTAAATCCCTTGTAACCAAAGGATTTTCTAATGTTTTTTTGACTGTTTCCTGTCGATTTGTACCCCCCTGTTAGATACGGGGGGTTAAGT	4	erm(B); mef(A); msr(D); tet(M)	35.49
GCA_003609935.1	MDRSPN001	S. pneumoniae	ICE	22614	1713255..1735868	rpmH	profile_MOBT	typeFA	ACTTAACCCCCCGTATCTAACAGGGGGGTACAAATCGACAGGAAACAGTCAAAAAAACATTAGAAAATCCTTTGGTTACAAGGGATTTACAAAATTTCAGCGTATGTCAAATGGGCTTTAAAAGTTGACATAC	2	tet(M); erm(B)	37.96
GCA_003966505.1	HU-OH	S. pneumoniae	ICE	31580	1028032..1059611	rplL	profile_MOBT	typeFA	GTATGTCAACTTTTAAAGCCCATTTGACATACGCTGAAATTTTGTAAATCCCTTGTAACCAAAGGATTTTCTAATGTTTTTTTGACTGTTTCCTGTCGATTTGTACCCCCCTGTTAGATACGGGGGGTTAAGT	2	erm(B); tet(M)	37.88
GCA_003966505.1	HU-OH	S. pneumoniae	ICE	69165	1023763..1092927	rplL	profile_MOBT,MOBP1	typeFATA	GTATGTCAACTTTTAAAGCCCATTTGACATACGCTGAAATTTTGTAAATCCCTTGTAACCAAAGGATTTTCTAATGTTTTTTTGACTGTTTCCTGTCGATTTGTACCCCCCTGTTAGATACGGGGGGTTAAGT	1	cat(pC194)	35.76
GCA_003967155.2	ASP0581	S. pneumoniae	ICE	29498	1063119..1092616	rpmH	profile_MOBT	typeFA	ACTTAACCCCCCGTATCTAACAGGGGGGTACAAATCGACAGGAAACAGTCAAAAAAACATTAGAAAATCCTTTGGTTACAAGGGATTTACAAAATTTCAGCGTATGTCAAATGGGCTTTAAAAGTTGACATAC	2	erm(B); tet(M)	38.25
GCA_003967155.2	ASP0581	S. pneumoniae	ICE	69738	1058850..1128587	rplL	profile_MOBT,MOBP1	typeFATA	ACTTAACCCCCCGTATCTAACAGGGGGGTACAAATCGACAGGAAACAGTCAAAAAAACATTAGAAAATCCTTTGGTTACAAGGGATTTACAAAATTTCAGCGTATGTCAAATGGGCTTTAAAAGTTGACATAC	1	cat(pC194)	35.65
GCA_027943785.1	PZ900700792	S. pneumoniae	ICE	23033	1706719..1729751	plcR	profile_MOBT	typeFA	ACTTAACCCCCCGTATCTAACAGGGGGGTACAAATCGACAGGAAACAGTCAAAAAAACATTAGAAAATCCTTTGGTTACAAGGGATTTACAAAATTTCAGCGTATGTCAAATGGGCTTTAAAAGTTGACATAC	3	tet(M); msr(D); mef(A)	38.51
GCA_027943805.1	PZ900701057	S. pneumoniae	ICE	35867	126043..161909	NA	profile_MOBT	typeFA	TTAACCCCCCGTATCTAACAGGGGGGTACAAATCGACAGGAAACAGTCAAAAAAACATTAGAAAATCCTTTGGTTACAAGGGATTTACAAAATTTCAGCGTATGTCAAATGGGCTTTAAAAGTTGACATAC	2	erm(B); tet(M)	37.14
GCA_027943845.1	PZ900700204	S. pneumoniae	ICE	35867	126045..161911	NA	profile_MOBT	typeFA	TTAACCCCCCGTATCTAACAGGGGGGTACAAATCGACAGGAAACAGTCAAAAAAACATTAGAAAATCCTTTGGTTACAAGGGATTTACAAAATTTCAGCGTATGTCAAATGGGCTTTAAAAGTTGACATAC	2	erm(B); tet(M)	37.14
GCA_033096025.1	PZ900700003	S. pneumoniae	ICE	28128	503372..531499	rplL	profile_MOBT	typeFA	GTATGTCAACTTTTAAAGCCCATTTGACATACGCTGAAATTTTGTAAATCCCTTGTAACCAAAGGATTTTCTAATGTTTTTTTGACTGTTTCCTGTCGATTTGTACCCCCCTGTTAGATACGGGGGGTTAAGT	4	erm(B); mef(A); msr(D); tet(M)	37.67
GCA_033096065.1	PZ900700006	S. pneumoniae	ICE	105563	961392..1066954	rlmD	MOBP1,MOBQ	typeFATA	NA	0		35.43
GCA_033096105.1	PZ900700009	S. pneumoniae	ICE	22612	1466420..1489031	rpmH	profile_MOBT	typeFA	ACTTAACCCCCCGTATCTAACAGGGGGGTACAAATCGACAGGAAACAGTCAAAAAAACATTAGAAAATCCTTTGGTTACAAGGGATTTACAAAATTTCAGCGTATGTCAAATGGGCTTTAAAAGTTGACATAC	2	tet(M); erm(B)	37.96
GCA_033096125.1	PZ900700012	S. pneumoniae	ICE	23034	152737..175770	rpmH	profile_MOBT	typeFA	ACTTAACCCCCCGTATCTAACAGGGGGGTACAAATCGACAGGAAACAGTCAAAAAAACATTAGAAAATCCTTTGGTTACAAGGGATTTACAAAATTTCAGCGTATGTCAAATGGGCTTTAAAAGTTGACATAC	3	tet(M); msr(D); mef(A)	38.44
GCA_033096145.1	PZ900700014	S. pneumoniae	ICE	70254	1088828..1159081	rplL	profile_MOBT,MOBP1	typeFA	GTATGTCAACTTTTAAAGCCCATTTGACATACGCTGAAATTTTGTAAATCCCTTGTAACCAAAGGATTTTCTAATGTTTTTTTGACTGTTTCCTGTCGATTTGTACCCCCCTGTTAGATACGGGGGGTTAAGT	3	mef(A); msr(D); tet(M)	35.17
GCA_033096145.1	PZ900700014	S. pneumoniae	ICE	74522	1084560..1159081	rplL	profile_MOBT,MOBP1	typeFATA	GTATGTCAACTTTTAAAGCCCATTTGACATACGCTGAAATTTTGTAAATCCCTTGTAACCAAAGGATTTTCTAATGTTTTTTTGACTGTTTCCTGTCGATTTGTACCCCCCTGTTAGATACGGGGGGTTAAGT	0		35.08
GCA_033096165.1	PZ900700027	S. pneumoniae	ICE	60346	1088380..1148725	rplL	profile_MOBT,MOBP1	typeFA	GTATGTCAACTTTTAAAGCCCATTTGACATACGCTGAAATTTTGTAAATCCCTTGTAACCAAAGGATTTTCTAATGTTTTTTTGACTGTTTCCTGTCGATTTGTACCCCCCTGTTAGATACGGGGGGTTAAGT	3	mef(A); msr(D); tet(M)	36.48
GCA_033096165.1	PZ900700027	S. pneumoniae	ICE	64615	1084111..1148725	rplL	profile_MOBT,MOBP1	typeFATA	GTATGTCAACTTTTAAAGCCCATTTGACATACGCTGAAATTTTGTAAATCCCTTGTAACCAAAGGATTTTCTAATGTTTTTTTGACTGTTTCCTGTCGATTTGTACCCCCCTGTTAGATACGGGGGGTTAAGT	0		36.29
GCA_033096205.1	PZ900700054	S. pneumoniae	ICE	22612	1713126..1735737	rpmH	profile_MOBT	typeFA	ACTTAACCCCCCGTATCTAACAGGGGGGTACAAATCGACAGGAAACAGTCAAAAAAACATTAGAAAATCCTTTGGTTACAAGGGATTTACAAAATTTCAGCGTATGTCAAATGGGCTTTAAAAGTTGACATAC	2	tet(M); erm(B)	37.99
GCA_033096225.1	PZ900700063	S. pneumoniae	ICE	36988	1058242..1095229	rpmH	profile_MOBT	typeFA	ACTTAACCCCCCGTATCTAACAGGGGGGTACAAATCGACAGGAAACAGTCAAAAAAACATTAGAAAATCCTTTGGTTACAAGGGATTTACAAAATTTCAGCGTATGTCAAATGGGCTTTAAAAGTTGACATAC	4	tet(M); msr(D); mef(A); erm(B)	37.7
GCA_033096225.1	PZ900700063	S. pneumoniae	ICE	78522	1020977..1099498	rpmH	profile_MOBT	typeFATA	ACTTAACCCCCCGTATCTAACAGGGGGGTACAAATCGACAGGAAACAGTCAAAAAAACATTAGAAAATCCTTTGGTTACAAGGGATTTACAAAATTTCAGCGTATGTCAAATGGGCTTTAAAAGTTGACATAC	0		35.77
GCA_033096245.1	PZ900700097	S. pneumoniae	ICE	71645	789990..861634	rplL	MOBP1,profile_MOBT	typeFA	GTATGTCAACTTTTAAAGCCCATTTGACATACGCTGAAATTTTGTAAATCCCTTGTAACCAAAGGATTTTCTAATGTTTTTTTGACTGTTTCCTGTCGATTTGTACCCCCCTGTTAGATACGGGGGGTTAAGT	3	mef(A); msr(D); tet(M)	34.49
GCA_033096245.1	PZ900700097	S. pneumoniae	ICE	72127	789508..861634	rplL	MOBP1,profile_MOBT	typeFATA	GTATGTCAACTTTTAAAGCCCATTTGACATACGCTGAAATTTTGTAAATCCCTTGTAACCAAAGGATTTTCTAATGTTTTTTTGACTGTTTCCTGTCGATTTGTACCCCCCTGTTAGATACGGGGGGTTAAGT	0		34.47
GCA_033096265.1	PZ900700119	S. pneumoniae	ICE	57754	1093901..1151654	rplL	profile_MOBT,MOBP1	typeFA	ACTTAACCCCCCGTATCTAACAGGGGGGTACAAATCGACAGGAAACAGTCAAAAAAACATTAGAAAATCCTTTGGTTACAAGGGATTTACAAAATTTCAGCGTATGTCAAATGGGCTTTAAAAGTTGACATAC	2	erm(B); tet(M)	36.42
GCA_033096265.1	PZ900700119	S. pneumoniae	ICE	62023	1089632..1151654	rplL	profile_MOBT,MOBP1	typeFATA	ACTTAACCCCCCGTATCTAACAGGGGGGTACAAATCGACAGGAAACAGTCAAAAAAACATTAGAAAATCCTTTGGTTACAAGGGATTTACAAAATTTCAGCGTATGTCAAATGGGCTTTAAAAGTTGACATAC	0		36.22
GCA_033096285.1	PZ900700178	S. pneumoniae	ICE	22543	1437674..1460216	rpmH	profile_MOBT	typeFA	ACTTAACCCCCCGTATCTAACAGGGGGGTACAAATCGACAGGAAACAGTCAAAAAAACATTAGAAAATCCTTTGGTTACAAGGGATTTACAAAATTTCAGCGTATGTCAAATGGGCTTTAAAAGTTGACATAC	3	tet(M); msr(D); mef(A)	38.55
GCA_033096305.1	PZ900700406	S. pneumoniae	ICE	17502	1467241..1484742	rpmH	profile_MOBT	typeFA	ACTTAACCCCCCGTATCTAACAGGGGGGTACAAATCGACAGGAAACAGTCAAAAAAACATTAGAAAATCCTTTGGTTACAAGGGATTTACAAAATTTCAGCGTATGTCAAATGGGCTTTAAAAGTTGACATAC	1	tet(M)	38.97
GCA_033096305.1	PZ900700406	S. pneumoniae	ICE	38751	431519..470269	rplL	MOBP1	typeFATA	NA	0		37.71
GCA_033096325.1	PZ900701114	S. pneumoniae	ICE	59419	934658..994076	rplL	profile_MOBT,MOBP1	typeFA	GTATGTCAACTTTTAAAGCCCATTTGACATACGCTGAAATTTTGTAAATCCCTTGTAACCAAAGGATTTTCTAATGTTTTTTTGACTGTTTCCTGTCGATTTGTACCCCCCTGTTAGATACGGGGGGTTAAGT	2	tet(M); erm(B)	35.83
GCA_033096325.1	PZ900701114	S. pneumoniae	ICE	61254	932823..994076	rplL	profile_MOBT,MOBP1	typeFATA	GTATGTCAACTTTTAAAGCCCATTTGACATACGCTGAAATTTTGTAAATCCCTTGTAACCAAAGGATTTTCTAATGTTTTTTTGACTGTTTCCTGTCGATTTGTACCCCCCTGTTAGATACGGGGGGTTAAGT	0		35.75
GCA_033096365.1	PZ900701541	S. pneumoniae	ICE	59965	1000296..1060260	rplL	MOBP1,profile_MOBT	typeFA	ACTTAACCCCCCGTATCTAACAGGGGGGTACAAATCGACAGGAAACAGTCAAAAAAACATTAGAAAATCCTTTGGTTACAAGGGATTTACAAAATTTCAGCGTATGTCAAATGGGCTTTAAAAGTTGACATAC	2	tet(M); erm(B)	36.2
GCA_033096365.1	PZ900701541	S. pneumoniae	ICE	64234	1000296..1064529	rplL	MOBP1,profile_MOBT	typeFATA	ACTTAACCCCCCGTATCTAACAGGGGGGTACAAATCGACAGGAAACAGTCAAAAAAACATTAGAAAATCCTTTGGTTACAAGGGATTTACAAAATTTCAGCGTATGTCAAATGGGCTTTAAAAGTTGACATAC	0		36.03
GCA_033096385.1	PZ900701549	S. pneumoniae	ICE	57645	1060501..1118145	rplL	profile_MOBT,MOBP1	typeFA	ACTTAACCCCCCGTATCTAACAGGGGGGTACAAATCGACAGGAAACAGTCAAAAAAACATTAGAAAATCCTTTGGTTACAAGGGATTTACAAAATTTCAGCGTATGTCAAATGGGCTTTAAAAGTTGACATAC	2	erm(B); tet(M)	36.38
GCA_033096385.1	PZ900701549	S. pneumoniae	ICE	61914	1056232..1118145	rplL	profile_MOBT,MOBP1	typeFATA	ACTTAACCCCCCGTATCTAACAGGGGGGTACAAATCGACAGGAAACAGTCAAAAAAACATTAGAAAATCCTTTGGTTACAAGGGATTTACAAAATTTCAGCGTATGTCAAATGGGCTTTAAAAGTTGACATAC	0		36.19
GCA_036322935.1	PF2	S. pneumoniae	ICE	23033	1709038..1732070	plcR	profile_MOBT	typeFA	ACTTAACCCCCCGTATCTAACAGGGGGGTACAAATCGACAGGAAACAGTCAAAAAAACATTAGAAAATCCTTTGGTTACAAGGGATTTACAAAATTTCAGCGTATGTCAAATGGGCTTTAAAAGTTGACATAC	3	tet(M); msr(D); mef(A)	38.51
GCA_036322955.1	Pne2	S. pneumoniae	ICE	22612	1570449..1593060	rpmH	profile_MOBT	typeFA	ACTTAACCCCCCGTATCTAACAGGGGGGTACAAATCGACAGGAAACAGTCAAAAAAACATTAGAAAATCCTTTGGTTACAAGGGATTTACAAAATTTCAGCGTATGTCAAATGGGCTTTAAAAGTTGACATAC	2	tet(M); erm(B)	37.97
GCA_036322975.1	Pne3	S. pneumoniae	ICE	22612	1570412..1593023	rpmH	profile_MOBT	typeFA	ACTTAACCCCCCGTATCTAACAGGGGGGTACAAATCGACAGGAAACAGTCAAAAAAACATTAGAAAATCCTTTGGTTACAAGGGATTTACAAAATTTCAGCGTATGTCAAATGGGCTTTAAAAGTTGACATAC	2	tet(M); erm(B)	37.97
GCA_036323015.1	1-Sep	S. pneumoniae	ICE	59965	998569..1058533	rplL	MOBP1,profile_MOBT	typeFA	ACTTAACCCCCCGTATCTAACAGGGGGGTACAAATCGACAGGAAACAGTCAAAAAAACATTAGAAAATCCTTTGGTTACAAGGGATTTACAAAATTTCAGCGTATGTCAAATGGGCTTTAAAAGTTGACATAC	2	tet(M); erm(B)	36.21
GCA_036323015.1	1-Sep	S. pneumoniae	ICE	64234	998569..1062802	rplL	MOBP1,profile_MOBT	typeFATA	ACTTAACCCCCCGTATCTAACAGGGGGGTACAAATCGACAGGAAACAGTCAAAAAAACATTAGAAAATCCTTTGGTTACAAGGGATTTACAAAATTTCAGCGTATGTCAAATGGGCTTTAAAAGTTGACATAC	0		36.04
GCA_036323035.1	2-Sep	S. pneumoniae	ICE	23036	1545740..1568775	rpmH	profile_MOBT	typeFA	ACTTAACCCCCCGTATCTAACAGGGGGGTACAAATCGACAGGAAACAGTCAAAAAAACATTAGAAAATCCTTTGGTTACAAGGGATTTACAAAATTTCAGCGTATGTCAAATGGGCTTTAAAAGTTGACATAC	3	tet(M); msr(D); mef(A)	38.49
GCA_036323075.1	4-Sep	S. pneumoniae	ICE	59515	957392..1016906	rplL	MOBP1	typeFA	NA	2	erm(B); tet(M)	35.21
GCA_036323075.1	4-Sep	S. pneumoniae	ICE	66370	950537..1016906	rplL	MOBP1	typeFATA	NA	0		35.13
GCA_036509575.1	6-Sep	S. pneumoniae	ICE	32609	1095411..1128019	rplL	profile_MOBT	typeFA	GTATGTCAACTTTTAAAGCCCATTTGACATACGCTGAAATTTTGTAAATCCCTTGTAACCAAAGGATTTTCTAATGTTTTTTTGACTGTTTCCTGTCGATTTGTACCCCCCTGTTAGATACGGGGGGTTAAGT	3	mef(A); msr(D); tet(M)	38.19
GCA_036509575.1	6-Sep	S. pneumoniae	ICE	65767	1091142..1156908	rplL	profile_MOBT,MOBP1	typeFATA	GTATGTCAACTTTTAAAGCCCATTTGACATACGCTGAAATTTTGTAAATCCCTTGTAACCAAAGGATTTTCTAATGTTTTTTTGACTGTTTCCTGTCGATTTGTACCCCCCTGTTAGATACGGGGGGTTAAGT	0		36.36
GCA_041154395.1	16P28	S. pneumoniae	ICE	57753	1090834..1148586	rplL	profile_MOBT,MOBP1	typeFA	ACTTAACCCCCCGTATCTAACAGGGGGGTACAAATCGACAGGAAACAGTCAAAAAAACATTAGAAAATCCTTTGGTTACAAGGGATTTACAAAATTTCAGCGTATGTCAAATGGGCTTTAAAAGTTGACATAC	2	erm(B); tet(M)	36.42
GCA_041154395.1	16P28	S. pneumoniae	ICE	62022	1086565..1148586	rplL	profile_MOBT,MOBP1	typeFATA	ACTTAACCCCCCGTATCTAACAGGGGGGTACAAATCGACAGGAAACAGTCAAAAAAACATTAGAAAATCCTTTGGTTACAAGGGATTTACAAAATTTCAGCGTATGTCAAATGGGCTTTAAAAGTTGACATAC	0		36.23
GCA_041154405.1	16P29	S. pneumoniae	ICE	57753	1092256..1150008	rplL	profile_MOBT,MOBP1	typeFA	ACTTAACCCCCCGTATCTAACAGGGGGGTACAAATCGACAGGAAACAGTCAAAAAAACATTAGAAAATCCTTTGGTTACAAGGGATTTACAAAATTTCAGCGTATGTCAAATGGGCTTTAAAAGTTGACATAC	2	erm(B); tet(M)	36.42
GCA_041154405.1	16P29	S. pneumoniae	ICE	62022	1087987..1150008	rplL	profile_MOBT,MOBP1	typeFATA	ACTTAACCCCCCGTATCTAACAGGGGGGTACAAATCGACAGGAAACAGTCAAAAAAACATTAGAAAATCCTTTGGTTACAAGGGATTTACAAAATTTCAGCGTATGTCAAATGGGCTTTAAAAGTTGACATAC	0		36.23
GCA_000019005.1	P1031	S. pneumoniae	ICE	80026	1042034..1122059	rplL	profile_MOBT,MOBP1	typeFA	GTATGTCAACTTTTAAAGCCCATTTGACATACGCTGAAATTTTGTAAATCCCTTGTAACCAAAGGATTTTCTAATGTTTTTTTGACTGTTTCCTGTCGATTTGTACCCCCCTGTTAGATACGGGGGGTTAAGT	1	tet(M)	36.86
GCA_000019005.1	P1031	S. pneumoniae	ICE	80026	1042034..1122059	rplL	profile_MOBT,MOBP1	typeFATA	GTATGTCAACTTTTAAAGCCCATTTGACATACGCTGAAATTTTGTAAATCCCTTGTAACCAAAGGATTTTCTAATGTTTTTTTGACTGTTTCCTGTCGATTTGTACCCCCCTGTTAGATACGGGGGGTTAAGT	0		36.86
GCA_000019025.1	Taiwan19F-14	S. pneumoniae	ICE	23033	1785495..1808527	plcR	profile_MOBT	typeFA	ACTTAACCCCCCGTATCTAACAGGGGGGTACAAATCGACAGGAAACAGTCAAAAAAACATTAGAAAATCCTTTGGTTACAAGGGATTTACAAAATTTCAGCGTATGTCAAATGGGCTTTAAAAGTTGACATAC	3	tet(M); msr(D); mef(A)	38.52
GCA_000019265.1	Hungary19A-6	S. pneumoniae	ICE	20376	1302208..1322583	rplL	profile_MOBT	typeFA	GTATGTCAACTTTTAAAGCCCATTTGACATACGCTGAAATTTTGTAAATCCCTTGTAACCAAAGGATTTTCTAATGTTTTTTTGACTGTTTCCTGTCGATTTGTACCCCCCTGTTAGATACGGGGGGTTAAGT	2	tet(M); erm(B)	38.48
GCA_000019825.1	G54	S. pneumoniae	ICE	53561	1194712..1248272	rplL	profile_MOBT,MOBP1	typeFA	GTATGTCAACTTTTAAAGCCCATTTGACATACGCTGAAATTTTGTAAATCCCTTGTAACCAAAGGATTTTCTAATGTTTTTTTGACTGTTTCCTGTCGATTTGTACCCCCCTGTTAGATACGGGGGGTTAAGT	1	erm(B)	35.19
GCA_000019825.1	G54	S. pneumoniae	ICE	64979	1191352..1256330	rplL	profile_MOBT,MOBP1	typeFATA	GTATGTCAACTTTTAAAGCCCATTTGACATACGCTGAAATTTTGTAAATCCCTTGTAACCAAAGGATTTTCTAATGTTTTTTTGACTGTTTCCTGTCGATTTGTACCCCCCTGTTAGATACGGGGGGTTAAGT	1	tet(M)	35.12
GCA_000019985.1	CGSP14	S. pneumoniae	ICE	22616	159929..182544	rpmH	profile_MOBT	typeFA	ACTTAACCCCCCGTATCTAACAGGGGGGTACAAATCGACAGGAAACAGTCAAAAAAACATTAGAAAATCCTTTGGTTACAAGGGATTTACAAAATTTCAGCGTATGTCAAATGGGCTTTAAAAGTTGACATAC	2	tet(M); erm(B)	37.96
GCA_000019985.1	CGSP14	S. pneumoniae	ICE	40609	1284144..1324752	rpmH	profile_MOBT	typeFATA	ACTTAACCCCCCGTATCTAACAGGGGGGTACAAATCGACAGGAAACAGTCAAAAAAACATTAGAAAATCCTTTGGTTACAAGGGATTTACAAAATTTCAGCGTATGTCAAATGGGCTTTAAAAGTTGACATAC	2	erm(B); aph(3')-III	36.37
GCA_000196595.1	TCH8431/19A	S. pneumoniae	ICE	25882	2005333..2031214	ftsE	profile_MOBT	typeFA	ACTTAACCCCCCGTATCTAACAGGGGGGTACAAATCGACAGGAAACAGTCAAAAAAACATTAGAAAATCCTTTGGTTACAAGGGATTTACAAAATTTCAGCGTATGTCAAATGGGCTTTAAAAGTTGACATAC	4	erm(B); tet(M); msr(D); mef(A)	38.06
GCA_000146975.1	AP200	S. pneumoniae	ICE	54175	820853..875027	rplL	MOBP1	typeFATA	NA	1	erm(A)	31.29
GCA_000147095.1	670-6B	S. pneumoniae	ICE	66387	1070507..1136893	NA	profile_MOBT	typeFA	GTATGTCAACTTTTAAAGCCCATTTGACATACGCTGAAATTTTGTAAATCCCTTGTAACCAAAGGATTTTCTAATGTTTTTTTGACTGTTTCCTGTCGATTTGTACCCCCCTGTTAGATACGGGGGGGTAAGT	2	tet(M); erm(B)	37.34
GCA_000147095.1	670-6B	S. pneumoniae	ICE	102230	1034664..1136893	NA	MOBP1,profile_MOBT	typeFATA	GTATGTCAACTTTTAAAGCCCATTTGACATACGCTGAAATTTTGTAAATCCCTTGTAACCAAAGGATTTTCTAATGTTTTTTTGACTGTTTCCTGTCGATTTGTACCCCCCTGTTAGATACGGGGGGGTAAGT	1	cat(pC194)	35.56
GCA_000251085.2	ST556	S. pneumoniae	ICE	23033	1823684..1846716	plcR	profile_MOBT	typeFA	ACTTAACCCCCCGTATCTAACAGGGGGGTACAAATCGACAGGAAACAGTCAAAAAAACATTAGAAAATCCTTTGGTTACAAGGGATTTACAAAATTTCAGCGTATGTCAAATGGGCTTTAAAAGTTGACATAC	3	tet(M); msr(D); mef(A)	38.51
GCA_000494795.1		S. pneumoniae	ICE	25882	1743646..1769527	ftsE		typeFA	ACTTAACCCCCCGTATCTAACAGGGGGGTACAAATCGACAGGAAACAGTCAAAAAAACATTAGAAAATCCTTTGGTTACAAGGGATTTACAAAATTTCAGCGTATGTCAAATGGGCTTTAAAAGTTGACATAC	4	erm(B); tet(M); msr(D); mef(A)	38.06
GCA_000817005.1	NT_110_58	S. pneumoniae	ICE	28434	1346883..1375316	NA	MOBP1	typeFATA	NA	0		NA
GCA_000817005.1	NT_110_58	S. pneumoniae	ICE	75408	956676..1032083	tRNA-Arg	profile_MOBT,MOBP1	typeFA	NA	0		NA
GCA_000817005.1	NT_110_58	S. pneumoniae	ICE	74872	607082..681953	rplL	MOBP1	typeFATA	NA	0		42.16
GCA_000817005.1	NT_110_58	S. pneumoniae	ICE	77443	954641..1032083	tRNA-Arg	profile_MOBT,MOBP1	typeFATA	NA	0		NA
GCA_001896065.1	SP61	S. pneumoniae	ICE	25882	1742157..1768038	ftsE	profile_MOBT	typeFA	ACTTAACCCCCCGTATCTAACAGGGGGGTACAAATCGACAGGAAACAGTCAAAAAAACATTAGAAAATCCTTTGGTTACAAGGGATTTACAAAATTTCAGCGTATGTCAAATGGGCTTTAAAAGTTGACATAC	4	erm(B); tet(M); msr(D); mef(A)	38.06
GCA_001896085.1	SP64	S. pneumoniae	ICE	25824	1742518..1768341	rpmH	profile_MOBT	typeFA	ACTTAACCCCCCGTATCTAACAGGGGGGTACAAATCGACAGGAAACAGTCAAAAAAACATTAGAAAATCCTTTGGTTACAAGGGATTTACAAAATTTCAGCGTATGTCAAATGGGCTTTAAAAGTTGACATAC	4	erm(B); tet(M); msr(D); mef(A)	38.07
GCA_002813955.1	11A	S. pneumoniae	ICE	25599	718897..744495	rpmH	profile_MOBT	typeFA	ACTTAACCCCCCGTATCTAACAGGGGGGTACAAATCGACAGGAAACAGTCAAAAAAACATTAGAAAATCCTTTGGTTACAAGGGATTTACAAAATTTCAGCGTATGTCAAATGGGCTTTAAAAGTTGACATAC	2	erm(B); tet(M)	37.58
GCA_003994915.1	HKU1-14	S. pneumoniae	ICE	90454	768206..858659	rplL	profile_MOBT,MOBP1	typeFA	ACTTAACCCCCCGTATCTAACAGGGGGGTACAAATCGACAGGAAACAGTCAAAAAAACATTAGAAAATCCTTTGGTTACAAGGGATTTACAAAATTTCAGCGTATGTCAAATGGGCTTTAAAAGTTGACATAC	2	erm(B); tet(M)	32.74
GCA_003994915.1	HKU1-14	S. pneumoniae	ICE	91663	766997..858659	rplL	profile_MOBT,MOBP1	typeFATA	ACTTAACCCCCCGTATCTAACAGGGGGGTACAAATCGACAGGAAACAGTCAAAAAAACATTAGAAAATCCTTTGGTTACAAGGGATTTACAAAATTTCAGCGTATGTCAAATGGGCTTTAAAAGTTGACATAC	0		32.73
GCA_002076835.1		S. pneumoniae	ICE	20695	1240869..1261563	rplL	profile_MOBT	typeFA	GTATGTCAACTTTTAAAGCCCATTTGACATACGCTGAAATTTTGTAAATCCCTTGTAACCAAAGGATTTTCTAATGTTTTTTTGACTGTTTCCTGTCGATTTGTACCCCCCTGTTAGATACGGGGGGTTAAGT	1	erm(B)	37.89
GCA_002076855.1		S. pneumoniae	ICE	20375	1259730..1280104	rplL	profile_MOBT	typeFA	GTATGTCAACTTTTAAAGCCCATTTGACATACGCTGAAATTTTGTAAATCCCTTGTAACCAAAGGATTTTCTAATGTTTTTTTGACTGTTTCCTGTCGATTTGTACCCCCCTGTTAGATACGGGGGGTTAAGT	2	tet(M); erm(B)	38.48
GCA_003354825.1	SPN XDR SMC1710-32	S. pneumoniae	ICE	25597	1159658..1185254	rplL	profile_MOBT	typeFA	ACTTAACCCCCGTATCTAACAGGGGGGTACAAATCGACAGGAAACAGTCAAAAAAACATTAGAAAATCCTTTGGTTACAAGGGATTTACAAAATTTCAGCGTATGTCAAATGGGCTTTAAAAGTTGACATAC	2	erm(B); tet(M)	37.57
GCA_002947575.1	335	S. pneumoniae	ICE	20056	1258170..1278225	rpmH	profile_MOBT	typeFA	ACTTAACCCCCCGTATCTAACAGGGGGGTACAAATCGACAGGAAACAGTCAAAAAAACATTAGAAAATCCTTTGGTTACAAGGGATTTACAAAATTTCAGCGTATGTCAAATGGGCTTTAAAAGTTGACATAC	0		38.53
GCA_002947575.1	335	S. pneumoniae	ICE	53993	1232217..1286209	rpmH	profile_MOBT	typeFATA	ACTTAACCCCCCGTATCTAACAGGGGGGTACAAATCGACAGGAAACAGTCAAAAAAACATTAGAAAATCCTTTGGTTACAAGGGATTTACAAAATTTCAGCGTATGTCAAATGGGCTTTAAAAGTTGACATAC	1	tet(M)	36.23
GCA_022068245.1	TVO_Taiwan19F-14	S. pneumoniae	ICE	23033	1785332..1808364	plcR	profile_MOBT	typeFA	ACTTAACCCCCCGTATCTAACAGGGGGGTACAAATCGACAGGAAACAGTCAAAAAAACATTAGAAAATCCTTTGGTTACAAGGGATTTACAAAATTTCAGCGTATGTCAAATGGGCTTTAAAAGTTGACATAC	3	tet(M); msr(D); mef(A)	38.52
GCA_015838875.1	310	S. pneumoniae	ICE	93799	1095281..1189079	rplL	MOBP1,MOBQ,profile_MOBT	typeFA	ACTTAACCCCCCGTATCTAACAGGGGGGTACAAATCGACAGGAAACAGTCAAAAAAACATTAGAAAATCCTTTGGTTACAAGGGATTTACAAAATTTCAGCGTATGTCAAATGGGCTTTAAAAGTTGACATAC	2	erm(B); tet(M)	34.32
GCA_015838875.1	310	S. pneumoniae	ICE	95634	1095281..1190914	rplL	MOBP1,MOBQ,profile_MOBT	typeFATA	ACTTAACCCCCCGTATCTAACAGGGGGGTACAAATCGACAGGAAACAGTCAAAAAAACATTAGAAAATCCTTTGGTTACAAGGGATTTACAAAATTTCAGCGTATGTCAAATGGGCTTTAAAAGTTGACATAC	0		34.3
GCA_015839035.1	475	S. pneumoniae	ICE	92387	1143404..1235790	rplL	MOBP1,MOBQ,profile_MOBT	typeFA	ACTTAACCCCCCGTATCTAACAGGGGGGTACAAATCGACAGGAAACAGTCAAAAAAACATTAGAAAATCCTTTGGTTACAAGGGATTTACAAAATTTCAGCGTATGTCAAATGGGCTTTAAAAGTTGACATAC	2	erm(B); tet(M)	34.26
GCA_015839035.1	475	S. pneumoniae	ICE	94222	1143404..1237625	rplL	MOBP1,MOBQ,profile_MOBT	typeFATA	ACTTAACCCCCCGTATCTAACAGGGGGGTACAAATCGACAGGAAACAGTCAAAAAAACATTAGAAAATCCTTTGGTTACAAGGGATTTACAAAATTTCAGCGTATGTCAAATGGGCTTTAAAAGTTGACATAC	0		34.24
GCA_015839235.1	521	S. pneumoniae	ICE	92387	1104559..1196945	rplL	MOBP1,MOBQ,profile_MOBT	typeFA	ACTTAACCCCCCGTATCTAACAGGGGGGTACAAATCGACAGGAAACAGTCAAAAAAACATTAGAAAATCCTTTGGTTACAAGGGATTTACAAAATTTCAGCGTATGTCAAATGGGCTTTAAAAGTTGACATAC	2	erm(B); tet(M)	34.26
GCA_015839235.1	521	S. pneumoniae	ICE	94222	1104559..1198780	rplL	MOBP1,MOBQ,profile_MOBT	typeFATA	ACTTAACCCCCCGTATCTAACAGGGGGGTACAAATCGACAGGAAACAGTCAAAAAAACATTAGAAAATCCTTTGGTTACAAGGGATTTACAAAATTTCAGCGTATGTCAAATGGGCTTTAAAAGTTGACATAC	0		34.24
GCA_015839415.1	525	S. pneumoniae	ICE	50443	504211..554653	rpmH	profile_MOBT	typeFA	ACTTAACCCCCCGTATCTAACAGGGGGGTACAAATCGACAGGAAACAGTCAAAAAAACATTAGAAAATCCTTTGGTTACAAGGGATTTACAAAATTTCAGCGTATGTCAAATGGGCTTTAAAAGTTGACATAC	2	erm(B); tet(M)	36.13
GCA_015839415.1	525	S. pneumoniae	ICE	52278	504211..556488	rpmH	profile_MOBT	typeFATA	ACTTAACCCCCCGTATCTAACAGGGGGGTACAAATCGACAGGAAACAGTCAAAAAAACATTAGAAAATCCTTTGGTTACAAGGGATTTACAAAATTTCAGCGTATGTCAAATGGGCTTTAAAAGTTGACATAC	0		36.03
GCA_015839575.1	566	S. pneumoniae	ICE	95221	928579..1023799	rplL	profile_MOBT,MOBP1,MOBQ	typeFA	GTATGTCAACTTTTAAAGCCCATTTGACATACGCTGAAATTTTGTAAATCCCTTGTAACCAAAGGATTTTCTAATGTTTTTTTGACTGTTTCCTGTCGATTTGTACCCCCCTGTTAGATACGGGGGGTTAAGT	2	tet(M); erm(B)	34.36
GCA_015839575.1	566	S. pneumoniae	ICE	97056	926744..1023799	rplL	profile_MOBT,MOBP1,MOBQ	typeFATA	GTATGTCAACTTTTAAAGCCCATTTGACATACGCTGAAATTTTGTAAATCCCTTGTAACCAAAGGATTTTCTAATGTTTTTTTGACTGTTTCCTGTCGATTTGTACCCCCCTGTTAGATACGGGGGGTTAAGT	0		34.34
GCA_015839775.1	573	S. pneumoniae	ICE	93798	934521..1028318	rplL	profile_MOBT,MOBP1,MOBQ	typeFA	GTATGTCAACTTTTAAAGCCCATTTGACATACGCTGAAATTTTGTAAATCCCTTGTAACCAAAGGATTTTCTAATGTTTTTTTGACTGTTTCCTGTCGATTTGTACCCCCCTGTTAGATACGGGGGGTTAAGT	2	tet(M); erm(B)	34.32
GCA_015839775.1	573	S. pneumoniae	ICE	95633	932686..1028318	rplL	profile_MOBT,MOBP1,MOBQ	typeFATA	GTATGTCAACTTTTAAAGCCCATTTGACATACGCTGAAATTTTGTAAATCCCTTGTAACCAAAGGATTTTCTAATGTTTTTTTGACTGTTTCCTGTCGATTTGTACCCCCCTGTTAGATACGGGGGGTTAAGT	0		34.31
GCA_015839915.1	574	S. pneumoniae	ICE	60842	928497..989338	rplL	profile_MOBT,MOBP1	typeFA	GTATGTCAACTTTTAAAGCCCATTTGACATACGCTGAAATTTTGTAAATCCCTTGTAACCAAAGGATTTTCTAATGTTTTTTTGACTGTTTCCTGTCGATTTGTACCCCCCTGTTAGATACGGGGGGTTAAGT	2	tet(M); erm(B)	35.85
GCA_015839915.1	574	S. pneumoniae	ICE	62677	926662..989338	rplL	profile_MOBT,MOBP1	typeFATA	GTATGTCAACTTTTAAAGCCCATTTGACATACGCTGAAATTTTGTAAATCCCTTGTAACCAAAGGATTTTCTAATGTTTTTTTGACTGTTTCCTGTCGATTTGTACCCCCCTGTTAGATACGGGGGGTTAAGT	0		35.77
GCA_015840115.1	563	S. pneumoniae	ICE	92385	943598..1035982	rplL	profile_MOBT,MOBP1,MOBQ	typeFA	GTATGTCAACTTTTAAAGCCCATTTGACATACGCTGAAATTTTGTAAATCCCTTGTAACCAAAGGATTTTCTAATGTTTTTTTGACTGTTTCCTGTCGATTTGTACCCCCCTGTTAGATACGGGGGGTTAAGT	2	tet(M); erm(B)	34.26
GCA_015840115.1	563	S. pneumoniae	ICE	94220	941763..1035982	rplL	profile_MOBT,MOBP1,MOBQ	typeFATA	GTATGTCAACTTTTAAAGCCCATTTGACATACGCTGAAATTTTGTAAATCCCTTGTAACCAAAGGATTTTCTAATGTTTTTTTGACTGTTTCCTGTCGATTTGTACCCCCCTGTTAGATACGGGGGGTTAAGT	0		34.24
GCA_011694695.1	PZ900701590	S. pneumoniae	ICE	81884	1042420..1124303	NA	profile_MOBT,MOBP1	typeFA	ACTTAACCCCCCGTATCTAACAGGGGGGTACAAATCGACAGGAAACAGTCAAAAAAACATTAGAAAATCCTTTGGTTACAAGGGATTTACAAAATTTCAGCGTATGTCAAATGGGCTTTAAAAGTTGACATAC	2	erm(B); tet(M)	37.1
GCA_011694695.1	PZ900701590	S. pneumoniae	ICE	81884	1042420..1124303	rplL	profile_MOBT,MOBP1	typeFATA	ACTTAACCCCCCGTATCTAACAGGGGGGTACAAATCGACAGGAAACAGTCAAAAAAACATTAGAAAATCCTTTGGTTACAAGGGATTTACAAAATTTCAGCGTATGTCAAATGGGCTTTAAAAGTTGACATAC	0		37.1
GCA_022558605.1	PZ900700608	S. pneumoniae	ICE	59728	1623094..1682821	rplL	MOBP1	typeFA	GTATGTCAACTTTTAAAGCCCATTTGACATACGCTGAAATTTTGTAAATCCCTTGTAACCAAAGGATTTTCTAATGTTTTTTTGACTGTTTCCTGTCGATTTGTACCCCCCTGTTAGATACGGGGGGTTAAGT	0		36.72
GCA_022558605.1	PZ900700608	S. pneumoniae	ICE	60930	1623094..1684023	rplL	MOBP1	typeFATA	GTATGTCAACTTTTAAAGCCCATTTGACATACGCTGAAATTTTGTAAATCCCTTGTAACCAAAGGATTTTCTAATGTTTTTTTGACTGTTTCCTGTCGATTTGTACCCCCCTGTTAGATACGGGGGGTTAAGT	2	erm(B); tet(M)	36.73
GCA_025136435.1	19A-ST320_99-176	S. pneumoniae	ICE	25882	1763352..1789233	ftsE	profile_MOBT	typeFA	ACTTAACCCCCCGTATCTAACAGGGGGGTACAAATCGACAGGAAACAGTCAAAAAAACATTAGAAAATCCTTTGGTTACAAGGGATTTACAAAATTTCAGCGTATGTCAAATGGGCTTTAAAAGTTGACATAC	4	erm(B); tet(M); msr(D); mef(A)	38.06
GCA_017569245.1	BVJ1JL	S. pneumoniae	ICE	26489	959643..986131	rplL	profile_MOBT	typeFA	GTATGTCAACTTTTAAAGCCCATTTGACATACGCTGAAATTTTGTAAATCCCTTGTAACCAAAGGATTTTCTAATGTTTTTTTGACTGTTTCCTGTCGATTTGTACCCCCCTGTTAGATACGGGGGGTTAAGT	1	tet(M)	38.65
GCA_017569245.1	BVJ1JL	S. pneumoniae	ICE	66971	956877..1023847	rplL	profile_MOBT,MOBP1	typeFATA	GTATGTCAACTTTTAAAGCCCATTTGACATACGCTGAAATTTTGTAAATCCCTTGTAACCAAAGGATTTTCTAATGTTTTTTTGACTGTTTCCTGTCGATTTGTACCCCCCTGTTAGATACGGGGGGTTAAGT	1	cat(pC194)	35.4
GCA_021398235.1	19A-19087	S. pneumoniae	ICE	25882	1788911..1814792	ftsE	profile_MOBT	typeFA	ACTTAACCCCCCGTATCTAACAGGGGGGTACAAATCGACAGGAAACAGTCAAAAAAACATTAGAAAATCCTTTGGTTACAAGGGATTTACAAAATTTCAGCGTATGTCAAATGGGCTTTAAAAGTTGACATAC	4	erm(B); tet(M); msr(D); mef(A)	38.06
GCA_021398285.1	19A-19339	S. pneumoniae	ICE	25882	1825622..1851503	ftsE	profile_MOBT	typeFA	ACTTAACCCCCCGTATCTAACAGGGGGGTACAAATCGACAGGAAACAGTCAAAAAAACATTAGAAAATCCTTTGGTTACAAGGGATTTACAAAATTTCAGCGTATGTCAAATGGGCTTTAAAAGTTGACATAC	4	erm(B); tet(M); msr(D); mef(A)	38.06
GCA_021398265.1	19A-19343	S. pneumoniae	ICE	25882	1825622..1851503	ftsE	profile_MOBT	typeFA	ACTTAACCCCCCGTATCTAACAGGGGGGTACAAATCGACAGGAAACAGTCAAAAAAACATTAGAAAATCCTTTGGTTACAAGGGATTTACAAAATTTCAGCGTATGTCAAATGGGCTTTAAAAGTTGACATAC	4	erm(B); tet(M); msr(D); mef(A)	38.06
GCA_022318405.1	CH2241	S. pneumoniae	ICE	88797	1006408..1095204	rplL	MOBP1	typeFATA	ACTTAACCCCCCGTATCTAACAGGGGGGTACAAATCGACAGGAAACAGTCAAAAAAACATTAGAAAATCCTTTGGTTACAAGGGATTTACAAAATTTCAGCGTATGTAAAATGGGCTTTAAAAGTTGACATAC	2	erm(B); tet(M)	36.46
GCA_022318465.1	ND6401	S. pneumoniae	ICE	88797	1007172..1095968	rplL	MOBP1	typeFATA	ACTTAACCCCCCGTATCTAACAGGGGGGTACAAATCGACAGGAAACAGTCAAAAAAACATTAGAAAATCCTTTGGTTACAAGGGATTTACAAAATTTCAGCGTATGTAAAATGGGCTTTAAAAGTTGACATAC	2	erm(B); tet(M)	36.45
GCA_022318485.1	NP7513	S. pneumoniae	ICE	88204	1521034..1609237	rplL	MOBP1	typeFATA	ACTTAACCCCCCGTATCTAACAGGGGGGTACAAATCGACAGGAAACAGTCAAAAAAACATTAGAAAATCCTTTGGTTACAAGGGATTTACAAAATTTCAGCGTATGTCAAATGGGCTTTAAAAGTTGACATAC	2	tet(M); erm(B)	36.53
GCA_022318505.1	NP7536	S. pneumoniae	ICE	88797	1008027..1096823	rplL	MOBP1	typeFATA	ACTTAACCCCCCGTATCTAACAGGGGGGTACAAATCGACAGGAAACAGTCAAAAAAACATTAGAAAATCCTTTGGTTACAAGGGATTTACAAAATTTCAGCGTATGTAAAATGGGCTTTAAAAGTTGACATAC	2	erm(B); tet(M)	36.45
GCA_022318525.1	PT8465	S. pneumoniae	ICE	48820	890797..939616	rplL	MOBP1	typeFATA	NA	1	tet(32)	38.66
GCA_025643315.1	3641/15	S. pneumoniae	ICE	25840	1740003..1765842	rpmH	profile_MOBT	typeFA	ACTTAACCCCCCGTATCTAACAGGGGGGTACAAATCGACAGGAAACAGTCAAAAAAACATTAGAAAATCCTTTGGTTACAAGGGATTTACAAAATTTCAGCGTATGTCAAATGGGCTTTAAAAGTTGACATAC	4	erm(B); tet(M); msr(D); mef(A)	38.07
GCA_025643295.1	Sep-38	S. pneumoniae	ICE	25882	1773857..1799738	ftsE	profile_MOBT	typeFA	ACTTAACCCCCCGTATCTAACAGGGGGGTACAAATCGACAGGAAACAGTCAAAAAAACATTAGAAAATCCTTTGGTTACAAGGGATTTACAAAATTTCAGCGTATGTCAAATGGGCTTTAAAAGTTGACATAC	4	erm(B); tet(M); msr(D); mef(A)	38.06
GCA_027563115.1	SP007	S. pneumoniae	ICE	25882	1758823..1784704	ftsE	profile_MOBT	typeFA	ACTTAACCCCCCGTATCTAACAGGGGGGTACAAATCGACAGGAAACAGTCAAAAAAACATTAGAAAATCCTTTGGTTACAAGGGATTTACAAAATTTCAGCGTATGTCAAATGGGCTTTAAAAGTTGACATAC	4	erm(B); tet(M); msr(D); mef(A)	38.06
GCA_030127445.1	BM6001	S. pneumoniae	ICE	27098	1133585..1160682	rplL	profile_MOBT	typeFA	GTATGTCAACTTTTAAAGCCCATTTGACATACGCTGAAATTTTGTAAATCCCTTGTAACCAAAGGATTTTCTAATGTTTTTTTGACTGTTTCCTGTCGATTTGTACCCCCCTGTTAGATACGGGGGGTTAAGT	1	tet(M)	38.53
GCA_030127445.1	BM6001	S. pneumoniae	ICE	66761	1129313..1196073	rplL	profile_MOBT,MOBP1	typeFATA	GTATGTCAACTTTTAAAGCCCATTTGACATACGCTGAAATTTTGTAAATCCCTTGTAACCAAAGGATTTTCTAATGTTTTTTTGACTGTTTCCTGTCGATTTGTACCCCCCTGTTAGATACGGGGGGTTAAGT	0		35.66
GCA_026625945.1	NP1	S. pneumoniae	ICE	25126	1367898..1393023	rplL	profile_MOBT,MOBP1	typeFA	GTATGTCAACTTTTAAAGCCCATTTGACATACGCTGAAATTTTGTAAATCCCTTGTAACCAAAGGATTTTCTAATGTTTTTTTGACTGTTTCCTGTCGATTTGTACCCCCCTGTTAGATACGGGGGGTTAAGT	0		35.54
GCA_026625945.1	NP1	S. pneumoniae	ICE	53831	144711..198541	rplL	MOBP1	typeFATA	AAGGGGCTTGGGGATTTCCCCAA	0		39.52
GCA_026625945.1	NP1	S. pneumoniae	ICE	74008	1364538..1438545	rplL	profile_MOBT,MOBP1	typeFATA	GTATGTCAACTTTTAAAGCCCATTTGACATACGCTGAAATTTTGTAAATCCCTTGTAACCAAAGGATTTTCTAATGTTTTTTTGACTGTTTCCTGTCGATTTGTACCCCCCTGTTAGATACGGGGGGTTAAGT	1	tet(M)	34.19
GCA_026625965.1	NP2	S. pneumoniae	ICE	25126	1412556..1437681	NA	MOBP1,profile_MOBT	typeFA	ACTTAACCCCCCGTATCTAACAGGGGGGTACAAATCGACAGGAAACAGTCAAAAAAACATTAGAAAATCCTTTGGTTACAAGGGATTTACAAAATTTCAGCGTATGTCAAATGGGCTTTAAAAGTTGACATAC	0		35.54
GCA_026625965.1	NP2	S. pneumoniae	ICE	26088	326724..352811	NA	MOBP1	typeFATA	TTGGGGAAATCCCCAAGCCCCTT	0		39.68
GCA_026625965.1	NP2	S. pneumoniae	ICE	74008	1367034..1441041	rplL	MOBP1,profile_MOBT	typeFATA	ACTTAACCCCCCGTATCTAACAGGGGGGTACAAATCGACAGGAAACAGTCAAAAAAACATTAGAAAATCCTTTGGTTACAAGGGATTTACAAAATTTCAGCGTATGTCAAATGGGCTTTAAAAGTTGACATAC	1	tet(M)	34.19
GCA_026683935.1	BC1	S. pneumoniae	ICE	26488	72584..99071	rplL	profile_MOBT	typeFA	GTATGTCAACTTTTAAAGCCCATTTGACATACGCTGAAATTTTGTAAATCCCTTGTAACCAAAGGATTTTCTAATGTTTTTTTGACTGTTTCCTGTCGATTTGTACCCCCCTGTTAGATACGGGGGGTTAAGT	1	tet(M)	38.59
GCA_026683935.1	BC1	S. pneumoniae	ICE	40250	69815..110064	rplL	profile_MOBT	typeFATA	GTATGTCAACTTTTAAAGCCCATTTGACATACGCTGAAATTTTGTAAATCCCTTGTAACCAAAGGATTTTCTAATGTTTTTTTGACTGTTTCCTGTCGATTTGTACCCCCCTGTTAGATACGGGGGGTTAAGT	0		37.57
GCA_026683915.1	BC2	S. pneumoniae	ICE	60259	859961..920219	rplL	profile_MOBT	typeFA	GTATGTCAACTTTTAAAGCCCATTTGACATACGCTGAAATTTTGTAAATCCCTTGTAACCAAAGGATTTTCTAATGTTTTTTTGACTGTTTCCTGTCGATTTGTACCCCCCTGTTAGATACGGGGGGTTAAGT	4	erm(B); mef(A); msr(D); tet(M)	37.8
GCA_028865625.1		S. pneumoniae	ICE	23033	1163917..1186949	plcR	profile_MOBT	typeFA	ACTTAACCCCCCGTATCTAACAGGGGGGTACAAATCGACAGGAAACAGTCAAAAAAACATTAGAAAATCCTTTGGTTACAAGGGATTTACAAAATTTCAGCGTATGTCAAATGGGCTTTAAAAGTTGACATAC	3	tet(M); msr(D); mef(A)	38.51
GCA_028865775.1		S. pneumoniae	ICE	23033	871741..894773	plcR	profile_MOBT	typeFA	ACTTAACCCCCCGTATCTAACAGGGGGGTACAAATCGACAGGAAACAGTCAAAAAAACATTAGAAAATCCTTTGGTTACAAGGGATTTACAAAATTTCAGCGTATGTCAAATGGGCTTTAAAAGTTGACATAC	3	tet(M); msr(D); mef(A)	38.51
GCA_028865905.1		S. pneumoniae	ICE	23033	1041323..1064355	plcR	profile_MOBT	typeFA	ACTTAACCCCCCGTATCTAACAGGGGGGTACAAATCGACAGGAAACAGTCAAAAAAACATTAGAAAATCCTTTGGTTACAAGGGATTTACAAAATTTCAGCGTATGTCAAATGGGCTTTAAAAGTTGACATAC	3	tet(M); msr(D); mef(A)	38.51
GCA_028866055.1		S. pneumoniae	ICE	23033	969283..992315	plcR	profile_MOBT	typeFA	ACTTAACCCCCCGTATCTAACAGGGGGGTACAAATCGACAGGAAACAGTCAAAAAAACATTAGAAAATCCTTTGGTTACAAGGGATTTACAAAATTTCAGCGTATGTCAAATGGGCTTTAAAAGTTGACATAC	3	tet(M); msr(D); mef(A)	38.51
GCA_028866195.1		S. pneumoniae	ICE	23033	1144117..1167149	plcR	profile_MOBT	typeFA	GTATGTCAACTTTTAAAGCCCATTTGACATACGCTGAAATTTTGTAAATCCCTTGTAACCAAAGGATTTTCTAATGTTTTTTTGACTGTTTCCTGTCGATTTGTACCCCCCTGTTAGATACGGGGGGTTAAGT	3	mef(A); msr(D); tet(M)	38.51
GCA_028866365.1		S. pneumoniae	ICE	25882	1193487..1219368	ftsE	profile_MOBT	typeFA	GTATGTCAACTTTTAAAGCCCATTTGACATACGCTGAAATTTTGTAAATCCCTTGTAACCAAAGGATTTTCTAATGTTTTTTTGACTGTTTCCTGTCGATTTGTACCCCCCTGTTAGATACGGGGGGTTAAGT	4	mef(A); msr(D); tet(M); erm(B)	38.06
GCA_028866515.1		S. pneumoniae	ICE	25882	1328990..1354871	ftsE	profile_MOBT	typeFA	ACTTAACCCCCCGTATCTAACAGGGGGGTACAAATCGACAGGAAACAGTCAAAAAAACATTAGAAAATCCTTTGGTTACAAGGGATTTACAAAATTTCAGCGTATGTCAAATGGGCTTTAAAAGTTGACATAC	4	erm(B); tet(M); msr(D); mef(A)	38.06
GCA_028866675.1		S. pneumoniae	ICE	25882	1199661..1225542	ftsE	profile_MOBT	typeFA	GTATGTCAACTTTTAAAGCCCATTTGACATACGCTGAAATTTTGTAAATCCCTTGTAACCAAAGGATTTTCTAATGTTTTTTTGACTGTTTCCTGTCGATTTGTACCCCCCTGTTAGATACGGGGGGTTAAGT	4	mef(A); msr(D); tet(M); erm(B)	38.06
GCA_028866875.1		S. pneumoniae	ICE	53571	245810..299380	rplL	MOBP1	typeFA	GTATGTCAACTTTTAAAGCCCATTTGACATACGCTGAAATTTTGTAAATCCCTTGTAACCAAAGGATTTTCTAATGTTTTTTTGACTGTTTCCTGTCGATTTGTACCCCCCTGTTAGATACGGGGGGTTAAGT	1	erm(B)	35.23
GCA_028866875.1		S. pneumoniae	ICE	64989	242450..307438	rplL	MOBP1	typeFATA	GTATGTCAACTTTTAAAGCCCATTTGACATACGCTGAAATTTTGTAAATCCCTTGTAACCAAAGGATTTTCTAATGTTTTTTTGACTGTTTCCTGTCGATTTGTACCCCCCTGTTAGATACGGGGGGTTAAGT	1	tet(M)	35.16
GCA_028867005.1		S. pneumoniae	ICE	25882	603989..629870	ftsE	profile_MOBT	typeFA	GTATGTCAACTTTTAAAGCCCATTTGACATACGCTGAAATTTTGTAAATCCCTTGTAACCAAAGGATTTTCTAATGTTTTTTTGACTGTTTCCTGTCGATTTGTACCCCCCTGTTAGATACGGGGGGTTAAGT	4	mef(A); msr(D); tet(M); erm(B)	38.05
GCA_038431465.1	2018C08-270	S. pneumoniae	ICE	53572	1199405..1252976	rplL	MOBP1	typeFA	GTATGTCAACTTTTAAAGCCCATTTGACATACGCTGAAATTTTGTAAATCCCTTGTAACCAAAGGATTTTCTAATGTTTTTTTGACTGTTTCCTGTCGATTTGTACCCCCCTGTTAGATACGGGGGGTTAAGT	1	erm(B)	35.24
GCA_038431465.1	2018C08-270	S. pneumoniae	ICE	64925	1196110..1261034	rplL	MOBP1	typeFATA	GTATGTCAACTTTTAAAGCCCATTTGACATACGCTGAAATTTTGTAAATCCCTTGTAACCAAAGGATTTTCTAATGTTTTTTTGACTGTTTCCTGTCGATTTGTACCCCCCTGTTAGATACGGGGGGTTAAGT	1	tet(M)	35.17
GCA_038431575.1	2016C10-332	S. pneumoniae	ICE	34528	1244118..1278645	rpmH	profile_MOBT	typeFA	ACTTAACCCCCCGTATCTAACAGGGGGGTACAAATCGACAGGAAACAGTCAAAAAAACATTAGAAAATCCTTTGGTTACAAGGGATTTACAAAATTTCAGCGTATGTCAAATGGGCTTTAAAAGTTGACATAC	4	erm(B); tet(M); msr(D); mef(A)	37.47
GCA_038431575.1	2016C10-332	S. pneumoniae	ICE	87795	1192724..1280518	rplL	MOBP1,profile_MOBT	typeFATA	ACTTAACCCCCCGTATCTAACAGGGGGGTACAAATCGACAGGAAACAGTCAAAAAAACATTAGAAAATCCTTTGGTTACAAGGGATTTACAAAATTTCAGCGTATGTCAAATGGGCTTTAAAAGTTGACATAC	0		34.34
GCA_038431685.1	2016S11-245	S. pneumoniae	ICE	25882	1761533..1787414	ftsE	profile_MOBT	typeFA	ACTTAACCCCCCGTATCTAACAGGGGGGTACAAATCGACAGGAAACAGTCAAAAAAACATTAGAAAATCCTTTGGTTACAAGGGATTTACAAAATTTCAGCGTATGTCAAATGGGCTTTAAAAGTTGACATAC	4	erm(B); tet(M); msr(D); mef(A)	38.06
GCA_038431725.1	2014C08-275	S. pneumoniae	ICE	25882	1763441..1789322	ftsE	profile_MOBT	typeFA	ACTTAACCCCCCGTATCTAACAGGGGGGTACAAATCGACAGGAAACAGTCAAAAAAACATTAGAAAATCCTTTGGTTACAAGGGATTTACAAAATTTCAGCGTATGTCAAATGGGCTTTAAAAGTTGACATAC	4	erm(B); tet(M); msr(D); mef(A)	38.06
GCA_038431755.1	2008C09-280	S. pneumoniae	ICE	31682	1275609..1307290	rpmH	profile_MOBT	typeFA	ACTTAACCCCCCGTATCTAACAGGGGGGTACAAATCGACAGGAAACAGTCAAAAAAACATTAGAAAATCCTTTGGTTACAAGGGATTTACAAAATTTCAGCGTATGTCAAATGGGCTTTAAAAGTTGACATAC	3	tet(M); msr(D); mef(A)	37.74
GCA_038431755.1	2008C09-280	S. pneumoniae	ICE	96856	1212308..1309163	rplL	MOBP1,profile_MOBT	typeFATA	ACTTAACCCCCCGTATCTAACAGGGGGGTACAAATCGACAGGAAACAGTCAAAAAAACATTAGAAAATCCTTTGGTTACAAGGGATTTACAAAATTTCAGCGTATGTCAAATGGGCTTTAAAAGTTGACATAC	0		34.11
GCA_041228315.1	serotype 4	S. pneumoniae	ICE	25117	945909..971025	rplL	MOBP1	typeFATA	NA	0		43.49
GCA_040687865.1	SP264	S. pneumoniae	ICE	20056	910783..930838	rplL	profile_MOBT	typeFA	GTATGTCAACTTTTAAAGCCCATTTGACATACGCTGAAATTTTGTAAATCCCTTGTAACCAAAGGATTTTCTAATGTTTTTTTGACTGTTTCCTGTCGATTTGTACCCCCCTGTTAGATACGGGGGGTTAAGT	0		38.53
GCA_040687865.1	SP264	S. pneumoniae	ICE	90432	902799..993230	rplL	profile_MOBT,MOBP1	typeFATA	GTATGTCAACTTTTAAAGCCCATTTGACATACGCTGAAATTTTGTAAATCCCTTGTAACCAAAGGATTTTCTAATGTTTTTTTGACTGTTTCCTGTCGATTTGTACCCCCCTGTTAGATACGGGGGGTTAAGT	1	tet(M)	33.93
GCA_040687885.1	Spn1439-106	S. pneumoniae	ICE	50141	1074108..1124248	rpmH	profile_MOBT	typeFA	ACTTAACCCCCCGTATCTAACAGGGGGGTACAAATCGACAGGAAACAGTCAAAAAAACATTAGAAAATCCTTTGGTTACAAGGGATTTACAAAATTTCAGCGTATGTCAAATGGGCTTTAAAAGTTGACATAC	1	tet(M)	38.64
GCA_040687885.1	Spn1439-106	S. pneumoniae	ICE	86041	1074108..1160148	rplL	profile_MOBT,MOBP1	typeFATA	ACTTAACCCCCCGTATCTAACAGGGGGGTACAAATCGACAGGAAACAGTCAAAAAAACATTAGAAAATCCTTTGGTTACAAGGGATTTACAAAATTTCAGCGTATGTCAAATGGGCTTTAAAAGTTGACATAC	0		36.61
GCA_040687925.1	DP1322	S. pneumoniae	ICE	50676	1013650..1064325	rplL	profile_MOBT	typeFA	GTATGTCAACTTTTAAAGCCCATTTGACATACGCTGAAATTTTGTAAATCCCTTGTAACCAAAGGATTTTCTAATGTTTTTTTGACTGTTTCCTGTCGATTTGTACCCCCCTGTTAGATACGGGGGGTTAAGT	1	tet(M)	38.6
GCA_040687925.1	DP1322	S. pneumoniae	ICE	86067	1013650..1099716	rplL	profile_MOBT,MOBP1	typeFATA	GTATGTCAACTTTTAAAGCCCATTTGACATACGCTGAAATTTTGTAAATCCCTTGTAACCAAAGGATTTTCTAATGTTTTTTTGACTGTTTCCTGTCGATTTGTACCCCCCTGTTAGATACGGGGGGTTAAGT	0		36.59
GCA_040687975.1		S. pneumoniae	ICE	63539	1149234..1212772	rpmH	profile_MOBT	typeFA	ACTTAACCCCCCGTATCTAACAGGGGGGTACAAATCGACAGGAAACAGTCAAAAAAACATTAGAAAATCCTTTGGTTACAAGGGATTTACAAAATTTCAGCGTATGTCAAATGGGCTTTAAAAGTTGACATAC	1	tet(M)	37.48
GCA_040687975.1		S. pneumoniae	ICE	99382	1149234..1248615	rplL	profile_MOBT,MOBP1	typeFATA	ACTTAACCCCCCGTATCTAACAGGGGGGTACAAATCGACAGGAAACAGTCAAAAAAACATTAGAAAATCCTTTGGTTACAAGGGATTTACAAAATTTCAGCGTATGTCAAATGGGCTTTAAAAGTTGACATAC	0		35.6
GCA_000026665.1	ATCC 700669	S. pneumoniae	ICE	20056	1258170..1278225	rpmH	profile_MOBT	typeFA	ACTTAACCCCCCGTATCTAACAGGGGGGTACAAATCGACAGGAAACAGTCAAAAAAACATTAGAAAATCCTTTGGTTACAAGGGATTTACAAAATTTCAGCGTATGTCAAATGGGCTTTAAAAGTTGACATAC	0		38.53
GCA_000026665.1	ATCC 700669	S. pneumoniae	ICE	53993	1232217..1286209	rpmH	profile_MOBT	typeFATA	ACTTAACCCCCCGTATCTAACAGGGGGGTACAAATCGACAGGAAACAGTCAAAAAAACATTAGAAAATCCTTTGGTTACAAGGGATTTACAAAATTTCAGCGTATGTCAAATGGGCTTTAAAAGTTGACATAC	1	tet(M)	36.23
GCA_900692595.1		S. pneumoniae	ICE	54449	1145447..1199895	rplL	profile_MOBT,MOBP1	typeFA	ACTTAACCCCCCGTATCTAACAGGGGGGTACAAATCGACAGGAAACAGTCAAAAAAACATTAGAAAATCCTTTGGTTACAAGGGATTTACAAAATTTCAGCGTATGTCAAATGGGCTTTAAAAGTTGACATAC	1	tet(M)	36.45
GCA_900692595.1		S. pneumoniae	ICE	58747	1141149..1199895	rplL	profile_MOBT,MOBP1	typeFATA	ACTTAACCCCCCGTATCTAACAGGGGGGTACAAATCGACAGGAAACAGTCAAAAAAACATTAGAAAATCCTTTGGTTACAAGGGATTTACAAAATTTCAGCGTATGTCAAATGGGCTTTAAAAGTTGACATAC	0		36.21
GCA_900692605.1		S. pneumoniae	ICE	17527	1246924..1264450	rpmH	profile_MOBT	typeFA	ACTTAACCCCCCGTATCTAACAGGGGGGTACAAATCGACAGGAAACAGTCAAAAAAACATTAGAAAATCCTTTGGTTACAAGGGATTTACAAAATTTCAGCGTATGTCAAATGGGCTTTAAAAGTTGACATAC	1	tet(M)	39.12
GCA_900692605.1		S. pneumoniae	ICE	66293	925664..991956	rplL	MOBP1	typeFATA	NA	0		36.52
GCA_900692615.1		S. pneumoniae	ICE	25879	876299..902177	smpB	profile_MOBT	typeFA	TTAACCCCCCGTATCTAACAGGGGGGTACAAATCGACAGGAAACAGTCAAAAAAACATTAGAAAATCCTTTGGTTACAAGGGATTTACAAAATTTCAGCGTATGTAAAATGGGCTTTAAAAGTTGACATAC	1	tet(M)	38.42
GCA_900692655.1		S. pneumoniae	ICE	17524	894233..911756	galM	profile_MOBT	typeFA	GTATGTCAACTTTTAAAGCCCATTTGACATACGCTGAAATTTTGTAAATCCCTTGTAACCAAAGGATTTTCTAATGTTTTTTTGACTGTTTCCTGTCGATTTGTACCCCCCTGTTAGATACGGGGGGTTAAGT	1	tet(M)	39.06
GCA_900692705.1		S. pneumoniae	ICE	40471	975618..1016088	rpmH	profile_MOBT	typeFA	ACTTAACCCCCCGTATCTAACAGGGGGGTACAAATCGACAGGAAACAGTCAAAAAAACATTAGAAAATCCTTTGGTTACAAGGGATTTACAAAATTTCAGCGTATGTCAAATGGGCTTTAAAAGTTGACATAC	1	tet(M)	37.53
GCA_900692705.1		S. pneumoniae	ICE	43240	975618..1018857	rpmH	profile_MOBT	typeFATA	ACTTAACCCCCCGTATCTAACAGGGGGGTACAAATCGACAGGAAACAGTCAAAAAAACATTAGAAAATCCTTTGGTTACAAGGGATTTACAAAATTTCAGCGTATGTCAAATGGGCTTTAAAAGTTGACATAC	0		37.39
GCA_900692825.1		S. pneumoniae	ICE	26644	1257812..1284455	rplL	profile_MOBT	typeFA	GTATGTCAACTTTTAAAGCCCATTTGACATACGCTGAAATTTTGTAAATCCCTTGTAACCAAAGGATTTTCTAATGTTTTTTTGACTGTTTCCTGTCGATTTGTACCCCCCTGTTAGATACGGGGGGTTAAGT	1	tet(M)	38.56
GCA_900692825.1		S. pneumoniae	ICE	82001	1205223..1287223	rplL	MOBP1,profile_MOBT	typeFATA	GTATGTCAACTTTTAAAGCCCATTTGACATACGCTGAAATTTTGTAAATCCCTTGTAACCAAAGGATTTTCTAATGTTTTTTTGACTGTTTCCTGTCGATTTGTACCCCCCTGTTAGATACGGGGGGTTAAGT	0		35
GCA_900692845.1		S. pneumoniae	ICE	17524	33686..51209	galM	profile_MOBT	typeFA	ACTTAACCCCCCGTATCTAACAGGGGGGTACAAATCGACAGGAAACAGTCAAAAAAACATTAGAAAATCCTTTGGTTACAAGGGATTTACAAAATTTCAGCGTATGTCAAATGGGCTTTAAAAGTTGACATAC	1	tet(M)	39
GCA_900692855.1		S. pneumoniae	ICE	43045	1180114..1223158	rplL	MOBP1,profile_MOBT	typeFA	ACTTAACCCCCCGTATCTAACAGGGGGGTACAAATCGACAGGAAACAGTCAAAAAAACATTAGAAAATCCTTTGGTTACAAGGGATTTACAAAATTTCAGCGTATGTCAAATGGGCTTTAAAAGTTGACATAC	0		35.08
GCA_900692855.1		S. pneumoniae	ICE	74469	1180114..1254582	rplL	MOBP1,profile_MOBT	typeFATA	ACTTAACCCCCCGTATCTAACAGGGGGGTACAAATCGACAGGAAACAGTCAAAAAAACATTAGAAAATCCTTTGGTTACAAGGGATTTACAAAATTTCAGCGTATGTCAAATGGGCTTTAAAAGTTGACATAC	3	tet(M); msr(D); mef(A)	35.62
GCA_900692935.1	GPSC10 substr. ST2013	S. pneumoniae	ICE	74366	899637..974002	rplL	profile_MOBT,MOBP1	typeFA	GTATGTCAACTTTTAAAGCCCATTTGACATACGCTGAAATTTTGTAAATCCCTTGTAACCAAAGGATTTTCTAATGTTTTTTTGACTGTTTCCTGTCGATTTGTACCCCCCTGTTAGATACGGGGGGTTAAGT	1	tet(M)	34.97
GCA_900692935.1	GPSC10 substr. ST2013	S. pneumoniae	ICE	76201	897802..974002	rplL	profile_MOBT,MOBP1	typeFATA	GTATGTCAACTTTTAAAGCCCATTTGACATACGCTGAAATTTTGTAAATCCCTTGTAACCAAAGGATTTTCTAATGTTTTTTTGACTGTTTCCTGTCGATTTGTACCCCCCTGTTAGATACGGGGGGTTAAGT	0		34.92
GCA_900692975.1		S. pneumoniae	ICE	18894	868302..887195	smpB	profile_MOBT	typeFA	TTAACCCCCCGTATCTAACAGGGGGGTACAAATCGACAGGAAACAGTCAAAAAAACATTAGAAAATCCTTTGGTTACAAGGGATTTACAAAATTTCAGCGTATGTAAAATGGGCTTTAAAAGTTGACATAC	1	tet(M)	38.67
GCA_900692955.1		S. pneumoniae	ICE	55134	1036677..1091810	rplL	profile_MOBT,MOBP1	typeFA	ACTTAACCCCCCGTATCTAACAGGGGGGTACAAATCGACAGGAAACAGTCAAAAAAACATTAGAAAATCCTTTGGTTACAAGGGATTTACAAAATTTCAGCGTATGTCAAATGGGCTTTAAAAGTTGACATAC	1	tet(M)	36.5
GCA_900692955.1		S. pneumoniae	ICE	59406	1032405..1091810	rplL	profile_MOBT,MOBP1	typeFATA	ACTTAACCCCCCGTATCTAACAGGGGGGTACAAATCGACAGGAAACAGTCAAAAAAACATTAGAAAATCCTTTGGTTACAAGGGATTTACAAAATTTCAGCGTATGTCAAATGGGCTTTAAAAGTTGACATAC	0		36.3
GCA_900693005.1		S. pneumoniae	ICE	60022	1265625..1325646	rplL	MOBP1,profile_MOBT	typeFA	ACTTAACCCCCCGTATCTAACAGGGGGGTACAAATCGACAGGAAACAGTCAAAAAAACATTAGAAAATCCTTTGGTTACAAGGGATTTACAAAATTTCAGCGTATGTCAAATGGGCTTTAAAAGTTGACATAC	2	tet(M); erm(B)	36.22
GCA_900693005.1		S. pneumoniae	ICE	64291	1265625..1329915	rplL	MOBP1,profile_MOBT	typeFATA	ACTTAACCCCCCGTATCTAACAGGGGGGTACAAATCGACAGGAAACAGTCAAAAAAACATTAGAAAATCCTTTGGTTACAAGGGATTTACAAAATTTCAGCGTATGTCAAATGGGCTTTAAAAGTTGACATAC	0		36.05
GCA_900693025.1	2245STDY6178787	S. pneumoniae	ICE	42686	1307075..1349760	rplL	profile_MOBT	typeFA	GTATGTCAACTTTTAAAGCCCATTTGACATACGCTGAAATTTTGTAAATCCCTTGTAACCAAAGGATTTTCTAATGTTTTTTTGACTGTTTCCTGTCGATTTGTACCCCCCTGTTAGATACGGGGGGTTAAGT	2	tet(M); erm(B)	36.79
GCA_900693025.1	2245STDY6178787	S. pneumoniae	ICE	54753	1297776..1352528	rplL	profile_MOBT	typeFATA	GTATGTCAACTTTTAAAGCCCATTTGACATACGCTGAAATTTTGTAAATCCCTTGTAACCAAAGGATTTTCTAATGTTTTTTTGACTGTTTCCTGTCGATTTGTACCCCCCTGTTAGATACGGGGGGTTAAGT	0		36
GCA_900693045.1		S. pneumoniae	ICE	78990	755640..834629	NA	profile_MOBT,MOBP1	typeFA	TTAACCCCCCGTATCTAACAGGGGGGTACAAATCGACAGGAAACAGTCAAAAAAACATTAGAAAATCCTTTGGTTACAAGGGATTTACAAAATTTCAGCGTATGTCAAATGGGCTTTAAAAGTTGACATAC	2	erm(B); tet(M)	31.74
GCA_900693045.1		S. pneumoniae	ICE	80199	754431..834629	NA	profile_MOBT,MOBP1	typeFATA	TTAACCCCCCGTATCTAACAGGGGGGTACAAATCGACAGGAAACAGTCAAAAAAACATTAGAAAATCCTTTGGTTACAAGGGATTTACAAAATTTCAGCGTATGTCAAATGGGCTTTAAAAGTTGACATAC	0		31.74
GCA_930986525.1	RMV7	S. pneumoniae	ICE	25882	818475..844356	ftsE	profile_MOBT	typeFA	GTATGTCAACTTTTAAAGCCCATTTGACATACGCTGAAATTTTGTAAATCCCTTGTAACCAAAGGATTTTCTAATGTTTTTTTGACTGTTTCCTGTCGATTTGTACCCCCCTGTTAGATACGGGGGGTTAAGT	4	mef(A); msr(D); tet(M); erm(B)	38.06
GCA_901542335.1	NCTC10710	S. porcinus	ICE	100073	841340..941412	NA	MOBP1	typeFATA	AGGGGTTTGGGGATTTCCCCAACAAGC	0		31.87
GCA_901542335.1	NCTC10710	S. porcinus	ICE	59114	1058582..1117695	NA	MOBP1	typeFATA	NA	0		36.83
GCA_901542335.1	NCTC10710	S. porcinus	ICE	61231	554098..615328	rplL	MOBP1	typeFATA	NA	0		33.74
GCA_901553735.1	NCTC10925	S. porcinus	ICE	67799	634378..702176	rplL	MOBP1,profile_MOBT	typeFA	ACTTAACCCCCCGTATCTAACAGGGGGGTACAAATCGACAGGAAACAGTCAAAAAAACATTAGAAAATCCTTTGGTTACAAGGGATTTACAAAATTTCAGCGTATGTCAAATGGGCTTTAAAAGTTGACATAC	1	tet(M)	36.86
GCA_901553735.1	NCTC10925	S. porcinus	ICE	70016	632161..702176	rplL	MOBP1,profile_MOBT	typeFATA	ACTTAACCCCCCGTATCTAACAGGGGGGTACAAATCGACAGGAAACAGTCAAAAAAACATTAGAAAATCCTTTGGTTACAAGGGATTTACAAAATTTCAGCGTATGTCAAATGGGCTTTAAAAGTTGACATAC	0		36.94
GCA_901553755.1	NCTC10924	S. porcinus	ICE	53797	999329..1053125	rplL	MOBP1	typeFATA	NA	0		37.43
GCA_900475415.1	NCTC10999	S. porcinus	ICE	63690	636627..700316	NA	MOBV,MOBP1	typeFATA	NA	1	tet(O)	39.66
GCA_900637075.1	NCTC13786	S. pseudoporcinus	ICE	113536	2238..115773	NA	MOBQ,MOBP1	typeFATA	NA	0		32.88
GCA_900637075.1	NCTC13786	S. pseudoporcinus	ICE	121605	503481..625085	rplL	MOBP1,MOBQ,profile_MOBT	typeFATA	ACTTAACCCCCCGTATCTAACAGGGGGGTACAAATCGACAGGAAACAGTCAAAAAAACATTAGAAAATCCTTTGGTTACAAGGGATTTACAAAATTTCAGCGTATGTCAAATGGGCTTTAAAAGTTGACATAC	0		35.09
GCA_900637075.1	NCTC13786	S. pseudoporcinus	ICE	121123	503481..624603	rplL	MOBP1,MOBQ,profile_MOBT	typeFA	ACTTAACCCCCCGTATCTAACAGGGGGGTACAAATCGACAGGAAACAGTCAAAAAAACATTAGAAAATCCTTTGGTTACAAGGGATTTACAAAATTTCAGCGTATGTCAAATGGGCTTTAAAAGTTGACATAC	1	tet(M)	35.09
GCA_902141225.1	NCTC10228	S. pseudoporcinus	ICE	39942	1464278..1504219	rplL	MOBP1	typeFATA	NA	0		35.47
GCA_000275625.1	HKU QMH11M0907901	S. pyogenes	ICE	68934	816424..885357	NA	MOBP1,profile_MOBT	typeFA	NA	0		NA
GCA_000275625.1	HKU QMH11M0907901	S. pyogenes	ICE	69416	815942..885357	NA	MOBP1,profile_MOBT	typeFATA	NA	0		NA
GCA_014192005.1	KUN-0012590	S. pyogenes	ICE	17527	211898..229424	rpmH	profile_MOBT	typeFA	ACTTAACCCCCCGTATCTAACAGGGGGGTACAAATCGACAGGAAACAGTCAAAAAAACATTAGAAAATCCTTTGGTTACAAGGGATTTACAAAATTTCAGCGTATGTCAAATGGGCTTTAAAAGTTGACATAC	1	tet(M)	39.12
GCA_000013545.1	MGAS10750	S. pyogenes	ICE	46932	1623317..1670248	rplL	MOBP1	typeFATA	NA	1	erm(A)	31.3
GCA_000732345.1		S. pyogenes	ICE	26951	1678038..1704988	tRNA-Asn	profile_MOBT	typeFA	GTATGTCAACTTTTAAAGCCCATTTGACATACGCTGAAATTTTGTAAATCCCTTGTAACCAAAGGATTTTCTAATGTTTTTTTGACTGTTTCCTGTCGATTTGTACCCCCCTGTTAGATACGGGGGGTTAAGT	1	tet(M)	37.52
GCA_000732385.1	STAB901	S. pyogenes	ICE	26369	858945..885313	NA	profile_MOBT	typeFA	ACTTACCCCCCCGTATCTAACAGGGGGGTACAAATCGACAGGAAACAGTCAAAAAAACATTAGAAAATCCTTTGGTTACAAGGGATTTACAAAATTTCAGCGTATGTCAAATGGGCTTTAAAAGTTGACATAC	1	tet(M)	37.04
GCA_000767505.1	7F7	S. pyogenes	ICE	26951	1678384..1705334	tRNA-Asn	profile_MOBT	typeFA	GTATGTCAACTTTTAAAGCCCATTTGACATACGCTGAAATTTTGTAAATCCCTTGTAACCAAAGGATTTTCTAATGTTTTTTTGACTGTTTCCTGTCGATTTGTACCCCCCTGTTAGATACGGGGGGTTAAGT	1	tet(M)	37.52
GCA_000772185.1	HKU360	S. pyogenes	ICE	65080	1048115..1113194	NA	profile_MOBT,MOBP1	typeFA	NA	0		NA
GCA_000772185.1	HKU360	S. pyogenes	ICE	65562	1048115..1113676	NA	profile_MOBT,MOBP1	typeFATA	NA	0		NA
GCA_001267805.1	NGAS322	S. pyogenes	ICE	75922	1095205..1171126	rplL	MOBP1,profile_MOBT	typeFA	ACTTAACCCCCCGTATCTAACAGGGGGGTACAAATCGACAGGAAACAGTCAAAAAAACATTAGAAAATCCTTTGGTTACAAGGGATTTACAAAATTTCAGCGTATGTCAAATGGGCTTTAAAAGTTGACATAC	0		34.95
GCA_001267805.1	NGAS322	S. pyogenes	ICE	77131	1095205..1172335	rplL	MOBP1,profile_MOBT	typeFATA	ACTTAACCCCCCGTATCTAACAGGGGGGTACAAATCGACAGGAAACAGTCAAAAAAACATTAGAAAATCCTTTGGTTACAAGGGATTTACAAAATTTCAGCGTATGTCAAATGGGCTTTAAAAGTTGACATAC	3	tet(M); erm(A); aph(3')-III	34.89
GCA_001023495.1	STAB10015	S. pyogenes	ICE	69842	1073824..1143665	NA	MOBQ,MOBP1	typeFATA	NA	0		34.65
GCA_001051095.1	HKU488	S. pyogenes	ICE	65040	1087037..1152076	rplL	profile_MOBT,MOBP1	typeFA	GTATGTCAACTTTTAAAGCCCATTTGACATACGCTGAAATTTTGTAAATCCCTTGTAACCAAAGGATTTTCTAATGTTTTTTTGACTGTTTCCTGTCGATTTGTACCCCCCTGTTAGATACGGGGGGTTAAGT	0		36.69
GCA_001051095.1	HKU488	S. pyogenes	ICE	65522	1087037..1152558	rplL	profile_MOBT,MOBP1	typeFATA	GTATGTCAACTTTTAAAGCCCATTTGACATACGCTGAAATTTTGTAAATCCCTTGTAACCAAAGGATTTTCTAATGTTTTTTTGACTGTTTCCTGTCGATTTGTACCCCCCTGTTAGATACGGGGGGTTAAGT	2	tet(M); erm(B)	36.68
GCA_001535565.1	MEW123	S. pyogenes	ICE	54080	747036..801115	NA	MOBQ,MOBP1	typeFATA	NA	0		35.37
GCA_002844355.1	JS12	S. pyogenes	ICE	69276	1053089..1122364	rplL	profile_MOBT	typeFA	GTATGTCAACTTTTAAAGCCCATTTGACATACGCTGAAATTTTGTAAATCCCTTGTAACCAAAGGATTTTCTAATGTTTTTTTGACTGTTTCCTGTCGATTTGTACCCCCCTGTTAGATACGGGGGGTTAAGT	0		37.1
GCA_002844355.1	JS12	S. pyogenes	ICE	69758	1053089..1122846	rplL	profile_MOBT	typeFATA	GTATGTCAACTTTTAAAGCCCATTTGACATACGCTGAAATTTTGTAAATCCCTTGTAACCAAAGGATTTTCTAATGTTTTTTTGACTGTTTCCTGTCGATTTGTACCCCCCTGTTAGATACGGGGGGTTAAGT	2	tet(L); tet(M)	37.09
GCA_003352145.1	DMG1800716	S. pyogenes	ICE	17469	1001029..1018497	rplL	profile_MOBT	typeFA	GTATGTCAACTTTTAAAGCCCATTTGACATACGCTGAAATTTTGTAAATCCCTTGTAACCAAAGGATTTTCTAATGTTTTTTTGACTGTTTCCTGTCGATTTGTACCCCCCTGTTAGATACGGGGGGTTAAGT	1	tet(M)	39.14
GCA_003352145.1	DMG1800716	S. pyogenes	ICE	43805	1090434..1134238	rplL	MOBP1	typeFATA	NA	0		31
GCA_004154045.1	MGAS29326	S. pyogenes	ICE	69952	744873..814824	NA	MOBQ,MOBP1	typeFATA	NA	0		34.65
GCA_004154385.1	MGAS11052	S. pyogenes	ICE	69948	746037..815984	NA	MOBQ,MOBP1	typeFATA	NA	0		34.65
GCA_004154005.1	MGAS7888	S. pyogenes	ICE	87979	1027640..1115618	NA	MOBQ,MOBP1	typeFATA	NA	1	erm(A)	32.35
GCA_004123995.1	TSPY155	S. pyogenes	ICE	65567	1067850..1133416	rplL	profile_MOBT,MOBP1	typeFA	GTATGTCAACTTTTAAAGCCCATTTGACATACGCTGAAATTTTGTAAATCCCTTGTAACCAAAGGATTTTCTAATGTTTTTTTGACTGTTTCCTGTCGATTTGTACCCCCCTGTTAGATACGGGGGGTTAAGT	0		36.73
GCA_004123995.1	TSPY155	S. pyogenes	ICE	66049	1067850..1133898	rplL	profile_MOBT,MOBP1	typeFATA	GTATGTCAACTTTTAAAGCCCATTTGACATACGCTGAAATTTTGTAAATCCCTTGTAACCAAAGGATTTTCTAATGTTTTTTTGACTGTTTCCTGTCGATTTGTACCCCCCTGTTAGATACGGGGGGTTAAGT	2	tet(M); erm(B)	36.73
GCA_004124015.1	TSPY556	S. pyogenes	ICE	69943	743688..813630	rplL	MOBP1	typeFATA	NA	3	ant(6)-Ia; aph(3')-III; tet(M)	34.19
GCA_004124135.1	TSPY165	S. pyogenes	ICE	17524	445051..462574	galM	profile_MOBT	typeFA	ACTTAACCCCCCGTATCTAACAGGGGGGTACAAATCGACAGGAAACAGTCAAAAAAACATTAGAAAATCCTTTGGTTACAAGGGATTTACAAAATTTCAGCGTATGTCAAATGGGCTTTAAAAGTTGACATAC	1	tet(M)	38.99
GCA_005160785.1	emmSTG866.1	S. pyogenes	ICE	28249	952648..980896	NA	profile_MOBT	typeFA	CCCCCCTGTTAGATAGAGGGGGC	1	tet(M)	36.43
GCA_005163705.1	emm65	S. pyogenes	ICE	67339	713311..780649	rpmH	profile_MOBT	typeFA	ACTTAACCCCCCGTATCTAACAGGGGGGTACAAATCGACAGGAAACAGTCAAAAAAACATTAGAAAATCCTTTGGTTACAAGGGATTTACAAAATTTCAGCGTATGTCAAATGGGCTTTAAAAGTTGACATAC	2	tet(M); tet(L)	36.9
GCA_005163705.1	emm65	S. pyogenes	ICE	67821	712829..780649	rpmH	profile_MOBT	typeFATA	ACTTAACCCCCCGTATCTAACAGGGGGGTACAAATCGACAGGAAACAGTCAAAAAAACATTAGAAAATCCTTTGGTTACAAGGGATTTACAAAATTTCAGCGTATGTCAAATGGGCTTTAAAAGTTGACATAC	0		36.89
GCA_005163865.1	emm75.1	S. pyogenes	ICE	35423	960948..996370	NA		typeFATA	NA	0		43.68
GCA_005161325.1	emm64.3	S. pyogenes	ICE	17526	1639336..1656861	galM	profile_MOBT	typeFA	GTATGTCAACTTTTAAAGCCCATTTGACATACGCTGAAATTTTGTAAATCCCTTGTAACCAAAGGATTTTCTAATGTTTTTTTGACTGTTTCCTGTCGATTTGTACCCCCCTGTTAGATACGGGGGTTAAGT	1	tet(M)	39.11
GCA_005161605.1	emm22.8	S. pyogenes	ICE	54572	233531..288102	NA	MOBP1,MOBT	typeFATA	NA	4	ant(6)-Ia; aph(3')-III; erm(B); cat(pC194)	35.49
GCA_005161825.1	emm124	S. pyogenes	ICE	20544	517388..537931	tRNA-Ala	profile_MOBT	typeFA	GTATGTCAACTTTTAAAGCCCATTTTACATACGCTGAAATTTTGTAAATCCCTTGTAACCAAAGGATTTTCTAATGTTTTTTTGACTGTTTCCTGTCGATTTGTACCCCCCTGTTAGATACGGGGGGTTAA	1	tet(M)	39.88
GCA_005164885.1	emm90.5	S. pyogenes	ICE	17524	211736..229259	galM	profile_MOBT	typeFA	ACTTAACCCCCCGTATCTAACAGGGGGGTACAAATCGACAGGAAACAGTCAAAAAAACATTAGAAAATCCTTTGGTTACAAGGGATTTACAAAATTTCAGCGTATGTCAAATGGGCTTTAAAAGTTGACATAC	1	tet(M)	38.99
GCA_005162245.1	emm97.1	S. pyogenes	ICE	62334	997454..1059787	rplL	profile_MOBT,MOBP1	typeFA	GTATGTCAACTTTTAAAGCCCATTTGACATACGCTGAAATTTTGTAAATCCCTTGTAACCAAAGGATTTTCTAATGTTTTTTTGACTGTTTCCTGTCGATTTGTACCCCCCTGTTAGATACGGGGGGTTAAGT	0		37.24
GCA_005162245.1	emm97.1	S. pyogenes	ICE	62816	997454..1060269	rplL	profile_MOBT,MOBP1	typeFATA	GTATGTCAACTTTTAAAGCCCATTTGACATACGCTGAAATTTTGTAAATCCCTTGTAACCAAAGGATTTTCTAATGTTTTTTTGACTGTTTCCTGTCGATTTGTACCCCCCTGTTAGATACGGGGGGTTAAGT	1	tet(M)	37.22
GCA_009832845.1	1085	S. pyogenes	ICE	59574	854588..914161	rplL	MOBP1	typeFATA	NA	1	tet(T)	32.01
GCA_018140985.1	TSPY1687	S. pyogenes	ICE	66942	1008778..1075719	rplL	profile_MOBT,MOBP1	typeFA	GTATGTCAACTTTTAAAGCCCATTTGACATACGCTGAAATTTTGTAAATCCCTTGTAACCAAAGGATTTTCTAATGTTTTTTTGACTGTTTCCTGTCGATTTGTACCCCCCTGTTAGATACGGGGGGTTAAGT	0		36.7
GCA_018140985.1	TSPY1687	S. pyogenes	ICE	67424	1008778..1076201	rplL	profile_MOBT,MOBP1	typeFATA	GTATGTCAACTTTTAAAGCCCATTTGACATACGCTGAAATTTTGTAAATCCCTTGTAACCAAAGGATTTTCTAATGTTTTTTTGACTGTTTCCTGTCGATTTGTACCCCCCTGTTAGATACGGGGGGTTAAGT	2	tet(M); erm(B)	36.69
GCA_011290565.1	1040	S. pyogenes	ICE	72535	1556370..1628904	rlmD	MOBP1,MOBQ	typeFATA	NA	1	tet(T)	32.58
GCA_011290585.1	1043	S. pyogenes	ICE	72534	483662..556195	rplL	MOBP1	typeFATA	NA	1	tet(T)	32.58
GCA_028370195.1	SP1451	S. pyogenes	ICE	65576	1086349..1151924	rplL	profile_MOBT,MOBP1	typeFA	GTATGTCAACTTTTAAAGCCCATTTGACATACGCTGAAATTTTGTAAATCCCTTGTAACCAAAGGATTTTCTAATGTTTTTTTGACTGTTTCCTGTCGATTTGTACCCCCCTGTTAGATACGGGGGGTTAAGT	0		36.69
GCA_028370195.1	SP1451	S. pyogenes	ICE	66058	1086349..1152406	rplL	profile_MOBT,MOBP1	typeFATA	GTATGTCAACTTTTAAAGCCCATTTGACATACGCTGAAATTTTGTAAATCCCTTGTAACCAAAGGATTTTCTAATGTTTTTTTGACTGTTTCCTGTCGATTTGTACCCCCCTGTTAGATACGGGGGGTTAAGT	2	tet(M); erm(B)	36.68
GCA_020826915.1	TSPY141	S. pyogenes	ICE	55994	1035380..1091373	rplL	MOBP1,profile_MOBT	typeFA	ACTTAACCCCCCGTATCTAACAGGGGGGTACAAATCGACAGGAAACAGTCAAAAAAACATTAGAAAATCCTTTGGTTACAAGGGATTTACAAAATTTCAGCGTATGTCAAATGGGCTTTAAAAGTTGACATAC	0		36.24
GCA_020826915.1	TSPY141	S. pyogenes	ICE	56476	1035380..1091855	rplL	MOBP1,profile_MOBT	typeFATA	ACTTAACCCCCCGTATCTAACAGGGGGGTACAAATCGACAGGAAACAGTCAAAAAAACATTAGAAAATCCTTTGGTTACAAGGGATTTACAAAATTTCAGCGTATGTCAAATGGGCTTTAAAAGTTGACATAC	1	tet(M)	36.21
GCA_020826935.1	TSPY153	S. pyogenes	ICE	63671	398370..462040	rplL	MOBP1,profile_MOBT	typeFA	ACTTAACCCCCCGTATCTAACAGGGGGGTACAAATCGACAGGAAACAGTCAAAAAAACATTAGAAAATCCTTTGGTTACAAGGGATTTACAAAATTTCAGCGTATGTCAAATGGGCTTTAAAAGTTGACATAC	2	tet(M); erm(B)	36.67
GCA_020826935.1	TSPY153	S. pyogenes	ICE	64874	397167..462040	rplL	MOBP1,profile_MOBT	typeFATA	ACTTAACCCCCCGTATCTAACAGGGGGGTACAAATCGACAGGAAACAGTCAAAAAAACATTAGAAAATCCTTTGGTTACAAGGGATTTACAAAATTTCAGCGTATGTCAAATGGGCTTTAAAAGTTGACATAC	0		36.65
GCA_020826955.1	TSPY764	S. pyogenes	ICE	17524	1726773..1744296	galM	profile_MOBT	typeFA	GTATGTCAACTTTTAAAGCCCATTTGACATACGCTGAAATTTTGTAAATCCCTTGTAACCAAAGGATTTTCTAATGTTTTTTTGACTGTTTCCTGTCGATTTGTACCCCCCTGTTAGATACGGGGGGTTAAGT	1	tet(M)	38.98
GCA_020826995.1	TSPY1312	S. pyogenes	ICE	22633	567208..589840	tRNA-Ala	profile_MOBT	typeFA	ACTTAACCCCCCGTATCTAACAGGGGGGTACAAATCGACAGGAAACAGTCAAAAAAACATTAGAAAATCCTTTGGTTACAAGGGATTTACAAAATTTCAGCGTATGTAAAATGGGCTTTAAAAGTTGACATAC	2	erm(B); tet(M)	39.16
GCA_020827075.1	TSPY1026	S. pyogenes	ICE	55524	768744..824267	rpmH	profile_MOBT	typeFA	ACTTAACCCCCCGTATCTAACAGGGGGGTACAAATCGACAGGAAACAGTCAAAAAAACATTAGAAAATCCTTTGGTTACAAGGGATTTACAAAATTTCAGCGTATGTCAAATGGGCTTTAAAAGTTGACATAC	2	tet(M); tet(L)	36.38
GCA_020827075.1	TSPY1026	S. pyogenes	ICE	56006	768262..824267	rpmH	profile_MOBT	typeFATA	ACTTAACCCCCCGTATCTAACAGGGGGGTACAAATCGACAGGAAACAGTCAAAAAAACATTAGAAAATCCTTTGGTTACAAGGGATTTACAAAATTTCAGCGTATGTCAAATGGGCTTTAAAAGTTGACATAC	0		36.37
GCA_020827135.1	TSPY270	S. pyogenes	ICE	51372	222142..273513	rplL	MOBP1	typeFATA	NA	3	erm(B); ant(6)-Ia; aph(3')-III	35.71
GCA_016126835.1	emm9ST603	S. pyogenes	ICE	41886	188273..230158	rpmH	profile_MOBT	typeFA	ACTTAACCCCCCGTATCTAACAGGGGGGTACAAATCGACAGGAAACAGTCAAAAAAACATTAGAAAATCCTTTGGTTACAAGGGATTTACAAAATTTCAGCGTATGTCAAATGGGCTTTAAAAGTTGACATAC	1	tet(M)	38.92
GCA_016549335.1	iGAS426	S. pyogenes	ICE	48512	1300825..1349336	rplL	MOBP1	typeFA	NA	0		37.3
GCA_016549335.1	iGAS426	S. pyogenes	ICE	49714	1300825..1350538	rplL	MOBP1	typeFATA	NA	1	tet(M)	37.3
GCA_016549375.1	iGAS391	S. pyogenes	ICE	48512	1300731..1349242	rplL	MOBP1	typeFA	NA	0		37.3
GCA_016549375.1	iGAS391	S. pyogenes	ICE	49714	1300731..1350444	rplL	MOBP1	typeFATA	NA	1	tet(M)	37.3
GCA_016549355.1	iGAS376	S. pyogenes	ICE	48512	1300796..1349307	rplL	MOBP1	typeFA	NA	0		37.3
GCA_016549355.1	iGAS376	S. pyogenes	ICE	49714	1300796..1350509	rplL	MOBP1	typeFATA	NA	1	tet(M)	37.3
GCA_022869745.1		S. pyogenes	ICE	44108	83632..127739	NA	MOBP1,profile_MOBT	typeFATA	GAAAATCCTTTGGTTACAAGGGATTTACAAAATTTCAGCGTATGTCAAATGGGCTTTAAAAGTTGACATAC	1	erm(B)	36.62
GCA_023380045.1	21SPY7071	S. pyogenes	ICE	66073	1115237..1181309	NA	MOBP1	typeFA	GTATGTCAACTTTTAAAGCCCATTTGACATACGCTGAAATTTTGTAAATCCCTTGTAACCAAAGGATTTTCTAATGTTTTTTTGACTGTTTCCTGTCGATTTGTACCCCCCTGTTAGATACGGGGGGTTAAGT	0		37
GCA_023380045.1	21SPY7071	S. pyogenes	ICE	66555	1115237..1181791	rplL	MOBP1	typeFATA	GTATGTCAACTTTTAAAGCCCATTTGACATACGCTGAAATTTTGTAAATCCCTTGTAACCAAAGGATTTTCTAATGTTTTTTTGACTGTTTCCTGTCGATTTGTACCCCCCTGTTAGATACGGGGGGTTAAGT	2	tet(M); erm(B)	36.99
GCA_028215815.1	1095	S. pyogenes	ICE	73277	1066719..1139995	rlmD	MOBP1,MOBQ	typeFATA	NA	1	tet(T)	32.55
GCA_044360885.1	20200554	S. pyogenes	ICE	47723	1623709..1671431	rplL	MOBP1,profile_MOBT	typeFATA	ACTTAACCCCCCGTATCTAACAGGGGGGTACAAATCGACAGGAAACAGTCAAAAAAACATTAGAAAATCCTTTGGTTACAAGGGATTTACAAAATTTCAGCGTATGTCAAATGGGCTTTAAAAGTTGACATAC	1	erm(B)	33.23
GCA_044360945.1	20203206	S. pyogenes	ICE	47723	1623657..1671379	rplL	MOBP1,profile_MOBT	typeFATA	ACTTAACCCCCCGTATCTAACAGGGGGGTACAAATCGACAGGAAACAGTCAAAAAAACATTAGAAAATCCTTTGGTTACAAGGGATTTACAAAATTTCAGCGTATGTCAAATGGGCTTTAAAAGTTGACATAC	1	erm(B)	33.23
GCA_044361035.1	20192362	S. pyogenes	ICE	47722	1584032..1631753	rplL	MOBP1,profile_MOBT	typeFATA	ACTTAACCCCCCGTATCTAACAGGGGGGTACAAATCGACAGGAAACAGTCAAAAAAACATTAGAAAATCCTTTGGTTACAAGGGATTTACAAAATTTCAGCGTATGTCAAATGGGCTTTAAAAGTTGACATAC	1	erm(B)	33.23
GCA_044361245.1	20185322	S. pyogenes	ICE	47723	1580245..1627967	rplL	MOBP1	typeFATA	ACTTAACCCCCCGTATCTAACAGGGGGGTACAAATCGACAGGAAACAGTCAAAAAAACATTAGAAAATCCTTTGGTTACAAGGGATTTACAAAATTTCAGCGTATGTCAAATGGGCTTTAAAAGTTGACATAC	1	erm(B)	33.23
GCA_029280505.1	1039	S. pyogenes	ICE	72086	470297..542382	NA	MOBQ,MOBP1	typeFATA	NA	1	tet(T)	32.55
GCA_029280565.1	1042	S. pyogenes	ICE	72536	1066687..1139222	rlmD	MOBP1,MOBQ	typeFATA	NA	1	tet(T)	32.57
GCA_029280585.1	1133	S. pyogenes	ICE	72537	499619..572155	rlmD	MOBP1,MOBQ	typeFATA	NA	1	tet(T)	32.57
GCA_029323775.1	1004	S. pyogenes	ICE	73277	1054465..1127741	rlmD	MOBP1,MOBQ	typeFATA	NA	1	tet(T)	32.55
GCA_036347555.1	Spyo01	S. pyogenes	ICE	29574	889959..919532	NA	profile_MOBT	typeFA	GCCCCCTCTATCTAACAGGGGGG	1	tet(M)	36.66
GCA_036347595.1	Spyo09	S. pyogenes	ICE	29574	889959..919532	NA	profile_MOBT	typeFA	GCCCCCTCTATCTAACAGGGGGG	1	tet(M)	36.66
GCA_035918435.1	SS1445	S. pyogenes	ICE	17524	1774072..1791595	galM	profile_MOBT	typeFA	ACTTAACCCCCCGTATCTAACAGGGGGGTACAAATCGACAGGAAACAGTCAAAAAAACATTAGAAAATCCTTTGGTTACAAGGGATTTACAAAATTTCAGCGTATGTCAAATGGGCTTTAAAAGTTGACATAC	1	tet(M)	38.98
GCA_035918475.1	2907-97	S. pyogenes	ICE	19389	1642276..1661664	tRNA-Lys	profile_MOBT	typeFA	ACTTAACCCCCCGTATCTAACAGGGGGGTACAAATCGACAGGAAACAGTCAAAAAAACATTAGAAAATCCTTTGGTTACAAGGGATTTACAAAATTTCAGCGTATGTCAAATGGGCTTTAAAAGTTGACATAC	1	tet(M)	38.12
GCA_045345455.1	EMM113	S. pyogenes	ICE	51943	1037764..1089706	rplL	MOBP1	typeFATA	NA	1	erm(A)	32.56
GCA_039619335.1	318231	S. pyogenes	ICE	56105	995674..1051778	NA	MOBT,MOBP1	typeFATA	NA	4	tet(M); erm(B); aph(3')-III; ant(6)-Ia	35.66
GCA_041071735.1	8373/17	S. pyogenes	ICE	135608	1139687..1275294	NA	MOBP1,MOBV,MOBQ	typeFATA	NA	2	tet(O); erm(A)	34.38
GCA_041072535.1	1966/14	S. pyogenes	ICE	48351	1121332..1169682	rplL	MOBP1	typeFATA	NA	1	erm(A)	32.47
GCA_041072725.1	Nov-06	S. pyogenes	ICE	62393	1666643..1729035	rplL	profile_MOBT,MOBP1	typeFA	GTATGTCAACTTTTAAAGCCCATTTGACATACGCTGAAATTTTGTAAATCCCTTGTAACCAAAGGATTTTCTAATGTTTTTTTGACTGTTTCCTGTCGATTTGTACCCCCCTGTTAGATACGGGGGGTTAAGT	2	erm(B); tet(M)	36.62
GCA_041072725.1	Nov-06	S. pyogenes	ICE	106957	1103906..1210862	NA	MOBP1,MOBV,MOBQ	typeFATA	NA	2	tet(O); erm(A)	35.1
GCA_041072725.1	Nov-06	S. pyogenes	ICE	89143	1641096..1730238	rplL	profile_MOBT,MOBP1	typeFATA	GTATGTCAACTTTTAAAGCCCATTTGACATACGCTGAAATTTTGTAAATCCCTTGTAACCAAAGGATTTTCTAATGTTTTTTTGACTGTTTCCTGTCGATTTGTACCCCCCTGTTAGATACGGGGGGTTAAGT	0		37.6
GCA_041072835.1	1510/08	S. pyogenes	ICE	106957	1103865..1210821	NA	MOBP1,MOBV,MOBQ	typeFATA	NA	2	tet(O); erm(A)	35.1
GCA_041073745.1	997/08	S. pyogenes	ICE	106957	1103897..1210853	NA	MOBP1,MOBV,MOBQ	typeFATA	NA	2	tet(O); erm(A)	35.09
GCA_041074175.1	1851/03	S. pyogenes	ICE	70606	1062807..1133412	NA	MOBP1,MOBV,MOBQ	typeFATA	NA	2	tet(O); erm(A)	36.87
GCA_041430855.1	Isolate 27	S. pyogenes	ICE	69906	1068161..1138066	NA	profile_MOBT,MOBP1	typeFA	NA	0		NA
GCA_041430855.1	Isolate 27	S. pyogenes	ICE	70388	1068161..1138548	NA	profile_MOBT,MOBP1	typeFATA	NA	0		NA
GCA_041430915.1	Isolate 18	S. pyogenes	ICE	69906	1068161..1138066	NA	profile_MOBT,MOBP1	typeFA	NA	0		NA
GCA_041430915.1	Isolate 18	S. pyogenes	ICE	70388	1068161..1138548	NA	profile_MOBT,MOBP1	typeFATA	NA	0		NA
GCA_900474835.1	NCTC12069	S. pyogenes	ICE	28628	870114..898741	NA	profile_MOBT	typeFA	CCCCCCTGTTAGGTAGAGGGGGC	1	tet(M)	36.39
GCA_900474845.1	NCTC12057	S. pyogenes	ICE	57439	1074763..1132201	rplL	MOBP1,MOBV	typeFATA	NA	1	tet(O)	38.2
GCA_900474925.1	NCTC12050	S. pyogenes	ICE	26948	1819811..1846758	tRNA-Asn	profile_MOBT	typeFA	GTATGTCAACTTTTAAAGCCCATTTGACATACGCTGAAATTTTGTAAATCCCTTGTAACCAAAGGATTTTCTAATGTTTTTTTGACTGTTTCCTGTCGATTTGTACCCCCCTGTTAGATACGGGGGGGTAAGT	1	tet(M)	37.49
GCA_900474925.1	NCTC12050	S. pyogenes	ICE	52890	691282..744171	rplL	MOBP1	typeFATA	NA	0		36.09
GCA_900475495.1	NCTC13742	S. pyogenes	ICE	63120	1105417..1168536	NA	MOBP1,MOBV,MOBQ	typeFATA	NA	1	tet(O)	37.75
GCA_900475705.1	NCTC13744	S. pyogenes	ICE	17527	1540124..1557650	rpmH	profile_MOBT	typeFA	ACTTAACCCCCCGTATCTAACAGGGGGGTACAAATCGACAGGAAACAGTCAAAAAAACATTAGAAAATCCTTTGGTTACAAGGGATTTACAAAATTTCAGCGTATGTCAAATGGGCTTTAAAAGTTGACATAC	1	tet(M)	39.01
GCA_900475765.1	NCTC13736	S. pyogenes	ICE	54286	1203314..1257599	rplL	profile_MOBT	typeFA	GTATGTCAACTTTTAAAGCCCATTTGACATACGCTGAAATTTTGTAAATCCCTTGTAACCAAAGGATTTTCTAATGTTTTTTTGACTGTTTCCTGTCGATTTGTACCCCCCTGTTAGATACGGGGGGTTAAGT	0		37.51
GCA_900475765.1	NCTC13736	S. pyogenes	ICE	54768	1203314..1258081	rplL	profile_MOBT	typeFATA	GTATGTCAACTTTTAAAGCCCATTTGACATACGCTGAAATTTTGTAAATCCCTTGTAACCAAAGGATTTTCTAATGTTTTTTTGACTGTTTCCTGTCGATTTGTACCCCCCTGTTAGATACGGGGGGTTAAGT	1	tet(M)	37.49
GCA_900475875.1	NCTC13737	S. pyogenes	ICE	66230	722111..788340	rplL	MOBP1,profile_MOBT	typeFA	ACTTAACCCCCCGTATCTAACAGGGGGGTACAAATCGACAGGAAACAGTCAAAAAAACATTAGAAAATCCTTTGGTTACAAGGGATTTACAAAATTTCAGCGTATGTCAAATGGGCTTTAAAAGTTGACATAC	2	tet(M); tet(L)	36.83
GCA_900475875.1	NCTC13737	S. pyogenes	ICE	66712	721629..788340	rplL	MOBP1,profile_MOBT	typeFATA	ACTTAACCCCCCGTATCTAACAGGGGGGTACAAATCGACAGGAAACAGTCAAAAAAACATTAGAAAATCCTTTGGTTACAAGGGATTTACAAAATTTCAGCGTATGTCAAATGGGCTTTAAAAGTTGACATAC	0		36.83
GCA_900474945.1	NCTC8316	S. pyogenes	ICE	42162	805566..847727	rplL	MOBP1	typeFATA	NA	0		37.69
GCA_019334785.1	LPB0404	S. rubneri	ICE	17527	1828461..1845987	rpmH	profile_MOBT	typeFA	GTATGTCAACTTTTAAAGCCCATTTGACATACGCTGAAATTTTGTAAATCCCTTGTAACCAAAGGATTTTCTAATGTTTTTTTGACTGTTTCCTGTCGATTTGTACCCCCCTGTTAGATACGGGGGGTTAAGT	1	tet(M)	39.12
GCA_003609975.1	GUT187T	S. ruminantium	ICE	56376	935107..991482	rplL	MOBP1	typeFATA	NA	0		35.82
GCA_021654515.1	GUT-183	S. ruminantium	ICE	83388	1216669..1300056	rplL	MOBP1	typeFATA	NA	3	ant(6)-Ia; erm(B); tet(O)	37.01
GCA_021654535.1	GUT-184	S. ruminantium	ICE	34658	253900..288557	rplL	profile_MOBT,MOBV,firmi_Rep_2	typeFA	GTATGTCAACTTTTAAAGCCCATTTGACATACGCTGAAATTTTGTAAATCCCTTGTAACCAAAGGATTTTCTAATGTTTTTTTGACTGTTTCCTGTCGATTTGTACCCCCCTGTTAGATACGGGGGGTTAAGT	1	tet(M)	38.85
GCA_021654535.1	GUT-184	S. ruminantium	ICE	46019	1197922..1243940	rplL	MOBP1	typeFATA	NA	0		37.85
GCA_021654555.1	GUT-189	S. ruminantium	ICE	85154	1147385..1232538	rplL	MOBP1	typeFATA	NA	3	ant(6)-Ia; erm(B); tet(O)	36.97
GCA_009738205.1	ICDC1	S. salivarius	ICE	49478	1384623..1434100	rplL	profile_MOBT,MOBP1	typeFATA	GTATGTCAACTTTTAAAGCCCATTTGACATACGCTGAAATTTTGTAAATCCCTTGTAACCAAAGGATTTTCTAATGTTTTTTTGACTGTTTCCTGTCGATTTGTACCCCCCTGTTAGATACGGGGGGTTAAGT	1	erm(B)	33.32
GCA_009738245.1	ICDC3	S. salivarius	ICE	49478	1384647..1434124	rplL	profile_MOBT,MOBP1	typeFATA	GTATGTCAACTTTTAAAGCCCATTTGACATACGCTGAAATTTTGTAAATCCCTTGTAACCAAAGGATTTTCTAATGTTTTTTTGACTGTTTCCTGTCGATTTGTACCCCCCTGTTAGATACGGGGGGTTAAGT	1	erm(B)	33.32
GCA_002073835.2	FDAARGOS_259	S. salivarius	ICE	22795	1792338..1815132	rpmH	profile_MOBT	typeFA	ACTTAACCCCCCGTATCTAACAGGGGGGTACAAATCGACAGGAAACAGTCAAAAAAACATTAGAAAATCCTTTGGTTACAAGGGATTTACAAAATTTCAGCGTATGTCAAATGGGCTTTAAAAGTTGACATAC	2	tet(M); erm(B)	37.86
GCA_008305695.1	LAB813	S. salivarius	ICE	54582	385672..440253	NA	profile_MOBT,MOBP1	typeFA	ACCTAACCCCCCGTATCTAACAGGGGGGTACAAATCGACAGGAAACAGTCAAAAAAATAGCAGAAAATTCTTTGGTTACAAGGAGTTTAGAAAATTTCGTGGTATGTCAAATGAGCTTCAATAGTTGACATAC	0		38.17
GCA_008305695.1	LAB813	S. salivarius	ICE	52226	388028..440253	NA	profile_MOBT,MOBP1	typeFATA	NA	1	tet(M)	38.06
GCA_046531505.1	KSS2	S. salivarius	ICE	22795	775323..798117	rpmH	profile_MOBT	typeFA	ACTTAACCCCCCGTATCTAACAGGGGGGTACAAATCGACAGGAAACAGTCAAAAAAACATTAGAAAATCCTTTGGTTACAAGGGATTTACAAAATTTCAGCGTATGTCAAATGGGCTTTAAAAGTTGACATAC	2	tet(M); erm(B)	37.84
GCA_046531395.1	KSS3	S. salivarius	ICE	22795	1350323..1373117	rplL	profile_MOBT	typeFA	GTATGTCAACTTTTAAAGCCCATTTGACATACGCTGAAATTTTGTAAATCCCTTGTAACCAAAGGATTTTCTAATGTTTTTTTGACTGTTTCCTGTCGATTTGTACCCCCCTGTTAGATACGGGGGGTTAAGT	2	erm(B); tet(M)	37.84
GCA_046531525.1	KSS6	S. salivarius	ICE	22616	1339564..1362179	rpmH	profile_MOBT	typeFA	ACTTAACCCCCCGTATCTAACAGGGGGGTACAAATCGACAGGAAACAGTCAAAAAAACATTAGAAAATCCTTTGGTTACAAGGGATTTACAAAATTTCAGCGTATGTCAAATGGGCTTTAAAAGTTGACATAC	2	tet(M); erm(B)	37.87
GCA_046531535.1	KSS7	S. salivarius	ICE	34695	415898..450592	NA	profile_MOBT	typeFA	ACCTAACCCCCCGTATCTAACAGGGGGGTACAAATCGACAGGAAACAGTCAAAAAAATAGCAGAAAATTCTTTGGTTACAAGGAGTTTAGAAAATTTCGTGGTATGTCAAATGAGCTTCAATAGTTGACATAC	1	tet(M)	38.95
GCA_046531615.1	KSS12	S. salivarius	ICE	22616	1339727..1362342	rpmH	profile_MOBT	typeFA	ACTTAACCCCCCGTATCTAACAGGGGGGTACAAATCGACAGGAAACAGTCAAAAAAACATTAGAAAATCCTTTGGTTACAAGGGATTTACAAAATTTCAGCGTATGTCAAATGGGCTTTAAAAGTTGACATAC	2	tet(M); erm(B)	37.87
GCA_050221725.1	BCC16R	S. sanguinis	ICE	17523	223888..241410	rpmH	profile_MOBT	typeFA	ACTTAACCCCCCGTATCTAACAGGGGGGTACAAATCGACAGGAAACAGTCAAAAAAACATTAGAAAATCCTTTGGTTACAAGGGATTTACAAAATTTCAGCGTATGTCAAATGGGCTTTAAAAGTTGACATAC	1	tet(M)	38.99
GCA_050221725.1	BCC16R	S. sanguinis	ICE	41259	915048..956306	rplL	MOBP1	typeFATA	NA	0		34.23
GCA_050223295.1	SK1056R	S. sanguinis	ICE	54798	1147512..1202309	rplL	MOBP1	typeFATA	NA	2	mef(A); msr(D)	39.18
GCA_050223405.1	SK678R	S. sanguinis	ICE	28056	369984..398039	tRNA-Leu	MOBP1	typeFATA	AAGGGGCTTGGGGATTTCCCCAA	0		39.55
GCA_050223855.1	SK408R	S. sanguinis	ICE	62759	1116352..1179110	rplL	profile_MOBT,MOBP1	typeFA	ACTTAACCCCCCGTATCTAACAGGGGGGTACAAATCGACAGGAAACAGTCAAAAAAACATTAGAAAATCCTTTGGTTACAAGGGATTTACAAAATTTCAGCGTATGTCAAATGGGCTTTAAAAGTTGACATAC	1	tet(M)	34.64
GCA_050223855.1	SK408R	S. sanguinis	ICE	70708	1108403..1179110	rplL	profile_MOBT,MOBP1	typeFATA	ACTTAACCCCCCGTATCTAACAGGGGGGTACAAATCGACAGGAAACAGTCAAAAAAACATTAGAAAATCCTTTGGTTACAAGGGATTTACAAAATTTCAGCGTATGTCAAATGGGCTTTAAAAGTTGACATAC	0		34.64
GCA_050224935.1	SK340R	S. sanguinis	ICE	22251	158823..181073	rplL	MOBP1	typeFATA	AGGGGCTTGGGGATTTCCCCAA	0		39.3
GCA_050225895.1	SK49R	S. sanguinis	ICE	43768	900713..944480	NA	MOBT,MOBP1	typeFATA	NA	0		35.14
GCA_050225895.1	SK49R	S. sanguinis	ICE	23355	1962726..1986080	rplL	MOBP1	typeFATA	TTGGGGAAATCCCCAAGCCCCT	0		41.41
GCA_050228515.1	SK72R	S. sanguinis	ICE	25675	1987422..2013096	tRNA-Leu	MOBP1	typeFATA	TTGGGGAAATCCCCAAGCCCCT	0		42.44
GCA_050228625.1	BCC39R	S. sanguinis	ICE	47559	1216923..1264481	rplL	profile_MOBT,MOBP1	typeFA	GTATGTCAACTTTTAAAGCCCATTTGACATACGCTGAAATTTTGTAAATCCCTTGTAACCAAAGGATTTTCTAATGTTTTTTTGACTGTTTCCTGTCGATTTGTACCCCCCTGTTAGATACGGGGGGTTAAGT	0		34.24
GCA_050228625.1	BCC39R	S. sanguinis	ICE	82919	1216923..1299841	rplL	profile_MOBT,MOBP1	typeFATA	GTATGTCAACTTTTAAAGCCCATTTGACATACGCTGAAATTTTGTAAATCCCTTGTAACCAAAGGATTTTCTAATGTTTTTTTGACTGTTTCCTGTCGATTTGTACCCCCCTGTTAGATACGGGGGGTTAAGT	2	erm(B); tet(M)	34.34
GCA_050230025.1	BCC37R	S. sanguinis	ICE	22135	2335164..2357298	rplL	MOBP1	typeFATA	TTGGGGAAATCCCCAAGCCCCT	0		39.44
GCA_050230805.1	BCC28R	S. sanguinis	ICE	22135	2335163..2357297	rplL	MOBP1	typeFATA	TTGGGGAAATCCCCAAGCCCCT	0		39.44
GCA_050230955.1	BCC04R	S. sanguinis	ICE	40724	1236921..1277644	rplL	MOBP1	typeFATA	NA	0		34.31
GCA_050234405.1	SK115R	S. sanguinis	ICE	17524	118956..136479	galM	profile_MOBT	typeFA	GTATGTCAACTTTTAAAGCCCATTTGACATACGCTGAAATTTTGTAAATCCCTTGTAACCAAAGGATTTTCTAATGTTTTTTTGACTGTTTCCTGTCGATTTGTACCCCCCTGTTAGATACGGGGGGTTAAGT	1	tet(M)	39.01
GCA_050234945.1	BCC54R	S. sanguinis	ICE	482248	1593147..2075394	tRNA-Ser	MOBP1	typeFATA	NA	0		44.11
GCA_050234945.1	BCC54R	S. sanguinis	ICE	22034	2422814..2444847	rplL	MOBP1	typeFATA	TTGGGGAAATCCCCAAGCCCCT	0		42.05
GCA_900635155.1	NCTC 10904	S. sanguinis	ICE	26528	1116130..1142657	rplL	MOBP1	typeFATA	AAGGGGCTTGGGGATTTCCCCAA	0		39.15
GCA_900475045.1	NCTC11085	S. sanguinis	ICE	22251	158823..181073	rplL	MOBP1	typeFATA	AGGGGCTTGGGGATTTCCCCAA	0		39.3
GCA_014192345.1	DAT299	S. suis	ICE	66784	971810..1038593	NA	MOBV,MOBP1	typeFATA	NA	1	tet(O)	41.09
GCA_014192525.1	DAT300	S. suis	ICE	75454	937062..1012515	NA	MOBV,MOBP1	typeFATA	CACGACTTTGCGAAGCAAAGTGTAGTGTGTTATAC	2	tet(O); ant(6)-Ia	38.27
GCA_014192525.1	DAT300	S. suis	ICE	53388	1335234..1388621	NA	MOBP1,MOBV	typeFATA	NA	1	catP	36.11
GCA_014192525.1	DAT300	S. suis	ICE	24714	1147494..1172207	rplL	MOBP1	typeFATA	NA	0		41.52
GCA_000014305.1	05ZYH33	S. suis	ICE	83916	873011..956926	rplL	MOBP1,profile_MOBT	typeFA	GTATGTCAACTTTTAAAGCCCATTTGACATACGCTGAAATTTTGTAAATCCCTTGTAACCAAAGGATTTTCTAATGTTTTTTTGACTGTTTCCTGTCGATTTGTACCCCCCTGTTAGATACGGGGGGTTAAGT	0		36.62
GCA_000014305.1	05ZYH33	S. suis	ICE	86133	873011..959143	rplL	MOBP1,profile_MOBT	typeFATA	GTATGTCAACTTTTAAAGCCCATTTGACATACGCTGAAATTTTGTAAATCCCTTGTAACCAAAGGATTTTCTAATGTTTTTTTGACTGTTTCCTGTCGATTTGTACCCCCCTGTTAGATACGGGGGGTTAAGT	2	tet(M); ant(6)-Ia	36.69
GCA_000014325.1	98HAH33	S. suis	ICE	53416	872732..926147	rplL	MOBP1,profile_MOBT	typeFA	GTATGTCAACTTTTAAAGCCCATTTGACATACGCTGAAATTTTGTAAATCCCTTGTAACCAAAGGATTTTCTAATGTTTTTTTGACTGTTTCCTGTCGATTTGTACCCCCCTGTTAGATACGGGGGGTTAAGT	0		35.21
GCA_000014325.1	98HAH33	S. suis	ICE	86114	872732..958845	rplL	MOBP1,profile_MOBT	typeFATA	GTATGTCAACTTTTAAAGCCCATTTGACATACGCTGAAATTTTGTAAATCCCTTGTAACCAAAGGATTTTCTAATGTTTTTTTGACTGTTTCCTGTCGATTTGTACCCCCCTGTTAGATACGGGGGGTTAAGT	2	tet(M); ant(6)-Ia	36.7
GCA_000168355.3	05HAS68	S. suis	ICE	126443	1177173..1303615	NA	MOBV,MOBP1	typeFATA	NA	1	tet(O)	38.87
GCA_000186405.1	JS14	S. suis	ICE	65401	591084..656484	rlmD	MOBP1	typeFATA	NA	2	tet(O); tet(40)	38.66
GCA_000231865.1	SS12	S. suis	ICE	99328	835566..934893	NA	firmi_Viral_Rep_B1,MOBP1,MOBV	typeFATA	NA	2	erm(B); tet(O)	37.74
GCA_000231885.1	D9	S. suis	ICE	128175	1017839..1146013	zmpC	MOBP1,MOBV	typeFATA	NA	2	erm(B); tet(O)	38.84
GCA_000231905.1	D12	S. suis	ICE	57001	1291329..1348329	NA	MOBP1,MOBV	typeFATA	CTATACTTTATATTCATAAAGTG	1	tet(O)	38.18
GCA_000231905.1	D12	S. suis	ICE	24843	1026990..1051832	rplL	MOBP1	typeFATA	NA	0		41.41
GCA_000344765.1	SC070731	S. suis	ICE	78850	581652..660501	NA	MOBV,MOBP1	typeFATA	NA	2	tet(O); tet(40)	38.31
GCA_000390245.1	TL13	S. suis	ICE	17868	587666..605533	smpB	profile_MOBT	typeFA	TTAACCCCCCGTATCTAACAGGGGGGTACAAATCGACAGGAAACAGTCAAAAAAACATTAGAAAATCCTTTGGTTACAAGGGATTTACAAAATTTCAGCGTATGTAAAATGGGCTTTAAAAGTTGACATAC	1	tet(M)	38.96
GCA_000494895.1	T15	S. suis	ICE	177995	908051..1086045	rbgA	MOBQ,MOBP1	typeFATA	NA	0		37.34
GCA_000993745.1	ZY05719	S. suis	ICE	121981	834587..956567	rplL	firmi_Viral_Rep_B1,MOBP1,profile_MOBT	typeFA	GTATGTCAACTTTTAAAGCCCATTTGACATACGCTGAAATTTTGTAAATCCCTTGTAACCAAAGGATTTTCTAATGTTTTTTTGACTGTTTCCTGTCGATTTGTACCCCCCTGTTAGATACGGGGGGTTAAGT	0		36.83
GCA_000993745.1	ZY05719	S. suis	ICE	124198	834587..958784	rplL	firmi_Viral_Rep_B1,MOBP1,profile_MOBT	typeFATA	GTATGTCAACTTTTAAAGCCCATTTGACATACGCTGAAATTTTGTAAATCCCTTGTAACCAAAGGATTTTCTAATGTTTTTTTGACTGTTTCCTGTCGATTTGTACCCCCCTGTTAGATACGGGGGGTTAAGT	2	tet(M); ant(6)-Ia	36.87
GCA_001610935.1	90-1330	S. suis	ICE	92558	1914638..2007195	rplL	MOBP1	typeFATA	NA	0		36.42
GCA_001610935.1	90-1330	S. suis	ICE	19765	2028607..2048371	NA		typeFATA	NA	0		39.74
GCA_001572685.1	NSUI060	S. suis	ICE	73992	952258..1026249	NA	MOBP1,MOBV	typeFATA	NA	1	tet(O)	39.86
GCA_001572685.1	NSUI060	S. suis	ICE	30475	1300489..1330963	rplL	MOBP1	typeFATA	TTGGGGAATATCCCCAAGCCCCTAAG	1	erm(B)	38.67
GCA_001640765.1	DN13	S. suis	ICE	24392	1101664..1126055	rplL	MOBP1	typeFATA	NA	0		41.52
GCA_002189695.1	LSM102	S. suis	ICE	88197	843667..931863	rplL	MOBP1,profile_MOBT	typeFATA	GTATGTCAACTTTTAAAGCCCATTTGACATACGCTGAAATTTTGTAAATCCCTTGTAACCAAAGGATTTTCTAATGTTTTTTTGACTGTTTCCTGTCGATTTGTACCCCCCTGTTAGATACGGGGGGTTAAGT	1	tet(M)	38.26
GCA_002285535.1		S. suis	ICE	19042	317357..336398	rplL	profile_MOBT	typeFA	GTATGTCAACTTTTAAAGCCCATTTGACATACGCTGAAATTTTGTAAATCCCTTGTAACCAAAGGATTTTCTAATGTTTTTTTGACTGTTTCCTGTCGATTTGTACCCCCCTGTTAGATACGGGGGGTTAAGT	1	tet(M)	39.09
GCA_002285535.1		S. suis	ICE	16461	986594..1003054	NA		typeFATA	NA	0		39.12
GCA_001721625.1	GZ0565	S. suis	ICE	24392	1078281..1102672	rplL	MOBP1	typeFATA	NA	0		41.52
GCA_003285225.1	0061	S. suis	ICE	17526	788138..805663	rpmH	profile_MOBT	typeFA	ACTTAACCCCCCGTATCTAACAGGGGGGTACAAATCGACAGGAAACAGTCAAAAAAACATTAGAAAATCCTTTGGTTACAAGGGATTTACAAAATTTCAGCGTATGTCAAATGGGCTTTAAAAGTTGACATAC	1	tet(M)	39.15
GCA_003285245.1	1081	S. suis	ICE	17526	828420..845945	rpmH	profile_MOBT	typeFA	ACTTAACCCCCCGTATCTAACAGGGGGGTACAAATCGACAGGAAACAGTCAAAAAAACATTAGAAAATCCTTTGGTTACAAGGGATTTACAAAATTTCAGCGTATGTCAAATGGGCTTTAAAAGTTGACATAC	1	tet(M)	39.15
GCA_025349925.1	ISU2912	S. suis	ICE	69555	1123114..1192668	rplL	MOBP1,MOBV	typeFATA	NA	2	erm(B); tet(O)	38.59
GCA_001936415.1	SS2-1	S. suis	ICE	121982	810967..932948	McrC	firmi_Viral_Rep_B1,MOBP1,profile_MOBT	typeFA	GTATGTCAACTTTTAAAGCCCATTTGACATACGCTGAAATTTTGTAAATCCCTTGTAACCAAAGGATTTTCTAATGTTTTTTTGACTGTTTCCTGTCGATTTGTACCCCCCTGTTAGATACGGGGGGTTAAGT	0		36.83
GCA_001936415.1	SS2-1	S. suis	ICE	124199	810967..935165	rplL	firmi_Viral_Rep_B1,MOBP1,profile_MOBT	typeFATA	GTATGTCAACTTTTAAAGCCCATTTGACATACGCTGAAATTTTGTAAATCCCTTGTAACCAAAGGATTTTCTAATGTTTTTTTGACTGTTTCCTGTCGATTTGTACCCCCCTGTTAGATACGGGGGGTTAAGT	2	tet(M); ant(6)-Ia	36.87
GCA_002111405.1	SC19	S. suis	ICE	121981	834762..956742	McrC	firmi_Viral_Rep_B1,MOBP1,profile_MOBT	typeFA	GTATGTCAACTTTTAAAGCCCATTTGACATACGCTGAAATTTTGTAAATCCCTTGTAACCAAAGGATTTTCTAATGTTTTTTTGACTGTTTCCTGTCGATTTGTACCCCCCTGTTAGATACGGGGGGTTAAGT	0		36.83
GCA_002111405.1	SC19	S. suis	ICE	124198	834762..958959	rplL	firmi_Viral_Rep_B1,MOBP1,profile_MOBT	typeFATA	GTATGTCAACTTTTAAAGCCCATTTGACATACGCTGAAATTTTGTAAATCCCTTGTAACCAAAGGATTTTCTAATGTTTTTTTGACTGTTTCCTGTCGATTTGTACCCCCCTGTTAGATACGGGGGGTTAAGT	2	tet(M); ant(6)-Ia	36.87
GCA_002688665.1	CS100322	S. suis	ICE	63954	636521..700474	NA	MOBV,MOBP1	typeFATA	NA	5	aph(3')-III; ant(6)-Ia; erm(B); tet(O); tet(40)	40.43
GCA_002736265.1	HA0609	S. suis	ICE	136671	999671..1136341	rplL	MOBP1,MOBV	typeFATA	NA	1	tet(O)	38.75
GCA_002803825.1	CZ130302	S. suis	ICE	95221	1263744..1358964	rplL	MOBP1,MOBV	typeFATA	NA	3	aph(3')-III; tet(O); erm(B)	38.32
GCA_002812525.1	AH681	S. suis	ICE	99383	1179290..1278672	rplL	MOBP1,MOBV	typeFATA	NA	2	tet(O); erm(B)	39.12
GCA_002831545.1	HN136	S. suis	ICE	74479	1116618..1191096	NA	MOBV,MOBP1	typeFATA	NA	3	erm(B); aph(3')-III; tet(O)	38.22
GCA_002831545.1	HN136	S. suis	ICE	97817	1224392..1322208	NA	MOBP1,MOBV	typeFATA	NA	2	tet(O); erm(B)	38.69
GCA_003144175.1	HN105	S. suis	ICE	92166	954074..1046239	NA	MOBV,MOBP1	typeFATA	NA	4	erm(B); aph(3')-III; tet(O); ant(6)-Ia	38.9
GCA_002285735.2	ISU2812	S. suis	ICE	119727	1249921..1369647	NA	MOBP1,MOBV	typeFATA	NA	2	erm(B); tet(O)	39.42
GCA_002285735.2	ISU2812	S. suis	ICE	36037	2373711..2409747	rplL	MOBP1	typeFATA	NA	0		43.63
GCA_013488085.1	ISU1606	S. suis	ICE	101880	835090..936969	NA	firmi_Viral_Rep_B1,MOBP1,MOBV	typeFATA	NA	2	tet(O/32/O); erm(B)	38.02
GCA_013488105.1	ISU2514	S. suis	ICE	73992	950407..1024398	NA	MOBP1,MOBV	typeFATA	NA	1	tet(O)	39.85
GCA_013488105.1	ISU2514	S. suis	ICE	29591	1300261..1329851	rplL		typeFATA	TTGGGGAATATCCCCAAGCCCCTAAG	1	erm(B)	38.7
GCA_013488125.1	ISU2714	S. suis	ICE	62135	579826..641960	NA	MOBV,MOBP1	typeFATA	NA	2	erm(B); tet(O)	39.71
GCA_013488145.1	ISU2414	S. suis	ICE	134337	1180396..1314732	NA	MOBV,MOBP1	typeFATA	NA	1	tet(O)	38.75
GCA_003352225.1	SH1510	S. suis	ICE	110393	1013115..1123507	NA	MOBP1	typeFATA	NA	2	tet(O); erm(B)	38.61
GCA_003352225.1	SH1510	S. suis	ICE	67190	1789057..1856246	rplL	MOBP1	typeFATA	NA	0		36.86
GCA_003352205.1	HA1003	S. suis	ICE	17527	1425638..1443164	rpmH	profile_MOBT	typeFA	ACTTAACCCCCCGTATCTAACAGGGGGGTACAAATCGACAGGAAACAGTCAAAAAAACATTAGAAAATCCTTTGGTTACAAGGGATTTACAAAATTTCAGCGTATGTCAAATGGGCTTTAAAAGTTGACATAC	1	tet(M)	39.05
GCA_013488165.1	ISU2614	S. suis	ICE	81734	942807..1024540	rplL	MOBP1,MOBV	typeFATA	NA	2	erm(B); tet(O)	38.96
GCA_013488185.1	ISU2660	S. suis	ICE	140879	974279..1115157	rplL	MOBP1,MOBV	typeFATA	NA	1	tet(O)	37.73
GCA_022354845.1	SFJ44	S. suis	ICE	35179	979597..1014775	NA		typeFA	GCCCCCTCTATCTAACAGGGGGG	2	tetA(P); tet(M)	37.17
GCA_015291825.1	YSJ17	S. suis	ICE	69801	1175150..1244950	rplL	MOBP1	typeFATA	NA	4	tet(O/W/32/O); ant(6)-Ia; aph(3')-III; erm(B)	38.6
GCA_004843685.1	WUSS351	S. suis	ICE	77324	1008345..1085668	rplL		typeFATA	NA	2	erm(B); tet(O)	37.46
GCA_014874555.1	LSM178	S. suis	ICE	96945	931589..1028533	rplL	profile_MOBT,MOBP1	typeFA	ACTTAACCCCCCGTATCTAACAGGGGGGTACAAATCGACAGGAAACAGTCAAAAAAACATTAGAAAATCCTTTGGTTACAAGGGATTTACAAAATTTCAGCGTATGTCAAATGGGCTTTAAAAGTTGACATAC	3	ant(6)-Ia; erm(B); tet(M)	37.94
GCA_014874555.1	LSM178	S. suis	ICE	99162	929372..1028533	rplL	profile_MOBT,MOBP1	typeFATA	ACTTAACCCCCCGTATCTAACAGGGGGGTACAAATCGACAGGAAACAGTCAAAAAAACATTAGAAAATCCTTTGGTTACAAGGGATTTACAAAATTTCAGCGTATGTCAAATGGGCTTTAAAAGTTGACATAC	0		37.97
GCA_014843055.1	16085/3b	S. suis	ICE	55058	1290873..1345930	rplL	MOBP1	typeFATA	NA	0		37.28
GCA_014843055.1	16085/3b	S. suis	ICE	88352	1178790..1267141	NA	MOBV,MOBP1	typeFATA	NA	2	tet(O); erm(B)	39.95
GCA_014843075.1	13-00283-02	S. suis	ICE	72917	211317..284233	smpB	profile_MOBT,MOBP1	typeFA	TTAACCCCCCGTATCTAACAGGGGGGTACAAATCGACAGGAAACAGTCAAAAAAACATTAGAAAATCCTTTGGTTACAAGGGATTTACAAAATTTCAGCGTATGTAAAATGGGCTTTAAAAGTTGACATAC	1	tet(M)	37.79
GCA_014843075.1	13-00283-02	S. suis	ICE	75134	209100..284233	smpB	profile_MOBT,MOBP1	typeFATA	TTAACCCCCCGTATCTAACAGGGGGGTACAAATCGACAGGAAACAGTCAAAAAAACATTAGAAAATCCTTTGGTTACAAGGGATTTACAAAATTTCAGCGTATGTAAAATGGGCTTTAAAAGTTGACATAC	0		37.83
GCA_015908885.1	YZDH1	S. suis	ICE	65905	1166003..1231907	rplL	MOBP1	typeFATA	NA	2	tet(O); erm(B)	37.12
GCA_015908985.1	YP20190405	S. suis	ICE	65905	1896074..1961978	rplL	MOBP1	typeFATA	NA	2	erm(B); tet(O)	37.12
GCA_015908985.1	YP20190405	S. suis	ICE	65905	904396..970300	rplL		typeFATA	NA	2	erm(B); tet(O)	37.12
GCA_016774475.1	ID33329	S. suis	ICE	89979	742170..832148	YlbF/YmcA	MOBV,MOBP1	typeFATA	NA	2	erm(B); tet(O)	38.83
GCA_017309405.1	SC183	S. suis	ICE	103302	998192..1101493	rplL	MOBV,MOBP1	typeFATA	AAGTCTAGTGGGTTATACTTTACATG	6	erm(B); ant(6)-Ia; lsa(E); lnu(B); aph(3')-III; cat	38.54
GCA_017372155.1	1112S	S. suis	ICE	108334	1156167..1264500	LexA	MOBP1,MOBV	typeFATA	NA	3	tet(O); optrA; erm(B)	38.89
GCA_020462325.1	GX69	S. suis	ICE	66083	401004..467086	NA	MOBP1	typeFATA	NA	2	tet(O); erm(B)	39.47
GCA_020462325.1	GX69	S. suis	ICE	112833	722288..835120	rplL	MOBP1	typeFATA	NA	0		38.35
GCA_020462325.1	GX69	S. suis	ICE	58645	1478145..1536789	rplL	MOBP1	typeFATA	NA	0		37.07
GCA_018885285.1	39565	S. suis	ICE	86877	1189364..1276240	YlbF/YmcA	MOBP1,MOBV	typeFATA	NA	2	tet(O); erm(B)	38.77
GCA_019297755.1	ID41570	S. suis	ICE	86877	1144460..1231336	YlbF/YmcA	MOBP1,MOBV	typeFATA	NA	2	tet(O); erm(B)	38.77
GCA_019856275.1	SS389	S. suis	ICE	17527	1521612..1539138	rpmH		typeFA	ACTTAACCCCCCGTATCTAACAGGGGGGTACAAATCGACAGGAAACAGTCAAAAAAACATTAGAAAATCCTTTGGTTACAAGGGATTTACAAAATTTCAGCGTATGTCAAATGGGCTTTAAAAGTTGACATAC	1	tet(M)	39.05
GCA_019856275.1	SS389	S. suis	ICE	26384	411830..438213	YebC/PmpR	MOBP1	typeFATA	NA	0		41.95
GCA_019856275.1	SS389	S. suis	ICE	46447	853606..900052	rpsU	MOBP1	typeFATA	NA	0		41.58
GCA_019856315.1	NJ3	S. suis	ICE	17527	1439765..1457291	rpmH	profile_MOBT	typeFA	ACTTAACCCCCCGTATCTAACAGGGGGGTACAAATCGACAGGAAACAGTCAAAAAAACATTAGAAAATCCTTTGGTTACAAGGGATTTACAAAATTTCAGCGTATGTCAAATGGGCTTTAAAAGTTGACATAC	1	tet(M)	39.07
GCA_019856335.1	FJSM5	S. suis	ICE	60563	1540019..1600581	rplL	MOBP1,MOBV	typeFATA	NA	3	erm(B); tet(O); aph(3')-III	39.43
GCA_019856455.1	AKJ18	S. suis	ICE	86473	1048316..1134788	NA	MOBV,MOBP1	typeFATA	NA	2	tet(O); erm(B)	38.17
GCA_016887735.2	ID32098	S. suis	ICE	86892	1150959..1237850	YlbF/YmcA	MOBP1,MOBV	typeFATA	NA	2	tet(O); erm(B)	38.77
GCA_019967855.1	SZ1908	S. suis	ICE	63954	639721..703674	NA	MOBV,MOBP1	typeFATA	NA	5	aph(3')-III; ant(6)-Ia; erm(B); tet(O); tet(40)	40.43
GCA_021729405.1	LSM157	S. suis	ICE	88673	931663..1020335	rplL	profile_MOBT,MOBP1	typeFA	ACTTAACCCCCCGTATCTAACAGGGGGGTACAAATCGACAGGAAACAGTCAAAAAAACATTAGAAAATCCTTTGGTTACAAGGGATTTACAAAATTTCAGCGTATGTCAAATGGGCTTTAAAAGTTGACATAC	4	erm(B); tet(O); ant(6)-Ia; tet(M)	38.35
GCA_021729405.1	LSM157	S. suis	ICE	90890	929446..1020335	rplL	profile_MOBT,MOBP1	typeFATA	ACTTAACCCCCCGTATCTAACAGGGGGGTACAAATCGACAGGAAACAGTCAAAAAAACATTAGAAAATCCTTTGGTTACAAGGGATTTACAAAATTTCAGCGTATGTCAAATGGGCTTTAAAAGTTGACATAC	0		38.37
GCA_021729385.1	LSM29	S. suis	ICE	89440	578368..667807	tmRNA	MOBV,MOBP1	typeFATA	NA	2	tet(O); erm(B)	38.68
GCA_021729385.1	LSM29	S. suis	ICE	46930	1372362..1419291	rplL	MOBP1,MOBV	typeFATA	NA	2	tet(40); tet(O)	41.13
GCA_025723185.1		S. suis	ICE	81645	769385..851029	NA	MOBV,MOBP1	typeFATA	NA	2	tet(O); erm(B)	38.59
GCA_025723185.1		S. suis	ICE	48351	1097627..1145977	NA		typeFATA	NA	0		38.39
GCA_029203915.2	3112	S. suis	ICE	57136	1116710..1173845	NA		typeFATA	NA	0		35.86
GCA_024206695.1	STC90	S. suis	ICE	105004	1242926..1347929	rplL	MOBP1,MOBV	typeFATA	NA	2	erm(B); tet(O)	39.03
GCA_024206715.1	STC86	S. suis	ICE	105004	1240658..1345661	rplL	MOBP1,MOBV	typeFATA	NA	2	erm(B); tet(O)	39.03
GCA_024206735.1	STC85	S. suis	ICE	105003	1240645..1345647	rplL	MOBP1,MOBV	typeFATA	NA	2	erm(B); tet(O)	39.03
GCA_024206635.1	STC84	S. suis	ICE	105004	1242887..1347890	rplL	MOBP1,MOBV	typeFATA	NA	2	erm(B); tet(O)	39.03
GCA_024206655.1	STC83	S. suis	ICE	105004	1242940..1347943	rplL	MOBP1,MOBV	typeFATA	NA	2	erm(B); tet(O)	39.03
GCA_024206675.1	STC81	S. suis	ICE	105004	1240599..1345602	rplL	MOBP1,MOBV	typeFATA	NA	2	erm(B); tet(O)	39.03
GCA_024206615.1	STC80	S. suis	ICE	105004	1242984..1347987	rplL	MOBP1,MOBV	typeFATA	NA	2	erm(B); tet(O)	39.03
GCA_024206595.1	STC78	S. suis	ICE	105004	1242898..1347901	rplL	MOBP1,MOBV	typeFATA	NA	2	erm(B); tet(O)	39.03
GCA_024206755.1	STC104	S. suis	ICE	105003	1242900..1347902	rplL	MOBP1,MOBV	typeFATA	NA	2	erm(B); tet(O)	39.04
GCA_024220115.1	LSS42	S. suis	ICE	76993	995185..1072177	NA	MOBV,MOBP1	typeFATA	NA	1	tet(O)	40.23
GCA_024220115.1	LSS42	S. suis	ICE	72232	890939..963170	NA	MOBV,MOBP1	typeFATA	NA	1	tet(O)	37.98
GCA_024220075.1	1521251	S. suis	ICE	68436	1860755..1929190	rplL	MOBP1	typeFATA	NA	0		36.89
GCA_024220075.1	1521251	S. suis	ICE	117112	971176..1088287	NA	MOBP1,MOBV	typeFATA	NA	2	erm(B); tet(O)	38.79
GCA_024220135.1	T15	S. suis	ICE	177996	908129..1086124	NA	MOBQ,MOBP1	typeFATA	NA	0		37.34
GCA_024509515.2	DE609B	S. suis	ICE	72707	580076..652782	NA	MOBV,MOBP1	typeFATA	NA	2	tet(O); erm(B)	38.22
GCA_024498155.1	2018WUSS151	S. suis	ICE	86558	1906693..1993250	rplL	MOBV,MOBP1,MOBF	typeFATA	NA	2	tet(O); erm(B)	39.81
GCA_024582935.1	M106471_S40	S. suis	ICE	70068	981325..1051392	rplL	MOBP1,MOBV	typeFATA	NA	1	tet(O)	39.79
GCA_024582955.1	M104300_S20	S. suis	ICE	76589	580088..656676	NA	MOBV,MOBP1	typeFATA	CATGTAAAGTATAACCCACTATACTTTACTTCGTAAAGGTG	2	erm(B); tet(O)	38.53
GCA_024582995.1	M102942_S11	S. suis	ICE	121580	1018886..1140465	rplL	MOBP1,MOBV	typeFATA	NA	2	erm(B); tet(O)	39.26
GCA_024582915.1	DNC49	S. suis	ICE	77704	1003280..1080983	rplL	MOBP1,MOBV	typeFATA	NA	1	tet(O)	40.37
GCA_024583035.1	DNR48	S. suis	ICE	23487	839465..862951	rplL	MOBP1	typeFATA	NA	0		39.82
GCA_024583035.1	DNR48	S. suis	ICE	70519	1019208..1089726	rplL	MOBP1	typeFATA	NA	0		37.21
GCA_024583035.1	DNR48	S. suis	ICE	65429	2047313..2112741	rplL	MOBP1,MOBV	typeFATA	NA	1	tet(O)	39
GCA_024583015.1	DNR43	S. suis	ICE	126493	1046051..1172543	rplL	MOBP1,MOBV	typeFATA	NA	1	tet(O)	38.86
GCA_024583075.1	DNC15	S. suis	ICE	85652	930298..1015949	NA	MOBV,MOBP1	typeFATA	CACGACTTTGCGAAGCAAAGTGTAGTGTGTTATAC	3	tet(O); ant(6)-Ia; erm(B)	38.94
GCA_024583075.1	DNC15	S. suis	ICE	40572	1282644..1323215	rplL	MOBP1	typeFATA	NA	0		41.16
GCA_024583095.1	DNC13	S. suis	ICE	52128	2089473..2141600	rplL	MOBP1	typeFATA	NA	0		37.51
GCA_024583115.1	DNS11	S. suis	ICE	51814	1073037..1124850	rplL		typeFATA	NA	0		38.29
GCA_029542025.1	Transconjugant cAKJ47-2	S. suis	ICE	70208	1827434..1897641	rplL	MOBP1	typeFATA	NA	1	optrA	37.07
GCA_029542025.1	Transconjugant cAKJ47-2	S. suis	ICE	70208	2054132..2124339	rplL	MOBP1	typeFATA	NA	1	optrA	37.07
GCA_025946885.1	TRG6	S. suis	ICE	68386	1853000..1921385	NA	MOBP1	typeFATA	NA	0		36.93
GCA_025946885.1	TRG6	S. suis	ICE	27967	700122..728088	rplL	MOBP1	typeFATA	CTTAGGGGCTTGGGGATATTCCCCAA	1	erm(B)	38.59
GCA_025946885.1	TRG6	S. suis	ICE	135537	959067..1094603	NA	MOBP1,MOBV	typeFATA	NA	2	erm(B); tet(O)	39.14
GCA_025946865.1	ID36054	S. suis	ICE	27967	1329868..1357834	rplL	MOBP1	typeFATA	TTGGGGAATATCCCCAAGCCCCTAAG	1	erm(B)	38.59
GCA_025946865.1	ID36054	S. suis	ICE	68407	192540..260946	NA	MOBP1	typeFATA	NA	0		36.92
GCA_025946865.1	ID36054	S. suis	ICE	69670	1027724..1097393	rplL	MOBV,MOBP1	typeFATA	NA	2	tet(O); erm(B)	40.2
GCA_025946925.1	ID34572	S. suis	ICE	29411	694096..723506	rplL	MOBP1	typeFATA	CTTAGGGGCTTGGGGATATTCCCCAA	1	erm(B)	38.65
GCA_025946925.1	ID34572	S. suis	ICE	134118	954428..1088545	NA	MOBP1,MOBV	typeFATA	NA	2	erm(B); tet(O)	39.14
GCA_025946925.1	ID34572	S. suis	ICE	68402	1848266..1916667	NA	MOBP1	typeFATA	NA	0		36.92
GCA_025946905.1	ID38828	S. suis	ICE	167585	1287114..1454698	tRNA-Ser	MOBP1	typeFATA	NA	2	erm(B); tet(O)	40
GCA_025946945.1	ID35541	S. suis	ICE	111123	834278..945400	rplL	firmi_Viral_Rep_B1,MOBP1,MOBV	typeFATA	NA	3	aph(3')-III; ant(6)-Ia; tet(O)	37.74
GCA_025980045.1	WUSS030	S. suis	ICE	31837	1130999..1162835	rplL		typeFATA	NA	0		39.85
GCA_029542385.1	SS/UPM/MY/F001	S. suis	ICE	336135	99535..435669	tRNA-Asn	MOBP1	typeFATA	NA	0		40.72
GCA_031875405.1		S. suis	ICE	82481	1246611..1329091	NA	MOBV,MOBP1	typeFATA	NA	2	tet(O); erm(B)	39.29
GCA_031767625.1	1522228	S. suis	ICE	67148	488351..555498	rplL	MOBP1	typeFATA	NA	0		36.86
GCA_031767625.1	1522228	S. suis	ICE	145242	1242194..1387435	NA	MOBP1,MOBV	typeFATA	NA	1	tet(O)	38.55
GCA_031875385.1		S. suis	ICE	71330	1157056..1228385	tmRNA	MOBP1	typeFATA	NA	2	tet(W); erm(B)	40.69
GCA_031875385.1		S. suis	ICE	50873	1291506..1342378	rplL	MOBP1	typeFATA	NA	0		38.96
GCA_031875385.1		S. suis	ICE	166673	942001..1108673	NA	MOBP1	typeFATA	NA	0		38.15
GCA_044361715.1	MY1C3_3B	S. suis	ICE	64600	923968..988567	rplL	MOBP1	typeFATA	NA	0		38.59
GCA_044361715.1	MY1C3_3B	S. suis	ICE	80587	1751125..1831711	NA	MOBP1,MOBV	typeFATA	NA	1	tet(O)	38.1
GCA_031767395.1	NLS50	S. suis	ICE	58008	1134343..1192350	rplL	MOBP1	typeFATA	NA	0		38.01
GCA_032230435.1	ID26102	S. suis	ICE	190753	1024391..1215143	rbgA	MOBQ,MOBP1,MOBV	typeFATA	NA	2	erm(B); tet(O)	37.49
GCA_032230435.1	ID26102	S. suis	ICE	27823	1834943..1862765	NA	MOBP1	typeFATA	CACGACTTTGCGGAGCAAAGTGTAGTGTGTTATAC	1	tet(W)	44.45
GCA_032230435.1	ID26102	S. suis	ICE	30525	23392..53916	tRNA-Ala	MOBP1	typeFATA	NA	0		41.46
GCA_032230435.1	ID26102	S. suis	ICE	24842	1297744..1322585	rplL	MOBP1	typeFATA	NA	0		41.19
GCA_032230965.1	ID48908	S. suis	ICE	39424	385170..424593	tRNA-Leu	MOBP1	typeFATA	NA	0		40.28
GCA_032230965.1	ID48908	S. suis	ICE	31644	818699..850342	rplL	MOBP1	typeFATA	NA	0		41.93
GCA_032230965.1	ID48908	S. suis	ICE	169156	1018040..1187195	rbgA	MOBQ,MOBP1,MOBV	typeFATA	NA	2	tet(O); erm(B)	38.63
GCA_032230985.1	1652329	S. suis	ICE	132014	918159..1050172	NA	MOBP1,MOBV	typeFATA	NA	2	erm(B); tet(O)	39.32
GCA_032230985.1	1652329	S. suis	ICE	67207	1765896..1833102	rplL	MOBP1	typeFATA	NA	0		36.86
GCA_032231005.1	1547095	S. suis	ICE	121086	1154347..1275432	NA	MOBV,MOBP1	typeFATA	NA	2	tet(O); erm(B)	39.03
GCA_034423895.1		S. suis	ICE	73830	149124..222953	tRNA-Ser	MOBP1	typeFATA	NA	3	erm(B); ant(6)-Ia; tet(O)	38.66
GCA_034423915.1		S. suis	ICE	65509	1004623..1070131	rplL	MOBP1	typeFATA	NA	0		37.22
GCA_034423915.1		S. suis	ICE	67551	1524894..1592444	NA	MOBP1,MOBV	typeFATA	NA	2	erm(B); tet(O)	39.63
GCA_034423935.1		S. suis	ICE	37572	903954..941525	NA	MOBP1	typeFATA	NA	0		41.19
GCA_034423935.1		S. suis	ICE	83472	1032013..1115484	rplL	MOBP1	typeFATA	CATGTAAAGTATAGCACACTATACTTTATATTCATAAAGTG	5	lnu(B); lsa(E); aph(2'')-Ic; ant(6)-Ia; tet(O)	37.63
GCA_034423955.1		S. suis	ICE	74731	336062..410792	NA	MOBP1,MOBV	typeFATA	NA	2	erm(B); tet(O)	37.97
GCA_034423955.1		S. suis	ICE	41696	553997..595692	rplL	MOBP1	typeFATA	NA	0		39.21
GCA_034423975.1		S. suis	ICE	64846	557783..622628	rplL	MOBP1,MOBV	typeFATA	CACCTTTACGAAGTAAAGTATAGTGGGTTATACTTTACATG	2	erm(B); tet(O)	38.73
GCA_034423995.1		S. suis	ICE	20215	367636..387850	rplL	profile_MOBT	typeFA	GTATGTCAACTTTTAAAGCCCATTTGACATACGCTGAAATTTTGTAAATCCCTTGTAACCAAAGGATTTTCTAATGTTTTTTTGACTGTTTCCTGTCGATTTGTACCCCCCTGTTAGATACGGGGGGTTAAGT	2	tet(M); erm(B)	38.49
GCA_034424015.1		S. suis	ICE	90151	1703544..1793694	rplL	MOBP1,MOBV	typeFATA	NA	3	tet(O); aph(3')-III; ant(6)-Ia	38.9
GCA_034424035.1		S. suis	ICE	155093	46570..201662	rplL	MOBP1,MOBV	typeFATA	NA	4	tet(O); erm(B); ant(6)-Ia; aph(3')-III	38.38
GCA_034440185.1	2022WUSS148	S. suis	ICE	72161	1138901..1211061	rplL	MOBP1	typeFATA	NA	2	tet(O); tet(40)	38.54
GCA_035658235.1		S. suis	ICE	24579	482888..507466	rplL	MOBP1	typeFATA	NA	2	tet(W); erm(B)	43.92
GCA_045689715.1		S. suis	ICE	24579	483843..508421	rplL	MOBP1	typeFATA	NA	2	tet(W); erm(B)	43.92
GCA_038650695.1	Ss2301	S. suis	ICE	66857	591940..658796	NA	MOBV,MOBP1	typeFATA	NA	1	tet(O)	38.55
GCA_046245185.1	KKAHC02	S. suis	ICE	68927	1092404..1161330	rplL	MOBP1	typeFATA	NA	0		38.31
GCA_000026725.1	SC84	S. suis	ICE	121982	834688..956669	rplL	firmi_Viral_Rep_B1,MOBP1,profile_MOBT	typeFA	GTATGTCAACTTTTAAAGCCCATTTGACATACGCTGAAATTTTGTAAATCCCTTGTAACCAAAGGATTTTCTAATGTTTTTTTGACTGTTTCCTGTCGATTTGTACCCCCCTGTTAGATACGGGGGGTTAAGT	0		36.83
GCA_000026725.1	SC84	S. suis	ICE	124199	834688..958886	rplL	firmi_Viral_Rep_B1,MOBP1,profile_MOBT	typeFATA	GTATGTCAACTTTTAAAGCCCATTTGACATACGCTGAAATTTTGTAAATCCCTTGTAACCAAAGGATTTTCTAATGTTTTTTTGACTGTTTCCTGTCGATTTGTACCCCCCTGTTAGATACGGGGGGTTAAGT	2	tet(M); ant(6)-Ia	36.87
GCA_000026745.1	BM407	S. suis	ICE	91437	509341..600777	rplL	profile_MOBT,MOBP1	typeFA	GTATGTCAACTTTTAAAGCCCATTTGACATACGCTGAAATTTTGTAAATCCCTTGTAACCAAAGGATTTTCTAATGTTTTTTTGACTGTTTCCTGTCGATTTGTACCCCCCTGTTAGATACGGGGGGTTAAGT	1	tet(M)	38.26
GCA_000026745.1	BM407	S. suis	ICE	54014	1050334..1104347	NA	profile_MOBT,MOBV,MOBP1	typeFA	ACTTAACCCCCCGTATCTAACAGGGGGGGTACAAATCGACAGGAAACAGTCAAAAAAACATTAGAAAATCCTTTGGTTACAAGGGATTTACAAAATTTCAGCGTATGTCAAATGGGCTTTAAAAGTTGACATAC	2	tet(M); tet(L)	37.95
GCA_000026745.1	BM407	S. suis	ICE	93654	507124..600777	rplL	profile_MOBT,MOBP1	typeFATA	GTATGTCAACTTTTAAAGCCCATTTGACATACGCTGAAATTTTGTAAATCCCTTGTAACCAAAGGATTTTCTAATGTTTTTTTGACTGTTTCCTGTCGATTTGTACCCCCCTGTTAGATACGGGGGGTTAAGT	0		38.29
GCA_000026745.1	BM407	S. suis	ICE	95880	1008468..1104347	NA	profile_MOBT,MOBV,MOBP1	typeFATA	ACTTAACCCCCCGTATCTAACAGGGGGGGTACAAATCGACAGGAAACAGTCAAAAAAACATTAGAAAATCCTTTGGTTACAAGGGATTTACAAAATTTCAGCGTATGTCAAATGGGCTTTAAAAGTTGACATAC	3	erm(B); tet(O); ant(6)-Ia	37.83
GCA_000521325.1		S. thermophilus	ICE	27678	1600528..1628205	rplL	MOBP1	typeFATA	NA	0		35.18
GCA_000572095.1		S. thermophilus	ICE	33135	634418..667552	NA		typeFATA	NA	0		39.29
GCA_001705585.1	KLDS 3.1003	S. thermophilus	ICE	39331	1206988..1246318	rplL	MOBP1	typeFATA	NA	0		38.31
GCA_002443035.1	B59671	S. thermophilus	ICE	46389	1765038..1811426	rplL	MOBP1	typeFATA	NA	0		39.63
GCA_013307265.1	CS9	S. thermophilus	ICE	56453	789167..845619	rplL	MOBP1	typeFATA	NA	0		38.33
GCA_015190465.1	TK-P3A	S. thermophilus	ICE	62564	994336..1056899	rplL	MOBP1	typeFATA	NA	0		38.49
GCA_039782795.1	90728	S. thermophilus	ICE	52500	610756..663255	rplL	MOBP1	typeFATA	NA	0		39.32
GCA_039783105.1	90729	S. thermophilus	ICE	52499	622299..674797	rplL	MOBP1	typeFATA	NA	0		39.29
GCA_039783225.1	CNRZ760	S. thermophilus	ICE	60860	630777..691636	rplL	MOBP1	typeFATA	NA	0		38.19
GCA_039783285.1	MM20	S. thermophilus	ICE	53748	196153..249900	NA	MOBP1	typeFATA	NA	0		36.2
GCA_039783285.1	MM20	S. thermophilus	ICE	30162	1050073..1080234	rplL	MOBP1	typeFATA	NA	0		34.32
GCA_039784895.1	ST55	S. thermophilus	ICE	56453	614109..670561	rplL	MOBP1	typeFATA	NA	0		38.33
GCA_041514255.1	S24736	S. thermophilus	ICE	64272	655185..719456	rplL	MOBP1	typeFATA	NA	0		38.51
GCA_020736685.1		S. thermophilus	ICE	44114	962997..1007110	NA	MOBP1	typeFATA	CTTAGGGGCTTGGGGATATTCCCCAA	0		39.23
GCA_020736685.1		S. thermophilus	ICE	25296	220308..245603	rplL	MOBP1	typeFATA	TTGGGGAATATCCCCAAGCCCCTAAG	0		39.93
GCA_020736685.1		S. thermophilus	ICE	62549	530120..592668	NA	MOBP1	typeFATA	NA	0		38.46
GCA_047947225.1		S. thermophilus	ICE	56928	1819269..1876196	rplL	MOBP1	typeFATA	CTTAGGGGATTGGGGATATTCCCCAA	0		36.7
GCA_047947255.1		S. thermophilus	ICE	46808	614553..661360	rplL	MOBP1	typeFATA	NA	0		37.53
GCA_047947255.1		S. thermophilus	ICE	26794	1659048..1685841	NA	MOBP1	typeFATA	NA	0		34.84
GCA_047947265.1		S. thermophilus	ICE	46807	622620..669426	NA	MOBP1	typeFATA	NA	0		37.53
GCA_047947265.1		S. thermophilus	ICE	26794	1704275..1731068	rplL	MOBP1	typeFATA	NA	0		34.84
GCA_000253395.1	JIM 8232	S. thermophilus	ICE	52487	529517..582003	rplL	MOBP1	typeFATA	NA	0		36.56
GCA_903886595.1		S. thermophilus	ICE	27749	192340..220088	rplL	MOBP1	typeFATA	NA	0		35.23
GCA_903886645.1		S. thermophilus	ICE	26580	1415132..1441711	rplL	MOBP1	typeFATA	TTGGGGAATATCCCCAATCCCCTAAG	0		40.26
GCA_903886645.1		S. thermophilus	ICE	27749	1764722..1792470	NA	MOBP1	typeFATA	NA	0		35.23
GCA_903886745.1		S. thermophilus	ICE	36257	1800958..1837214	NA	MOBP1	typeFATA	NA	1	tet(S)	35.48
GCA_903886745.1		S. thermophilus	ICE	57036	104771..161806	rplL	PHA_IME_A1,MOBP1	typeFATA	CTTAGGGGCTTGGGGATATTCCCCAA	0		37.73
GCA_903886745.1		S. thermophilus	ICE	68628	491583..560210	NA	MOBP1	typeFATA	NA	0		35.58
GCA_903890635.1		S. thermophilus	ICE	68628	1404156..1472783	NA	MOBP1	typeFATA	NA	0		35.58
GCA_903890635.1		S. thermophilus	ICE	32601	1802560..1835160	NA	MOBP1	typeFATA	NA	0		35.74
GCA_903890635.1		S. thermophilus	ICE	25846	494636..520481	rplL	MOBP1	typeFATA	CTTAGGGGCTTGGGGATTTTCCCCAA	0		40.31
GCA_903890905.1		S. thermophilus	ICE	60860	624970..685829	rplL	MOBP1	typeFATA	NA	0		38.19
GCA_903890925.1		S. thermophilus	ICE	60860	624970..685829	rplL	MOBP1	typeFATA	NA	0		38.18
GCA_900474985.1	NCTC12958	S. thermophilus	ICE	62549	150607..213155	NA	MOBP1	typeFATA	NA	0		38.46
GCA_900474985.1	NCTC12958	S. thermophilus	ICE	25296	497672..522967	NA	MOBP1	typeFATA	CTTAGGGGCTTGGGGATATTCCCCAA	0		39.93
GCA_900474985.1	NCTC12958	S. thermophilus	ICE	24550	598132..622681	NA	MOBP1	typeFATA	NA	0		36.2
GCA_900474985.1	NCTC12958	S. thermophilus	ICE	23324	1838436..1861759	rplL	MOBP1	typeFATA	TTGGGGAATATCCCCAAGCCCCTAAG	0		39.08
GCA_024346585.1	TP1632	S. toyakuensis	ICE	23247	1812623..1835869	NA	profile_MOBT	typeFA	AACCCCTCGGTATCTAACAGGGGGGTACAAATCGACAGGAAACAGTCAAAAAAACATTAGAAAATCCTTTGGTTACAAGGGATTTACAAAATTTCAGCGTATGTCAAATGGGCTTTAAAAGTTGACATAC	2	tet(M); erm(B)	38.19
GCA_900475695.1	NCTC4674	S. uberis	ICE	51379	1228318..1279696	tRNA-Val	MOBP1	typeFATA	NA	0		35.85
GCA_900636885.1	NCTC13766	S. urinalis	ICE	59332	1050541..1109872	rplL	MOBP1	typeFATA	NA	0		37.61

## Sheet: Table_S4_IME_information
Assembly accession	Strain name	Species	MGE class	Element size (bp)	Genomic location	Insertion locus	Relaxase family	oriT sequence	Number of ARGs	ARG(s)	GC content(%)
GCA_900187245.1	NCTC11291	S. acidominimus	IME	7027	307226..314252	rpsI	MOBV	ACCTTTACCATGTAAAGGCTAGTGAGTTACACTTTA	0		36.27
GCA_900187245.1	NCTC11291	S. acidominimus	IME	4052	2095135..2099186	deoxyribonuclease	firmi_Rep_2	NA	0		35.74
GCA_900187245.1	NCTC11291	S. acidominimus	IME	2936	2255244..2258179	Uncharacterised protein	MOBV	NA	0		41.38
GCA_000007265.1	2603V/R	S. agalactiae	IME	7014	231795..238808	rpsI	MOBV	GCACATTTACGTAGTAAAGTGTAGTGCGTTACACTTTACATG	0		35.73
GCA_000007265.1	2603V/R	S. agalactiae	IME	22278	1238401..1260678	rpsU	MOBP1	NA	0		36.13
GCA_000007265.1	2603V/R	S. agalactiae	IME	16360	1966824..1983183	guaA	MOBT	NA	0		31.96
GCA_000007265.1	2603V/R	S. agalactiae	IME	2838	2091951..2094788	rpmG	MOBT	NA	0		NA
GCA_003966545.1	HU-GS5823	S. agalactiae	IME	6852	231337..238188	rpsI	MOBV	GCACATTTACGTAGTAAAGTGTAGTGCGTTACACTTTACATG	0		36.49
GCA_021655535.1	GCMC97051	S. agalactiae	IME	5383	97404..102786	tRNA-Tyr	MOBT	NA	0		32.55
GCA_021655535.1	GCMC97051	S. agalactiae	IME	12272	287476..299747	rpsI	MOBV	GCACATTTACGTAGTAAAGTGTAGTGCGTTACACTTTACATG	0		36.55
GCA_021655535.1	GCMC97051	S. agalactiae	IME	8474	1843271..1851744	NA	MOBF	NA	0		36.55
GCA_021655535.1	GCMC97051	S. agalactiae	IME	6309	2186430..2192738	NA	firmi_Viral_Rep_B2	NA	0		33.59
GCA_000012705.1	A909	S. agalactiae	IME	6851	241345..248195	rpsI	MOBV	GCACATTTACGTAGTAAAGTGTAGTGCGTTACACTTTACATG	0		36.48
GCA_000012705.1	A909	S. agalactiae	IME	18388	1292683..1311070	uvrC	firmi_Rep_2	NA	0		35.35
GCA_000012705.1	A909	S. agalactiae	IME	4428	1939017..1943444	tRNA-Lys	MOBT	NA	0		30.98
GCA_000012705.1	A909	S. agalactiae	IME	2203	2049855..2052057	rpmH	firmi_Rep_2	NA	0		35.22
GCA_000299135.1	GD201008-001	S. agalactiae	IME	6851	243872..250722	rpsI	MOBV	GCACATTTACGTAGTAAAGTGTAGTGCGTTACACTTTACATG	0		36.46
GCA_000299135.1	GD201008-001	S. agalactiae	IME	6414	1247097..1253510	NA	firmi_Rep_2	NA	0		30.01
GCA_000299135.1	GD201008-001	S. agalactiae	IME	4428	1886637..1891064	tRNA-Lys	MOBT	NA	0		30.98
GCA_000299135.1	GD201008-001	S. agalactiae	IME	2981	1999599..2002579	cusR	firmi_Viral_Rep_B2	NA	0		35.26
GCA_000782855.1	CNCTC 10/84	S. agalactiae	IME	2676	959635..962310	guaA	MOBT	NA	0		34.94
GCA_000782855.1	CNCTC 10/84	S. agalactiae	IME	2202	1951050..1953251	rpmG	firmi_Rep_2	NA	0		35.24
GCA_000831145.1	GBS1-NY	S. agalactiae	IME	6852	247439..254290	rpsI	MOBV	GCACATTTACGTAGTAAAGTGTAGTGCGTTACACTTTACATG	0		36.49
GCA_000831145.1	GBS1-NY	S. agalactiae	IME	19714	1304261..1323974	NA	firmi_Rep_2	NA	0		NA
GCA_000831145.1	GBS1-NY	S. agalactiae	IME	2838	1954679..1957516	rpmG	MOBT	NA	0		NA
GCA_000831145.1	GBS1-NY	S. agalactiae	IME	17403	2143135..2160537	NA	MOBT,firmi_Rep_2	NA	0		NA
GCA_000831125.1	GBS2-NM	S. agalactiae	IME	6851	245888..252738	rpsI	MOBV	GCACATTTACGTAGTAAAGTGTAGTGCGTTACACTTTACATG	0		36.48
GCA_000831125.1	GBS2-NM	S. agalactiae	IME	19679	1334415..1354093	NA	firmi_Rep_2	NA	0		35.55
GCA_000831125.1	GBS2-NM	S. agalactiae	IME	2838	1926720..1929557	rpmG	MOBT	NA	0		41.01
GCA_000831125.1	GBS2-NM	S. agalactiae	IME	17402	2113731..2131132	NA	MOBT,firmi_Rep_2	NA	0		36.36
GCA_000831105.1	GBS6	S. agalactiae	IME	6852	262338..269189	rpsI	MOBV	GCACATTTACGTAGTAAAGTGTAGTGCGTTACACTTTACATG	0		36.49
GCA_000831105.1	GBS6	S. agalactiae	IME	19714	1330643..1350356	NA	firmi_Rep_2	NA	0		35.52
GCA_000831105.1	GBS6	S. agalactiae	IME	2838	1937578..1940415	rpmG	MOBT	NA	0		40.98
GCA_000831105.1	GBS6	S. agalactiae	IME	17402	2129594..2146995	NA	MOBT,firmi_Rep_2	NA	0		36.35
GCA_000730255.1	NGBS572	S. agalactiae	IME	2838	1984985..1987822	rpmG	MOBT	NA	0		40.98
GCA_000730255.1	NGBS572	S. agalactiae	IME	2203	1998749..2000951	rpmH	firmi_Rep_2	NA	0		35.22
GCA_001026925.1	SS1	S. agalactiae	IME	11384	231214..242597	rpsI	MOBV,PHA_IME_A1	GCACATTTACGTAGTAAAGTGTAGTGCGTTACACTTTACATG	0		33.78
GCA_001026925.1	SS1	S. agalactiae	IME	2249	986122..988370	mcrC	PHA_IME_B	NA	0		33.21
GCA_001026925.1	SS1	S. agalactiae	IME	18253	1267027..1285279	NA	firmi_Rep_2	NA	0		35.3
GCA_001026925.1	SS1	S. agalactiae	IME	2196	2014296..2016491	NA	firmi_Rep_2	NA	0		35.15
GCA_001592385.1	CU_GBS_08	S. agalactiae	IME	6851	249147..255997	rpsI	MOBV	GCACATTTACGTAGTAAAGTGTAGTGCGTTACACTTTACATG	0		36.46
GCA_001592385.1	CU_GBS_08	S. agalactiae	IME	18368	1211982..1230349	NA	firmi_Rep_2	NA	0		35.35
GCA_001592385.1	CU_GBS_08	S. agalactiae	IME	4428	1871127..1875554	tRNA-Lys	MOBT	NA	0		30.98
GCA_001592385.1	CU_GBS_08	S. agalactiae	IME	12083	1981630..1993712	NA	firmi_Viral_Rep_B2,firmi_Rep_2	NA	0		35.05
GCA_001190805.1	HN016	S. agalactiae	IME	6851	244103..250953	rpsI	MOBV	GCACATTTACGTAGTAAAGTGTAGTGCGTTACACTTTACATG	0		36.46
GCA_001190805.1	HN016	S. agalactiae	IME	6558	1248189..1254746	NA	firmi_Rep_2	NA	0		30.22
GCA_001190805.1	HN016	S. agalactiae	IME	4428	1888248..1892675	tRNA-Lys	MOBT	NA	0		30.98
GCA_001190805.1	HN016	S. agalactiae	IME	2981	2001209..2004189	NA	firmi_Viral_Rep_B2	NA	0		35.26
GCA_001190825.1		S. agalactiae	IME	6851	238408..245258	rpsI	MOBV	GCACATTTACGTAGTAAAGTGTAGTGCGTTACACTTTACATG	0		36.46
GCA_001190825.1		S. agalactiae	IME	6558	1242334..1248891	NA	firmi_Rep_2	NA	0		30.22
GCA_001190825.1		S. agalactiae	IME	4428	1871484..1875911	tRNA-Lys	MOBT	NA	0		30.98
GCA_001190825.1		S. agalactiae	IME	2981	1984444..1987424	NA	firmi_Viral_Rep_B2	NA	0		35.26
GCA_001190845.1		S. agalactiae	IME	6851	243869..250719	rpsI	MOBV	GCACATTTACGTAGTAAAGTGTAGTGCGTTACACTTTACATG	0		36.46
GCA_001190845.1		S. agalactiae	IME	6558	1247985..1254542	NA	firmi_Rep_2	NA	0		30.22
GCA_001190845.1		S. agalactiae	IME	4428	1887876..1892303	tRNA-Lys	MOBT	NA	0		NA
GCA_001190845.1		S. agalactiae	IME	2981	2000837..2003817	NA	firmi_Viral_Rep_B2	NA	0		NA
GCA_001190885.1	H002	S. agalactiae	IME	6852	230487..237338	rpsI	MOBV	GCACATTTACGTAGTAAAGTGTAGTGCGTTACACTTTACATG	0		36.5
GCA_001190885.1	H002	S. agalactiae	IME	5383	254801..260183	tRNA-Tyr	MOBT	NA	0		32.57
GCA_001275545.2	SG-M1	S. agalactiae	IME	6851	257990..264840	rpsI	MOBV	GCACATTTACGTAGTAAAGTGTAGTGCGTTACACTTTACATG	0		36.46
GCA_001275545.2	SG-M1	S. agalactiae	IME	4428	1900329..1904756	tRNA-Lys	MOBT	NA	0		30.98
GCA_001275545.2	SG-M1	S. agalactiae	IME	9636	2010828..2020463	NA	firmi_Viral_Rep_B2,firmi_Rep_2	NA	0		34.94
GCA_001552035.1	NGBS128	S. agalactiae	IME	4672	1277901..1282572	NA	PHA_IME_B	NA	0		31.66
GCA_001552035.1	NGBS128	S. agalactiae	IME	2203	2011481..2013683	rpmH	firmi_Rep_2	NA	0		35.22
GCA_001712835.1	NGBS357	S. agalactiae	IME	7127	231325..238451	NA	MOBV	NA	0		NA
GCA_001712835.1	NGBS357	S. agalactiae	IME	2249	1067874..1070122	mcrC	PHA_IME_B	NA	0		NA
GCA_001712835.1	NGBS357	S. agalactiae	IME	18052	1350408..1368459	NA	firmi_Rep_2	NA	0		NA
GCA_001712835.1	NGBS357	S. agalactiae	IME	2838	2081567..2084404	rpmG	MOBT	NA	0		NA
GCA_001712835.1	NGBS357	S. agalactiae	IME	2196	2095210..2097405	NA	firmi_Rep_2	NA	0		NA
GCA_001448985.1	GBS ST-1	S. agalactiae	IME	21089	231626..252714	rpsI	firmi_Viral_Rep_A,MOBV,PHA_IME_A1	GCACATTTACGTAGTAAAGTGTAGTGCGTTACACTTTACATG	0		34.55
GCA_001448985.1	GBS ST-1	S. agalactiae	IME	2249	1009753..1012001	mcrC	PHA_IME_B	NA	0		33.21
GCA_001448985.1	GBS ST-1	S. agalactiae	IME	18051	1292096..1310146	NA	firmi_Rep_2	NA	0		35.27
GCA_001448985.1	GBS ST-1	S. agalactiae	IME	2196	1981052..1983247	NA	firmi_Rep_2	NA	0		35.2
GCA_001448985.1	GBS ST-1	S. agalactiae	IME	2197	2088192..2090388	NA	firmi_Rep_2	NA	0		35.14
GCA_001932715.1	GBS-M002	S. agalactiae	IME	12401	230275..242675	guaA	MOBT	NA	0		37.53
GCA_001932715.1	GBS-M002	S. agalactiae	IME	2959	1807902..1810860	NA	MOBT	NA	0		35.05
GCA_001932715.1	GBS-M002	S. agalactiae	IME	2203	2016005..2018207	NA	firmi_Rep_2	NA	0		35.22
GCA_001683515.1	FWL1402	S. agalactiae	IME	6851	271132..277982	rpsI	MOBV	GCACATTTACGTAGTAAAGTGTAGTGCGTTACACTTTACATG	0		36.46
GCA_001683515.1	FWL1402	S. agalactiae	IME	4428	1893333..1897760	tRNA-Lys	MOBT	NA	0		30.98
GCA_001683515.1	FWL1402	S. agalactiae	IME	9636	2003824..2013459	NA	firmi_Viral_Rep_B2,firmi_Rep_2	NA	0		34.94
GCA_001729925.2	WC1535	S. agalactiae	IME	2004	534142..536145	ftsK	firmi_Rep_2	NA	0		35.23
GCA_001729925.2	WC1535	S. agalactiae	IME	6851	1564209..1571059	rpsI	MOBV	CATGTAAAGTGTAACGCACTACACTTTACTACGTAAATGTGC	0		36.46
GCA_001729925.2	WC1535	S. agalactiae	IME	2981	1889569..1892549	NA	firmi_Viral_Rep_B2	NA	0		35.26
GCA_001729925.2	WC1535	S. agalactiae	IME	5694	2001082..2006775	tRNA-Lys	MOBT	NA	0		32.42
GCA_002025025.1	Sag37	S. agalactiae	IME	6851	241231..248081	rpsI	MOBV	GCACATTTACGTAGTAAAGTGTAGTGCGTTACACTTTACATG	0		36.46
GCA_002025025.1	Sag37	S. agalactiae	IME	14079	265532..279610	tRNA-Trp	firmi_Rep_2	NA	0		31.68
GCA_002025025.1	Sag37	S. agalactiae	IME	4428	2013456..2017883	tRNA-Lys	MOBT	NA	0		30.94
GCA_002025025.1	Sag37	S. agalactiae	IME	2203	2122107..2124309	rpmH	firmi_Rep_2	NA	0		35.22
GCA_002025005.1	Sag158	S. agalactiae	IME	6852	230474..237325	rpsI	MOBV	GCACATTTACGTAGTAAAGTGTAGTGCGTTACACTTTACATG	0		36.5
GCA_002025005.1	Sag158	S. agalactiae	IME	5384	254789..260172	tRNA-Tyr	MOBT	NA	0		32.56
GCA_002073695.2	FDAARGOS_254	S. agalactiae	IME	6852	93862..100713	rpsI	MOBV	CATGTAAAGTGTAACGCACTACACTTTACTACGTAAATGTGC	0		36.47
GCA_002073695.2	FDAARGOS_254	S. agalactiae	IME	17402	441650..459051	NA	firmi_Rep_2,MOBT	NA	0		36.36
GCA_002073695.2	FDAARGOS_254	S. agalactiae	IME	2838	644770..647607	rpmG	MOBT	NA	0		40.94
GCA_002073695.2	FDAARGOS_254	S. agalactiae	IME	19764	1229170..1248933	NA	firmi_Rep_2	NA	0		35.48
GCA_003287995.1	B509	S. agalactiae	IME	6851	235111..241961	rpsI	MOBV	CATGTAAAGTGTAACGCACTACACTTTACTACGTAAATGTGC	0		36.46
GCA_003287995.1	B509	S. agalactiae	IME	4428	665830..670257	tRNA-Lys	MOBT	NA	0		30.98
GCA_003287995.1	B509	S. agalactiae	IME	18438	1298135..1316572	NA	firmi_Rep_2	NA	0		35.33
GCA_003288055.1	B507	S. agalactiae	IME	6851	61227..68077	rpsI	MOBV	GCACATTTACGTAGTAAAGTGTAGTGCGTTACACTTTACATG	0		36.46
GCA_003288055.1	B507	S. agalactiae	IME	4428	1701532..1705959	tRNA-Lys	MOBT	NA	0		30.98
GCA_003288055.1	B507	S. agalactiae	IME	2203	1804650..1806852	rpmH	firmi_Rep_2	NA	0		35.22
GCA_003288055.1	B507	S. agalactiae	IME	8951	1979908..1988858	tRNA-Trp	firmi_Rep_2	NA	0		31.87
GCA_003288055.1	B507	S. agalactiae	IME	8951	2072978..2081928	tRNA-Trp	firmi_Rep_2	NA	0		31.87
GCA_003288075.1	B111	S. agalactiae	IME	2959	1101976..1104934	guaA	MOBT	NA	0		35.01
GCA_003288075.1	B111	S. agalactiae	IME	17006	1190832..1207837	tRNA-Lys	MOBT	NA	0		32.08
GCA_003288075.1	B111	S. agalactiae	IME	6966	1321800..1328765	NA	firmi_Rep_2	NA	0		29.62
GCA_003288075.1	B111	S. agalactiae	IME	20855	1628666..1649520	NA	MOBV,MOBT	GCACATTTACGAAGTAAAGTGTAGTGCGTTACACTTTACATG	0		35.62
GCA_003288035.1	B105	S. agalactiae	IME	2203	2157273..2159475	rpmH	firmi_Rep_2	NA	0		35.27
GCA_002197205.1	CUGBS591	S. agalactiae	IME	6851	222683..229533	rpsI	MOBV	GCACATTTACGTAGTAAAGTGTAGTGCGTTACACTTTACATG	0		36.46
GCA_002197205.1	CUGBS591	S. agalactiae	IME	14079	246984..261062	tRNA-Trp	firmi_Rep_2	NA	0		31.68
GCA_002197205.1	CUGBS591	S. agalactiae	IME	18714	1351393..1370106	NA	firmi_Rep_2	NA	0		35.4
GCA_002197205.1	CUGBS591	S. agalactiae	IME	4428	2022924..2027351	tRNA-Lys	MOBT	NA	0		30.96
GCA_002197205.1	CUGBS591	S. agalactiae	IME	2203	2131573..2133775	rpmH	firmi_Rep_2	NA	0		35.22
GCA_002197425.1	SG-M163	S. agalactiae	IME	6851	257990..264840	rpsI	MOBV	GCACATTTACGTAGTAAAGTGTAGTGCGTTACACTTTACATG	0		36.46
GCA_002197425.1	SG-M163	S. agalactiae	IME	4428	1900328..1904755	tRNA-Lys	MOBT	NA	0		30.98
GCA_002197425.1	SG-M163	S. agalactiae	IME	12083	2010827..2022909	NA	firmi_Viral_Rep_B2,firmi_Rep_2	NA	0		35.04
GCA_002197265.1	SG-M158	S. agalactiae	IME	6851	257990..264840	rpsI	MOBV	GCACATTTACGTAGTAAAGTGTAGTGCGTTACACTTTACATG	0		36.46
GCA_002197265.1	SG-M158	S. agalactiae	IME	4428	1900329..1904756	tRNA-Lys	MOBT	NA	0		30.98
GCA_002197265.1	SG-M158	S. agalactiae	IME	12083	2010828..2022910	NA	firmi_Viral_Rep_B2,firmi_Rep_2	NA	0		35.04
GCA_002197245.1	SG-M50	S. agalactiae	IME	6851	257990..264840	rpsI	MOBV	GCACATTTACGTAGTAAAGTGTAGTGCGTTACACTTTACATG	0		36.46
GCA_002197245.1	SG-M50	S. agalactiae	IME	4428	1900327..1904754	tRNA-Lys	MOBT	NA	0		30.98
GCA_002197245.1	SG-M50	S. agalactiae	IME	12083	2010827..2022909	NA	firmi_Viral_Rep_B2,firmi_Rep_2	NA	0		35.04
GCA_002197285.1	SG-M29	S. agalactiae	IME	6850	257990..264839	rpsI	MOBV	GCACATTTACGTAGTAAAGTGTAGTGCGTTACACTTTACATG	0		36.45
GCA_002197285.1	SG-M29	S. agalactiae	IME	4428	1900290..1904717	tRNA-Lys	MOBT	NA	0		30.98
GCA_002197285.1	SG-M29	S. agalactiae	IME	12083	2010790..2022872	NA	firmi_Viral_Rep_B2,firmi_Rep_2	NA	0		35.04
GCA_002197305.1	SG-M25	S. agalactiae	IME	6567	253511..260077	NA	MOBV	NA	0		35.98
GCA_002197305.1	SG-M25	S. agalactiae	IME	2607	2012293..2014899	guaA	MOBT	ACCCCCCTATTAGAAATAGTGGG	0		33.06
GCA_002197305.1	SG-M25	S. agalactiae	IME	2838	2120587..2123424	rpmG	MOBT	NA	0		40.98
GCA_002197325.1	SG-M8	S. agalactiae	IME	23588	212552..236139	NA	MOBV,MOBT	GCACATTTACGAAGTAAAGTGTAGTGCGTTACACTTTACATG	0		34.87
GCA_002197325.1	SG-M8	S. agalactiae	IME	2959	1850719..1853677	guaA	MOBT	NA	0		35.01
GCA_002197325.1	SG-M8	S. agalactiae	IME	6966	2071212..2078177	NA	firmi_Rep_2	NA	0		29.62
GCA_002197365.1	SG-M6	S. agalactiae	IME	44360	1197084..1241443	NA	PHA_IME_B	NA	0		36.68
GCA_002197365.1	SG-M6	S. agalactiae	IME	7055	2004405..2011459	NA	firmi_Rep_2	NA	0		29.87
GCA_002197385.1	SG-M4	S. agalactiae	IME	6851	212433..219283	rpsI	MOBV	GCACATTTACGTAGTAAAGTGTAGTGCATTACACTTTACATG	0		36.45
GCA_002197385.1	SG-M4	S. agalactiae	IME	2203	1984845..1987047	rpmH	firmi_Rep_2	NA	0		35.22
GCA_002289205.1	874391	S. agalactiae	IME	4654	1300557..1305210	NA	PHA_IME_B	NA	0		31.56
GCA_002289205.1	874391	S. agalactiae	IME	2203	2076604..2078806	rpmH	firmi_Rep_2	NA	0		35.22
GCA_002812505.1	SGEHI2015-113	S. agalactiae	IME	6851	217360..224210	rpsI	MOBV	GCACATTTACGTAGTAAAGTGTAGTGCGTTACACTTTACATG	0		36.46
GCA_002812505.1	SGEHI2015-113	S. agalactiae	IME	4428	1827366..1831793	tRNA-Lys	MOBT	NA	0		30.98
GCA_002812505.1	SGEHI2015-113	S. agalactiae	IME	9636	1937869..1947504	NA	firmi_Viral_Rep_B2,firmi_Rep_2	NA	0		34.94
GCA_002812425.1	SGEHI2015-107	S. agalactiae	IME	6851	217357..224207	rpsI	MOBV	GCACATTTACGTAGTAAAGTGTAGTGCGTTACACTTTACATG	0		36.48
GCA_002812425.1	SGEHI2015-107	S. agalactiae	IME	4428	1809410..1813837	tRNA-Lys	MOBT	NA	0		30.98
GCA_002812425.1	SGEHI2015-107	S. agalactiae	IME	2981	1919910..1922890	NA	firmi_Viral_Rep_B2	NA	0		35.19
GCA_002812445.1	SGEHI2015-95	S. agalactiae	IME	6851	257989..264839	rpsI	MOBV	GCACATTTACGTAGTAAAGTGTAGTGCGTTACACTTTACATG	0		36.46
GCA_002812445.1	SGEHI2015-95	S. agalactiae	IME	4428	1900291..1904718	tRNA-Lys	MOBT	NA	0		30.98
GCA_002812445.1	SGEHI2015-95	S. agalactiae	IME	9635	2010787..2020421	NA	firmi_Viral_Rep_B2,firmi_Rep_2	NA	0		34.95
GCA_002812465.1	SGEHI2015-25	S. agalactiae	IME	6851	255312..262162	rpsI	MOBV	GCACATTTACGTAGTAAAGTGTAGTGCGTTACACTTTACATG	0		36.48
GCA_002812465.1	SGEHI2015-25	S. agalactiae	IME	4428	1847368..1851795	tRNA-Lys	MOBT	NA	0		30.98
GCA_002812465.1	SGEHI2015-25	S. agalactiae	IME	2981	1957818..1960798	NA	firmi_Viral_Rep_B2	NA	0		35.19
GCA_009930895.1	YZ1605	S. agalactiae	IME	11912	242340..254251	guaA	MOBT	NA	0		42.19
GCA_009930895.1	YZ1605	S. agalactiae	IME	4580	2065295..2069874	guaA	MOBT	ACCCCCCTATTAGAAAACGGGGGTT	0		33.21
GCA_009930895.1	YZ1605	S. agalactiae	IME	2207	2207821..2210027	NA	firmi_Rep_2	NA	0		35.52
GCA_009930915.1	NJ1606	S. agalactiae	IME	12030	232124..244153	guaA	MOBT	NA	0		37.03
GCA_006716245.1	32790-3A	S. agalactiae	IME	28472	1286227..1314698	NA	PHA_IME_B	NA	0		36.05
GCA_006716245.1	32790-3A	S. agalactiae	IME	2203	2086043..2088245	rpmH	firmi_Rep_2	NA	0		35.22
GCA_006874565.1	PLGBS13	S. agalactiae	IME	11384	231466..242849	rpsI	MOBV,PHA_IME_A1	GCACATTTACGTAGTAAAGTGTAGTGCGTTACACTTTACATG	0		33.78
GCA_006874565.1	PLGBS13	S. agalactiae	IME	2249	985342..987590	mcrC	PHA_IME_B	NA	0		33.21
GCA_006874565.1	PLGBS13	S. agalactiae	IME	2004	1283628..1285631	ftsK	firmi_Rep_2	NA	0		35.28
GCA_003319215.1	S73	S. agalactiae	IME	6851	255386..262236	rpsI	MOBV	GCACATTTACGTAGTAAAGTGTAGTGCGTTACACTTTACATG	0		36.46
GCA_003319215.1	S73	S. agalactiae	IME	4428	1846541..1850968	tRNA-Lys	MOBT	NA	0		30.98
GCA_003319215.1	S73	S. agalactiae	IME	9636	1956827..1966462	NA	firmi_Viral_Rep_B2,firmi_Rep_2	NA	0		34.94
GCA_003403115.1	Sag27	S. agalactiae	IME	7022	150840..157861	NA	MOBV	CATGTAAAGTATAACACACTATACTTTACTTCGTAAAGGTG	2	cat; tet(L)	33.98
GCA_003403115.1	Sag27	S. agalactiae	IME	12175	1025334..1037508	guaA	MOBT	NA	0		37.56
GCA_003403115.1	Sag27	S. agalactiae	IME	6852	1050479..1057330	rpsI	MOBV	GCACATTTACGTAGTAAAGTGTAGTGCGTTACACTTTACATG	0		36.5
GCA_003403115.1	Sag27	S. agalactiae	IME	5384	1074794..1080177	tRNA-Tyr	MOBT	NA	0		32.56
GCA_003812805.1	FDAARGOS_512	S. agalactiae	IME	2203	1185385..1187587	rpmH	firmi_Rep_2	NA	0		35.27
GCA_003812805.1	FDAARGOS_512	S. agalactiae	IME	18438	1945558..1963995	NA	firmi_Rep_2	NA	0		35.28
GCA_003939065.1	TFJ0901	S. agalactiae	IME	4428	403873..408300	tRNA-Lys	MOBT	NA	0		30.98
GCA_003939065.1	TFJ0901	S. agalactiae	IME	2981	516834..519814	NA	firmi_Viral_Rep_B2	NA	0		35.26
GCA_003939065.1	TFJ0901	S. agalactiae	IME	6851	824375..831225	rpsI	MOBV	GCACATTTACGTAGTAAAGTGTAGTGCGTTACACTTTACATG	0		36.46
GCA_003939065.1	TFJ0901	S. agalactiae	IME	2004	1849341..1851344	ftsK	firmi_Rep_2	NA	0		35.23
GCA_012222485.1	Sag153	S. agalactiae	IME	6851	227618..234468	rpsI	MOBV	GCACATTTACGTAGTAAAGTGTAGTGCGTTACACTTTACATG	0		36.46
GCA_012222485.1	Sag153	S. agalactiae	IME	14079	251920..265998	tRNA-Trp	firmi_Rep_2	NA	0		31.68
GCA_012222485.1	Sag153	S. agalactiae	IME	4428	1989816..1994243	tRNA-Lys	MOBT	NA	0		30.96
GCA_012222485.1	Sag153	S. agalactiae	IME	2203	2097825..2100027	rpmH	firmi_Rep_2	NA	0		35.22
GCA_019552345.1	SS1168	S. agalactiae	IME	11108	231236..242343	rpsI	MOBV,PHA_IME_A1	GCACATTTACGTAGTAAAGTGTAGTGCGTTACACTTTACATG	0		34.02
GCA_019552345.1	SS1168	S. agalactiae	IME	2249	934308..936556	mcrC	PHA_IME_B	NA	0		33.17
GCA_019552345.1	SS1168	S. agalactiae	IME	2004	1232843..1234846	ftsK	firmi_Rep_2	NA	0		35.28
GCA_014218075.1	GBS7	S. agalactiae	IME	11384	231114..242497	rpsI	MOBV,PHA_IME_A1	GCACATTTACGTAGTAAAGTGTAGTGCGTTACACTTTACATG	0		33.79
GCA_014218075.1	GBS7	S. agalactiae	IME	2249	984175..986423	mcrC	PHA_IME_B	NA	0		33.21
GCA_014218075.1	GBS7	S. agalactiae	IME	2004	1281945..1283948	ftsK	firmi_Rep_2	NA	0		35.28
GCA_014218095.1	GBS11	S. agalactiae	IME	11384	274306..285689	rpsI	MOBV,PHA_IME_A1	GCACATTTACGTAGTAAAGTGTAGTGCGTTACACTTTACATG	0		33.78
GCA_014218095.1	GBS11	S. agalactiae	IME	2249	1034576..1036824	mcrC	PHA_IME_B	NA	0		33.17
GCA_014218095.1	GBS11	S. agalactiae	IME	2004	1332585..1334588	ftsK	firmi_Rep_2	NA	0		35.28
GCA_014218115.1	GBS19	S. agalactiae	IME	11384	231114..242497	rpsI	MOBV,PHA_IME_A1	GCACATTTACGTAGTAAAGTGTAGTGCGTTACACTTTACATG	0		33.78
GCA_014218115.1	GBS19	S. agalactiae	IME	2249	993748..995996	mcrC	PHA_IME_B	NA	0		33.21
GCA_014218115.1	GBS19	S. agalactiae	IME	2004	1291229..1293232	ftsK	firmi_Rep_2	NA	0		35.28
GCA_014218135.1	GBS28	S. agalactiae	IME	6851	231113..237963	rpsI	MOBV	GCACATTTACGTAGTAAAGTGTAGTGCGTTACACTTTACATG	0		36.48
GCA_014218135.1	GBS28	S. agalactiae	IME	2249	1031723..1033971	mcrC	PHA_IME_B	NA	0		33.21
GCA_014218135.1	GBS28	S. agalactiae	IME	2004	1329681..1331684	ftsK	firmi_Rep_2	NA	0		35.28
GCA_014218155.1	GBS30	S. agalactiae	IME	11384	231115..242498	rpsI	MOBV,PHA_IME_A1	GCACATTTACGTAGTAAAGTGTAATGCGTTACACTTTACATG	0		33.78
GCA_014218155.1	GBS30	S. agalactiae	IME	2249	969024..971272	mcrC	PHA_IME_B	NA	0		33.21
GCA_014218155.1	GBS30	S. agalactiae	IME	2004	1266600..1268603	ftsK	firmi_Rep_2	NA	0		35.28
GCA_008693585.1	FDAARGOS_670	S. agalactiae	IME	13039	1539622..1552660	rpsI	MOBV	CATGTAAAGTGTAACGCACTACACTTTACTACGTAAATGTGC	0		34.73
GCA_008693585.1	FDAARGOS_670	S. agalactiae	IME	2838	1851292..1854129	rpmG	MOBT	NA	0		41.01
GCA_008693585.1	FDAARGOS_670	S. agalactiae	IME	16360	1962897..1979256	guaA	MOBT	NA	0		31.96
GCA_008693505.1	FDAARGOS_669	S. agalactiae	IME	2203	808225..810427	rpmH	firmi_Rep_2	NA	0		35.27
GCA_008693505.1	FDAARGOS_669	S. agalactiae	IME	2838	821354..824191	rpmG	MOBT	NA	0		41.01
GCA_008693505.1	FDAARGOS_669	S. agalactiae	IME	18438	1575586..1594023	NA	firmi_Rep_2	NA	0		35.28
GCA_011383065.1	ZQ0910	S. agalactiae	IME	6851	244003..250853	rpsI	MOBV	GCACATTTACGTAGTAAAGTGTAGTGCGTTACACTTTACATG	0		36.46
GCA_011383065.1	ZQ0910	S. agalactiae	IME	2004	1252864..1254867	ftsK	firmi_Rep_2	NA	0		35.23
GCA_011383065.1	ZQ0910	S. agalactiae	IME	4428	1888369..1892796	tRNA-Lys	MOBT	NA	0		30.98
GCA_011383065.1	ZQ0910	S. agalactiae	IME	2981	2001330..2004310	NA	firmi_Viral_Rep_B2	NA	0		35.26
GCA_012593885.1	515	S. agalactiae	IME	2203	1969865..1972067	rpmH	firmi_Rep_2	NA	0		35.22
GCA_013000945.1	01173	S. agalactiae	IME	6851	243100..249950	rpsI	MOBV	GCACATTTACGTAGTAAAGTGTAGTGCGTTACACTTTACATG	0		36.46
GCA_013000945.1	01173	S. agalactiae	IME	18714	1262707..1281420	NA	firmi_Rep_2	NA	0		35.4
GCA_013000945.1	01173	S. agalactiae	IME	4428	1914867..1919294	tRNA-Lys	MOBT	NA	0		30.98
GCA_013000945.1	01173	S. agalactiae	IME	2981	2027811..2030791	NA	firmi_Viral_Rep_B2	NA	0		35.26
GCA_021496805.1	SS114	S. agalactiae	IME	7150	231113..238262	rpsI	MOBV	GCACATTTACGTAGTAAAGTGTAGTGCGTTACACTTTACATG	0		35.97
GCA_021496805.1	SS114	S. agalactiae	IME	2249	1032448..1034696	mcrC	PHA_IME_B	NA	0		33.21
GCA_021496805.1	SS114	S. agalactiae	IME	2004	1330120..1332123	ftsK	firmi_Rep_2	NA	0		35.28
GCA_021496825.1	SS102	S. agalactiae	IME	11384	231103..242486	rpsI	MOBV,PHA_IME_A1	GCACATTTACGTAGTAAAGTGTAGTGCGTTACACTTTACATG	0		33.78
GCA_021496825.1	SS102	S. agalactiae	IME	2249	993069..995317	mcrC	PHA_IME_B	NA	0		33.21
GCA_021496825.1	SS102	S. agalactiae	IME	2004	1290549..1292552	ftsK	firmi_Rep_2	NA	0		35.28
GCA_021496845.1	SS44	S. agalactiae	IME	11395	242221..253615	rpsI	MOBV,PHA_IME_A1	GCACATTTACGTAGTAAAGTGTAGTGCGTTACACTTTACATG	0		33.81
GCA_021496845.1	SS44	S. agalactiae	IME	2249	1011951..1014199	mcrC	PHA_IME_B	NA	0		33.21
GCA_021496845.1	SS44	S. agalactiae	IME	2004	1309285..1311288	ftsK	firmi_Rep_2	NA	0		35.28
GCA_021496865.1	SS43	S. agalactiae	IME	11384	231114..242497	rpsI	MOBV,PHA_IME_A1	GCACATTTACGTAGTAAAGTGTAGTGCGTTACACTTTACATG	0		33.78
GCA_021496865.1	SS43	S. agalactiae	IME	2249	994302..996550	mcrC	PHA_IME_B	NA	0		33.21
GCA_021496865.1	SS43	S. agalactiae	IME	2004	1292166..1294169	ftsK	firmi_Rep_2	NA	0		35.28
GCA_021496885.1	GBS68	S. agalactiae	IME	11108	231132..242239	rpsI	MOBV,PHA_IME_A1	GCACATTTACGTAGTAAAGTGTAGTGCGTTACACTTTACATG	0		34.02
GCA_021496885.1	GBS68	S. agalactiae	IME	2249	935056..937304	mcrC	PHA_IME_B	NA	0		33.21
GCA_021496905.1	GBS20	S. agalactiae	IME	11384	231114..242497	rpsI	MOBV,PHA_IME_A1	GCACATTTACGTAGTAAAGTGTAGTGCGTTACACTTTACATG	0		33.78
GCA_021496905.1	GBS20	S. agalactiae	IME	2249	989224..991472	mcrC	PHA_IME_B	NA	0		33.21
GCA_021496905.1	GBS20	S. agalactiae	IME	2004	1288669..1290672	ftsK	firmi_Rep_2	NA	0		35.28
GCA_021496945.1	SS111	S. agalactiae	IME	7150	231113..238262	rpsI	MOBV	GCACATTTACGTAGTAAAGTGTAGTGCGTTACACTTTACATG	0		35.97
GCA_021496945.1	SS111	S. agalactiae	IME	2249	1032448..1034696	mcrC	PHA_IME_B	NA	0		33.21
GCA_021496945.1	SS111	S. agalactiae	IME	2004	1330120..1332123	ftsK	firmi_Rep_2	NA	0		35.28
GCA_021496965.1	GBS47	S. agalactiae	IME	11108	231135..242242	rpsI	MOBV,PHA_IME_A1	GCACATTTACGTAGTAAAGTGTAGTGCGTTACACTTTACATG	0		34.02
GCA_021496965.1	GBS47	S. agalactiae	IME	2249	931808..934056	mcrC	PHA_IME_B	NA	0		33.21
GCA_021496965.1	GBS47	S. agalactiae	IME	2004	1230170..1232173	ftsK	firmi_Rep_2	NA	0		35.28
GCA_013414325.1	S9968	S. agalactiae	IME	10531	323564..334094	tRNA-Leu	MOBT	NA	0		32.08
GCA_013414325.1	S9968	S. agalactiae	IME	6852	351556..358407	rpsI	MOBV	CATGTAAAGTGTAACGCACTACACTTTACTACGTAAATGTGC	0		36.5
GCA_013786965.1	BJ01	S. agalactiae	IME	6852	230414..237265	rpsI	MOBV	GCACATTTACGTAGTAAAGTGTAGTGCGTTACACTTTACATG	0		36.5
GCA_013786965.1	BJ01	S. agalactiae	IME	5383	254729..260111	tRNA-Tyr	MOBT	NA	0		32.57
GCA_015221735.2	CJB111	S. agalactiae	IME	11384	231105..242488	rpsI	MOBV,PHA_IME_A1	GCACATTTACGTAGTAAAGTGTAGTGCGTTACACTTTACATG	0		33.78
GCA_015221735.2	CJB111	S. agalactiae	IME	2249	988288..990536	mcrC	PHA_IME_B	NA	0		33.21
GCA_015221735.2	CJB111	S. agalactiae	IME	2004	1285865..1287868	ftsK	firmi_Rep_2	NA	0		35.28
GCA_023921925.1		S. agalactiae	IME	2004	121454..123457	ftsK	firmi_Rep_2	NA	0		35.23
GCA_023921925.1		S. agalactiae	IME	2981	868551..871531	NA	firmi_Viral_Rep_B2	NA	0		35.26
GCA_023921925.1		S. agalactiae	IME	6851	1188844..1195694	rpsI	MOBV	GCACATTTACGTAGTAAAGTGTAGTGCGTTACACTTTACATG	0		36.46
GCA_021460175.1	MIN-181	S. agalactiae	IME	6851	241162..248012	rpsI	MOBV	GCACATTTACGTAGTAAAGTGTAGTGCGTTACACTTTACATG	0		36.48
GCA_021460175.1	MIN-181	S. agalactiae	IME	2966	965914..968879	NA	firmi_Viral_Rep_B1	NA	0		33.07
GCA_021460175.1	MIN-181	S. agalactiae	IME	18714	1229933..1248646	NA	firmi_Rep_2	NA	0		35.39
GCA_021460175.1	MIN-181	S. agalactiae	IME	4428	1876165..1880592	tRNA-Lys	MOBT	NA	0		30.98
GCA_021460175.1	MIN-181	S. agalactiae	IME	2838	1980508..1983345	rpmG	MOBT	NA	0		40.94
GCA_021460175.1	MIN-181	S. agalactiae	IME	2203	1994274..1996476	rpmH	firmi_Rep_2	NA	0		35.22
GCA_021165795.1		S. agalactiae	IME	5514	273220..278733	NA	MOBV,PHA_IME_A1	NA	0		30.9
GCA_021165795.1		S. agalactiae	IME	2249	1028683..1030931	mcrC	PHA_IME_B	NA	0		33.21
GCA_031202875.1	BCJB4361	S. agalactiae	IME	2838	2113423..2116260	rpmG	MOBT	NA	0		40.98
GCA_031202875.1	BCJB4361	S. agalactiae	IME	2203	2127187..2129389	rpmH	firmi_Rep_2	NA	0		35.22
GCA_031202895.1	BCJB3586	S. agalactiae	IME	7143	231142..238284	rpsI	MOBV	GCACATTTACGTAGTAAAGTGTAGTGCGTTACACTTTACATG	0		36.15
GCA_031202895.1	BCJB3586	S. agalactiae	IME	15117	2018242..2033358	tRNA-Lys	MOBT	NA	0		31.45
GCA_031203395.1	BCJB3344	S. agalactiae	IME	7143	231142..238284	rpsI	MOBV	GCACATTTACGTAGTAAAGTGTAGTGCGTTACACTTTACATG	0		36.13
GCA_031203395.1	BCJB3344	S. agalactiae	IME	15116	2019404..2034519	tRNA-Lys	MOBT	NA	0		31.46
GCA_031203445.1	BCJB3343	S. agalactiae	IME	2838	1982951..1985788	rpmG	MOBT	NA	0		40.98
GCA_031203445.1	BCJB3343	S. agalactiae	IME	2203	1996715..1998917	rpmH	firmi_Rep_2	NA	0		35.22
GCA_031203465.1	BCJB2983	S. agalactiae	IME	2838	1982571..1985408	rpmG	MOBT	NA	0		40.98
GCA_031203465.1	BCJB2983	S. agalactiae	IME	2203	1996335..1998537	rpmH	firmi_Rep_2	NA	0		35.22
GCA_031203715.1	BCJB1835	S. agalactiae	IME	7143	231142..238284	rpsI	MOBV	GCACATTTACGTAGTAAAGTGTAGTGCGTTACACTTTACATG	0		36.15
GCA_031203715.1	BCJB1835	S. agalactiae	IME	15117	2021796..2036912	tRNA-Lys	MOBT	NA	0		31.45
GCA_025402735.1	TAH 10/84	S. agalactiae	IME	2676	959584..962259	guaA	MOBT	NA	0		34.94
GCA_025402735.1	TAH 10/84	S. agalactiae	IME	2202	1951000..1953201	rpmG	firmi_Rep_2	NA	0		35.24
GCA_025402755.1	TAH 10/84 dUdp	S. agalactiae	IME	2676	959561..962236	guaA	MOBT	NA	0		34.94
GCA_025402755.1	TAH 10/84 dUdp	S. agalactiae	IME	2202	1950848..1953049	rpmG	firmi_Rep_2	NA	0		35.24
GCA_025402775.1	TAH 10/84 dMrvR	S. agalactiae	IME	2676	959595..962270	guaA	MOBT	NA	0		34.94
GCA_025402775.1	TAH 10/84 dMrvR	S. agalactiae	IME	2202	1950933..1953134	rpmG	firmi_Rep_2	NA	0		35.24
GCA_025808195.1	SA5087	S. agalactiae	IME	6852	230363..237214	rpsI	MOBV	GCACATTTACGTAGTAAAGTGTAGTGCGTTACACTTTACATG	0		36.49
GCA_025808195.1	SA5087	S. agalactiae	IME	18944	2098609..2117552	tRNA-Lys	MOBT	NA	0		32.35
GCA_030078235.1	CNCTC 10/84 dCas9	S. agalactiae	IME	2676	959203..961878	guaA	MOBT	NA	0		34.94
GCA_030078235.1	CNCTC 10/84 dCas9	S. agalactiae	IME	2202	1950619..1952820	rpmG	firmi_Rep_2	NA	0		35.24
GCA_030078255.1	A909 sCas9	S. agalactiae	IME	6851	241345..248195	rpsI	MOBV	GCACATTTACGTAGTAAAGTGTAGTGCGTTACACTTTACATG	0		36.48
GCA_030078255.1	A909 sCas9	S. agalactiae	IME	18714	1292358..1311071	NA	firmi_Rep_2	NA	0		35.4
GCA_030078255.1	A909 sCas9	S. agalactiae	IME	4428	1939014..1943441	tRNA-Lys	MOBT	NA	0		30.98
GCA_030078255.1	A909 sCas9	S. agalactiae	IME	2203	2048513..2050715	rpmH	firmi_Rep_2	NA	0		35.22
GCA_030078275.1	A909 sCas9revertant	S. agalactiae	IME	6851	241345..248195	rpsI	MOBV	GCACATTTACGTAGTAAAGTGTAGTGCGTTACACTTTACATG	0		36.48
GCA_030078275.1	A909 sCas9revertant	S. agalactiae	IME	18714	1292358..1311071	NA	firmi_Rep_2	NA	0		35.4
GCA_030078275.1	A909 sCas9revertant	S. agalactiae	IME	4428	1939015..1943442	tRNA-Lys	MOBT	NA	0		30.98
GCA_030078275.1	A909 sCas9revertant	S. agalactiae	IME	2203	2048514..2050716	rpmH	firmi_Rep_2	NA	0		35.22
GCA_030078295.1	CNCTC 10/84 sCas9	S. agalactiae	IME	2676	959629..962304	guaA	MOBT	NA	0		34.94
GCA_030078295.1	CNCTC 10/84 sCas9	S. agalactiae	IME	2202	1951045..1953246	rpmG	firmi_Rep_2	NA	0		35.24
GCA_030078315.1	CNCTC 10/84 sCas9revertant	S. agalactiae	IME	2676	959633..962308	guaA	MOBT	NA	0		34.94
GCA_030078315.1	CNCTC 10/84 sCas9revertant	S. agalactiae	IME	2202	1951049..1953250	rpmG	firmi_Rep_2	NA	0		35.24
GCA_030078335.1	A909 dCas9	S. agalactiae	IME	6851	241345..248195	rpsI	MOBV	GCACATTTACGTAGTAAAGTGTAGTGCGTTACACTTTACATG	0		36.48
GCA_030078335.1	A909 dCas9	S. agalactiae	IME	18714	1255012..1273725	NA	firmi_Rep_2	NA	0		35.4
GCA_030078335.1	A909 dCas9	S. agalactiae	IME	4428	1901672..1906099	tRNA-Lys	MOBT	NA	0		30.98
GCA_030078335.1	A909 dCas9	S. agalactiae	IME	2203	2011171..2013373	rpmH	firmi_Rep_2	NA	0		35.22
GCA_030078355.1	CNCTC 10/84 Cas9 AEKOrevertant	S. agalactiae	IME	2676	959617..962292	guaA	MOBT	NA	0		34.94
GCA_030078355.1	CNCTC 10/84 Cas9 AEKOrevertant	S. agalactiae	IME	2202	1951033..1953234	rpmG	firmi_Rep_2	NA	0		35.24
GCA_030078375.1	CNCTC 10/84 Cas9 AEKO	S. agalactiae	IME	2676	955498..958173	guaA	MOBT	NA	0		34.94
GCA_030078375.1	CNCTC 10/84 Cas9 AEKO	S. agalactiae	IME	2202	1946914..1949115	rpmG	firmi_Rep_2	NA	0		35.24
GCA_030078395.1	A909 Cas9 AEKOrevertant	S. agalactiae	IME	6851	241345..248195	rpsI	MOBV	GCACATTTACGTAGTAAAGTGTAGTGCGTTACACTTTACATG	0		36.48
GCA_030078395.1	A909 Cas9 AEKOrevertant	S. agalactiae	IME	18714	1292358..1311071	NA	firmi_Rep_2	NA	0		35.4
GCA_030078395.1	A909 Cas9 AEKOrevertant	S. agalactiae	IME	4428	1939018..1943445	tRNA-Lys	MOBT	NA	0		30.98
GCA_030078395.1	A909 Cas9 AEKOrevertant	S. agalactiae	IME	2203	2048517..2050719	rpmH	firmi_Rep_2	NA	0		35.22
GCA_030078415.1	A909 Cas9 AEKO	S. agalactiae	IME	6851	241345..248195	rpsI	MOBV	GCACATTTACGTAGTAAAGTGTAGTGCGTTACACTTTACATG	0		36.48
GCA_030078415.1	A909 Cas9 AEKO	S. agalactiae	IME	18714	1288251..1306964	NA	firmi_Rep_2	NA	0		35.4
GCA_030078415.1	A909 Cas9 AEKO	S. agalactiae	IME	4428	1934911..1939338	tRNA-Lys	MOBT	NA	0		30.98
GCA_030078415.1	A909 Cas9 AEKO	S. agalactiae	IME	2203	2044410..2046612	rpmH	firmi_Rep_2	NA	0		35.22
GCA_029011195.1	VSI63	S. agalactiae	IME	12175	231092..243266	guaA	MOBT	NA	0		37.56
GCA_029011195.1	VSI63	S. agalactiae	IME	2838	2020870..2023707	rpmG	MOBT	NA	0		40.94
GCA_029011635.1	VSI15	S. agalactiae	IME	6851	241934..248784	rpsI	MOBV	GCACATTTACGTAGTAAAGTGTAGTGCGTTACACTTTACATG	0		36.45
GCA_029011635.1	VSI15	S. agalactiae	IME	14079	266235..280313	tRNA-Trp	firmi_Rep_2	NA	0		31.68
GCA_029011635.1	VSI15	S. agalactiae	IME	18714	1342265..1360978	NA	firmi_Rep_2	NA	0		35.4
GCA_029011635.1	VSI15	S. agalactiae	IME	4428	2016237..2020664	tRNA-Lys	MOBT	NA	0		30.96
GCA_029011635.1	VSI15	S. agalactiae	IME	2203	2124884..2127086	rpmH	firmi_Rep_2	NA	0		35.22
GCA_029011675.1	VSI14	S. agalactiae	IME	6851	241934..248784	rpsI	MOBV	GCACATTTACGTAGTAAAGTGTAGTGCGTTACACTTTACATG	0		36.45
GCA_029011675.1	VSI14	S. agalactiae	IME	14079	266235..280313	tRNA-Trp	firmi_Rep_2	NA	0		31.68
GCA_029011675.1	VSI14	S. agalactiae	IME	18714	1342265..1360978	NA	firmi_Rep_2	NA	0		35.4
GCA_029011675.1	VSI14	S. agalactiae	IME	4428	2016236..2020663	tRNA-Lys	MOBT	NA	0		30.96
GCA_029011675.1	VSI14	S. agalactiae	IME	2203	2124885..2127087	rpmH	firmi_Rep_2	NA	0		35.22
GCA_029278525.1	Guangzhou-SAG092	S. agalactiae	IME	9883	230257..240139	NA	MOBF	NA	0		34.86
GCA_029278525.1	Guangzhou-SAG092	S. agalactiae	IME	2838	2181557..2184394	rpmG	MOBT	NA	0		40.94
GCA_029537275.1	Guangzhou-SAG036	S. agalactiae	IME	2203	2143595..2145797	rpmH	firmi_Rep_2	NA	0		35.22
GCA_030323365.1	GBSIR0001	S. agalactiae	IME	2838	2059660..2062497	rpmG	MOBT	NA	0		40.98
GCA_030323365.1	GBSIR0001	S. agalactiae	IME	2203	2073424..2075626	rpmH	firmi_Rep_2	NA	0		35.22
GCA_029917085.1	CS2108	S. agalactiae	IME	6860	242187..249046	rpsI	MOBV	GCACATTTACGTAGTAAAGTGTAGTGCGTTACACTTTACATG	0		36.44
GCA_029917085.1	CS2108	S. agalactiae	IME	4524	1275330..1279853	NA	firmi_Rep_2	NA	0		33.36
GCA_029917085.1	CS2108	S. agalactiae	IME	4428	1998237..2002664	tRNA-Lys	MOBT	NA	0		30.98
GCA_029917085.1	CS2108	S. agalactiae	IME	2981	2112463..2115443	NA	firmi_Viral_Rep_B2	NA	0		35.26
GCA_049803895.1	AR977	S. agalactiae	IME	7066	908974..916039	rpsI	MOBV	CATGTAAAGTGTAACGCACTACACTTTACTACGTAAATGTGC	0		36.07
GCA_049803895.1	AR977	S. agalactiae	IME	2203	1206909..1209111	rpmH	firmi_Rep_2	NA	0		35.27
GCA_049803895.1	AR977	S. agalactiae	IME	19298	1938542..1957839	NA	firmi_Rep_2	NA	0		35.46
GCA_030908345.1	18/19-02	S. agalactiae	IME	6849	271804..278652	rpsI	MOBV	GCACATTTACGTAGTAAAGTGTAGTGCGTTACACTTTACATG	0		36.44
GCA_030908345.1	18/19-02	S. agalactiae	IME	4428	1920366..1924793	tRNA-Lys	MOBT	NA	0		30.98
GCA_030908345.1	18/19-02	S. agalactiae	IME	9636	2030698..2040333	NA	firmi_Viral_Rep_B2,firmi_Rep_2	NA	0		34.93
GCA_046529655.1	MA07	S. agalactiae	IME	2838	1718845..1721682	rpmG	MOBT	NA	0		40.98
GCA_046529655.1	MA07	S. agalactiae	IME	2203	1732609..1734811	rpmH	firmi_Rep_2	NA	0		35.22
GCA_046529645.1	HU05/19	S. agalactiae	IME	12175	187920..200094	guaA	MOBT	NA	0		37.56
GCA_046529665.1	HU13/21	S. agalactiae	IME	2838	431271..434108	rpmG	MOBT	NA	0		41.01
GCA_046529665.1	HU13/21	S. agalactiae	IME	31603	523374..554976	guaA	MOBT	CATGTAAAGTATAACACACTAGAC	5	tet(S); lsa(E); ant(6)-Ia; erm(B); cat	31.3
GCA_046529675.1	HU32/21	S. agalactiae	IME	5747	1816715..1822461	guaA	MOBT	NA	0		30.78
GCA_046529675.1	HU32/21	S. agalactiae	IME	2838	1911717..1914554	rpmG	MOBT	NA	0		40.98
GCA_046529685.1	HU36/21	S. agalactiae	IME	2838	487028..489865	rpmG	MOBT	NA	0		40.98
GCA_046529705.1	MA15	S. agalactiae	IME	6849	139486..146334	rpsI	MOBV	GCACATTTACGTAGTAAAGTGTAGTGCGTTACACTTTACATG	0		36.57
GCA_033798805.1	R31-snf2-MTast1	S. agalactiae	IME	4428	1721839..1726266	tRNA-Lys	MOBT	NA	0		30.89
GCA_033798825.1	R92-rpsI	S. agalactiae	IME	2838	1383062..1385899	rpmG	MOBT	NA	0		40.98
GCA_033798845.1	R31-snf2-MTase2	S. agalactiae	IME	4428	2000537..2004964	tRNA-Lys	MOBT	NA	0		30.96
GCA_033798845.1	R31-snf2-MTase2	S. agalactiae	IME	2203	2128540..2130742	rpmH	firmi_Rep_2	NA	0		35.22
GCA_033798865.1	SagR92	S. agalactiae	IME	2838	773801..776638	rpmG	MOBT	NA	0		40.94
GCA_033798865.1	SagR92	S. agalactiae	IME	7127	1072360..1079486	rpsI	MOBV	GCACATTTACGTAGTAAAGTGTAGTGCGTTACACTTTACATG	0		35.92
GCA_033798865.1	SagR92	S. agalactiae	IME	5383	1096950..1102332	tRNA-Tyr	MOBT	NA	0		32.57
GCA_033798885.1	SagR31	S. agalactiae	IME	4428	1900079..1904506	tRNA-Lys	MOBT	NA	0		30.96
GCA_033798885.1	SagR31	S. agalactiae	IME	2203	2028082..2030284	rpmH	firmi_Rep_2	NA	0		35.22
GCA_033798905.1	SagR40	S. agalactiae	IME	6851	219159..226009	rpsI	MOBV	CATGTAAAGTGTAATGCACTACACTTTACTACGTAAATGTGC	0		36.46
GCA_033798905.1	SagR40	S. agalactiae	IME	2203	542424..544626	rpmH	firmi_Rep_2	NA	0		35.27
GCA_033798905.1	SagR40	S. agalactiae	IME	4428	648792..653219	tRNA-Lys	MOBT	NA	0		30.96
GCA_033798905.1	SagR40	S. agalactiae	IME	18438	1299511..1317948	NA	firmi_Rep_2	NA	0		35.32
GCA_033798905.1	SagR40	S. agalactiae	IME	16337	1620324..1636660	NA	firmi_Viral_Rep_B1	NA	0		33.89
GCA_033798925.1	R31-snf2	S. agalactiae	IME	4428	1950319..1954746	tRNA-Lys	MOBT	NA	0		30.96
GCA_033798925.1	R31-snf2	S. agalactiae	IME	2203	2078322..2080524	rpmH	firmi_Rep_2	NA	0		35.22
GCA_034329605.1	SagR40_TC	S. agalactiae	IME	16333	75658..91990	NA	firmi_Viral_Rep_B1	NA	0		33.8
GCA_034329605.1	SagR40_TC	S. agalactiae	IME	2203	1217626..1219828	rpmH	firmi_Rep_2	NA	0		35.22
GCA_034329605.1	SagR40_TC	S. agalactiae	IME	6850	1536113..1542962	NA	MOBV	GCACATTTACGTAGTAAAGTGTAGTGCATTACACTTTACATG	0		36.45
GCA_050916465.1	SA001	S. agalactiae	IME	7128	92378..99505	rpsI	MOBV	GCACATTTACGTAGTAAAGTGTAGTGCGTTACACTTTACATG	0		36
GCA_050916535.1	NN168	S. agalactiae	IME	7128	396519..403646	rpsI	MOBV	GCACATTTACGTAGTAAAGTGTAGTGCGTTACACTTTACATG	0		36
GCA_050916545.1	NN105	S. agalactiae	IME	11172	492936..504107	guaA	MOBT	NA	0		42.52
GCA_050916555.1	NN067	S. agalactiae	IME	7128	2002008..2009135	rpsI	MOBV	GCACATTTACGTAGTAAAGTGTAGTGCGTTACACTTTACATG	0		36
GCA_050916565.1	GZ289	S. agalactiae	IME	7128	299759..306886	rpsI	MOBV	GCACATTTACGTAGTAAAGTGTAGTGCGTTACACTTTACATG	0		36
GCA_037217205.1	XM_1	S. agalactiae	IME	28472	1109178..1137649	NA	PHA_IME_B	NA	0		36.05
GCA_037217205.1	XM_1	S. agalactiae	IME	2203	1908782..1910984	rpmH	firmi_Rep_2	NA	0		35.22
GCA_037240675.1	SagR40_TC_rplL	S. agalactiae	IME	16335	27226..43560	NA	firmi_Viral_Rep_B1	NA	0		33.81
GCA_037240675.1	SagR40_TC_rplL	S. agalactiae	IME	6850	776060..782909	NA	MOBV	CATGTAAAGTGTAATGCACTACACTTTACTACGTAAATGTGC	0		36.42
GCA_037240675.1	SagR40_TC_rplL	S. agalactiae	IME	2203	1099217..1101419	rpmH	firmi_Rep_2	NA	0		35.27
GCA_037240675.1	SagR40_TC_rplL	S. agalactiae	IME	4428	1205566..1209993	tRNA-Lys	MOBT	NA	0		30.92
GCA_037240675.1	SagR40_TC_rplL	S. agalactiae	IME	27714	1953888..1981601	NA	firmi_Rep_2	NA	0		34.92
GCA_037244275.1	SagR92_TC_rpsI	S. agalactiae	IME	10526	1027229..1037754	tRNA-Leu	MOBT	NA	0		31.93
GCA_037244275.1	SagR92_TC_rpsI	S. agalactiae	IME	7126	1055213..1062338	rpsI	MOBV	CATGTAAAGTGTAACGCACTACACTTTACTACGTAAATGTGC	0		35.88
GCA_037244275.1	SagR92_TC_rpsI	S. agalactiae	IME	2838	1357957..1360794	rpmG	MOBT	NA	0		40.98
GCA_037248035.1	SagR266	S. agalactiae	IME	2838	1541954..1544791	rpmG	MOBT	NA	0		40.94
GCA_037248035.1	SagR266	S. agalactiae	IME	7127	1840751..1847877	rpsI	MOBV	GCACATTTACGTAGTAAAGTGTAGTGCGTTACACTTTACATG	0		35.92
GCA_037248035.1	SagR266	S. agalactiae	IME	5383	1865341..1870723	tRNA-Tyr	MOBT	NA	0		32.57
GCA_037246145.1	SagR266_TC_rplL	S. agalactiae	IME	8742	1233926..1242667	tRNA-Leu	MOBT	NA	0		32.91
GCA_037246145.1	SagR266_TC_rplL	S. agalactiae	IME	7126	1260146..1267271	rpsI	MOBV	CATGTAAAGTGTAACGCACTACACTTTACTACGTAAATGTGC	0		35.9
GCA_037246145.1	SagR266_TC_rplL	S. agalactiae	IME	2838	1563123..1565960	rpmG	MOBT	NA	0		40.98
GCA_037242635.1	SagR272_TC	S. agalactiae	IME	6851	1113019..1119869	rpsI	MOBV	CATGTAAAGTGTAACGCACTACACTTTACTACGTAAATGTGC	0		36.46
GCA_037242635.1	SagR272_TC	S. agalactiae	IME	8951	1265322..1274272	tRNA-Leu	firmi_Rep_2	NA	0		31.87
GCA_037242635.1	SagR272_TC	S. agalactiae	IME	2203	1448221..1450423	rpmH	firmi_Rep_2	NA	0		35.27
GCA_037242635.1	SagR272_TC	S. agalactiae	IME	4428	1549113..1553540	tRNA-Lys	MOBT	NA	0		30.98
GCA_039614755.1		S. agalactiae	IME	6851	61347..68197	rpsI	MOBV	GCACATTTACGTAGTAAAGTGTAGTGCGTTACACTTTACATG	0		36.48
GCA_039614755.1		S. agalactiae	IME	4427	1722383..1726809	tRNA-Lys	MOBT	NA	0		30.99
GCA_039614755.1		S. agalactiae	IME	2203	1823967..1826169	rpmH	firmi_Rep_2	NA	0		35.22
GCA_040783455.1	QMA0539	S. agalactiae	IME	6850	16552..23401	rpsI	MOBV	CATGTAAAGTGTAACGCACTACACTTTACTACGTAAATGTGC	0		36.47
GCA_040783455.1	QMA0539	S. agalactiae	IME	9631	377718..387348	NA	firmi_Rep_2,firmi_Viral_Rep_B2	NA	0		34.97
GCA_040783455.1	QMA0539	S. agalactiae	IME	4426	493393..497818	tRNA-Lys	MOBT	NA	0		31
GCA_041804565.1	GBS-B4009	S. agalactiae	IME	6852	269475..276326	rpsI	MOBV	GCACATTTACGTAGTAAAGTGTAGTGCGTTACACTTTACATG	0		36.5
GCA_041804565.1	GBS-B4009	S. agalactiae	IME	5383	293790..299172	tRNA-Tyr	MOBT	NA	0		32.58
GCA_050367445.1	T44	S. agalactiae	IME	6851	141742..148592	rpsI	MOBV	GCACATTTACGTAGTAAAGTGTAGTGCGTTACACTTTACATG	0		36.48
GCA_050367445.1	T44	S. agalactiae	IME	18713	1209903..1228615	NA	firmi_Rep_2	NA	0		35.39
GCA_050367445.1	T44	S. agalactiae	IME	2203	1958251..1960453	rpmH	firmi_Rep_2	NA	0		NA
GCA_047783005.1	M18	S. agalactiae	IME	5383	97302..102684	tRNA-Tyr	MOBT	NA	0		32.55
GCA_047783005.1	M18	S. agalactiae	IME	6852	325703..332554	rpsI	MOBV	GCACATTTACGTAGTAAAGTGTAGTGCGTTACACTTTACATG	0		36.49
GCA_047783005.1	M18	S. agalactiae	IME	1993	1889855..1891847	NA	firmi_Rep_2	NA	0		38.13
GCA_047783005.1	M18	S. agalactiae	IME	6309	2207615..2213923	NA	firmi_Viral_Rep_B2	NA	0		33.59
GCA_047783015.1	M14	S. agalactiae	IME	2203	2168883..2171085	rpmH	firmi_Rep_2	NA	0		35.22
GCA_000689235.1	COH1	S. agalactiae	IME	4528	1212603..1217130	NA	PHA_IME_B	NA	0		31.4
GCA_000689235.1	COH1	S. agalactiae	IME	2203	1987943..1990145	rpmH	firmi_Rep_2	NA	0		35.22
GCA_900636375.1	NCTC8184	S. agalactiae	IME	6989	615075..622063	NA	firmi_Rep_2	NA	0		29.86
GCA_900636375.1	NCTC8184	S. agalactiae	IME	7323	775224..782546	tRNA-Tyr	MOBT	NA	0		31.89
GCA_900636375.1	NCTC8184	S. agalactiae	IME	3135	2175677..2178811	tRNA-Leu	MOBT	NA	0		33.3
GCA_900638415.1	NCTC13949	S. agalactiae	IME	6863	230187..237049	rpsI	MOBV	GCACATTTACGTAGTAAAGTGTAGTGCGTTACACTTTACATG	0		36.47
GCA_900638415.1	NCTC13949	S. agalactiae	IME	18370	1222856..1241225	NA	firmi_Rep_2	NA	0		35.32
GCA_900638415.1	NCTC13949	S. agalactiae	IME	2203	1970000..1972202	rpmH	firmi_Rep_2	NA	0		35.22
GCA_900638495.1	NCTC13947	S. agalactiae	IME	2959	107685..110643	guaA	MOBT	NA	0		35.15
GCA_900638495.1	NCTC13947	S. agalactiae	IME	18370	874655..893024	NA	firmi_Rep_2	NA	0		35.33
GCA_900638495.1	NCTC13947	S. agalactiae	IME	6851	1875831..1882681	rpsI	MOBV	CATGTAAAGTGTAACGCACTACACTTTACTACGTAAATGTGC	0		36.46
GCA_900474905.1	NCTC11930	S. agalactiae	IME	4428	173524..177951	tRNA-Lys	MOBT	NA	0		30.98
GCA_900474905.1	NCTC11930	S. agalactiae	IME	18316	805326..823641	NA	firmi_Rep_2	NA	0		35.3
GCA_900474905.1	NCTC11930	S. agalactiae	IME	6851	1807868..1814718	rpsI	MOBV	CATGTAAAGTGTAACGCACTACACTTTACTACGTAAATGTGC	0		36.48
GCA_900474905.1	NCTC11930	S. agalactiae	IME	2203	1986491..1988693	rpmH	firmi_Rep_2	NA	0		35.22
GCA_900475355.1	NCTC8187	S. agalactiae	IME	6851	234842..241692	rpsI	MOBV	GCACATTTACGTAGTAAAGTGTAGTGCGTTACACTTTACATG	0		36.48
GCA_900475355.1	NCTC8187	S. agalactiae	IME	30428	1174085..1204512	NA	firmi_Rep_2,MOBP1	NA	0		34.71
GCA_900475355.1	NCTC8187	S. agalactiae	IME	2203	1973065..1975267	rpmH	firmi_Rep_2	NA	0		35.22
GCA_027474505.1	LGM	S. alactolyticus	IME	1921	180502..182422	rpsI	firmi_Rep_2	NA	0		36.07
GCA_000478925.1	MAS624	S. anginosus	IME	2317	319603..321919	NA	PHA_IME_A1	NA	0		35.05
GCA_000478925.1	MAS624	S. anginosus	IME	6353	515349..521701	rpsI	firmi_Viral_Rep_B1	NA	0		35.62
GCA_000478925.1	MAS624	S. anginosus	IME	5739	804074..809812	rpmE	MOBV	CATGTAAAGTGTAACGCACTACACTTTACTCCGTAAATGTGC	0		36.91
GCA_000478925.1	MAS624	S. anginosus	IME	4164	1178350..1182513	tRNA-Arg	firmi_Rep_2	NA	0		37.73
GCA_000478925.1	MAS624	S. anginosus	IME	8154	1262508..1270661	NA	MOBQ	NA	0		34.47
GCA_000478925.1	MAS624	S. anginosus	IME	7973	1367824..1375796	NA	MOBT	NA	0		36.13
GCA_000478925.1	MAS624	S. anginosus	IME	22333	2087414..2109746	tRNA-Leu	MOBT	NA	0		35.58
GCA_023169525.1	CCUG 27928	S. anginosus	IME	2744	143856..146599	YbaB/EbfC	MOBT	NA	0		34.88
GCA_023169525.1	CCUG 27928	S. anginosus	IME	2302	790414..792715	tRNA-Arg	firmi_Rep_2	NA	0		36.49
GCA_023169525.1	CCUG 27928	S. anginosus	IME	2841	1735431..1738271	TatD	firmi_Viral_Rep_B1	NA	0		35.02
GCA_023169525.1	CCUG 27928	S. anginosus	IME	12865	1880481..1893345	NA	firmi_Rep_2,firmi_Viral_Rep_B2	NA	0		35.44
GCA_000463465.1	C1051	S. anginosus	IME	2286	1082299..1084584	tRNA-Arg	firmi_Rep_2	NA	0		36.18
GCA_000463465.1	C1051	S. anginosus	IME	2296	1114689..1116984	NA	PHA_IME_B	NA	0		34.71
GCA_000463465.1	C1051	S. anginosus	IME	6419	1546725..1553143	NA	MOBV	NA	0		38.04
GCA_000463465.1	C1051	S. anginosus	IME	4665	1851084..1855748	NA	MOBT	NA	0		34.88
GCA_000463505.1	C238	S. anginosus	IME	22299	126809..149107	tRNA-Tyr	MOBT	NA	0		35.57
GCA_000463505.1	C238	S. anginosus	IME	2317	2031546..2033862	tatD	PHA_IME_A1	NA	0		35
GCA_000463505.1	C238	S. anginosus	IME	2959	2170617..2173575	NA	MOBT	NA	0		35.05
GCA_000463505.1	C238	S. anginosus	IME	5484	801441..806924	ftsK	MOBT	NA	0		38.48
GCA_000463505.1	C238	S. anginosus	IME	13694	1540334..1554027	rpmE	MOBV	GCACATTTACGGAGTAAAGTGTAGTGCGTTACACTTTACATG	0		37.45
GCA_000463505.1	C238	S. anginosus	IME	16189	1818387..1834575	rpsI	firmi_Viral_Rep_B1	NA	0		36.33
GCA_001697145.1	J4206	S. anginosus	IME	8102	338964..347065	NA	firmi_Viral_Rep_B2	NA	0		36.63
GCA_001697145.1	J4206	S. anginosus	IME	2157	1056385..1058541	tRNA-Arg	firmi_Rep_2	NA	0		36.58
GCA_001412635.1	J4211	S. anginosus	IME	2302	1049133..1051434	tRNA-Arg	firmi_Rep_2	NA	0		36.19
GCA_001412635.1	J4211	S. anginosus	IME	2296	1081538..1083833	ftsK	PHA_IME_B	NA	0		34.71
GCA_001412635.1	J4211	S. anginosus	IME	6419	1591418..1597836	rpsI	MOBV	NA	0		38.06
GCA_001412635.1	J4211	S. anginosus	IME	6104	1862316..1868419	NA	firmi_Viral_Rep_A	NA	0		34.08
GCA_016725185.1	FDAARGOS_1155	S. anginosus	IME	5460	587496..592955	NA	MOBT	NA	0		38.52
GCA_016725185.1	FDAARGOS_1155	S. anginosus	IME	6382	1326879..1333260	rpmE	MOBV	GCACATTTACGGAGTAAAGTGTAGTGCGTTACACTTTACATG	0		36.46
GCA_016725185.1	FDAARGOS_1155	S. anginosus	IME	17797	1603882..1621678	rpsI	firmi_Viral_Rep_B1	NA	0		36.12
GCA_016725185.1	FDAARGOS_1155	S. anginosus	IME	8778	1745039..1753816	NA	MOBP1	NA	0		33.83
GCA_016725185.1	FDAARGOS_1155	S. anginosus	IME	2317	1829425..1831741	TatD	PHA_IME_A1	NA	0		35
GCA_016725185.1	FDAARGOS_1155	S. anginosus	IME	11388	1962740..1974127	rpmG	MOBT	NA	0		36.11
GCA_016725185.1	FDAARGOS_1155	S. anginosus	IME	22299	2160908..2183206	tRNA-Tyr	MOBT	NA	0		35.57
GCA_016903355.1	FDAARGOS_1357	S. anginosus	IME	13510	1838589..1852098	rpsI	MOBT	NA	0		37.12
GCA_020735765.1	FDAARGOS_1569	S. anginosus	IME	20821	200056..220876	NA	MOBQ	NA	0		33.87
GCA_020735765.1	FDAARGOS_1569	S. anginosus	IME	7047	241771..248817	NA	MOBP1	NA	0		33.01
GCA_020735765.1	FDAARGOS_1569	S. anginosus	IME	2302	608465..610766	tRNA-Arg	firmi_Rep_2	NA	0		36.49
GCA_020735765.1	FDAARGOS_1569	S. anginosus	IME	2714	1254611..1257324	YbaB/EbfC	MOBT	NA	0		34.97
GCA_020735765.1	FDAARGOS_1569	S. anginosus	IME	12865	1463143..1476007	NA	firmi_Viral_Rep_B2,firmi_Rep_2	NA	0		35.44
GCA_020735765.1	FDAARGOS_1569	S. anginosus	IME	7196	1613862..1621057	tRNA-Ser	firmi_Viral_Rep_B1	NA	0		32.41
GCA_021184285.1		S. anginosus	IME	2314	71923..74236	tRNA-Tyr	firmi_Rep_2	NA	0		37.47
GCA_021184285.1		S. anginosus	IME	38568	1264718..1303285	rpsU	MOBP1	NA	0		37.97
GCA_043507435.1	CGMH_KH1	S. anginosus	IME	10043	1027901..1037943	ftsK	PHA_IME_B	NA	0		36.16
GCA_043507435.1	CGMH_KH1	S. anginosus	IME	2296	1150484..1152779	ftsK	PHA_IME_B	NA	0		34.71
GCA_043507435.1	CGMH_KH1	S. anginosus	IME	6419	1566867..1573285	NA	MOBV	NA	0		38.04
GCA_043507435.1	CGMH_KH1	S. anginosus	IME	12113	1623541..1635653	rpsI	MOBT	NA	0		37.84
GCA_043507435.1	CGMH_KH1	S. anginosus	IME	4665	1909667..1914331	ftsK	MOBT	NA	0		34.88
GCA_029011905.1	VSI68	S. anginosus	IME	12716	1375058..1387773	ftsK	MOBT	NA	0		41.82
GCA_029011905.1	VSI68	S. anginosus	IME	6808	1653975..1660782	rpsI	MOBV	NA	0		37.04
GCA_029011905.1	VSI68	S. anginosus	IME	3503	1935678..1939180	rpmG	firmi_Viral_Rep_A	NA	0		35.88
GCA_029010215.1	VSI67	S. anginosus	IME	9485	1007061..1016545	ucpA	firmi_Viral_Rep_A	NA	0		36.26
GCA_029010215.1	VSI67	S. anginosus	IME	6808	1787534..1794341	rpsI	MOBV	CATGTAAAGTGTAACGCACTACACTTTACTCCGTAAATGTGC	0		36.77
GCA_029010275.1	VSI85	S. anginosus	IME	11349	137263..148611	tRNA-Tyr	MOBT	NA	0		37.86
GCA_029010275.1	VSI85	S. anginosus	IME	10295	659188..669482	rplK	MOBP1	NA	0		38.28
GCA_029010275.1	VSI85	S. anginosus	IME	9486	1059775..1069260	NA	firmi_Viral_Rep_B1	NA	0		35.99
GCA_029010275.1	VSI85	S. anginosus	IME	9191	1325767..1334957	NA	MOBP1,MOBV	NA	0		41.51
GCA_029010275.1	VSI85	S. anginosus	IME	22498	1347461..1369958	NA	MOBQ	NA	0		33.12
GCA_029010275.1	VSI85	S. anginosus	IME	2989	1804331..1807319	rpsI	firmi_Viral_Rep_A	NA	0		34.86
GCA_029010275.1	VSI85	S. anginosus	IME	2840	2063897..2066736	NA	MOBT	NA	0		35.21
GCA_029011235.1	VSI52	S. anginosus	IME	6806	1731003..1737808	rpsI	MOBV	CATGTAAAGTGTAACGCACTACACTTTACTCCGTAAATGTGC	0		36.63
GCA_029011235.1	VSI52	S. anginosus	IME	2859	2016976..2019834	NA	firmi_Viral_Rep_A	NA	0		34.28
GCA_029011295.1	VSI40	S. anginosus	IME	9121	133050..142170	tRNA-Tyr	MOBT	NA	0		33.37
GCA_029011295.1	VSI40	S. anginosus	IME	9485	905798..915282	NA	firmi_Viral_Rep_A	NA	0		36.34
GCA_029011295.1	VSI40	S. anginosus	IME	9192	1173602..1182793	DUF2800	MOBP1,MOBV	NA	0		41.49
GCA_029011295.1	VSI40	S. anginosus	IME	6809	1642590..1649398	rpsI	MOBV	CATGTAAAGTGTAACGCACTACACTTTACTCCGTAAATGTGC	0		36.77
GCA_029011355.1	VSI37	S. anginosus	IME	6286	252719..259004	tRNA-Tyr	MOBT	NA	0		37.85
GCA_029011355.1	VSI37	S. anginosus	IME	9482	1054264..1063745	NA	firmi_Viral_Rep_A	NA	0		36.26
GCA_029011355.1	VSI37	S. anginosus	IME	9192	1322991..1332182	DUF2800	MOBP1,MOBV	NA	0		41.48
GCA_029011355.1	VSI37	S. anginosus	IME	6807	1834631..1841437	rpsI	MOBV	CATGTAAAGTGTAACGCACTACACTTTACTCCGTAAATGTGC	0		36.77
GCA_029011615.1	VSI16	S. anginosus	IME	6286	259580..265865	tRNA-Lys	MOBT	NA	0		37.86
GCA_029011615.1	VSI16	S. anginosus	IME	6825	1739601..1746425	rpsI	MOBV	CATGTAAAGTGTAACGCACTACACTTTACTCCGTAAATGTGC	0		36.44
GCA_029011695.1	VSI13	S. anginosus	IME	2949	954477..957425	NA	firmi_Viral_Rep_B1	NA	0		32.32
GCA_029011695.1	VSI13	S. anginosus	IME	19693	1210228..1229920	NA	MOBV	NA	1	tet(O)	42.35
GCA_029011695.1	VSI13	S. anginosus	IME	43660	1268357..1312016	NA	MOBQ	NA	0		33.31
GCA_029011695.1	VSI13	S. anginosus	IME	2859	1862900..1865758	NA	firmi_Viral_Rep_A	NA	0		34.28
GCA_029012025.1	VSI12	S. anginosus	IME	2949	954516..957464	NA	firmi_Viral_Rep_B1	NA	0		32.32
GCA_029012025.1	VSI12	S. anginosus	IME	19692	1210263..1229954	DUF5962	MOBV	NA	0		42.35
GCA_029012025.1	VSI12	S. anginosus	IME	43660	1268393..1312052	YlbF/YmcA	MOBQ	NA	0		33.31
GCA_029012025.1	VSI12	S. anginosus	IME	2859	1863014..1865872	rpmG	firmi_Viral_Rep_A	NA	0		34.28
GCA_008726525.2	UMB4708	S. anginosus	IME	5668	136565..142232	tRNA-Tyr	MOBT	NA	0		32.85
GCA_008726525.2	UMB4708	S. anginosus	IME	2538	1143327..1145864	NA	MOBT	NA	0		42.36
GCA_008726525.2	UMB4708	S. anginosus	IME	9192	1369967..1379158	DUF2800	MOBP1,MOBV	NA	0		41.5
GCA_008726525.2	UMB4708	S. anginosus	IME	17784	1391726..1409509	NA	MOBQ	NA	0		32.5
GCA_008726525.2	UMB4708	S. anginosus	IME	7384	2076732..2084115	ftsK	MOBT	NA	0		34.34
GCA_008726365.3	UMB8616	S. anginosus	IME	5668	133816..139483	tRNA-Tyr	MOBT	NA	0		32.89
GCA_008726365.3	UMB8616	S. anginosus	IME	9486	975818..985303	ucpA	firmi_Viral_Rep_B1	NA	0		35.92
GCA_008726365.3	UMB8616	S. anginosus	IME	19237	1269306..1288542	NA	MOBQ	NA	0		34.58
GCA_008726365.3	UMB8616	S. anginosus	IME	6807	1695278..1702084	rpsI	MOBV	CATGTAAAGTGTAACGCACTACACTTTACTCCGTAAATGTGC	0		36.83
GCA_050613235.1	980/01	S. anginosus	IME	11374	126659..138032	tRNA-Cys	MOBT	NA	0		37.89
GCA_050613235.1	980/01	S. anginosus	IME	17082	780865..797946	NA	MOBC	NA	0		35.97
GCA_036236295.2	UMB3052	S. anginosus	IME	9739	2127052..2136790	NA	MOBQ	NA	0		31.06
GCA_036236295.2	UMB3052	S. anginosus	IME	6407	87722..94128	rpmE	MOBV	GCACTTTTACGAAGTAAAGCGTAGTGCGTTACACTTTACATG	0		33.4
GCA_036236295.2	UMB3052	S. anginosus	IME	2859	647880..650738	rpmG	firmi_Viral_Rep_A	NA	0		33.96
GCA_036236295.2	UMB3052	S. anginosus	IME	9121	846179..855299	tRNA-Tyr	MOBT	NA	0		33.36
GCA_036236295.2	UMB3052	S. anginosus	IME	25980	2024488..2050467	rpsU	MOBP1	NA	0		38.35
GCA_036236295.2	UMB3052	S. anginosus	IME	16027	2063663..2079689	rlmD	MOBP1,MOBQ	NA	0		30.14
GCA_036236295.2	UMB3052	S. anginosus	IME	10636	2101314..2111949	NA	MOBQ	NA	0		31.04
GCA_036234475.2	UMB2693	S. anginosus	IME	6807	1667233..1674039	rpsI	MOBV	CATGTAAAGTGTAACGCACTACACTTTACTCCGTAAATGTGC	0		37.06
GCA_036234475.2	UMB2693	S. anginosus	IME	2859	1905305..1908163	rpmG	firmi_Viral_Rep_A	NA	0		34.28
GCA_018919275.2	UMB1353	S. anginosus	IME	6792	1670016..1676807	rpsI	MOBV	CATGTAAAGTGTAACGCACTACACTTTACTCCGTAAATGTGC	0		36.12
GCA_018919275.2	UMB1353	S. anginosus	IME	2466	1918831..1921296	type II restriction endonuclease	MOBT	NA	0		32.32
GCA_900636475.1	NCTC10713	S. anginosus	IME	10847	7585..18431	gatC	MOBP1	NA	0		38.02
GCA_900636475.1	NCTC10713	S. anginosus	IME	2302	705063..707364	tRNA-Arg	firmi_Rep_2	NA	0		36.49
GCA_900636475.1	NCTC10713	S. anginosus	IME	2714	1351209..1353922	NA	MOBT	NA	0		34.97
GCA_900636475.1	NCTC10713	S. anginosus	IME	12865	1559741..1572605	NA	firmi_Viral_Rep_B2,firmi_Rep_2	NA	0		35.44
GCA_900636475.1	NCTC10713	S. anginosus	IME	2841	1714815..1717655	tatD	firmi_Viral_Rep_B1	NA	0		35.02
GCA_901542485.1	NCTC11064	S. anginosus	IME	6419	1471541..1477959	NA	MOBV	NA	0		38
GCA_901542485.1	NCTC11064	S. anginosus	IME	13509	1499307..1512815	NA	MOBT	CCCACTATTTCTAATAGGGGGGTTA	0		37.03
GCA_901542485.1	NCTC11064	S. anginosus	IME	2320	1711508..1713827	tatD	PHA_IME_A1	NA	0		35.65
GCA_900636505.1	NCTC3168	S. australis	IME	9162	565182..574343	tRNA-Leu	MOBT	NA	0		33.75
GCA_900636505.1	NCTC3168	S. australis	IME	1925	1038173..1040097	rpsI	firmi_Rep_2	NA	0		36.83
GCA_901543175.1	NCTC5338	S. australis	IME	2203	121769..123971	rpmH	firmi_Rep_2	NA	0		35.41
GCA_901543175.1	NCTC5338	S. australis	IME	5031	1672354..1677384	ctpF	MOBC	NA	0		38.86
GCA_900476055.1	NCTC13166	S. australis	IME	11015	109557..120571	ftsK	MOBT	NA	0		38.6
GCA_900476055.1	NCTC13166	S. australis	IME	6423	165993..172415	tRNA-Tyr	MOBT	NA	0		32.31
GCA_009738555.1	HL_100	S. canis	IME	6559	299359..305917	rpsI	firmi_Rep_2	NA	0		36.99
GCA_009738555.1	HL_100	S. canis	IME	11600	1056121..1067720	NA	firmi_Rep_2	NA	0		37.47
GCA_010993865.2	HL_98_2	S. canis	IME	4951	307372..312322	NA	firmi_Rep_2	NA	0		37.99
GCA_010993865.2	HL_98_2	S. canis	IME	10963	755216..766178	rpsU	MOBP1	NA	0		39.6
GCA_010993865.2	HL_98_2	S. canis	IME	2202	2116541..2118742	rpmG	firmi_Rep_2	NA	0		35.38
GCA_010993845.2	HL_77_2	S. canis	IME	2202	2091931..2094132	rpmG	firmi_Rep_2	NA	0		35.38
GCA_010993915.2	HL_77_1	S. canis	IME	9705	88581..98285	tRNA-Trp	PHA_IME_A1	NA	0		34.55
GCA_010993915.2	HL_77_1	S. canis	IME	13272	1064166..1077437	NA	firmi_Viral_Rep_B1	NA	0		36.97
GCA_010993915.2	HL_77_1	S. canis	IME	21653	1728084..1749736	NA	MOBQ	NA	0		34.53
GCA_010993915.2	HL_77_1	S. canis	IME	2202	2214593..2216794	rpmG	firmi_Rep_2	NA	0		35.38
GCA_900636575.1	NCTC12191	S. canis	IME	9204	245363..254566	tRNA-Ala	firmi_Rep_2	NA	0		40.28
GCA_900636575.1	NCTC12191	S. canis	IME	7965	478088..486052	tRNA-Leu	PHA_IME_A1	NA	0		33.26
GCA_900636575.1	NCTC12191	S. canis	IME	2203	622413..624615	rpmH	firmi_Rep_2	NA	0		35.27
GCA_900636575.1	NCTC12191	S. canis	IME	10381	1563868..1574248	NA	firmi_Viral_Rep_B1	NA	0		36.34
GCA_901521425.1	B700072	S. canis	IME	6559	299279..305837	rpsI	firmi_Rep_2	NA	0		37.02
GCA_901521425.1	B700072	S. canis	IME	11600	1040431..1052030	NA	firmi_Rep_2	NA	0		37.47
GCA_901521425.1	B700072	S. canis	IME	12017	1296215..1308231	ltrA	MOBP1	NA	0		37.23
GCA_003086355.2	Z15	S. chenjunshii	IME	13245	186244..199488	tRNA-Lys	MOBT	NA	0		37.13
GCA_003086355.2	Z15	S. chenjunshii	IME	31313	1102556..1133868	NA	firmi_MOBL	NA	0		38.79
GCA_000463395.1	C232	S. constellatus	IME	13770	864172..877941	lplA	firmi_Viral_Rep_B1	NA	0		35
GCA_000463395.1	C232	S. constellatus	IME	2302	967225..969526	tRNA-Arg	firmi_Rep_2	NA	0		36.75
GCA_000463395.1	C232	S. constellatus	IME	6587	1762385..1768971	tRNA-Leu	PHA_IME_A1	NA	0		32.96
GCA_000463395.1	C232	S. constellatus	IME	2203	1870549..1872751	rpmH	firmi_Rep_2	NA	0		34.59
GCA_000463445.1	C818	S. constellatus	IME	13770	864401..878170	lplA	firmi_Viral_Rep_B1	NA	0		35
GCA_000463445.1	C818	S. constellatus	IME	2302	967454..969755	tRNA-Arg	firmi_Rep_2	NA	0		36.75
GCA_000463445.1	C818	S. constellatus	IME	6587	1762633..1769219	tRNA-Leu	PHA_IME_A1	NA	0		32.96
GCA_000463445.1	C818	S. constellatus	IME	2203	1870797..1872999	rpmH	firmi_Rep_2	NA	0		34.59
GCA_000463425.1	C1050	S. constellatus	IME	13770	943831..957600	guaA	firmi_Viral_Rep_B1	NA	0		35
GCA_000463425.1	C1050	S. constellatus	IME	6587	1818127..1824713	tRNA-Leu	PHA_IME_A1	NA	0		32.94
GCA_000463425.1	C1050	S. constellatus	IME	2203	1926291..1928493	rpmH	firmi_Rep_2	NA	0		34.59
GCA_024399395.1	TCV107	S. constellatus	IME	2956	936988..939943	ftsK	MOBT	NA	0		35.39
GCA_024399395.1	TCV107	S. constellatus	IME	2302	1729574..1731875	tRNA-Arg	firmi_Rep_2	NA	0		35.84
GCA_016127875.1	FDAARGOS_1015	S. constellatus	IME	21942	40842..62783	NA	MOBQ,MOBP1	NA	0		32.69
GCA_016127875.1	FDAARGOS_1015	S. constellatus	IME	5767	1094487..1100253	rpmH	MOBP1	NA	0		35.62
GCA_016127875.1	FDAARGOS_1015	S. constellatus	IME	8498	1424850..1433347	tRNA-Tyr	PHA_IME_A1	NA	0		32.37
GCA_016127875.1	FDAARGOS_1015	S. constellatus	IME	2157	1441648..1443804	NA	firmi_Rep_2	NA	0		36.39
GCA_016127875.1	FDAARGOS_1015	S. constellatus	IME	16840	1518397..1535236	tRNA-Lys	MOBT	NA	0		36.16
GCA_016889885.1	FDAARGOS_1208	S. constellatus	IME	13770	466233..480002	NA	firmi_Viral_Rep_B1	NA	0		35
GCA_016889885.1	FDAARGOS_1208	S. constellatus	IME	6587	1349639..1356225	tRNA-Leu	PHA_IME_A1	NA	0		32.94
GCA_016889885.1	FDAARGOS_1208	S. constellatus	IME	2203	1749702..1751904	rpmH	firmi_Rep_2	NA	0		34.63
GCA_016889885.1	FDAARGOS_1208	S. constellatus	IME	2157	1920535..1922691	NA	firmi_Rep_2	NA	0		36.72
GCA_019336935.2	11-6117	S. constellatus	IME	2316	154068..156383	NA	PHA_IME_A1	NA	0		34.24
GCA_019336935.2	11-6117	S. constellatus	IME	2302	1014733..1017034	tRNA-Arg	firmi_Rep_2	NA	0		36.79
GCA_019336935.2	11-6117	S. constellatus	IME	3059	1816566..1819624	NA	firmi_Viral_Rep_A	NA	0		NA
GCA_000385925.1	AS 1.3089	S. cristatus	IME	5031	1293932..1298962	NA	MOBC	NA	0		39.4
GCA_900475445.1	NCTC12479	S. cristatus	IME	2338	1212034..1214371	msbA	PHA_IME_A1	NA	0		35.71
GCA_900478185.1	NCTC13807	S. cristatus	IME	5031	411688..416718	NA	MOBC	NA	0		39.42
GCA_000010705.1	GGS_124	S. dysgalactiae	IME	11446	252595..264040	rpsI	MOBV	GCACATTTACGTAGTAAAGTGTAGTGCGTTACACTTTACATG	0		36.41
GCA_000010705.1	GGS_124	S. dysgalactiae	IME	14620	1281984..1296603	NA	MOBQ	NA	0		NA
GCA_000307185.1	RE378	S. dysgalactiae	IME	10955	257831..268785	ftsK	MOBT	NA	0		38
GCA_000307185.1	RE378	S. dysgalactiae	IME	1925	286099..288023	rpsI	firmi_Rep_2	NA	0		37.61
GCA_000307185.1	RE378	S. dysgalactiae	IME	2249	977337..979585	mcrC	PHA_IME_B	NA	0		33.17
GCA_000307185.1	RE378	S. dysgalactiae	IME	12590	1869470..1882059	NA	firmi_Rep_2	NA	0		41.05
GCA_000307185.1	RE378	S. dysgalactiae	IME	6035	2105622..2111656	NA	MOBC	NA	0		38.33
GCA_014192695.1	89	S. dysgalactiae	IME	11785	274412..286196	rpsI	MOBV	GCACATTTACGTAGTAAAGTGTAGTGCGTTACACTTTACATG	0		36.48
GCA_014192695.1	89	S. dysgalactiae	IME	12321	587012..599332	ftsK	MOBT	NA	0		36.28
GCA_014192895.1	159	S. dysgalactiae	IME	4866	257129..261994	ftsK	MOBT	NA	0		39.97
GCA_014192895.1	159	S. dysgalactiae	IME	12321	582530..594850	ftsK	MOBT	NA	0		36.29
GCA_014192895.1	159	S. dysgalactiae	IME	37437	1510415..1547851	tRNA-Thr	MOBT	ACCCCCCTATTAGAAATCGGGGGTT	0		34.48
GCA_014192895.1	159	S. dysgalactiae	IME	4974	2048292..2053265	rpmG	firmi_Rep_2,MOBC	NA	0		35.56
GCA_000188715.1	ATCC 12394	S. dysgalactiae	IME	2993	184676..187668	tRNA-Lys	firmi_Viral_Rep_B1	NA	0		30.7
GCA_000188715.1	ATCC 12394	S. dysgalactiae	IME	13262	258585..271846	NA	MOBT	NA	0		40.46
GCA_000188715.1	ATCC 12394	S. dysgalactiae	IME	12321	593883..606203	ftsK	MOBT	NA	0		36.27
GCA_000188715.1	ATCC 12394	S. dysgalactiae	IME	4000	932680..936679	rpsU	MOBP1	NA	0		32.52
GCA_000188715.1	ATCC 12394	S. dysgalactiae	IME	4975	2099290..2104264	rpmG	firmi_Rep_2,MOBC	NA	0		35.58
GCA_009650235.1		S. dysgalactiae	IME	11169	708768..719936	ftsK	MOBT	NA	0		42.48
GCA_009650235.1		S. dysgalactiae	IME	3709	908855..912563	tRNA-Leu	firmi_Rep_2	NA	0		32.57
GCA_009650235.1		S. dysgalactiae	IME	6106	1266936..1273041	NA	firmi_Rep_2	NA	0		31.69
GCA_009650235.1		S. dysgalactiae	IME	64244	1572873..1637116	tRNA-Thr	MOBT	NA	0		30.84
GCA_009650255.1		S. dysgalactiae	IME	7306	1275516..1282821	NA	PHA_IME_B	NA	0		37.04
GCA_009650255.1		S. dysgalactiae	IME	12077	1998629..2010705	rpsI	MOBV	CATGTAAAGTGTAACGCACTACACTTTACTACGTAAATGTGC	0		36.59
GCA_009650255.1		S. dysgalactiae	IME	5426	2242224..2247649	tRNA-Leu	firmi_Rep_2	NA	0		30.93
GCA_009650275.1		S. dysgalactiae	IME	11921	193651..205571	tRNA-Lys	MOBT	NA	0		32.72
GCA_009650275.1		S. dysgalactiae	IME	11172	276818..287989	ftsK	MOBT	NA	0		42.5
GCA_009650275.1		S. dysgalactiae	IME	29664	335397..365060	tRNA-Leu	MOBT	NA	0		36.42
GCA_008693725.1	FDAARGOS_654	S. dysgalactiae	IME	12321	388916..401236	ftsK	MOBT	NA	0		36.24
GCA_008693725.1	FDAARGOS_654	S. dysgalactiae	IME	2963	844570..847532	tRNA-Lys	firmi_Viral_Rep_B1	NA	0		30.71
GCA_008693725.1	FDAARGOS_654	S. dysgalactiae	IME	4198	953549..957746	tRNA-Leu	firmi_Rep_2	NA	0		31.11
GCA_012844385.1	TPCH-A19	S. dysgalactiae	IME	9487	92438..101924	tRNA-His	firmi_Rep_2	NA	0		30.82
GCA_012844385.1	TPCH-A19	S. dysgalactiae	IME	14798	306827..321624	rpmE	MOBV,MOBT	GCACATTTACGGAGTAAAGTGTAGTGCGTTACACTTTACATG	0		37.88
GCA_012844385.1	TPCH-A19	S. dysgalactiae	IME	35540	1522599..1558138	tRNA-Thr	MOBT	CAAATCTTACCCCCCTATTAGAAATCGGGGGTT	0		34.78
GCA_012844405.1	TPCH-A74	S. dysgalactiae	IME	9486	92426..101911	tRNA-His	firmi_Rep_2	NA	0		30.81
GCA_012844405.1	TPCH-A74	S. dysgalactiae	IME	5952	272021..277972	ftsK	MOBT	CTTGCGAAGAAAAAATAATGCTAAA	0		40.22
GCA_012844405.1	TPCH-A74	S. dysgalactiae	IME	46752	1317111..1363862	rlmD	MOBP1,MOBQ	NA	0		35.03
GCA_012844405.1	TPCH-A74	S. dysgalactiae	IME	17657	1563506..1581162	tRNA-Thr	MOBT	NA	0		33.16
GCA_013004125.1	TPCH-A88	S. dysgalactiae	IME	9486	93401..102886	tRNA-His	firmi_Rep_2	NA	0		30.81
GCA_013004125.1	TPCH-A88	S. dysgalactiae	IME	5952	272993..278944	ftsK	MOBT	CTTGCGAAGAAAAAATAATGCTAAA	0		40.22
GCA_013004125.1	TPCH-A88	S. dysgalactiae	IME	45530	1275277..1320806	rlmD	MOBP1,MOBQ	NA	0		34.89
GCA_013004125.1	TPCH-A88	S. dysgalactiae	IME	17657	1519474..1537130	tRNA-Thr	MOBT	NA	0		33.17
GCA_016128095.1	FDAARGOS_1017	S. dysgalactiae	IME	12321	1905876..1918196	ftsK	MOBT	NA	0		36.26
GCA_016128135.1	FDAARGOS_1016	S. dysgalactiae	IME	13261	192728..205988	ftsK	MOBT	NA	0		40.43
GCA_016128135.1	FDAARGOS_1016	S. dysgalactiae	IME	12321	510577..522897	ftsK	MOBT	NA	0		36.29
GCA_016128135.1	FDAARGOS_1016	S. dysgalactiae	IME	4974	2101009..2105982	rpmG	firmi_Rep_2,MOBC	NA	0		35.59
GCA_016724885.1	FDAARGOS_1157	S. dysgalactiae	IME	29237	21520..50756	tRNA-Thr	MOBT	ACCCCCGTTTTCTAATAGGGGGGTAAGATTTG	0		35.82
GCA_016724885.1	FDAARGOS_1157	S. dysgalactiae	IME	4566	1362384..1366949	NA	firmi_Rep_2	NA	0		38.98
GCA_016766775.1		S. dysgalactiae	IME	6586	224039..230624	NA	MOBC	NA	0		38.1
GCA_016766775.1		S. dysgalactiae	IME	12591	454480..467070	NA	firmi_Rep_2	NA	0		41.05
GCA_016766775.1		S. dysgalactiae	IME	13182	932148..945329	ftsK	MOBT	NA	0		38.53
GCA_016766775.1		S. dysgalactiae	IME	21801	962645..984445	tRNA-Ala	firmi_Rep_2	NA	0		39.57
GCA_016766775.1		S. dysgalactiae	IME	2249	1654514..1656762	mcrC	PHA_IME_B	NA	0		33.17
GCA_019856435.1	DY107	S. dysgalactiae	IME	4139	7083..11221	NA	profile_MOBT	NA	0		38.05
GCA_019856435.1	DY107	S. dysgalactiae	IME	6097	97442..103538	tRNA-Tyr	MOBT	NA	0		35.74
GCA_019856435.1	DY107	S. dysgalactiae	IME	11539	294653..306191	NA	PHA_IME_B	NA	0		34.41
GCA_019856435.1	DY107	S. dysgalactiae	IME	2714	1954651..1957364	ftsK	MOBT	NA	0		35.52
GCA_022532125.1	Karl	S. dysgalactiae	IME	2837	1949073..1951909	ftsK	MOBT	NA	0		36.31
GCA_026692645.1	WJ001	S. dysgalactiae	IME	59997	241075..301071	tRNA-Lys	MOBT	NA	0		33.27
GCA_026692645.1	WJ001	S. dysgalactiae	IME	6733	169..6901	rpsU	MOBP1	NA	0		34.92
GCA_029234045.1	MGCS36089	S. dysgalactiae	IME	8960	92705..101664	tRNA-Ala	firmi_Rep_2	NA	0		31.89
GCA_029234045.1	MGCS36089	S. dysgalactiae	IME	2994	200438..203431	tRNA-Lys	firmi_Viral_Rep_B1	NA	0		30.59
GCA_029234045.1	MGCS36089	S. dysgalactiae	IME	7748	1008119..1015866	dppA	PHA_IME_B	NA	0		37.91
GCA_029234045.1	MGCS36089	S. dysgalactiae	IME	2968	1025952..1028919	guaA	firmi_Viral_Rep_B1	NA	0		33.09
GCA_029234045.1	MGCS36089	S. dysgalactiae	IME	2202	2093833..2096034	rpmG	firmi_Rep_2	NA	0		35.33
GCA_029234065.1	MGCS36083	S. dysgalactiae	IME	4257	84161..88417	tRNA-Ala	firmi_Rep_2	NA	0		45.22
GCA_029234065.1	MGCS36083	S. dysgalactiae	IME	2994	200438..203431	tRNA-Lys	firmi_Viral_Rep_B1	NA	0		30.59
GCA_029234065.1	MGCS36083	S. dysgalactiae	IME	10741	283901..294641	ftsK	MOBT	NA	0		40.27
GCA_029234065.1	MGCS36083	S. dysgalactiae	IME	5876	978362..984237	rpsU	MOBP1	NA	0		33.59
GCA_029234065.1	MGCS36083	S. dysgalactiae	IME	20844	1071104..1091947	NA	PHA_IME_B,firmi_Viral_Rep_B1	NA	0		33.37
GCA_029234065.1	MGCS36083	S. dysgalactiae	IME	2202	2154980..2157181	rpmG	firmi_Rep_2	NA	0		35.33
GCA_029234095.1	MGGS36055	S. dysgalactiae	IME	13188	263658..276845	ftsK	MOBT	NA	0		38.55
GCA_029234095.1	MGGS36055	S. dysgalactiae	IME	1925	294161..296085	rpsI	firmi_Rep_2	NA	0		36.99
GCA_029234095.1	MGGS36055	S. dysgalactiae	IME	12591	1922332..1934922	NA	firmi_Rep_2	NA	0		41.05
GCA_029234115.1	MGCS36044	S. dysgalactiae	IME	8960	92705..101664	tRNA-Ala	firmi_Rep_2	NA	0		31.89
GCA_029234115.1	MGCS36044	S. dysgalactiae	IME	2994	200438..203431	tRNA-Lys	firmi_Viral_Rep_B1	NA	0		30.59
GCA_029234115.1	MGCS36044	S. dysgalactiae	IME	7748	1015929..1023676	dppA	PHA_IME_B	NA	0		37.87
GCA_029234115.1	MGCS36044	S. dysgalactiae	IME	2968	1033762..1036729	guaA	firmi_Viral_Rep_B1	NA	0		33.09
GCA_029234115.1	MGCS36044	S. dysgalactiae	IME	2202	2100530..2102731	rpmG	firmi_Rep_2	NA	0		35.33
GCA_029234135.1	MGCS35957	S. dysgalactiae	IME	4257	78289..82545	tRNA-Ala	firmi_Rep_2	NA	0		45.22
GCA_029234135.1	MGCS35957	S. dysgalactiae	IME	2994	194541..197534	tRNA-Lys	firmi_Viral_Rep_B1	NA	0		30.59
GCA_029234135.1	MGCS35957	S. dysgalactiae	IME	10741	277991..288731	ftsK	MOBT	NA	0		40.27
GCA_029234135.1	MGCS35957	S. dysgalactiae	IME	20776	1049660..1070435	NA	PHA_IME_B,firmi_Viral_Rep_B1	NA	0		33.35
GCA_029234135.1	MGCS35957	S. dysgalactiae	IME	2202	2175692..2177893	rpmG	firmi_Rep_2	NA	0		35.33
GCA_029234155.1	MGCS35823	S. dysgalactiae	IME	4258	84161..88418	tRNA-Ala	firmi_Rep_2	NA	0		45.23
GCA_029234155.1	MGCS35823	S. dysgalactiae	IME	2994	200442..203435	tRNA-Lys	firmi_Viral_Rep_B1	NA	0		30.59
GCA_029234155.1	MGCS35823	S. dysgalactiae	IME	10741	283905..294645	ftsK	MOBT	NA	0		40.27
GCA_029234155.1	MGCS35823	S. dysgalactiae	IME	20810	1046603..1067412	NA	PHA_IME_B,firmi_Viral_Rep_B1	NA	0		33.35
GCA_029234155.1	MGCS35823	S. dysgalactiae	IME	14109	2131746..2145854	rpmG	firmi_Rep_2,MOBC	NA	0		32.95
GCA_029234175.1	MGCS35922	S. dysgalactiae	IME	4256	84092..88347	tRNA-Ala	firmi_Rep_2	NA	0		45.21
GCA_029234175.1	MGCS35922	S. dysgalactiae	IME	2994	200368..203361	tRNA-Lys	firmi_Viral_Rep_B1	NA	0		30.56
GCA_029234175.1	MGCS35922	S. dysgalactiae	IME	10741	283831..294571	ftsK	MOBT	NA	0		40.27
GCA_029234175.1	MGCS35922	S. dysgalactiae	IME	20799	1015691..1036489	NA	PHA_IME_B,firmi_Viral_Rep_B1	NA	0		33.37
GCA_029234175.1	MGCS35922	S. dysgalactiae	IME	31788	1338941..1370728	rpsU	MOBP1	NA	0		34.96
GCA_029234175.1	MGCS35922	S. dysgalactiae	IME	2203	2166050..2168252	rpmH	firmi_Rep_2	NA	0		35.09
GCA_030034715.1	UT_10236	S. dysgalactiae	IME	8960	92705..101664	tRNA-Ala	firmi_Rep_2	NA	0		31.89
GCA_030034715.1	UT_10236	S. dysgalactiae	IME	2993	200438..203430	tRNA-Lys	firmi_Viral_Rep_B1	NA	0		30.6
GCA_030034715.1	UT_10236	S. dysgalactiae	IME	47008	1321941..1368948	rlmD	MOBP1,MOBQ	NA	0		34.16
GCA_030034715.1	UT_10236	S. dysgalactiae	IME	10466	1863925..1874390	rpsN	firmi_Rep_2	NA	0		37.91
GCA_030034715.1	UT_10236	S. dysgalactiae	IME	2202	2082266..2084467	rpmG	firmi_Rep_2	NA	0		35.33
GCA_030034695.1	UT_120444	S. dysgalactiae	IME	13182	262346..275527	ftsK	MOBT	NA	0		38.53
GCA_030034695.1	UT_120444	S. dysgalactiae	IME	1925	292842..294766	rpsI	firmi_Rep_2	NA	0		36.99
GCA_030034695.1	UT_120444	S. dysgalactiae	IME	10924	1384833..1395756	NA	MOBQ	NA	0		32.5
GCA_030034695.1	UT_120444	S. dysgalactiae	IME	11834	1405688..1417521	NA	MOBQ	NA	0		33.06
GCA_030034695.1	UT_120444	S. dysgalactiae	IME	12591	1950578..1963168	NA	firmi_Rep_2	NA	0		41.05
GCA_030034695.1	UT_120444	S. dysgalactiae	IME	6145	2236012..2242156	NA	MOBC	NA	0		38.24
GCA_030291215.1	TPCH-F37	S. dysgalactiae	IME	13182	255380..268561	ftsK	MOBT	NA	0		38.53
GCA_030291215.1	TPCH-F37	S. dysgalactiae	IME	1925	285877..287801	rpsI	firmi_Rep_2	NA	0		37.56
GCA_030291215.1	TPCH-F37	S. dysgalactiae	IME	2249	976529..978777	mcrC	PHA_IME_B	NA	0		33.17
GCA_030291215.1	TPCH-F37	S. dysgalactiae	IME	12591	1835156..1847746	NA	firmi_Rep_2	NA	0		41.05
GCA_030291215.1	TPCH-F37	S. dysgalactiae	IME	6145	2071518..2077662	NA	MOBC	NA	0		38.28
GCA_036815195.1	NS3396	S. dysgalactiae	IME	12354	183185..195538	ftsK	MOBT	NA	0		31.06
GCA_036815195.1	NS3396	S. dysgalactiae	IME	12593	1921284..1933876	NA	firmi_Rep_2	NA	0		41.03
GCA_045345565.1	STG643	S. dysgalactiae	IME	8960	92698..101657	tRNA-Ala	firmi_Rep_2	NA	0		31.88
GCA_045345565.1	STG643	S. dysgalactiae	IME	2993	199328..202320	tRNA-Lys	firmi_Viral_Rep_B1	NA	0		30.6
GCA_045345565.1	STG643	S. dysgalactiae	IME	1925	307221..309145	rpsI	firmi_Rep_2	NA	0		37.56
GCA_045345565.1	STG643	S. dysgalactiae	IME	10466	1880707..1891172	rpsN	firmi_Rep_2	NA	0		37.92
GCA_045345565.1	STG643	S. dysgalactiae	IME	14091	2148461..2162551	rpmG	firmi_Rep_2,MOBC	NA	0		32.99
GCA_042821045.1	MGGS36030	S. dysgalactiae	IME	13182	263698..276879	ftsK	MOBT	NA	0		38.56
GCA_042821045.1	MGGS36030	S. dysgalactiae	IME	1925	294195..296119	rpsI	firmi_Rep_2	NA	0		36.99
GCA_042821045.1	MGGS36030	S. dysgalactiae	IME	12591	1920844..1933434	NA	firmi_Rep_2	NA	0		41.05
GCA_042821045.1	MGGS36030	S. dysgalactiae	IME	6145	2158050..2164194	NA	MOBC	NA	0		38.24
GCA_042821135.1	MGGS36021	S. dysgalactiae	IME	22286	262294..284579	NA	MOBV,MOBT	GCACATTTACGTAGTAAAGTGTAGTGCGTTACACTTTACATG	0		37.3
GCA_042821135.1	MGGS36021	S. dysgalactiae	IME	1925	301895..303819	rpsI	firmi_Rep_2	NA	0		36.99
GCA_042821135.1	MGGS36021	S. dysgalactiae	IME	2249	993706..995954	mcrC	PHA_IME_B	NA	0		33.17
GCA_042821135.1	MGGS36021	S. dysgalactiae	IME	12591	1909372..1921962	NA	firmi_Rep_2	NA	0		41.05
GCA_042821135.1	MGGS36021	S. dysgalactiae	IME	6145	2195301..2201445	NA	MOBC	NA	0		38.24
GCA_042822305.1	MGGS35977	S. dysgalactiae	IME	16764	65551..82314	NA	MOBC,MOBT	NA	0		37.43
GCA_042822305.1	MGGS35977	S. dysgalactiae	IME	12591	346696..359286	NA	firmi_Rep_2	NA	0		41.04
GCA_042822305.1	MGGS35977	S. dysgalactiae	IME	1925	1974356..1976280	rpsI	firmi_Rep_2	NA	0		37.61
GCA_042822305.1	MGGS35977	S. dysgalactiae	IME	13182	1993596..2006777	ftsK	MOBT	NA	0		38.56
GCA_042822795.1	MGCS36101	S. dysgalactiae	IME	8960	92705..101664	tRNA-Ala	firmi_Rep_2	NA	0		31.89
GCA_042822795.1	MGCS36101	S. dysgalactiae	IME	2993	200438..203430	tRNA-Lys	firmi_Viral_Rep_B1	NA	0		30.6
GCA_042822795.1	MGCS36101	S. dysgalactiae	IME	20946	1015946..1036891	guaA	PHA_IME_B,firmi_Viral_Rep_B1	NA	0		33.34
GCA_042822795.1	MGCS36101	S. dysgalactiae	IME	10465	1877722..1888186	rpsN	firmi_Rep_2	NA	0		37.94
GCA_042822795.1	MGCS36101	S. dysgalactiae	IME	14106	2096063..2110168	rpmG	firmi_Rep_2,MOBC	NA	0		32.96
GCA_042823405.1	MGCS36090	S. dysgalactiae	IME	8960	92705..101664	tRNA-Ala	firmi_Rep_2	NA	0		31.89
GCA_042823405.1	MGCS36090	S. dysgalactiae	IME	2993	200438..203430	tRNA-Lys	firmi_Viral_Rep_B1	NA	0		30.6
GCA_042823405.1	MGCS36090	S. dysgalactiae	IME	20801	1014654..1035454	guaA	PHA_IME_B,firmi_Viral_Rep_B1	NA	0		33.37
GCA_042823405.1	MGCS36090	S. dysgalactiae	IME	10466	1882614..1893079	rpsN	firmi_Rep_2	NA	0		37.92
GCA_042823405.1	MGCS36090	S. dysgalactiae	IME	14105	2133927..2148031	rpmG	firmi_Rep_2,MOBC	NA	0		32.95
GCA_042823915.1	MGCS36086	S. dysgalactiae	IME	8960	92705..101664	tRNA-Ala	firmi_Rep_2	NA	0		31.89
GCA_042823915.1	MGCS36086	S. dysgalactiae	IME	2993	200438..203430	tRNA-Lys	firmi_Viral_Rep_B1	NA	0		30.6
GCA_042823915.1	MGCS36086	S. dysgalactiae	IME	20801	1014629..1035429	guaA	PHA_IME_B,firmi_Viral_Rep_B1	NA	0		33.37
GCA_042823915.1	MGCS36086	S. dysgalactiae	IME	10466	1934908..1945373	rpsN	firmi_Rep_2	NA	0		37.91
GCA_042823915.1	MGCS36086	S. dysgalactiae	IME	14106	2153135..2167240	rpmG	firmi_Rep_2,MOBC	NA	0		32.96
GCA_042824005.1	MGCS36085	S. dysgalactiae	IME	8960	92705..101664	tRNA-Ala	firmi_Rep_2	NA	0		31.89
GCA_042824005.1	MGCS36085	S. dysgalactiae	IME	2993	200437..203429	tRNA-Lys	firmi_Viral_Rep_B1	NA	0		30.64
GCA_042824005.1	MGCS36085	S. dysgalactiae	IME	20801	1017251..1038051	guaA	PHA_IME_B,firmi_Viral_Rep_B1	NA	0		33.37
GCA_042824005.1	MGCS36085	S. dysgalactiae	IME	10466	1926340..1936805	rpsN	firmi_Rep_2	NA	0		37.91
GCA_042824005.1	MGCS36085	S. dysgalactiae	IME	14106	2144669..2158774	rpmG	firmi_Rep_2,MOBC	NA	0		32.96
GCA_042824935.1	MGCS36071	S. dysgalactiae	IME	8960	92704..101663	tRNA-Ala	firmi_Rep_2	NA	0		31.88
GCA_042824935.1	MGCS36071	S. dysgalactiae	IME	2993	200437..203429	tRNA-Lys	firmi_Viral_Rep_B1	NA	0		30.6
GCA_042824935.1	MGCS36071	S. dysgalactiae	IME	7748	1014624..1022371	dppA	PHA_IME_B	NA	0		37.91
GCA_042824935.1	MGCS36071	S. dysgalactiae	IME	2968	1032499..1035466	guaA	firmi_Viral_Rep_B1	NA	0		33.05
GCA_042824935.1	MGCS36071	S. dysgalactiae	IME	10466	1880047..1890512	rpsN	firmi_Rep_2	NA	0		37.92
GCA_042824935.1	MGCS36071	S. dysgalactiae	IME	2202	2098294..2100495	rpmG	firmi_Rep_2	NA	0		35.33
GCA_042825465.1	MGCS36067	S. dysgalactiae	IME	8960	92705..101664	tRNA-Ala	firmi_Rep_2	NA	0		31.89
GCA_042825465.1	MGCS36067	S. dysgalactiae	IME	2993	200438..203430	tRNA-Lys	firmi_Viral_Rep_B1	NA	0		30.6
GCA_042825465.1	MGCS36067	S. dysgalactiae	IME	4000	923736..927735	rpsU	MOBP1	NA	0		32.5
GCA_042825465.1	MGCS36067	S. dysgalactiae	IME	20801	1014551..1035351	guaA	PHA_IME_B,firmi_Viral_Rep_B1	NA	0		33.37
GCA_042825465.1	MGCS36067	S. dysgalactiae	IME	10466	1880651..1891116	rpsN	firmi_Rep_2	NA	0		37.92
GCA_042825465.1	MGCS36067	S. dysgalactiae	IME	2202	2098993..2101194	rpmG	firmi_Rep_2	NA	0		35.33
GCA_042826005.1	MGCS36066	S. dysgalactiae	IME	8960	92705..101664	tRNA-Ala	firmi_Rep_2	NA	0		31.89
GCA_042826005.1	MGCS36066	S. dysgalactiae	IME	2993	200438..203430	tRNA-Lys	firmi_Viral_Rep_B1	NA	0		NA
GCA_042826005.1	MGCS36066	S. dysgalactiae	IME	7748	1014595..1022342	dppA	PHA_IME_B	NA	0		NA
GCA_042826005.1	MGCS36066	S. dysgalactiae	IME	2968	1032427..1035394	guaA	firmi_Viral_Rep_B1	NA	0		NA
GCA_042826005.1	MGCS36066	S. dysgalactiae	IME	10466	1934866..1945331	rpsN	firmi_Rep_2	NA	0		NA
GCA_042826005.1	MGCS36066	S. dysgalactiae	IME	14106	2153089..2167194	rpmG	firmi_Rep_2,MOBC	NA	0		NA
GCA_042828865.1	MGCS36049	S. dysgalactiae	IME	8960	92705..101664	tRNA-Ala	firmi_Rep_2	NA	0		31.89
GCA_042828865.1	MGCS36049	S. dysgalactiae	IME	2993	200438..203430	tRNA-Lys	firmi_Viral_Rep_B1	NA	0		30.6
GCA_042828865.1	MGCS36049	S. dysgalactiae	IME	20845	1014665..1035509	guaA	PHA_IME_B,firmi_Viral_Rep_B1	NA	0		33.37
GCA_042828865.1	MGCS36049	S. dysgalactiae	IME	10466	1880052..1890517	rpsN	firmi_Rep_2	NA	0		37.92
GCA_042828865.1	MGCS36049	S. dysgalactiae	IME	14106	2098394..2112499	rpmG	firmi_Rep_2,MOBC	NA	0		32.96
GCA_042830455.1	MGCS36042	S. dysgalactiae	IME	8960	92706..101665	tRNA-Ala	firmi_Rep_2	NA	0		31.89
GCA_042830455.1	MGCS36042	S. dysgalactiae	IME	2993	200439..203431	tRNA-Lys	firmi_Viral_Rep_B1	NA	0		30.6
GCA_042830455.1	MGCS36042	S. dysgalactiae	IME	20801	1014629..1035429	guaA	PHA_IME_B,firmi_Viral_Rep_B1	NA	0		33.36
GCA_042830455.1	MGCS36042	S. dysgalactiae	IME	10466	1883247..1893712	rpsN	firmi_Rep_2	NA	0		37.91
GCA_042830455.1	MGCS36042	S. dysgalactiae	IME	14106	2101590..2115695	rpmG	firmi_Rep_2,MOBC	NA	0		32.96
GCA_042830985.1	MGCS36038	S. dysgalactiae	IME	8960	92705..101664	tRNA-Ala	firmi_Rep_2	NA	0		31.9
GCA_042830985.1	MGCS36038	S. dysgalactiae	IME	2993	200434..203426	tRNA-Lys	firmi_Viral_Rep_B1	NA	0		30.6
GCA_042830985.1	MGCS36038	S. dysgalactiae	IME	20801	1016053..1036853	guaA	PHA_IME_B,firmi_Viral_Rep_B1	NA	0		33.37
GCA_042830985.1	MGCS36038	S. dysgalactiae	IME	10466	1883303..1893768	rpsN	firmi_Rep_2	NA	0		37.92
GCA_042830985.1	MGCS36038	S. dysgalactiae	IME	4974	2101646..2106619	rpmG	firmi_Rep_2,MOBC	NA	0		35.56
GCA_042835875.1	MGCS36018	S. dysgalactiae	IME	8960	92704..101663	tRNA-Ala	firmi_Rep_2	NA	0		31.88
GCA_042835875.1	MGCS36018	S. dysgalactiae	IME	2993	200437..203429	tRNA-Lys	firmi_Viral_Rep_B1	NA	0		30.64
GCA_042835875.1	MGCS36018	S. dysgalactiae	IME	20801	1014602..1035402	guaA	PHA_IME_B,firmi_Viral_Rep_B1	NA	0		33.37
GCA_042835875.1	MGCS36018	S. dysgalactiae	IME	10466	1881673..1892138	rpsN	firmi_Rep_2	NA	0		37.92
GCA_042835875.1	MGCS36018	S. dysgalactiae	IME	14106	2100015..2114120	rpmG	firmi_Rep_2,MOBC	NA	0		32.96
GCA_042836465.1	MGCS36016	S. dysgalactiae	IME	8960	92705..101664	tRNA-Ala	firmi_Rep_2	NA	0		31.89
GCA_042836465.1	MGCS36016	S. dysgalactiae	IME	2993	200438..203430	tRNA-Lys	firmi_Viral_Rep_B1	NA	0		30.6
GCA_042836465.1	MGCS36016	S. dysgalactiae	IME	7748	1014729..1022476	dppA	PHA_IME_B	NA	0		37.89
GCA_042836465.1	MGCS36016	S. dysgalactiae	IME	2968	1032561..1035528	guaA	firmi_Viral_Rep_B1	NA	0		33.09
GCA_042836465.1	MGCS36016	S. dysgalactiae	IME	10466	1882034..1892499	rpsN	firmi_Rep_2	NA	0		37.92
GCA_042836465.1	MGCS36016	S. dysgalactiae	IME	14106	2100377..2114482	rpmG	firmi_Rep_2,MOBC	NA	0		32.96
GCA_042836995.1	MGCS36014	S. dysgalactiae	IME	8960	92704..101663	tRNA-Ala	firmi_Rep_2	NA	0		31.89
GCA_042836995.1	MGCS36014	S. dysgalactiae	IME	2993	198727..201719	tRNA-Lys	firmi_Viral_Rep_B1	NA	0		30.6
GCA_042836995.1	MGCS36014	S. dysgalactiae	IME	20801	1012858..1033658	guaA	PHA_IME_B,firmi_Viral_Rep_B1	NA	0		33.38
GCA_042836995.1	MGCS36014	S. dysgalactiae	IME	10445	1880334..1890778	NA	firmi_Rep_2	NA	0		37.93
GCA_042836995.1	MGCS36014	S. dysgalactiae	IME	14106	2098656..2112761	rpmG	firmi_Rep_2,MOBC	NA	0		32.95
GCA_042837585.1	MGCS36011	S. dysgalactiae	IME	8960	92705..101664	tRNA-Ala	firmi_Rep_2	NA	0		31.89
GCA_042837585.1	MGCS36011	S. dysgalactiae	IME	2993	200438..203430	tRNA-Lys	firmi_Viral_Rep_B1	NA	0		30.6
GCA_042837585.1	MGCS36011	S. dysgalactiae	IME	15300	1076634..1091933	NA	PHA_IME_B,firmi_Viral_Rep_B1	NA	0		31.08
GCA_042837585.1	MGCS36011	S. dysgalactiae	IME	10466	1938050..1948515	rpsN	firmi_Rep_2	NA	0		37.93
GCA_042837585.1	MGCS36011	S. dysgalactiae	IME	2202	2156393..2158594	rpmG	firmi_Rep_2	NA	0		35.33
GCA_042839455.1	MGCS36000	S. dysgalactiae	IME	8960	86833..95792	tRNA-Ala	firmi_Rep_2	NA	0		31.89
GCA_042839455.1	MGCS36000	S. dysgalactiae	IME	2993	194566..197558	tRNA-Lys	firmi_Viral_Rep_B1	NA	0		30.6
GCA_042839455.1	MGCS36000	S. dysgalactiae	IME	20801	1008120..1028920	guaA	PHA_IME_B,firmi_Viral_Rep_B1	NA	0		33.37
GCA_042839455.1	MGCS36000	S. dysgalactiae	IME	10466	1873633..1884098	rpsN	firmi_Rep_2	NA	0		NA
GCA_042839455.1	MGCS36000	S. dysgalactiae	IME	14106	2091976..2106081	rpmG	firmi_Rep_2,MOBC	NA	0		NA
GCA_042839885.1	MGCS35999	S. dysgalactiae	IME	8960	92705..101664	tRNA-Ala	firmi_Rep_2	NA	0		31.88
GCA_042839885.1	MGCS35999	S. dysgalactiae	IME	2993	200436..203428	tRNA-Lys	firmi_Viral_Rep_B1	NA	0		30.6
GCA_042839885.1	MGCS35999	S. dysgalactiae	IME	20769	1015973..1036741	NA	PHA_IME_B,firmi_Viral_Rep_B1	NA	0		33.35
GCA_042839885.1	MGCS35999	S. dysgalactiae	IME	10466	1882926..1893391	rpsN	firmi_Rep_2	NA	0		37.92
GCA_042839885.1	MGCS35999	S. dysgalactiae	IME	2202	2102595..2104796	rpmG	firmi_Rep_2	NA	0		35.33
GCA_042840455.1	MGCS35997	S. dysgalactiae	IME	8960	92704..101663	tRNA-Ala	firmi_Rep_2	NA	0		31.89
GCA_042840455.1	MGCS35997	S. dysgalactiae	IME	2993	200436..203428	tRNA-Lys	firmi_Viral_Rep_B1	NA	0		30.6
GCA_042840455.1	MGCS35997	S. dysgalactiae	IME	20801	1017249..1038049	guaA	PHA_IME_B,firmi_Viral_Rep_B1	NA	0		33.38
GCA_042840455.1	MGCS35997	S. dysgalactiae	IME	10466	1884181..1894646	rpsN	firmi_Rep_2	NA	0		37.92
GCA_042840455.1	MGCS35997	S. dysgalactiae	IME	14106	2102522..2116627	rpmG	firmi_Rep_2,MOBC	NA	0		32.95
GCA_042840885.1	MGCS35988	S. dysgalactiae	IME	8960	92706..101665	tRNA-Ala	firmi_Rep_2	NA	0		31.89
GCA_042840885.1	MGCS35988	S. dysgalactiae	IME	2993	200438..203430	tRNA-Lys	firmi_Viral_Rep_B1	NA	0		30.6
GCA_042840885.1	MGCS35988	S. dysgalactiae	IME	10466	1909311..1919776	rpsN	firmi_Rep_2	NA	0		37.93
GCA_042840885.1	MGCS35988	S. dysgalactiae	IME	14106	2127654..2141759	rpmG	firmi_Rep_2,MOBC	NA	0		32.95
GCA_042841075.1	MGCS35987	S. dysgalactiae	IME	8960	92705..101664	tRNA-Ala	firmi_Rep_2	NA	0		31.89
GCA_042841075.1	MGCS35987	S. dysgalactiae	IME	2993	200438..203430	tRNA-Lys	firmi_Viral_Rep_B1	NA	0		30.6
GCA_042841075.1	MGCS35987	S. dysgalactiae	IME	20815	1014727..1035541	NA	PHA_IME_B,firmi_Viral_Rep_B1	NA	0		33.37
GCA_042841075.1	MGCS35987	S. dysgalactiae	IME	52985	1339610..1392594	rlmD	MOBP1,MOBQ	NA	0		34.05
GCA_042841075.1	MGCS35987	S. dysgalactiae	IME	10466	1889813..1900278	rpsN	firmi_Rep_2	NA	0		37.92
GCA_042841075.1	MGCS35987	S. dysgalactiae	IME	2202	2108155..2110356	rpmG	firmi_Rep_2	NA	0		35.33
GCA_042841845.1	MGCS35984	S. dysgalactiae	IME	8960	92705..101664	tRNA-Ala	firmi_Rep_2	NA	0		31.89
GCA_042841845.1	MGCS35984	S. dysgalactiae	IME	2993	200438..203430	tRNA-Lys	firmi_Viral_Rep_B1	NA	0		30.6
GCA_042841845.1	MGCS35984	S. dysgalactiae	IME	20801	1015929..1036729	guaA	PHA_IME_B,firmi_Viral_Rep_B1	NA	0		33.37
GCA_042841845.1	MGCS35984	S. dysgalactiae	IME	47566	1340798..1388363	rlmD	MOBP1,MOBQ	NA	0		34.54
GCA_042841845.1	MGCS35984	S. dysgalactiae	IME	10466	1882851..1893316	rpsN	firmi_Rep_2	NA	0		37.92
GCA_042841845.1	MGCS35984	S. dysgalactiae	IME	2202	2101194..2103395	rpmG	firmi_Rep_2	NA	0		35.33
GCA_042842215.1	MGCS35983	S. dysgalactiae	IME	8960	92667..101626	tRNA-Ala	firmi_Rep_2	NA	0		31.89
GCA_042842215.1	MGCS35983	S. dysgalactiae	IME	2993	200399..203391	tRNA-Lys	firmi_Viral_Rep_B1	NA	0		30.6
GCA_042842215.1	MGCS35983	S. dysgalactiae	IME	20845	1014536..1035380	guaA	PHA_IME_B,firmi_Viral_Rep_B1	NA	0		33.37
GCA_042842215.1	MGCS35983	S. dysgalactiae	IME	10466	1879846..1890311	rpsN	firmi_Rep_2	NA	0		37.92
GCA_042842215.1	MGCS35983	S. dysgalactiae	IME	14106	2098187..2112292	rpmG	firmi_Rep_2,MOBC	NA	0		32.96
GCA_042842865.1	MGCS35980	S. dysgalactiae	IME	8960	86833..95792	tRNA-Ala	firmi_Rep_2	NA	0		31.89
GCA_042842865.1	MGCS35980	S. dysgalactiae	IME	2993	194597..197589	tRNA-Lys	firmi_Viral_Rep_B1	NA	0		30.6
GCA_042842865.1	MGCS35980	S. dysgalactiae	IME	20801	1008788..1029588	guaA	PHA_IME_B,firmi_Viral_Rep_B1	NA	0		33.35
GCA_042842865.1	MGCS35980	S. dysgalactiae	IME	10466	1915871..1926336	rpsN	firmi_Rep_2	NA	0		37.92
GCA_042842865.1	MGCS35980	S. dysgalactiae	IME	14106	2171018..2185123	rpmG	firmi_Rep_2,MOBC	NA	0		32.95
GCA_042843455.1	MGCS35978	S. dysgalactiae	IME	8960	92705..101664	tRNA-Ala	firmi_Rep_2	NA	0		31.89
GCA_042843455.1	MGCS35978	S. dysgalactiae	IME	2993	200474..203466	tRNA-Lys	firmi_Viral_Rep_B1	NA	0		30.6
GCA_042843455.1	MGCS35978	S. dysgalactiae	IME	7748	1014653..1022400	dppA	PHA_IME_B	NA	0		37.88
GCA_042843455.1	MGCS35978	S. dysgalactiae	IME	2968	1033815..1036782	guaA	firmi_Viral_Rep_B1	NA	0		33.09
GCA_042843455.1	MGCS35978	S. dysgalactiae	IME	10466	1883187..1893652	rpsN	firmi_Rep_2	NA	0		37.91
GCA_042843455.1	MGCS35978	S. dysgalactiae	IME	14106	2101529..2115634	rpmG	firmi_Rep_2,MOBC	NA	0		32.96
GCA_042844005.1	MGCS35973	S. dysgalactiae	IME	4199	92675..96873	tRNA-Ala	firmi_Rep_2	NA	0		NA
GCA_042844005.1	MGCS35973	S. dysgalactiae	IME	2993	200438..203430	tRNA-Lys	firmi_Viral_Rep_B1	NA	0		NA
GCA_042844005.1	MGCS35973	S. dysgalactiae	IME	20801	1014666..1035466	guaA	PHA_IME_B,firmi_Viral_Rep_B1	NA	0		NA
GCA_042844005.1	MGCS35973	S. dysgalactiae	IME	10466	1881439..1891904	rpsN	firmi_Rep_2	NA	0		NA
GCA_042844005.1	MGCS35973	S. dysgalactiae	IME	2202	2099169..2101370	rpmG	firmi_Rep_2	NA	0		NA
GCA_042844555.1	MGCS35972	S. dysgalactiae	IME	8972	92705..101676	tRNA-Ala	firmi_Rep_2	NA	0		31.9
GCA_042844555.1	MGCS35972	S. dysgalactiae	IME	2993	200450..203442	tRNA-Lys	firmi_Viral_Rep_B1	NA	0		30.64
GCA_042844555.1	MGCS35972	S. dysgalactiae	IME	20837	1014614..1035450	NA	PHA_IME_B,firmi_Viral_Rep_B1	NA	0		33.4
GCA_042844555.1	MGCS35972	S. dysgalactiae	IME	10466	1925558..1936023	rpsN	firmi_Rep_2	NA	0		37.93
GCA_042844555.1	MGCS35972	S. dysgalactiae	IME	14106	2143901..2158006	rpmG	firmi_Rep_2,MOBC	NA	0		32.96
GCA_042845655.1	MGCS35965	S. dysgalactiae	IME	8960	92703..101662	tRNA-Ala	firmi_Rep_2	NA	0		31.89
GCA_042845655.1	MGCS35965	S. dysgalactiae	IME	2993	200436..203428	tRNA-Lys	firmi_Viral_Rep_B1	NA	0		30.6
GCA_042845655.1	MGCS35965	S. dysgalactiae	IME	7748	1015071..1022818	dppA	PHA_IME_B	NA	0		37.89
GCA_042845655.1	MGCS35965	S. dysgalactiae	IME	2968	1032949..1035916	guaA	firmi_Viral_Rep_B1	NA	0		33.09
GCA_042845655.1	MGCS35965	S. dysgalactiae	IME	10466	1880374..1890839	rpsN	firmi_Rep_2	NA	0		37.91
GCA_042845655.1	MGCS35965	S. dysgalactiae	IME	14105	2098717..2112821	rpmG	firmi_Rep_2,MOBC	NA	0		32.95
GCA_042847285.1	MGCS35960	S. dysgalactiae	IME	8960	92693..101652	tRNA-Ala	firmi_Rep_2	NA	0		31.89
GCA_042847285.1	MGCS35960	S. dysgalactiae	IME	2993	200426..203418	tRNA-Lys	firmi_Viral_Rep_B1	NA	0		30.6
GCA_042847285.1	MGCS35960	S. dysgalactiae	IME	10445	1865994..1876438	NA	firmi_Rep_2	NA	0		37.93
GCA_042847285.1	MGCS35960	S. dysgalactiae	IME	2202	2084316..2086517	rpmG	firmi_Rep_2	NA	0		35.33
GCA_042848965.1	MGCS35953	S. dysgalactiae	IME	8960	86833..95792	tRNA-Ala	firmi_Rep_2	NA	0		31.89
GCA_042848965.1	MGCS35953	S. dysgalactiae	IME	2993	194566..197558	tRNA-Lys	firmi_Viral_Rep_B1	NA	0		30.6
GCA_042848965.1	MGCS35953	S. dysgalactiae	IME	20801	1010216..1031016	guaA	PHA_IME_B,firmi_Viral_Rep_B1	NA	0		33.38
GCA_042848965.1	MGCS35953	S. dysgalactiae	IME	10466	1877275..1887740	rpsN	firmi_Rep_2	NA	0		37.92
GCA_042848965.1	MGCS35953	S. dysgalactiae	IME	14106	2095619..2109724	rpmG	firmi_Rep_2,MOBC	NA	0		32.96
GCA_042850475.1	MGCS35952	S. dysgalactiae	IME	8960	92681..101640	tRNA-Ala	firmi_Rep_2	NA	0		31.89
GCA_042850475.1	MGCS35952	S. dysgalactiae	IME	2993	200414..203406	tRNA-Lys	firmi_Viral_Rep_B1	NA	0		30.6
GCA_042850475.1	MGCS35952	S. dysgalactiae	IME	20799	1014700..1035498	NA	PHA_IME_B,firmi_Viral_Rep_B1	NA	0		33.37
GCA_042850475.1	MGCS35952	S. dysgalactiae	IME	10466	1890534..1900999	rpsN	firmi_Rep_2	NA	0		37.91
GCA_042850475.1	MGCS35952	S. dysgalactiae	IME	2202	2108877..2111078	rpmG	firmi_Rep_2	NA	0		35.33
GCA_042852015.1	MGCS35941	S. dysgalactiae	IME	8918	92722..101639	tRNA-Trp	firmi_Rep_2	NA	0		31.77
GCA_042852015.1	MGCS35941	S. dysgalactiae	IME	2993	200413..203405	tRNA-Lys	firmi_Viral_Rep_B1	NA	0		30.6
GCA_042852015.1	MGCS35941	S. dysgalactiae	IME	20845	1014538..1035382	guaA	PHA_IME_B,firmi_Viral_Rep_B1	NA	0		33.37
GCA_042852015.1	MGCS35941	S. dysgalactiae	IME	10466	1879780..1890245	rpsN	firmi_Rep_2	NA	0		NA
GCA_042852015.1	MGCS35941	S. dysgalactiae	IME	14106	2098121..2112226	rpmG	firmi_Rep_2,MOBC	NA	0		NA
GCA_042853255.1	MGCS35940	S. dysgalactiae	IME	8960	86831..95790	tRNA-Ala	firmi_Rep_2	NA	0		31.88
GCA_042853255.1	MGCS35940	S. dysgalactiae	IME	2993	194564..197556	tRNA-Lys	firmi_Viral_Rep_B1	NA	0		30.6
GCA_042853255.1	MGCS35940	S. dysgalactiae	IME	20801	1068010..1088810	guaA	PHA_IME_B,firmi_Viral_Rep_B1	NA	0		NA
GCA_042853255.1	MGCS35940	S. dysgalactiae	IME	10466	1935455..1945920	rpsN	firmi_Rep_2	NA	0		NA
GCA_042853255.1	MGCS35940	S. dysgalactiae	IME	14106	2153799..2167904	rpmG	firmi_Rep_2,MOBC	NA	0		NA
GCA_042854585.1	MGCS35939	S. dysgalactiae	IME	8960	92705..101664	tRNA-Ala	firmi_Rep_2	NA	0		31.89
GCA_042854585.1	MGCS35939	S. dysgalactiae	IME	2993	200436..203428	tRNA-Lys	firmi_Viral_Rep_B1	NA	0		30.6
GCA_042854585.1	MGCS35939	S. dysgalactiae	IME	20844	1015799..1036642	NA	PHA_IME_B,firmi_Viral_Rep_B1	NA	0		33.36
GCA_042854585.1	MGCS35939	S. dysgalactiae	IME	10466	1881298..1891763	rpsN	firmi_Rep_2	NA	0		37.91
GCA_042854585.1	MGCS35939	S. dysgalactiae	IME	14106	2100967..2115072	rpmG	firmi_Rep_2,MOBC	NA	0		32.96
GCA_042855555.1	MGCS35926	S. dysgalactiae	IME	8961	92829..101789	tRNA-Ala	firmi_Rep_2	NA	0		31.89
GCA_042855555.1	MGCS35926	S. dysgalactiae	IME	2993	200563..203555	tRNA-Lys	firmi_Viral_Rep_B1	NA	0		30.64
GCA_042855555.1	MGCS35926	S. dysgalactiae	IME	20800	1015949..1036748	NA	PHA_IME_B,firmi_Viral_Rep_B1	NA	0		33.38
GCA_042855555.1	MGCS35926	S. dysgalactiae	IME	10466	1923630..1934095	rpsN	firmi_Rep_2	NA	0		37.92
GCA_042855555.1	MGCS35926	S. dysgalactiae	IME	14105	2190091..2204195	rpmG	firmi_Rep_2,MOBC	NA	0		32.95
GCA_042858075.1	MGCS35904	S. dysgalactiae	IME	8960	92705..101664	tRNA-Ala	firmi_Rep_2	NA	0		31.9
GCA_042858075.1	MGCS35904	S. dysgalactiae	IME	2993	200438..203430	tRNA-Lys	firmi_Viral_Rep_B1	NA	0		30.6
GCA_042858075.1	MGCS35904	S. dysgalactiae	IME	10466	1899478..1909943	rpsN	firmi_Rep_2	NA	0		NA
GCA_042858075.1	MGCS35904	S. dysgalactiae	IME	14106	2117818..2131923	rpmG	firmi_Rep_2,MOBC	NA	0		NA
GCA_042858705.1	MGCS35901	S. dysgalactiae	IME	8960	92705..101664	tRNA-Ala	firmi_Rep_2	NA	0		31.88
GCA_042858705.1	MGCS35901	S. dysgalactiae	IME	2993	200437..203429	tRNA-Lys	firmi_Viral_Rep_B1	NA	0		30.6
GCA_042858705.1	MGCS35901	S. dysgalactiae	IME	20845	1014581..1035425	guaA	PHA_IME_B,firmi_Viral_Rep_B1	NA	0		33.36
GCA_042858705.1	MGCS35901	S. dysgalactiae	IME	10466	1880081..1890546	rpsN	firmi_Rep_2	NA	0		37.91
GCA_042858705.1	MGCS35901	S. dysgalactiae	IME	14106	2098425..2112530	rpmG	firmi_Rep_2,MOBC	NA	0		32.96
GCA_042859375.1	MGCS35898	S. dysgalactiae	IME	2993	200528..203520	tRNA-Lys	firmi_Viral_Rep_B1	NA	0		30.6
GCA_042859375.1	MGCS35898	S. dysgalactiae	IME	20801	1014819..1035619	guaA	PHA_IME_B,firmi_Viral_Rep_B1	NA	0		33.37
GCA_042859375.1	MGCS35898	S. dysgalactiae	IME	10466	1882111..1892576	rpsN	firmi_Rep_2	NA	0		NA
GCA_042859375.1	MGCS35898	S. dysgalactiae	IME	14106	2100452..2114557	rpmG	firmi_Rep_2,MOBC	NA	0		NA
GCA_042860615.1	MGCS35893	S. dysgalactiae	IME	8960	92705..101664	tRNA-Ala	firmi_Rep_2	NA	0		31.89
GCA_042860615.1	MGCS35893	S. dysgalactiae	IME	2993	201764..204756	tRNA-Lys	firmi_Viral_Rep_B1	NA	0		30.6
GCA_042860615.1	MGCS35893	S. dysgalactiae	IME	20801	1015965..1036765	guaA	PHA_IME_B,firmi_Viral_Rep_B1	NA	0		33.36
GCA_042860615.1	MGCS35893	S. dysgalactiae	IME	10466	1939368..1949833	rpsN	firmi_Rep_2	NA	0		37.93
GCA_042860615.1	MGCS35893	S. dysgalactiae	IME	14106	2157712..2171817	rpmG	firmi_Rep_2,MOBC	NA	0		32.95
GCA_042861675.1	MGCS35892	S. dysgalactiae	IME	8960	92705..101664	tRNA-Ala	firmi_Rep_2	NA	0		31.89
GCA_042861675.1	MGCS35892	S. dysgalactiae	IME	2993	200438..203430	tRNA-Lys	firmi_Viral_Rep_B1	NA	0		30.6
GCA_042861675.1	MGCS35892	S. dysgalactiae	IME	20800	1014727..1035526	NA	PHA_IME_B,firmi_Viral_Rep_B1	NA	0		33.36
GCA_042861675.1	MGCS35892	S. dysgalactiae	IME	10466	1881919..1892384	rpsN	firmi_Rep_2	NA	0		37.92
GCA_042861675.1	MGCS35892	S. dysgalactiae	IME	2202	2100257..2102458	rpmG	firmi_Rep_2	NA	0		35.33
GCA_042863435.1	MGCS35887	S. dysgalactiae	IME	8960	92705..101664	tRNA-Ala	firmi_Rep_2	NA	0		31.89
GCA_042863435.1	MGCS35887	S. dysgalactiae	IME	2993	200438..203430	tRNA-Lys	firmi_Viral_Rep_B1	NA	0		30.64
GCA_042863435.1	MGCS35887	S. dysgalactiae	IME	20801	1014551..1035351	guaA	PHA_IME_B,firmi_Viral_Rep_B1	NA	0		33.36
GCA_042863435.1	MGCS35887	S. dysgalactiae	IME	10466	1879780..1890245	rpsN	firmi_Rep_2	NA	0		37.92
GCA_042863435.1	MGCS35887	S. dysgalactiae	IME	14106	2098118..2112223	rpmG	firmi_Rep_2,MOBC	NA	0		32.95
GCA_042866015.1	MGCS35876	S. dysgalactiae	IME	8960	92704..101663	tRNA-Ala	firmi_Rep_2	NA	0		31.89
GCA_042866015.1	MGCS35876	S. dysgalactiae	IME	13750	194764..208513	tRNA-Lys	MOBT,firmi_Viral_Rep_B1	NA	0		33.76
GCA_042866015.1	MGCS35876	S. dysgalactiae	IME	7748	1024750..1032497	dppA	PHA_IME_B	NA	0		37.92
GCA_042866015.1	MGCS35876	S. dysgalactiae	IME	2968	1042626..1045593	guaA	firmi_Viral_Rep_B1	NA	0		33.09
GCA_042866015.1	MGCS35876	S. dysgalactiae	IME	10466	1939332..1949797	rpsN	firmi_Rep_2	NA	0		37.92
GCA_042866015.1	MGCS35876	S. dysgalactiae	IME	2202	2157673..2159874	rpmG	firmi_Rep_2	NA	0		35.33
GCA_042868505.1	MGCS35873	S. dysgalactiae	IME	8959	92694..101652	tRNA-Trp	firmi_Rep_2	NA	0		31.89
GCA_042868505.1	MGCS35873	S. dysgalactiae	IME	2993	200426..203418	tRNA-Lys	firmi_Viral_Rep_B1	NA	0		30.6
GCA_042868505.1	MGCS35873	S. dysgalactiae	IME	7748	1014611..1022358	dppA	PHA_IME_B	NA	0		37.88
GCA_042868505.1	MGCS35873	S. dysgalactiae	IME	2968	1032445..1035412	guaA	firmi_Viral_Rep_B1	NA	0		33.09
GCA_042868505.1	MGCS35873	S. dysgalactiae	IME	10466	1879908..1890373	rpsN	firmi_Rep_2	NA	0		37.92
GCA_042868505.1	MGCS35873	S. dysgalactiae	IME	14106	2147733..2161838	rpmG	firmi_Rep_2,MOBC	NA	0		32.96
GCA_042871315.1	MGCS35871	S. dysgalactiae	IME	8960	92705..101664	tRNA-Ala	firmi_Rep_2	NA	0		31.89
GCA_042871315.1	MGCS35871	S. dysgalactiae	IME	2993	200438..203430	tRNA-Lys	firmi_Viral_Rep_B1	NA	0		30.6
GCA_042871315.1	MGCS35871	S. dysgalactiae	IME	7748	1014603..1022350	dppA	PHA_IME_B	NA	0		37.91
GCA_042871315.1	MGCS35871	S. dysgalactiae	IME	2968	1032435..1035402	guaA	firmi_Viral_Rep_B1	NA	0		33.09
GCA_042871315.1	MGCS35871	S. dysgalactiae	IME	14106	2100181..2114286	rpmG	firmi_Rep_2,MOBC	NA	0		32.96
GCA_042873075.1	MGCS35869	S. dysgalactiae	IME	8960	92704..101663	tRNA-Ala	firmi_Rep_2	NA	0		31.89
GCA_042873075.1	MGCS35869	S. dysgalactiae	IME	2993	200437..203429	tRNA-Lys	firmi_Viral_Rep_B1	NA	0		30.6
GCA_042873075.1	MGCS35869	S. dysgalactiae	IME	20799	1015918..1036716	NA	PHA_IME_B,firmi_Viral_Rep_B1	NA	0		33.36
[truncated: 1,437 more rows]

## Sheet: Table_S5_Prophage_information
Assembly Accession	Strain name	Species	MGE class	Element size (bp)	Genomic location	Insertion locus	Number of ARGs	ARG(s)
[truncated: 3,397 more rows]

[truncated: 2 more sheets: Table_S6A_MGE_density, Table_S6B_Plasmid_distribution]
